# Supplementary material for: Proteomic remodelling of the neurofibrillary tangle from “PART” to advanced Alzheimer’s disease
Source: Research Square preprint supplement (doi:10.21203/rs.3.rs-8703254/v1), 2026-01-29
Supplement: Supplementary file 1 [file 01396b289437f982af3ff552.xlsx]

## Sheet: Table 2a
Online Resource 2a Functional enrichment analysis of the 63 tangle-associated proteins common to PART, intermediate AD and advanced AD groups
Rank	Category	Description	FDR value	# Genes	Percentage in network	Genes	Term name	# Background genes
1	GO Molecular Function	RNA binding	4.13e-52	58	92.0635	SNRPD3|PABPN1|HNRNPL|SRSF6|H4C6|TRIM28|SRSF1|NOP58|HNRNPH3|NONO|FAM120A|NPM1|HNRNPUL2|SF3B3|HNRNPD|PRKDC|MYEF2|NCL|FARSA|HNRNPM|SRSF7|H1-10|PURA|DHX15|HNRNPA1|PSPC1|HNRNPA2B1|HNRNPH1|ELAVL4|SFPQ|XRCC6|MATR3-2|ILF2|PARP1|DHX9|ADAR|SYNCRIP|RBMX|HNRNPH2|HNRNPR|HNRNPK|NOP56|HNRNPA3|DDX17|ELAVL1|RPL23A|EFTUD2|ILF3|TRA2B|RPLP0|HNRNPC|CCDC124|RPS28|SUGP2|SNRNP70|RPS10|HNRNPU|EIF4A3	GO:0003723	1672
2	GO Biological Process	Negative regulation of mRNA metabolic process	1.76e-16	14	22.2222	HNRNPL|SRSF6|NPM1|HNRNPD|SRSF7|HNRNPA2B1|ELAVL4|DHX9|SYNCRIP|RBMX|HNRNPK|ELAVL1|HNRNPC|HNRNPU	GO:1903312	92
3	GO Biological Process	Ribonucleoprotein complex assembly	2.74e-08	11	17.4603	SNRPD3|SRSF6|SRSF1|SF3B3|PRKDC|DHX9|ADAR|RBMX|RPL23A|RPLP0|RPS28	GO:0022618	203
4	GO Biological Process	Alternative mRNA splicing, via spliceosome	1.9e-07	6	9.52381	SRSF6|SRSF1|HNRNPM|SFPQ|DHX9|DDX17	GO:0000380	25
5	GO Biological Process	Regulation of alternative mRNA splicing, via spliceosome	6.08e-07	7	11.1111	HNRNPL|SRSF6|HNRNPA1|RBMX|DDX17|TRA2B|HNRNPU	GO:0000381	61
6	GO Molecular Function	Telomeric DNA binding	2.26e-06	6	9.52381	HNRNPD|NCL|PURA|HNRNPA1|HNRNPA2B1|XRCC6	GO:0042162	37
7	GO Molecular Function	Double-stranded RNA binding	3.66e-06	7	11.1111	DHX15|ILF2|DHX9|ADAR|ELAVL1|ILF3|HNRNPU	GO:0003725	76
8	GO Biological Process	RNA transport	1.38e-05	8	12.6984	PABPN1|SRSF1|NPM1|SRSF7|HNRNPA1|HNRNPA2B1|DHX9|EIF4A3	GO:0050658	159
9	GO Biological Process	Activation of innate immune response	2.28e-05	6	9.52381	NONO|PRKDC|PSPC1|SFPQ|XRCC6|MATR3-2	GO:0002218	65
10	GO Biological Process	Chromosome organization	6.78e-05	15	23.8095	H4C6|TRIM28|LMNB1|NPM1|PRKDC|LMNB2|H1-10|PURA|HNRNPA2B1|SFPQ|XRCC6|PARP1|DHX9|HNRNPC|HNRNPU	GO:0051276	968
11	GO Molecular Function	snRNA binding	0.00023	5	7.93651	SNRPD3|SF3B3|EFTUD2|SNRNP70|HNRNPU	GO:0017069	47
12	GO Biological Process	Dendritic transport of messenger ribonucleoprotein complex	0.0003	3	4.7619	PURA|SFPQ|HNRNPU	GO:0098963	5
13	GO Biological Process	Positive regulation of mRNA splicing, via spliceosome	0.0004	4	6.34921	NCL|RBMX|TRA2B|SNRNP70	GO:0048026	26
14	GO Molecular Function	poly(A) binding	0.0006	4	6.34921	ELAVL4|SYNCRIP|HNRNPU|EIF4A3	GO:0008143	24
15	GO Biological Process	Negative regulation of telomere maintenance via telomere lengthening	0.00061	4	6.34921	HNRNPA1|PARP1|HNRNPC|HNRNPU	GO:1904357	30
16	GO Molecular Function	mRNA 3-UTR AU-rich region binding	0.00074	4	6.34921	HNRNPD|ELAVL4|ELAVL1|ILF3	GO:0035925	26
17	GO Molecular Function	pre-mRNA intronic binding	0.0041	3	4.7619	HNRNPL|HNRNPA2B1|ELAVL4	GO:0097157	13
18	GO Biological Process	ncRNA processing	0.0057	8	12.6984	NOP58|PRKDC|HNRNPA2B1|ADAR|NOP56|DDX17|RPS28|EIF4A3	GO:0034470	409
19	GO Biological Process	Regulation of mRNA stability involved in response to oxidative stress	0.0064	2	3.1746	MYEF2|HNRNPM	GO:2000815	2
20	GO Biological Process	Negative regulation of protein metabolic process	0.0103	12	19.0476	GLG1|NPM1|SF3B3|HNRNPD|PRKDC|NCL|PURA|ADAR|SYNCRIP|ILF3|SNRNP70|EIF4A3	GO:0051248	1038
21	GO Biological Process	Nuclear pore localization	0.0147	2	3.1746	LMNB1|LMNB2	GO:0051664	4
22	GO Molecular Function	Helicase activity	0.0268	5	7.93651	DHX15|XRCC6|DHX9|DDX17|EIF4A3	GO:0004386	149
23	GO Molecular Function	DNA topoisomerase binding	0.0272	2	3.1746	SRSF1|NCL	GO:0044547	4
24	GO Biological Process	Negative regulation of protein kinase activity by regulation of protein phosphorylation	0.0313	2	3.1746	NPM1|ADAR	GO:0044387	7
25	GO Biological Process	Regulation of oxidative stress-induced neuron intrinsic apoptotic signaling pathway	0.0437	2	3.1746	NONO|PARP1	GO:1903376	9
PPI enrichment p-value < 1.0E-16; redundancy cut-off = 0.25
Cytoscape 3.10.2 (September 2025)

## Sheet: Table 2b
Online Resource 2b Functional enrichment analysis of the 33 tangle-associated proteins significantly enriched uniquely in the PART group
Rank	Category	Description	FDR value	# Genes	Percentage in network	Genes	Term name	# Background genes
1	GO Molecular Function	Structural molecule activity	0.0019	10	30.303	PI3|NID1|TINAGL1|LAMB2|RPS15A|RPL3|RPL27A|RPS3A|SPRR1A|RPS14	GO:0005198	776
PPI enrichment p-value = 8.3E-3; redundancy cut-off = 0.25
Cytoscape 3.10.2 (September 2025)

## Sheet: Table 2c
Online Resource 2c Functional enrichment analysis of the 34 tangle-associated proteins significantly enriched in the intermediate AD group, but not in PART
Rank	Category	Description	FDR value	# Genes	Percentage in network	Genes	Term name	# Background genes
1	GO Molecular Function	RNA binding	3.01e-12	22	64.7059	FBL|RALY *|RBM39|ACIN1|NOVA2|SRRM2 *|SNRNP200|CPSF7|THRAP3|NTPCR|EIF3A *|STAU1|KTN1|RPSA *|RPS24|DDX39B *|ALYREF|RPS20 *|NOVA1|SART3|CELF2 *|RPS17 *	GO:0003723	1672
2	GO Biological Process	Cytoplasmic translation	0.0017	5	14.7059	EIF3A *|RPSA *|RPS24|RPS20 *|RPS17 *	GO:0002181	123
3	GO Biological Process	Regulation of alternative mRNA splicing, via spliceosome	0.0029	4	11.7647	NOVA2|THRAP3|NOVA1|CELF2 *	GO:0000381	61
PPI enrichment p-value = 2.1E-05; redundancy cut-off = 0.25
Cytoscape 3.10.2 (September 2025)

## Sheet: Table 2d
Online Resource 2d Functional enrichment analysis of the 66 tangle-associated proteins significantly enriched in the advanced AD group, but not in PART
Rank	Category	Description	FDR value	# Genes	Percentage in network	Genes	Term name	# Background genes
1	GO Biological Process	Cytoplasmic translation	5.57e-31	24	36.3636	RPL18A|RPL19|RPS3|RPL13|RPL4|RPL22|RPL12|EIF3A *|RPL5|RPS4X|RPL10A|RPS16|RPL13A|RPL14|RPS8|RPL31|RPSA *|RPL6|RACK1|RPS20 *|RPL18|RPL26|RPL9|RPS17 *	GO:0002181	123
2	GO Biological Process	Ribonucleoprotein complex assembly	1.69e-05	9	13.6364	CPSF6|SNRPD2|EIF3A *|RPL5|EIF6|RPSA *|RPL6|DDX39B *|CELF2 *	GO:0022618	203
3	GO Molecular Function	rRNA binding	0.0021	5	7.57576	RPS3|RPL12|RPL5|RPS4X|RPL9	GO:0019843	67
4	GO Biological Process	Regulation of protein metabolic process	0.0022	23	34.8485	LACRT|RPS3|GPD1L|HSP90B1|TMED10 *|HSPA5|RPL22|EPRS1|LMNA|EIF3A *|RPL5|RPS4X|EIF6|SERPINB5|RPL13A|XPO1|PSMD14|CAST|MACROH2A1|RACK1|RPS20 *|SERPINA3|RPL26	GO:0051246	2622
5	GO Biological Process	Nucleobase-containing compound metabolic process	0.0039	23	34.8485	RALY *|CPSF6|RPS3|FARSB|SRRM2 *|RBM14|SNRPD2|EPRS1|RPL5|PRPS1|RPL10A|EIF6|RPS16|TP53BP1|LARS1|RPL14|RPS8|PSMD14|DDX39B *|RPL26|CELF2 *|RPS17 *|PANK4	GO:0006139	2722
6	GO Biological Process	Protein folding in endoplasmic reticulum	0.0041	3	4.54545	CANX|HSP90B1|HSPA5	GO:0034975	11
7	GO Biological Process	Translational initiation	0.0373	4	6.06061	RPS3|EIF3A *|EIF6|RPS17 *	GO:0006413	75
8	GO Molecular Function	Ribosome binding	0.0415	4	6.06061	HSPA5|EIF6|RPSA *|RACK1	GO:0043022	68
9	GO Biological Process	Ribosomal small subunit biogenesis	0.0423	4	6.06061	RPS16|RPS8|RPSA *|RPS17 *	GO:0042274	78
PPI enrichment p-value < 1.0E-16; redundancy cut-off = 0.25
Cytoscape 3.10.2 (September 2025)
