# Supplementary material for: Proteomic remodelling of the neurofibrillary tangle from “PART” to advanced Alzheimer’s disease
Source: Research Square preprint supplement (doi:10.21203/rs.3.rs-8703254/v1), 2026-01-29
Supplement: Supplementary file 2 [file 50e34390fc46888f3cc5b795.xlsx]

## Sheet: Table 1
Online Resource 1 Proteomic dataset
Proteomic dataset corresponding to normalised label-free quantification intensity values after a log2-transformation (QuantityNorm). Pairwise comparisons were performed with a paired Student's t-test between “tangle” versus “non-tangle” samples, for each group (PART, intermediate AD and advanced AD). AD: Alzheimer's disease; ADV: advanced AD; INTER: intermediate AD
				Summary
				Group 1 PART			Group 2 Intermediate AD			Group 3 Advanced AD			Group 1 PART										Group 2 Intermediate AD												Group 3 Advanced AD
Gene ID	Protein ID	Uniprot ID	Names	-log10(p-value) '-Log Student's T-test p-value tangles_PART/non-tangles_PART	log2(fold change tangles/non-tangles) Student's T-test Difference tangles_PART/non-tangles_PART	Significantly enriched in tangles?	-log10(p-value) '-Log Student's T-test p-value tangles_INTER/non-tangles_INTER	log2(fold change tangles/non-tangles) Student's T-test Difference tangles_INTER/non-tangles_INTER	Significantly enriched in tangles?	-log10(p-value) '-Log Student's T-test p-value tangles_ADV/non-tangles_ADV	log2(fold change tangles/non-tangles) Student's T-test Difference tangles_ADV/non-tangles_ADV	Significantly enriched in tangles?	QuantityNorm Tangles_PART_Case#01	QuantityNorm Tangles_PART_Case#02	QuantityNorm Tangles_PART_Case#03	QuantityNorm Tangles_PART_Case#04	QuantityNorm Tangles_PART_Case#05	QuantityNorm Non-tangles_PART_Case#01	QuantityNorm Non-tangles_PART_Case#02	QuantityNorm Non-tangles_PART_Case#03	QuantityNorm Non-tangles_PART_Case#04	QuantityNorm Non-tangles_PART_Case#05	QuantityNorm Tangles_INTER_Case#07	QuantityNorm Tangles_INTER_Case#08	QuantityNorm Tangles_INTER_Case#09	QuantityNorm Tangles_INTER_Case#10	QuantityNorm Tangles_INTER_Case#11	QuantityNorm Tangles_INTER_Case#12	QuantityNorm Non-tangles_INTER_Case#07	QuantityNorm Non-tangles_INTER_Case#08	QuantityNorm Non-tangles_INTER_Case#09	QuantityNorm Non-tangles_INTER_Case#10	QuantityNorm Non-tangles_INTER_Case#11	QuantityNorm Non-tangles_INTER_Case#12	QuantityNorm Tangles_ADV_Case#13	QuantityNorm Tangles_ADV_Case#14	QuantityNorm Tangles_ADV_Case#15	QuantityNorm Tangles_ADV_Case#16	QuantityNorm Tangles_ADV_Case#17	QuantityNorm Tangles_ADV_Case#18	QuantityNorm Non-tangles_ADV_Case#13	QuantityNorm Non-tangles_ADV_Case#14	QuantityNorm Non-tangles_ADV_Case#15	QuantityNorm Non-tangles_ADV_Case#16	QuantityNorm Non-tangles_ADV_Case#17	QuantityNorm Non-tangles_ADV_Case#18
A2M	P01023	A2MG	Alpha-2-macroglobulin	1.19385	-0.415824	No	0.293827	0.162978	No	0.880027	0.267833	No	7.95708	7.70083	8.83206	8.74664	8.82836	8.7014	8.45606	9.25964	8.62027	9.10672	8.24019	8.49689	8.62853	9.24324	8.44996	8.24302	7.74897	7.55283	8.72956	8.78477	9.01035	8.49748	8.87657	8.78205	7.94628	8.52398	8.73607	8.37387	8.31323	9.05698	8.04058	8.01592	8.17061	8.0345
A2ML1	A8K2U0	A2ML1	Alpha-2-macroglobulin-like protein 1	0.00741759	-0.00879526	No	0.165515	-0.561043	No	0.584648	1.32376	No	NaN	6.6223	8.17672	8.99072	9.15955	7.71469	7.06511	8.79069	7.908	9.22066	8.6504	8.98436	6.31348	7.71839	6.19065	6.9947	NaN	5.86012	10.635	7.34139	8.53206	6.63821	7.76065	9.3112	6.93494	9.3012	8.4675	5.19416	7.81469	7.13991	NaN	6.15835	5.17544	7.12751
A4pept	P05067pept	A4peptide	Amyloid beta peptide	0	NaN	No	NaN	0	No	0	NaN	No	NaN	NaN	NaN	NaN	NaN	NaN	NaN	NaN	NaN	3.20445	NaN	NaN	NaN	NaN	NaN	NaN	NaN	NaN	NaN	NaN	NaN	NaN	NaN	NaN	NaN	NaN	NaN	9.99514	NaN	NaN	NaN	NaN	NaN	NaN
AAK1	Q2M2I8	AAK1	AP2-associated protein kinase 1	0.754741	-0.074613	No	0.191842	-0.052901	No	1.10182	-0.405825	No	9.66937	10.2376	9.67755	9.25439	10.1463	9.7552	10.302	9.79895	9.44249	10.0597	9.47587	8.90722	9.4134	9.84348	9.994	10.0762	9.66313	8.98501	9.21449	10.2818	9.71082	10.1722	8.70105	9.23804	8.89775	9.02665	9.45596	9.63966	9.11948	9.59966	10.0032	9.30216	10.0217	9.34782
AARS1	P49588	SYAC	Alanine--tRNA ligase, cytoplasmic	1.38957	-0.369511	No	1.19943	-0.131534	No	0.377256	-0.143131	No	8.3869	8.36304	8.65989	7.95063	8.26819	8.4479	8.64108	8.96023	8.76604	8.66097	8.00175	7.05499	8.23485	8.62798	8.11729	8.41222	8.1357	7.39853	8.17866	8.66914	8.2556	8.60064	8.06949	8.03049	7.35281	7.88278	8.22446	8.25286	8.15914	8.23686	8.2417	7.73691	8.27515	8.02192
AASDHPPT	Q9NRN7	ADPPT	L-aminoadipate-semialdehyde dehydrogenase-phosphopantetheinyl transferase	0	0.292338	No	0	0.0910568	No	0.625271	0.219277	No	5.25248	NaN	NaN	NaN	NaN	4.96014	5.41615	4.60694	5.38209	4.13001	NaN	NaN	NaN	5.80325	NaN	5.51106	NaN	NaN	NaN	NaN	NaN	5.42	NaN	4.97934	NaN	NaN	5.05694	4.72626	NaN	4.67444	4.81089	NaN	NaN	4.5926
AASS	Q9UDR5	AASS	Alpha-aminoadipic semialdehyde synthase, mitochondrial	1.71626	0.641803	Yes	0.881165	0.138956	No	0.287439	0.12646	No	7.16939	7.33393	6.66932	7.46696	6.66787	6.51251	6.58484	6.07507	6.33539	6.59065	7.38015	7.39753	7.27179	7.07901	7.24559	6.27306	7.40208	7.00542	7.06791	6.82542	7.11183	6.40074	7.55573	7.38855	7.32315	NaN	6.87385	7.13966	7.39791	6.78285	7.82163	7.47846	6.73222	6.91404
ABAT	P80404	GABT	4-aminobutyrate aminotransferase, mitochondrial	0.843311	-0.312796	No	0.446007	0.105406	No	0.221808	-0.0828573	No	7.05457	7.34367	7.50622	7.2424	7.37675	6.69546	7.91904	8.01186	7.74074	7.72048	7.13638	6.22246	7.50843	7.66652	7.48246	7.45088	7.25043	6.27181	7.10802	7.43378	7.12806	7.64259	7.15117	7.47357	6.82276	6.37607	6.60481	7.10806	7.04627	7.17574	6.69788	7.10406	6.82459	7.18503
ABCB1	P08183	MDR1	ATP-dependent translocase ABCB1	0	-0.00604773	No	0.0680847	0.177454	No	0	-0.760478	No	NaN	NaN	6.25532	NaN	NaN	6.75965	6.05258	6.26137	6.01024	5.74718	NaN	NaN	6.31725	6.04925	NaN	5.76636	6.49381	NaN	5.37475	NaN	5.97364	6.35395	NaN	5.6496	NaN	NaN	6.1035	NaN	NaN	6.41008	6.05204	NaN	NaN	NaN
ABCF1	Q8NE71	ABCF1	ATP-binding cassette sub-family F member 1	0.297889	0.261222	No	0.528723	0.535481	No	NaN	0	No	5.69418	NaN	5.07947	5.75138	5.6703	NaN	5.94694	NaN	5.75438	5.14486	5.90257	NaN	5.92645	NaN	NaN	6.00461	NaN	NaN	5.12236	NaN	NaN	5.73773	NaN	NaN	NaN	NaN	NaN	NaN	NaN	NaN	NaN	NaN	NaN	NaN
ABHD10	Q9NUJ1	ABHDA	Palmitoyl-protein thioesterase ABHD10, mitochondrial	0.0102183	-0.0101798	No	0.75094	0.363967	No	0.46365	0.351356	No	6.42935	6.38607	6.78383	6.42325	5.87102	5.19182	6.90699	6.72203	6.88833	6.23525	6.75964	5.75946	6.82224	6.79705	6.64281	6.07071	6.14639	6.08548	5.9034	6.31225	5.79383	6.42677	6.05319	6.63081	NaN	6.47358	6.18955	5.94061	6.44029	5.15353	6.5339	5.97045	5.82105	6.14564
ABHD11	Q8NFV4	ABHDB	Protein ABHD11	0	0.891596	No	1.18648	-0.417552	No	0	NaN	No	4.78353	NaN	NaN	NaN	4.97959	NaN	3.64063	5.604	5.06636	4.088	NaN	NaN	4.52123	5.26111	4.60301	5.11356	NaN	NaN	4.54102	5.82486	5.29848	5.50477	NaN	NaN	NaN	NaN	NaN	NaN	5.81826	3.38627	NaN	NaN	5.26827	NaN
ABHD16A	O95870	ABHGA	Phosphatidylserine lipase ABHD16A	0	NaN	No	0	NaN	No	NaN	0	No	NaN	NaN	NaN	NaN	5.02202	NaN	NaN	NaN	5.1037	NaN	NaN	NaN	NaN	NaN	NaN	NaN	NaN	NaN	NaN	NaN	NaN	10.7904	NaN	NaN	NaN	NaN	NaN	NaN	NaN	NaN	NaN	NaN	NaN	NaN
ABI1	Q8IZP0	ABI1	Abl interactor 1	0.250397	-0.107561	No	0.434489	-0.162563	No	0.248384	-0.107779	No	9.30562	9.46366	9.73745	8.90175	9.41755	9.59313	9.1735	9.42227	9.38085	9.79411	8.7548	8.25357	8.73252	9.04793	9.57624	9.33932	8.97214	8.0062	9.16231	9.78099	9.24768	9.51043	9.31493	8.66422	8.89112	8.25365	9.21317	9.32746	9.13247	9.18751	9.07085	NaN	9.61522	8.94373
ABI2	Q9NYB9	ABI2	Abl interactor 2	0.278256	0.195657	No	1.41922	-0.212758	No	0.0978665	-0.069276	No	7.73051	8.61606	8.56508	8.73678	8.44701	6.44519	8.90014	8.37969	8.82201	8.57013	7.45511	NaN	7.92448	8.46484	8.18294	8.89364	7.844	NaN	7.91711	8.60962	8.51106	9.10302	7.96673	7.0907	7.57715	6.47559	8.69241	8.56092	7.39629	7.86117	8.1278	NaN	8.43454	8.4145
ABL2	P42684	ABL2	Tyrosine-protein kinase ABL2	0.245528	-0.339299	No	0.680109	-0.529953	No	0.320715	-0.206728	No	5.8103	3.63649	5.45255	6.04815	5.54176	5.07476	6.05198	5.64831	5.72011	5.69056	5.20601	NaN	3.56654	5.45779	5.56891	5.23883	5.23874	NaN	5.50257	5.70276	5.72279	5.52098	5.55891	NaN	NaN	NaN	6.02404	NaN	5.57282	5.78307	NaN	NaN	6.42358	NaN
ABLIM1	O14639	ABLM1	Actin-binding LIM protein 1	0.548275	-0.301274	No	0.884022	-0.362826	No	0.165472	-0.15962	No	NaN	5.93516	6.25282	5.7565	5.33155	NaN	5.9278	6.33037	5.90412	6.31885	5.34278	NaN	NaN	6.23122	5.60599	6.23079	5.73951	NaN	6.10956	6.50985	6.41835	6.19437	NaN	5.89636	NaN	NaN	6.02279	6.45018	5.79612	6.10841	NaN	NaN	6.73967	6.00011
ABLIM2	Q6H8Q1	ABLM2	Actin-binding LIM protein 2	0.393159	-0.0892654	No	0.139166	-0.0899545	No	0.792561	-0.310125	No	6.51222	7.60887	7.13323	6.70696	7.23094	6.3352	7.65892	7.10675	7.07461	7.46308	6.2331	NaN	6.9473	7.21056	6.70393	7.42731	7.06422	6.38724	6.51434	7.63128	6.3458	7.41634	5.84724	6.94044	NaN	6.58408	6.52888	6.46422	6.55203	6.94142	6.5008	NaN	6.99846	6.52937
ABR	Q12979	ABR	Active breakpoint cluster region-related protein	1.00495	-0.54294	No	0.554211	-0.331285	No	1.11846	-0.846157	No	6.11654	4.78587	5.72159	5.32771	5.52804	6.06972	6.21701	6.09336	5.57155	6.24281	NaN	NaN	5.55202	4.87578	NaN	5.21717	5.43883	NaN	5.94004	5.56567	5.29206	5.13312	5.29881	4.8586	NaN	4.25729	5.01663	4.67741	NaN	5.80642	4.81269	NaN	NaN	5.4219
ABRAXAS2	Q15018	ABRX2	BRISC complex subunit Abraxas 2	0.167885	-0.488888	No	0	0.475768	No	0	-0.355719	No	NaN	NaN	3.97534	5.74371	5.45902	5.02068	NaN	5.35148	NaN	5.06066	NaN	NaN	NaN	NaN	NaN	5.10812	NaN	NaN	5.73753	NaN	NaN	4.63235	NaN	5.04046	NaN	NaN	NaN	NaN	NaN	5.39618	NaN	NaN	NaN	NaN
ACAA1	P09110	THIK	3-ketoacyl-CoA thiolase, peroxisomal	0.970245	0.155166	No	0.157116	-0.172116	No	0	-0.0931439	No	NaN	NaN	7.52745	6.64833	6.9655	6.86067	7.33275	7.2656	6.57193	6.83825	5.69988	NaN	NaN	6.96851	NaN	7.07536	NaN	NaN	7.1292	7.4738	6.94268	6.9143	7.04289	5.73267	NaN	NaN	NaN	NaN	7.13603	NaN	NaN	NaN	NaN	NaN
ACAA2	P42765	THIM	3-ketoacyl-CoA thiolase, mitochondrial	0.142051	-0.114003	No	0.635271	0.329317	No	0.936085	0.656984	No	7.20323	6.17244	4.80166	6.03823	5.85122	6.87969	5.79697	5.95164	5.73764	6.27086	6.76325	NaN	NaN	6.45857	5.8892	6.03058	5.97167	NaN	5.47634	5.84531	5.99983	6.00752	6.83693	6.48136	NaN	6.553	5.66444	NaN	6.29142	5.35454	NaN	6.25437	NaN	NaN
ACACA	Q13085	ACACA	Acetyl-CoA carboxylase 1	2.06187	-0.662126	No	3.2574	-0.233721	No	0.181853	-0.21477	No	6.64677	6.009	6.39762	6.46947	6.53064	6.77103	6.8684	7.26856	7.17925	7.2769	6.43613	NaN	6.63524	7.09142	6.56735	6.76061	6.65006	5.84361	6.86891	7.25033	6.83493	7.05514	6.5092	6.89562	NaN	6.51165	6.48168	5.04676	6.29504	6.3299	5.48098	6.59555	6.28575	7.01251
ACAD8	Q9UKU7	ACAD8	Isobutyryl-CoA dehydrogenase, mitochondrial	0.487119	-0.239478	No	0.50575	-0.119819	No	0.134646	0.0629146	No	8.3719	8.15336	8.30733	7.97628	7.78358	7.83506	8.74282	8.70154	8.60634	7.90409	7.73452	7.27871	7.62628	8.1825	7.8683	8.14972	7.85086	7.49069	7.9227	7.89633	8.30996	8.0884	8.19503	7.98628	7.14689	7.48412	7.76554	8.01408	8.06843	7.36072	7.53142	7.22718	8.2681	7.75861
ACADM	P11310	ACADM	Medium-chain specific acyl-CoA dehydrogenase, mitochondrial	0.0960076	-0.292812	No	0.237206	0.161402	No	0.188285	-0.624089	No	NaN	NaN	4.6842	4.43445	6.5111	4.45617	5.08236	4.98285	6.49656	5.02878	6.05814	NaN	6.29686	5.83209	6.24963	6.20057	6.23396	NaN	5.97407	4.70088	6.34664	6.57473	4.38267	6.42767	NaN	NaN	5.1168	NaN	6.01878	6.03974	NaN	NaN	NaN	6.41796
ACADVL	P49748	ACADV	Very long-chain specific acyl-CoA dehydrogenase, mitochondrial	1.06418	-0.514266	No	0.0121125	0.00671347	No	0.171182	-0.0714785	No	6.69134	5.62416	6.32196	6.10535	5.48717	6.57896	6.67046	6.71835	6.32625	6.50729	6.59168	6.55013	5.89695	6.18321	5.7433	5.06422	6.51009	6.29488	6.13975	5.43283	6.22539	5.38627	6.95208	6.10648	5.69564	6.15087	5.94555	6.41893	6.67441	6.51279	6.1679	6.1502	NaN	6.17608
ACAN	P16112	PGCA	Aggrecan core protein	0.0464593	0.0130801	No	0.23571	0.130814	No	0	-0.338564	No	NaN	NaN	5.55787	NaN	5.24763	NaN	4.96263	5.62617	5.71686	5.15317	6.83825	NaN	5.67072	5.15417	5.72376	5.60347	6.12086	NaN	5.88661	5.63986	5.26855	5.42042	NaN	NaN	NaN	5.08692	NaN	NaN	5.91235	5.90846	6.18075	5.42548	NaN	NaN
ACAT1	P24752	THIL	Acetyl-CoA acetyltransferase, mitochondrial	1.74005	-0.368551	No	0.820622	-0.214227	No	0.297052	0.0907815	No	9.01265	9.49069	10.052	8.84244	9.83235	9.6387	9.68283	10.3035	9.41719	10.0307	8.49633	8.60433	9.2357	9.18038	9.29701	9.52384	8.79132	9.24866	9.19635	8.94361	9.6404	9.80261	9.54191	9.35281	8.12028	8.68497	8.99228	9.17365	9.68524	9.12164	8.32926	8.05322	8.90109	9.23075
ACAT2	Q9BWD1	THIC	Acetyl-CoA acetyltransferase, cytosolic	1.22179	-0.385109	No	0.787775	-0.162206	No	0.0897128	-0.0376535	No	8.43804	8.84382	8.90088	8.97726	8.35742	9.26531	9.28755	8.85199	9.17239	8.86573	8.39464	8.24733	8.59992	9.17484	8.55007	8.99207	8.64102	8.13027	9.07071	9.31855	8.8995	8.87206	7.81285	8.46163	7.52762	8.15825	7.99387	7.81038	7.81118	8.35085	8.23374	8.33297	7.78076	7.48103
ACBD7	Q8N6N7	ACBD7	Acyl-CoA-binding domain-containing protein 7	0.105151	-0.404282	No	0.988556	-0.723933	No	0.503666	-0.657223	No	5.52523	6.79093	3.16427	6.10213	6.0587	NaN	5.69097	6.15361	5.4256	NaN	5.4419	NaN	5.7505	5.50181	5.56844	4.98259	6.38228	NaN	5.66454	6.14488	NaN	6.38083	5.21628	5.4584	6.71851	3.62639	5.13764	5.20035	5.16811	6.10088	6.55373	5.82575	NaN	NaN
ACIN1	Q9UKV3	ACINU	Apoptotic chromatin condensation inducer in the nucleus	0	1.71005	No	2.49757	1.79455	Yes	0	3.38646	No	7.63825	6.31201	6.35654	5.93453	5.09129	NaN	4.60196	NaN	NaN	NaN	7.13479	6.58078	6.43477	7.08484	NaN	6.78252	NaN	NaN	NaN	5.29926	NaN	4.979	7.59967	7.98687	NaN	7.82485	6.61217	NaN	NaN	4.60041	NaN	NaN	NaN	NaN
ACLY	P53396	ACLY	ATP-citrate synthase	1.58027	-0.325084	No	0.992093	-0.189109	No	0.58642	-0.141221	No	7.09605	7.6651	7.35167	7.122	7.41125	7.25967	8.09104	7.6488	7.7537	7.5183	7.12218	6.14613	6.95431	7.68421	7.40587	7.67379	6.99672	6.72127	7.23521	7.86118	7.52407	7.78269	7.01549	7.02337	6.61717	7.03325	7.36898	6.78321	7.39755	7.20606	6.98627	6.7014	7.6208	6.77672
ACO2	Q99798	ACON	Aconitate hydratase, mitochondrial	1.67621	-0.418845	No	0.986619	-0.108363	No	0.525148	-0.122305	No	12.2185	12.2448	12.7695	12.0862	12.7893	12.593	12.9212	12.9938	12.7713	12.9233	11.4985	10.8312	12.1153	12.2589	12.5047	12.4621	11.841	10.886	12.0515	12.3765	12.5787	12.5872	12.3985	12.2477	11.2718	11.0008	11.7316	12.1781	12.5542	12.2014	11.8327	11.0763	11.9211	11.9766
ACOT1	Q86TX2	ACOT1	Acyl-coenzyme A thioesterase 1	0.171452	-0.101981	No	0.203185	-0.0535204	No	0.321794	-0.196806	No	8.58234	8.86949	8.36752	7.80133	8.24417	7.81402	9.12191	8.74511	8.29502	8.39871	8.22631	7.66061	8.29311	8.42179	8.6347	8.88264	8.56748	7.8099	8.05056	8.65781	8.36546	8.98909	8.23898	8.31986	8.18051	NaN	8.27372	9.45912	8.5779	8.29117	9.09431	7.74111	8.64012	8.85272
ACOT7	O00154-4	BACH	Cytosolic acyl coenzyme A thioester hydrolase	1.91254	-0.3626	No	0.828485	-0.149818	No	0.641835	-0.188665	No	10.5837	11.05	11.1205	10.8419	10.736	10.9187	11.5778	11.3654	11.4152	10.868	10.3821	10.0015	10.8737	11.1824	10.7264	11.1318	10.8005	10.2681	10.8285	11.1272	11.0639	11.1085	10.3034	10.1833	10.0537	9.90346	10.5836	10.5599	10.4826	10.0994	10.7665	10.3693	10.566	10.4355
ACOT9	Q9Y305	ACOT9	Acyl-coenzyme A thioesterase 9, mitochondrial	1.64871	-0.51551	No	2.24875	-0.348991	No	0.61374	-0.262795	No	8.17821	7.39822	7.99085	7.5335	7.77796	8.39287	8.37561	8.38093	8.23914	8.06773	7.53773	7.17875	7.4302	8.02612	7.36568	8.17187	7.98043	7.6724	7.8303	8.05486	7.86132	8.40499	7.95499	8.09831	7.02977	7.53516	7.39516	7.88737	7.75006	7.96746	8.15888	7.87245	7.77987	7.94882
ACP1	P24666	PPAC	Low molecular weight phosphotyrosine protein phosphatase	1.86483	-0.60898	No	1.25391	-0.446131	No	0.725798	-0.186448	No	6.94085	7.54309	8.16891	7.78336	8.64773	8.07586	8.01324	8.8177	8.3032	8.91884	7.2118	NaN	7.96426	7.99969	7.69758	8.22771	7.75962	NaN	8.11943	8.03698	8.68445	8.73121	8.08112	7.56457	7.12359	NaN	7.90001	7.6734	8.29486	7.80129	7.69859	NaN	7.77072	7.70946
ACP2	P11117	PPAL	Lysosomal acid phosphatase	0.00653696	0.00448179	No	1.46939	0.469268	No	0	NaN	No	6.40314	NaN	4.73784	4.93836	4.20451	NaN	3.05744	4.92431	4.74293	NaN	5.58953	NaN	5.97664	6.08184	5.95824	6.09628	NaN	NaN	NaN	5.46071	5.48544	5.7824	NaN	NaN	NaN	NaN	6.27343	NaN	NaN	NaN	NaN	NaN	NaN	NaN
ACP3	P15309	PPAP	Prostatic acid phosphatase	0	NaN	No	0	NaN	No	NaN	0	No	NaN	NaN	4.51887	NaN	NaN	NaN	NaN	NaN	4.36486	5.77042	NaN	NaN	NaN	6.38205	NaN	NaN	NaN	NaN	NaN	NaN	NaN	NaN	NaN	NaN	NaN	NaN	NaN	NaN	NaN	NaN	NaN	NaN	NaN	NaN
ACSL1	P33121	ACSL1	Long-chain-fatty-acid--CoA ligase 1	0.559125	0.769689	No	0.402584	-0.328408	No	0	NaN	No	6.38838	NaN	6.3452	7.07712	8.04757	4.40614	8.25695	6.39985	7.45068	6.52285	NaN	NaN	NaN	7.47757	7.41947	7.43192	6.97591	NaN	7.80164	8.20451	7.95131	7.15835	7.28315	NaN	NaN	NaN	NaN	NaN	NaN	6.92057	NaN	NaN	NaN	NaN
ACSL6	Q9UKU0	ACSL6	Long-chain-fatty-acid--CoA ligase 6	0.00997355	0.013924	No	0.167695	0.329107	No	0	-0.981674	No	6.1202	NaN	4.05217	6.10117	6.12144	6.36526	5.42949	4.6393	4.75172	6.58301	NaN	NaN	NaN	6.43864	NaN	5.60787	NaN	NaN	5.18046	5.5116	NaN	5.87669	4.33522	5.63029	NaN	NaN	NaN	NaN	5.3169	NaN	NaN	NaN	NaN	5.27297
ACTA2	P62736	ACTA	Actin, aortic smooth muscle	1.41597	-0.502218	No	0.998488	-0.643987	No	0.177835	-0.0567327	No	11.1808	11.6989	11.0103	11.6937	12.2288	11.6483	12.1846	12.1166	12.0343	12.3398	9.43721	9.00953	11.561	11.8693	11.4064	11.9192	11.1159	10.572	11.6849	11.7213	11.8955	12.0771	11.6092	11.739	10.8657	10.4515	11.2799	11.0425	11.5272	11.471	11.4357	10.3775	11.2265	11.2903
ACTB	P60709	ACTB	Actin, cytoplasmic 1	0.671717	-0.0992485	No	0.510649	-0.0588684	No	0.424805	-0.070075	No	14.2065	14.519	14.5787	14.267	14.2932	14.3805	14.588	14.4722	14.5655	14.3546	13.8143	13.2521	13.9526	14.2116	14.2866	14.1856	13.9687	13.2846	14.179	14.2779	14.1421	14.2037	14.1348	13.9424	13.5502	13.3728	13.6772	13.7476	14.1758	13.9555	13.9704	13.4091	13.6629	13.6719
ACTBL2	Q562R1	ACTBL	Beta-actin-like protein 2	0.0529431	0.0293064	No	0.134372	-0.0572805	No	1.39943	-0.556495	No	15.7562	16.281	15.5762	15.7639	15.1034	16.0552	15.5389	15.5575	15.779	15.4036	15.8999	NaN	15.904	16.1293	15.8965	16.1496	15.8867	NaN	15.5693	16.7365	16.03	16.043	15.1396	15.1286	NaN	13.8768	15.1961	15.6497	15.5924	15.5099	15.37	15.037	15.9282	15.7058
ACTG1	P63261	ACTG	Actin, cytoplasmic 2	0.822019	0.386357	No	0.216158	0.114895	No	0.110661	-0.122218	No	10.8602	11.7216	10.1465	10.2691	10.0642	10.5789	10.6149	9.63062	10.0061	10.2993	10.4949	9.2777	9.96369	9.89657	10.8187	10.9498	9.96832	9.60169	10.1085	10.2867	9.90442	10.8424	9.83686	9.51554	9.60404	9.88823	9.99307	10.7446	9.49172	9.76005	10.7957	10.2843	10.8358	9.14818
ACTN1	P12814-3	ACTN1	Alpha-actinin-1	1.33383	-0.374664	No	2.21787	-0.218103	No	0.953494	-0.19889	No	10.0416	10.4369	10.955	10.3359	10.2399	10.4453	11.1563	10.9656	10.9215	10.3939	9.60559	9.54299	10.3289	10.5751	10.3457	10.5135	9.98575	9.74009	10.4037	10.8495	10.6282	10.6131	9.96191	9.60469	9.44009	9.40583	10.044	9.65185	9.9835	9.77239	10.0856	9.71738	9.98981	9.75304
ACTN2	P35609-2	ACTN2	Alpha-actinin-2	1.02733	-0.357629	No	1.77081	-0.23762	No	1.62774	-0.204722	No	7.72521	7.99413	7.70971	7.69066	7.94704	7.56299	8.5862	8.17939	8.43624	8.09009	7.19213	6.96555	7.36324	8.16905	8.0369	7.74231	7.71673	7.12681	7.50469	8.21577	8.31711	8.0138	7.21702	7.232	6.98997	7.03316	7.78867	6.84601	7.37568	7.17328	7.25722	7.25806	8.00682	7.26411
ACTN4	O43707	ACTN4	Alpha-actinin-4	0.359329	-0.0955744	No	0.425308	-0.331899	No	0.194526	0.0447777	No	7.17598	7.19315	7.26507	7.48528	7.36092	7.01767	7.52107	7.44348	7.30673	7.66932	6.90011	7.11786	6.91497	7.51434	7.10346	7.29503	6.71499	6.64429	8.80627	7.51879	7.61623	7.5366	6.96887	7.53627	6.92031	6.71174	7.33442	6.78152	7.1962	7.27235	6.77996	6.55511	7.15958	7.02127
ACTR1A	P61163	ACTZ	Alpha-centractin	0.00413231	-0.00456028	No	1.5197	-0.310559	No	0.268048	0.0967199	No	7.57665	8.30967	8.76681	7.97443	8.81974	6.19049	8.6639	9.03525	8.66813	8.91234	7.69722	6.40777	7.73725	7.8185	8.26193	8.15889	7.92658	6.92958	8.35285	8.06334	8.15819	8.51437	8.21532	7.67064	NaN	6.72088	7.22186	7.61822	8.24786	7.54293	7.03767	6.24708	7.59457	7.33087
ACTR2	P61160	ARP2	Actin-related protein 2	0.991008	-0.378363	No	1.21452	-0.170456	No	0.464674	-0.143194	No	8.28808	8.65578	8.99021	8.27527	8.52189	8.48391	9.25689	8.9331	9.23225	8.71689	8.31281	7.97667	8.63931	8.59494	8.28313	8.74929	8.70809	7.93708	8.82886	8.90392	8.47047	8.73046	8.2521	8.23674	7.87182	7.44416	7.99106	8.20911	8.25127	7.99593	8.62261	7.55255	8.21554	8.22625
ACTR3	P61158	ARP3	Actin-related protein 3	1.20463	-0.335227	No	0.7421	-0.151513	No	0.693674	-0.270422	No	8.49106	8.56162	8.85114	8.52236	8.70289	8.8452	9.03452	8.85602	9.25954	8.80991	8.55314	8.02665	8.59435	8.75923	8.69326	8.51001	8.59791	7.9584	8.91056	8.99804	8.57521	9.00559	8.3229	8.24995	7.62399	7.85052	8.23005	8.48227	8.58115	8.18478	8.69311	8.12806	8.55834	8.23676
ACTR3B	Q9P1U1	ARP3B	Actin-related protein 3B	0.841148	-0.419364	No	1.11312	-0.337189	No	0.587703	-0.259691	No	9.32138	9.35246	9.4586	8.75037	8.76608	9.274	9.82896	9.36838	9.91887	9.35549	8.49304	8.17135	9.28258	9.24967	9.48609	9.31189	9.32994	8.8785	9.25597	9.62987	9.44814	9.47532	8.72344	8.46428	8.21105	8.72458	9.11943	9.23636	8.96699	8.87643	9.2248	8.41234	9.59073	8.96601
ACY1	Q03154	ACY1	Aminoacylase-1	0.409467	-0.102016	No	0.218431	-0.119089	No	0.0257131	0.0152321	No	6.22704	6.57038	6.44647	6.73938	6.50776	6.32141	6.87758	6.57329	7.00985	6.21899	7.12239	6.17805	6.74718	6.35271	7.01262	6.41718	6.47266	NaN	6.84453	6.9408	7.15454	6.83501	6.60777	6.42475	6.59715	5.81696	6.27205	7.06044	6.08353	6.75583	5.86981	6.04005	6.75637	7.18215
ACYP1	P07311	ACYP1	Acylphosphatase-1	0.196129	-0.0903573	No	0.137201	0.062783	No	1.24493	0.860364	No	6.52192	5.79746	6.65751	6.54914	6.58408	6.22662	5.88385	6.39755	7.21124	6.84264	6.75112	6.46473	6.74301	6.66092	7.16087	6.1816	6.58312	NaN	6.91464	6.91913	6.48513	6.28158	6.42607	5.8505	NaN	5.96243	6.65654	NaN	5.81521	4.5632	5.7665	NaN	5.97361	NaN
ACYP2	P14621	ACYP2	Acylphosphatase-2	0.551653	0.25483	No	0.515057	-0.217195	No	0.830884	-0.355079	No	9.09567	9.4196	9.00717	8.07714	8.92251	8.28576	9.35087	8.59817	8.49207	8.52107	9.05241	7.4594	8.69302	8.3085	9.0299	9.17499	8.78773	8.43991	8.73775	8.74786	8.81909	9.48903	8.83872	9.30104	8.8442	7.96469	8.70891	9.5408	9.13293	10.2305	9.6622	8.03815	9.17596	9.08905
ADAM22	Q9P0K1	ADA22	Disintegrin and metalloproteinase domain-containing protein 22	1.43659	-0.495196	No	0.992354	-0.455486	No	0.347908	-0.160027	No	5.85906	5.56652	6.46626	6.51556	5.83199	6.06947	6.67039	6.78837	6.8331	6.35404	5.39282	5.20443	5.76103	6.43986	5.64081	6.16855	5.77073	6.38879	6.26002	5.93796	6.40622	6.5767	5.65018	4.92159	5.95968	NaN	5.77583	5.85292	5.67398	5.83408	6.01783	NaN	5.69753	5.73692
ADAM23	O75077	ADA23	Disintegrin and metalloproteinase domain-containing protein 23	0.379809	-0.318925	No	0.0120936	-0.0144358	No	0	-0.351369	No	6.25792	6.18565	6.39023	6.51773	6.09109	5.34948	6.19949	6.98525	7.57342	6.9296	NaN	NaN	6.55271	6.93769	NaN	6.07588	NaN	NaN	5.87401	7.06666	6.48749	6.66891	5.81052	NaN	NaN	NaN	5.88363	4.91523	NaN	5.4593	6.26378	NaN	6.235	NaN
ADAR	P55265	DSRAD	Double-stranded RNA-specific adenosine deaminase	3.91314	2.28797	Yes	2.89747	1.65613	Yes	2.39775	2.09447	Yes	7.34148	7.99918	7.98496	6.75049	7.03767	5.45357	5.47064	5.35237	4.80584	4.59153	7.68543	7.44622	7.40253	7.74868	6.95532	7.68015	NaN	5.98762	5.01328	6.12816	5.80857	6.0146	7.80666	7.70588	6.63212	7.08779	8.24523	7.4493	4.44346	6.07377	5.86508	3.85996	6.18804	5.92988
ADD1	P35611	ADDA	Alpha-adducin	1.79876	-0.306209	No	1.98837	-0.32193	No	1.26882	-0.375946	No	9.61801	10.1708	10.0095	9.8127	10.3626	10.1805	10.5054	10.3171	10.0422	10.4595	9.58622	8.9042	9.79495	9.86732	9.88747	10.3355	10.0148	9.47357	9.86607	10.1756	10.0001	10.7771	9.69495	9.52913	9.28526	9.07698	9.84764	10.0944	10.1278	10.3488	9.80204	9.26303	10.3948	9.84757
ADD2	P35612	ADDB	Beta-adducin	1.24274	-0.239148	No	1.64364	-0.257772	No	1.98431	-0.413571	No	9.0118	9.37426	9.32337	8.98383	9.18646	9.31833	9.69566	9.40453	9.47916	9.1778	8.61908	8.16687	9.04426	9.13152	8.73101	9.44496	8.99123	8.51925	8.91906	9.46558	9.10668	9.68254	8.56615	8.5848	8.60117	8.34125	8.8374	9.03218	9.07438	8.88049	9.32125	8.55235	9.49371	9.12221
ADD3	Q9UEY8	ADDG	Gamma-adducin	1.19368	-0.133676	No	0.117757	-0.0268832	No	1.26252	-0.491913	No	7.95113	8.10274	8.09554	7.95724	8.02366	8.23091	8.31248	8.22571	7.93484	8.09475	8.18091	7.4313	7.82223	8.02937	8.32177	8.29603	8.16936	7.73782	7.74294	8.12353	8.02738	8.44188	7.99218	8.09717	7.28813	7.40173	7.79812	8.67056	8.47086	8.88833	8.23722	7.59669	8.64875	8.35753
ADGRB2	O60241	AGRB2	Adhesion G protein-coupled receptor B2	0.302049	-0.695204	No	0.406056	-0.241005	No	0	0.608968	No	NaN	3.57847	6.15501	5.70251	5.9626	NaN	6.86304	5.24158	6.1084	5.96641	4.71294	5.18368	5.68615	5.72737	5.81633	5.44605	6.00222	4.94044	5.9472	5.73881	5.35911	6.03077	NaN	6.26135	NaN	NaN	5.72477	5.37871	NaN	NaN	4.82	NaN	5.1158	NaN
ADGRB3	O60242	AGRB3	Adhesion G protein-coupled receptor B3	0.210478	-0.641392	No	0.592123	-2.36237	No	NaN	0	No	NaN	NaN	1.3596	4.33859	4.31753	NaN	4.24843	4.15102	4.21953	3.56934	NaN	NaN	NaN	1.02931	NaN	2.50504	NaN	NaN	NaN	4.39546	4.78134	3.86363	NaN	NaN	NaN	NaN	NaN	NaN	NaN	NaN	NaN	NaN	NaN	NaN
ADGRL1	O94910	AGRL1	Adhesion G protein-coupled receptor L1	0.495906	-0.250212	No	0.826552	-0.181209	No	0.421734	-0.137041	No	6.8624	7.95928	7.48623	7.28868	7.05958	7.82432	7.76975	7.2425	7.62825	7.4424	6.79268	6.73357	7.07359	7.39326	7.42179	7.53909	7.00886	7.16906	6.86197	7.84475	7.39296	7.76364	7.04462	6.78	6.60483	6.6375	7.26369	6.80681	6.88726	6.59116	7.23579	6.95028	7.63638	6.65882
ADGRL3	Q9HAR2	AGRL3	Adhesion G protein-coupled receptor L3	0.134106	-0.392881	No	0.0792411	0.123371	No	0	NaN	No	6.72821	5.65847	NaN	NaN	6.43748	5.32197	7.73917	NaN	7.81359	6.94166	6.57024	NaN	NaN	7.57187	7.82081	NaN	NaN	NaN	NaN	7.90859	7.23735	7.05441	NaN	4.69437	NaN	NaN	NaN	NaN	NaN	NaN	NaN	NaN	7.62965	NaN
ADH5	P11766	ADHX	Alcohol dehydrogenase class-3	0.288129	-0.23934	No	0.477239	0.22133	No	0.0408826	-0.0389773	No	6.89438	5.20883	6.97022	6.51617	5.82317	5.93876	6.31098	7.22212	6.79651	6.34111	7.03845	NaN	6.67107	7.0924	6.24777	6.26509	6.94213	NaN	6.06477	6.32425	6.32492	6.55206	6.88268	6.05434	6.39409	6.27264	NaN	5.95233	6.0755	6.0905	7.11841	NaN	5.83251	6.15493
ADH7	P40394	ADH7	All-trans-retinol dehydrogenase	0.215853	0.203467	No	0	0.537822	No	0.0780351	0.229307	No	NaN	NaN	3.71136	4.81542	4.95562	5.8761	NaN	4.1838	4.28317	4.40502	NaN	4.06162	NaN	4.91145	NaN	3.78166	NaN	NaN	7.24377	4.37363	4.6475	NaN	4.70707	5.98613	NaN	NaN	5.71116	NaN	5.34554	4.88904	NaN	NaN	NaN	4.98675
ADPRS	Q9NX46	ADPRS	ADP-ribosylhydrolase ARH3	0.485762	0.172851	No	0.0475706	0.0172071	No	0.318475	-0.190037	No	6.46717	6.97339	6.54068	6.37249	6.38981	6.36346	6.26555	6.39538	6.63279	6.22209	6.34187	5.98553	6.18095	6.86436	6.7501	6.65812	6.04629	6.20008	6.6214	6.90762	6.40593	6.49639	6.00133	6.06907	5.40206	6.43362	6.18874	6.58552	6.05399	6.06626	6.42448	NaN	6.52769	6.12449
ADRM1	Q16186	ADRM1	Proteasomal ubiquitin receptor ADRM1	0.924782	0.595017	No	0.564416	0.0889866	No	0.211532	-0.107191	No	9.0423	10.3004	9.35092	8.83801	8.82423	7.42967	9.75171	8.57234	8.63411	8.99294	9.0979	8.41732	9.01114	9.52061	8.89189	9.22637	8.95645	8.5224	8.67341	9.65041	8.75285	9.07579	8.08573	8.43451	8.02636	8.21698	8.84908	9.01923	8.42127	8.54493	8.84752	8.02655	9.04209	8.39267
ADSS2	P30520	PURA2	Adenylosuccinate synthetase isozyme 2	0.132021	-0.175377	No	0.901258	0.712795	No	0	NaN	No	NaN	5.64324	NaN	NaN	7.22741	NaN	6.22019	7.09855	6.84975	7.0012	NaN	NaN	NaN	7.24562	NaN	6.33846	NaN	NaN	NaN	6.39043	NaN	5.76806	NaN	NaN	NaN	NaN	NaN	NaN	7.02472	NaN	NaN	5.77036	NaN	NaN
AFDN	P55196	AFAD	Afadin	0.0397365	-0.0119584	No	0.772056	-0.28042	No	2.13853	-0.289196	No	7.10172	7.70704	7.13967	7.06639	6.99449	6.94744	7.48113	7.2744	7.03144	7.33471	6.98846	6.46677	7.08734	7.67739	7.42929	7.67169	6.92809	7.40447	7.68983	7.58577	7.78618	7.60911	6.98468	7.05577	7.20376	NaN	7.07931	6.97373	7.29276	7.24731	7.50787	7.16759	7.56419	7.13111
AFG3L2	Q9Y4W6	AFG32	AFG3-like protein 2	2.82111	-0.600899	No	0.305616	-0.134955	No	0.0355135	-0.0174876	No	7.5322	7.35713	7.72792	7.23584	7.08351	8.28666	7.99338	8.11595	8.00759	7.5375	6.93447	6.66717	7.52109	8.01616	7.14746	7.90654	7.48537	7.1979	7.13668	7.57482	7.55973	8.04812	7.2191	7.25689	7.16655	7.67665	7.08554	7.33023	7.23492	7.19368	7.82934	7.30243	7.38008	6.89944
AGA	P20933	ASPG	N(4)-(beta-N-acetylglucosaminyl)-L-asparaginase	0.0114168	-0.0132437	No	0.655416	-0.333404	No	0.576519	0.770159	No	NaN	7.29314	8.25072	9.09917	9.09742	8.87332	7.88906	8.1642	8.08912	9.65105	8.77831	9.61909	7.58356	8.18577	7.6077	7.22699	NaN	NaN	7.8232	7.9631	8.39442	7.75692	8.01854	9.57555	8.42548	7.97745	8.65698	6.21205	8.23362	7.91087	6.10128	6.65327	7.34936	7.99669
AGAP2	Q99490	AGAP2	Arf-GAP with GTPase, ANK repeat and PH domain-containing protein 2	1.62276	-0.489204	No	1.46668	-0.375325	No	1.48262	-0.494735	No	7.70976	7.90588	7.99503	7.43691	7.58016	7.78284	8.5676	8.36961	8.32878	8.02493	7.52413	6.71794	7.75064	7.79386	7.92305	7.9018	8.21092	7.52672	7.70851	8.02613	8.13913	8.25195	6.95431	7.12398	6.89156	7.49397	7.6858	7.40315	7.56855	7.37747	8.14689	7.5567	8.09518	7.77639
AGAP3	Q96P47	AGAP3	Arf-GAP with GTPase, ANK repeat and PH domain-containing protein 3	3.36935	-0.471554	No	1.2004	-0.30226	No	1.05751	-0.426854	No	6.59788	7.05809	6.84309	6.85705	6.99127	7.1259	7.44877	7.20543	7.45878	7.46626	5.94131	6.50297	6.80089	6.81755	7.20782	6.85802	6.57252	6.96701	6.65926	7.36015	7.20402	7.17917	5.76184	6.1077	6.11699	6.44254	6.83767	6.66983	6.84528	6.72592	6.77133	6.17756	7.34241	6.63519
AGFG1	P52594	AGFG1	Arf-GAP domain and FG repeat-containing protein 1	0.742733	0.404666	No	0.452097	-0.253088	No	0	NaN	No	NaN	NaN	5.52173	NaN	5.97423	NaN	1.69499	5.2352	NaN	5.45143	NaN	NaN	NaN	5.5476	6.00555	NaN	NaN	NaN	NaN	5.95748	6.10185	6.6134	NaN	NaN	NaN	NaN	5.55312	NaN	NaN	NaN	NaN	NaN	NaN	NaN
AGL	P35573	GDE	Glycogen debranching enzyme	0.12814	-0.0291032	No	0.157667	0.081526	No	0.20497	0.172218	No	6.91645	6.98527	6.86078	6.9421	6.55483	6.93688	6.95971	6.9418	6.719	6.84755	6.94462	6.32146	6.62478	6.67046	6.80098	6.55862	6.56426	5.44379	6.92488	6.5537	7.16168	6.78345	7.35922	7.0269	6.68804	6.73316	6.82022	6.78456	6.99329	6.78248	7.76736	NaN	6.07767	6.19705
AGRN	O00468	AGRIN	Agrin	1.40529	0.561185	No	0.929287	0.260904	No	0.32466	-0.229877	No	7.30112	7.78946	7.68998	7.59228	7.26944	7.34608	6.79155	7.34709	6.91342	6.43822	7.13203	6.76828	7.4454	7.67663	7.70747	8.32301	6.44335	7.029	6.91477	7.56384	7.35361	8.18282	7.00431	7.42709	7.07365	7.93035	7.4154	8.01733	7.38303	8.44751	7.87997	7.35219	7.9072	7.2775
AGT	P01019	ANGT	Angiotensinogen	0.422949	-0.391468	No	0	0.347607	No	0	NaN	No	NaN	NaN	4.32124	5.33814	5.52602	NaN	NaN	5.33218	5.69509	5.33253	NaN	NaN	5.62869	NaN	NaN	4.03045	NaN	NaN	5.28108	NaN	NaN	NaN	NaN	5.67127	NaN	NaN	NaN	NaN	NaN	NaN	5.1936	NaN	NaN	NaN
AHCY	P23526	SAHH	Adenosylhomocysteinase	1.4967	-0.373917	No	0.393741	-0.201864	No	0.395874	-0.170033	No	6.3029	6.80971	7.24725	6.85476	7.26349	7.10059	7.17669	7.46926	6.97453	7.62661	6.56549	6.65956	6.42285	6.75918	6.55396	6.80924	6.4518	6.13849	7.46186	6.92118	7.11934	6.88879	6.82065	7.23913	6.25243	6.50511	6.64045	6.43103	7.31698	6.93801	7.08136	6.36577	6.42932	6.77755
AHCYL1	O43865	SAHH2	S-adenosylhomocysteine hydrolase-like protein 1	0.7679	-0.215215	No	0.307809	0.068957	No	0.125026	-0.0648169	No	7.63451	7.23887	7.94983	7.93115	7.61787	7.86029	7.9458	8.04783	7.91388	7.68051	7.34514	7.05955	7.54723	7.89996	7.91766	7.91834	7.4026	7.11533	7.33893	7.82168	7.47822	8.11738	7.74652	7.52063	7.07554	6.94081	7.68476	7.9318	7.5009	7.98554	7.67897	7.30151	7.44419	7.37785
AHNAK	Q09666	AHNK	Neuroblast differentiation-associated protein AHNAK	0.538953	-0.361066	No	0.21077	-0.32767	No	0.580671	0.24854	No	7.16818	7.20091	8.22641	8.41922	8.17234	8.45895	7.56409	8.22553	7.95179	8.79202	8.05429	8.26569	7.58969	8.20784	7.38786	8.09099	7.6139	6.92666	10.4471	7.69743	8.58846	8.28883	8.33788	9.2441	7.81835	7.85868	8.4935	7.94869	8.20317	8.80461	8.02028	7.33161	7.55365	8.29664
AHNAK2	Q8IVF2	AHNK2	Protein AHNAK2	0.204442	0.0986008	No	0.981441	-0.249755	No	0.0777943	0.0804022	No	13.026	13.0187	12.3327	11.2366	12.2154	12.7649	12.3867	12.168	11.7289	12.288	12.5822	11.6757	12.424	11.4332	11.6443	11.6517	12.6384	12.2523	12.6468	11.9913	11.4124	11.9685	11.2939	12.271	11.9254	11.6301	10.1726	11.7057	10.2935	12.1887	NaN	11.0313	11.3112	11.8466
AHSA1	O95433	AHSA1	Activator of 90 kDa heat shock protein ATPase homolog 1	2.6276	-0.597137	No	0.484329	-0.357224	No	0.217787	-0.0803985	No	6.64539	6.55043	7.1214	7.23474	6.88186	7.02759	7.30927	7.68108	7.68561	7.71596	5.77378	5.95254	7.02212	7.29227	5.26013	6.96507	6.80374	6.05963	6.92396	7.08102	6.92584	6.61507	6.39285	6.68799	5.72672	6.20228	6.43204	6.14667	6.19654	6.66197	6.38927	6.48149	6.09636	6.24532
AIFM1	O95831	AIFM1	Apoptosis-inducing factor 1, mitochondrial	0.531197	-0.286256	No	0.81469	-0.215693	No	0.514055	0.123941	No	7.15889	6.75945	7.38958	5.9504	6.45578	6.5912	7.43513	7.70395	6.72882	6.68628	6.52208	6.30125	6.75287	6.34598	6.2973	5.97952	6.903	6.50217	6.86279	6.42325	6.09588	6.70606	7.02736	6.76445	NaN	7.17381	6.6834	7.14329	6.69849	6.65525	6.41797	NaN	6.8298	6.9392
AIMP1	Q12904	AIMP1	Aminoacyl tRNA synthase complex-interacting multifunctional protein 1	0.187467	0.104048	No	0.107159	0.0946053	No	1.35781	0.685882	Yes	5.98619	6.3292	6.19471	6.46048	6.03113	6.03728	5.98762	5.65791	6.11438	6.68429	6.03959	5.30562	5.25773	6.2526	5.93988	6.23931	NaN	NaN	5.72415	6.5616	5.02896	5.99638	6.41858	5.45493	NaN	NaN	6.36068	6.22469	5.44283	4.85716	NaN	NaN	5.87655	NaN
AIP	O00170	AIP	AH receptor-interacting protein	0.649859	-0.491877	No	0.0821786	-0.0403865	No	0.806608	-0.307696	No	7.02553	6.00816	7.75244	7.58047	7.7844	7.43823	7.81892	7.80732	7.8744	7.6715	7.22861	NaN	6.63792	7.76176	7.22916	7.62652	7.00954	6.47098	6.26419	7.83096	7.87145	7.70976	7.12479	6.87433	5.66412	5.68177	7.23432	6.5734	6.91074	7.0774	6.74526	6.15605	7.20914	6.90034
AJM1	C9J069	AJM1	Apical junction component 1 homolog	0.210506	0.117458	No	0.924118	-0.150491	No	0.879097	-0.38341	No	6.55932	6.4406	6.7918	6.5388	6.49083	6.24498	5.78907	6.51881	7.17619	6.505	6.6887	NaN	6.33599	6.8516	6.46389	6.7097	6.57328	5.58116	6.65373	7.10741	6.5563	6.9116	NaN	5.80747	NaN	NaN	6.19495	6.47969	6.48533	6.2716	6.32693	6.16162	6.49764	NaN
AK1	P00568	KAD1	Adenylate kinase isoenzyme 1	1.65412	-0.288924	No	1.05048	-0.224288	No	0.79229	-0.392199	No	7.86303	8.14104	8.48535	7.9347	8.41945	8.33594	8.60523	8.63634	8.20958	8.50109	7.69236	7.11642	7.98134	8.62798	7.81897	8.46751	7.9464	6.8795	8.39945	8.71532	8.2359	8.87375	8.41587	8.33708	7.53435	6.63986	7.92654	8.25243	8.50411	9.26357	8.34056	7.61128	7.90238	7.83742
AK2	P54819	KAD2	Adenylate kinase 2, mitochondrial	0.1314	0.0785409	No	0.522613	0.588508	No	0.125042	-0.188461	No	7.47517	NaN	6.7678	6.44856	6.13791	6.94243	6.5175	6.90285	6.12088	6.5491	6.82063	NaN	NaN	6.49442	NaN	6.83401	5.93205	6.52253	7.30351	NaN	6.86466	6.54557	7.03981	7.75737	NaN	8.46611	7.52549	NaN	7.6829	NaN	NaN	NaN	7.25932	8.05798
AK3	Q9UIJ7	KAD3	GTP:AMP phosphotransferase AK3, mitochondrial	1.71899	-0.251389	No	1.50392	-0.346931	No	0.14586	-0.10556	No	7.70954	7.58284	7.12555	7.366	7.0374	7.94255	7.9626	7.48233	7.37479	7.316	6.97947	6.77544	7.50995	6.57873	7.145	7.07442	7.39893	7.55852	7.40775	6.81787	7.49647	7.46505	6.87917	7.20559	6.31175	7.92028	7.38767	8.34241	7.11392	8.00606	7.06967	7.21793	7.62343	7.64923
AK4	P27144	KAD4	Adenylate kinase 4, mitochondrial	0.628203	-0.947955	No	0.612809	-0.398152	No	0.0701172	-0.0741322	No	6.56587	6.663	5.19206	6.23203	7.08622	5.9257	6.70306	8.55636	7.36587	7.92796	5.53029	NaN	7.18043	7.41229	6.22342	6.95702	6.52837	NaN	6.61033	7.60899	7.22304	7.32348	6.82076	6.80288	NaN	NaN	6.7895	NaN	7.20562	6.56628	6.43452	NaN	NaN	6.61105
AK5	Q9Y6K8	KAD5	Adenylate kinase isoenzyme 5	1.73937	-0.600032	No	0.787863	-0.235836	No	0.113347	0.0881288	No	6.90192	6.39725	7.32546	5.81368	7.22288	7.19824	7.2522	7.95843	6.82542	7.42705	5.97267	5.94985	6.63788	6.63383	6.79987	6.84323	6.61318	6.44895	6.38226	7.06185	7.00087	6.74523	7.35875	6.22288	5.63655	6.66598	6.64481	6.54418	7.17075	6.53865	6.65617	5.80601	6.59079	5.782
AKAP12	Q02952	AKA12	A-kinase anchor protein 12	0.365582	-0.61018	No	0.101194	-0.0446669	No	0.169144	-0.112874	No	6.65543	4.74416	7.8607	7.43228	7.54547	7.50759	7.96776	7.33507	6.99885	7.47967	7.41546	NaN	7.56889	7.3971	6.559	7.28981	7.52809	NaN	7.03259	7.83249	6.68172	7.37869	5.37286	6.52447	NaN	7.469	7.13408	7.47747	NaN	6.97599	6.97375	7.33664	7.7229	7.02098
AKAP5	P24588	AKAP5	A-kinase anchor protein 5	0.08144	-0.0212533	No	0	0.372667	No	NaN	0	No	NaN	NaN	8.02254	NaN	7.91286	NaN	7.86284	7.96658	7.61501	8.01133	NaN	NaN	NaN	7.54244	NaN	8.07197	NaN	NaN	NaN	NaN	7.35916	7.6993	NaN	NaN	NaN	NaN	NaN	NaN	NaN	NaN	NaN	NaN	NaN	NaN
AKR1A1	P14550	AK1A1	Aldo-keto reductase family 1 member A1	1.11648	-0.373277	No	0.551116	-0.353403	No	0.0933523	-0.0437551	No	5.95668	7.10334	7.19442	7.24941	7.75473	6.8367	7.31405	7.79026	7.36234	7.82162	6.43197	NaN	7.03167	7.304	6.97242	7.48328	7.01641	NaN	8.34987	6.96392	7.17564	7.48453	7.13412	6.64755	NaN	5.42635	6.90231	5.91531	7.48367	6.23193	6.63639	NaN	7.07426	5.98446
AKR1B1	P15121	ALDR	Aldo-keto reductase family 1 member B1	0.00634063	-0.00188675	No	0.44347	-0.265919	No	0.210669	0.181511	No	7.7554	8.02368	8.17458	6.42372	6.97307	7.46548	8.33488	8.09265	6.442	7.02487	6.43451	7.01997	7.83631	6.49724	7.23296	7.34665	7.78689	6.75863	7.48416	7.10578	7.13989	7.68781	7.62159	7.24619	7.39458	7.54681	6.86735	8.03362	7.5337	8.33861	7.54621	6.61403	6.80139	6.78714
AKR1B10	O60218	AK1BA	Aldo-keto reductase family 1 member B10	0	NaN	No	0	NaN	No	NaN	0	No	NaN	NaN	NaN	NaN	NaN	NaN	NaN	NaN	NaN	5.01745	NaN	NaN	NaN	NaN	NaN	NaN	NaN	NaN	5.7408	NaN	5.25935	NaN	NaN	NaN	NaN	NaN	NaN	NaN	NaN	NaN	NaN	NaN	NaN	NaN
AKR1C3	P42330	AK1C3	Aldo-keto reductase family 1 member C3	0.374895	0.313001	No	0.201956	0.146746	No	0.321658	-0.158223	No	8.16425	8.03242	7.71413	6.61964	6.84708	6.65712	7.56475	7.68976	6.41492	7.48595	7.78225	7.48224	NaN	7.73183	6.79017	7.29616	7.28832	NaN	8.26334	7.02469	6.94321	7.7572	7.76377	7.97235	NaN	7.61543	7.23444	6.5965	7.76566	8.48396	NaN	NaN	6.91454	7.03578
AKR7A2	O43488	ARK72	Aflatoxin B1 aldehyde reductase member 2	0.719655	0.126714	No	1.92576	-0.212846	No	0.364162	-0.232731	No	8.95939	8.65505	8.72757	8.86427	8.20052	8.64398	8.75817	8.45778	8.87682	8.03647	8.0707	8.09622	8.52336	8.73727	8.58065	8.75921	8.34873	8.52237	8.62106	8.97186	8.62834	8.95213	8.56137	8.45597	8.08163	8.61652	8.36826	9.51276	8.7769	9.33982	8.91989	8.13039	8.96812	8.85776
ALAD	P13716	HEM2	Delta-aminolevulinic acid dehydratase	0.181599	-0.093118	No	0.773962	0.251342	No	0.319347	-0.179468	No	5.96213	6.61978	6.97162	6.37816	6.43325	5.49445	7.12965	7.25758	6.79015	6.15869	6.32617	6.58333	5.87186	6.36026	6.43671	6.80841	5.70047	5.86249	6.05591	6.1487	6.60565	6.50546	6.4901	6.87266	4.62415	NaN	5.98072	5.90043	6.65373	6.47472	NaN	5.52488	6.24977	6.58358
ALCAM	Q13740	CD166	CD166 antigen	0.135987	-0.0933131	No	0.64256	0.270502	No	1.09436	0.860929	No	6.57336	6.22538	6.4129	6.81687	7.35546	6.11609	6.20572	7.43162	6.97385	7.12324	6.31042	NaN	6.66625	7.35983	7.12779	6.93628	5.83717	NaN	6.91086	6.57596	7.21491	6.50915	6.51918	6.60265	NaN	NaN	6.79563	NaN	NaN	5.85113	NaN	NaN	5.82529	NaN
ALDH16A1	Q8IZ83	A16A1	Aldehyde dehydrogenase family 16 member A1	0	-0.208199	No	0.177801	0.549182	No	0	-1.42512	No	NaN	NaN	NaN	5.05907	4.85451	5.61639	3.96372	4.23849	NaN	5.06271	NaN	NaN	NaN	4.87747	NaN	4.96371	NaN	NaN	5.62199	5.27052	4.68722	3.47229	4.19369	4.76652	NaN	NaN	3.59764	NaN	5.61881	NaN	4.03905	NaN	NaN	NaN
ALDH1A1	P00352	AL1A1	Aldehyde dehydrogenase 1A1	0.0186927	0.0101876	No	0.592403	-0.448871	No	0.291471	0.392853	No	5.36634	NaN	5.33848	5.43785	5.25201	5.81556	4.75958	5.21857	5.47009	4.84971	4.25975	NaN	NaN	5.15742	5.17792	5.51555	5.55489	NaN	5.23825	5.75123	5.09476	5.50526	5.09112	5.39231	NaN	NaN	4.01465	5.81048	5.09148	4.07056	5.32575	NaN	4.93596	4.63914
ALDH1B1	P30837	AL1B1	Aldehyde dehydrogenase X, mitochondrial	0.0110071	-0.018434	No	0	NaN	No	0	0.354789	No	NaN	5.01235	2.77584	3.50507	5.21444	4.72832	3.98096	4.26906	3.58399	4.74743	NaN	NaN	NaN	6.17079	NaN	NaN	NaN	NaN	4.43522	NaN	NaN	5.44772	5.8008	NaN	NaN	NaN	NaN	NaN	5.44601	NaN	NaN	NaN	NaN	NaN
ALDH1L1	O75891	AL1L1	Cytosolic 10-formyltetrahydrofolate dehydrogenase	1.88227	-0.444038	No	0.255685	-0.0638491	No	1.3234	-0.265458	No	8.81577	7.49398	8.95223	8.52156	8.65245	9.49453	8.12803	9.39927	8.8844	8.74996	8.20687	8.22112	7.85694	9.06662	8.57647	8.98934	8.58745	8.37798	7.52222	8.96745	8.71096	9.13438	9.19384	9.2914	8.31178	8.45799	8.77323	9.14087	9.29527	9.5673	9.06475	8.68393	8.88933	9.26129
ALDH2	P05091	ALDH2	Aldehyde dehydrogenase, mitochondrial	2.01933	-0.420958	No	0.549792	-0.110181	No	0.0799851	-0.0307058	No	9.50522	9.61013	10.0657	9.70307	9.75313	10.1673	10.2208	10.4109	9.94732	9.99564	8.64296	8.81058	9.69407	9.63595	9.73425	9.86617	9.06109	9.02192	9.80015	9.37002	9.87294	9.91894	10.102	9.92403	8.79529	8.62696	9.22721	9.96636	10.0245	10.1618	9.33731	8.31185	9.34299	9.64774
ALDH3A1	P30838	AL3A1	Aldehyde dehydrogenase, dimeric NADP-preferring	0.106909	-0.183694	No	1.2405	-0.891087	No	0.521568	0.312587	No	3.89142	6.29347	5.55346	6.37884	5.38564	6.03634	5.68074	5.60105	4.89454	6.20864	5.24923	5.70231	6.514	6.41327	5.67424	4.85933	5.9008	NaN	8.29114	NaN	6.19573	5.47347	5.79416	6.38763	NaN	NaN	5.65983	NaN	5.92301	5.76961	6.04932	NaN	5.21124	5.78191
ALDH3A2	P51648	AL3A2	Aldehyde dehydrogenase family 3 member A2	0.0719017	0.100705	No	1.44116	-0.640892	No	0	0.986688	No	5.60819	NaN	6.37774	6.48445	6.55483	6.62635	6.68878	5.60841	6.85517	5.53246	5.82051	5.96104	5.74226	6.14437	5.80665	6.08076	6.1951	NaN	7.1064	6.29804	6.35585	6.84362	NaN	6.63317	NaN	NaN	6.34885	NaN	4.8959	5.64648	5.62285	NaN	NaN	NaN
ALDH4A1	P30038	AL4A1	Delta-1-pyrroline-5-carboxylate dehydrogenase, mitochondrial	1.55864	-0.341181	No	1.25481	-0.237577	No	0.672829	-0.158136	No	10.0718	9.81517	10.7207	9.9042	10.262	10.3626	10.4907	10.7669	10.2224	10.6373	8.83402	8.62292	10.3681	10.1883	11.0181	10.7473	9.50356	8.79464	10.6467	10.4139	11.015	10.8303	10.2599	9.25303	9.33379	8.75149	9.8669	10.0674	10.5514	9.66025	9.71308	8.79882	10.0078	9.75003
ALDH5A1	P51649	SSDH	Succinate-semialdehyde dehydrogenase, mitochondrial	1.71562	-0.369341	No	0.0651915	0.0244308	No	0.299958	-0.13831	No	8.20025	7.86595	8.50261	7.69971	8.19197	8.31024	8.5409	8.71891	8.1185	8.61864	7.69789	7.64499	8.24233	7.99896	7.7151	8.28141	7.97154	7.62918	7.74926	7.83171	8.11569	8.13673	8.11874	7.94443	7.69385	8.02627	7.5369	8.619	8.08473	8.55035	8.51081	7.66233	7.54163	8.41919
ALDH6A1	Q02252	MMSA	Methylmalonate-semialdehyde dehydrogenase	1.82767	-0.428526	No	0.282183	-0.148636	No	0.863381	-0.249527	No	8.1686	8.34047	9.00199	7.82334	8.41164	8.83277	8.91655	9.55069	7.9902	8.59846	7.36271	7.60992	8.89057	8.0256	7.41599	8.70541	8.41375	7.40035	8.55253	7.91066	7.92339	8.70134	8.47685	8.52783	7.70229	7.98323	7.88907	7.86874	8.67138	9.01821	8.5012	7.83967	7.86656	8.04815
ALDH7A1	P49419	AL7A1	Alpha-aminoadipic semialdehyde dehydrogenase	1.76582	-0.359888	No	1.04271	-0.205622	No	0.78543	-0.181121	No	9.99956	9.77096	10.3105	9.73001	9.72901	10.2326	10.4779	10.6914	9.93834	9.99924	9.72682	9.62208	9.52882	9.56135	9.98991	9.93618	10.0714	9.47435	9.65755	10.1344	10.1872	10.074	10.3441	10.188	9.34179	9.26306	9.47191	9.93349	10.3064	10.8265	9.71896	9.25076	9.5962	9.93021
ALDH9A1	P49189	AL9A1	4-trimethylaminobutyraldehyde dehydrogenase	1.36739	-0.217716	No	0.918908	-0.113123	No	0.200515	-0.064922	No	9.87691	9.80474	10.0066	9.74499	9.64328	10.1211	10.252	10.0139	9.86281	9.91525	9.88128	9.43225	9.65547	9.74671	9.89631	9.97391	9.84583	9.41908	9.98789	9.88409	10.1316	9.99621	10.0352	10.1265	9.50641	8.98775	10.0112	10.4615	10.0558	10.2436	9.98996	9.30921	9.77103	10.1485
ALDOA	P04075	ALDOA	Fructose-bisphosphate aldolase A	1.96734	-0.228639	No	1.91651	-0.179622	No	0.729883	-0.158437	No	12.4857	13.1878	12.9765	12.5957	12.8762	12.7993	13.4062	13.1467	12.9587	12.9542	12.5119	12.1572	12.697	12.4282	12.7269	12.6377	12.6252	12.2978	12.9607	12.7151	12.7267	12.9111	12.5557	12.1213	12.2202	12.0145	12.0709	12.169	12.8393	12.3336	12.7545	11.9889	12.2153	11.9706
ALDOC	P09972	ALDOC	Fructose-bisphosphate aldolase C	0.714616	-0.169527	No	0.612589	-0.145151	No	1.09654	-0.341227	No	11.3548	11.9641	12.1788	11.6452	11.6455	11.6604	12.2615	11.9986	12.0502	11.6655	11.6666	10.5557	11.9038	11.7719	12.0151	11.8256	11.8129	11.0614	11.7163	12.1413	11.8927	11.9851	11.4026	10.7833	11.0155	10.8801	11.1173	11.2778	11.6679	11.3281	11.8451	11.0657	11.6236	10.9938
ALOX12	P18054	LOX12	Polyunsaturated fatty acid lipoxygenase ALOX12	NaN	0	No	0	NaN	No	NaN	0	No	NaN	NaN	NaN	NaN	NaN	NaN	NaN	NaN	NaN	NaN	NaN	NaN	NaN	NaN	NaN	NaN	NaN	NaN	6.87362	NaN	NaN	NaN	NaN	NaN	NaN	NaN	NaN	NaN	NaN	NaN	NaN	NaN	NaN	NaN
ALOX12B	O75342	LX12B	Arachidonate 12-lipoxygenase, 12R-type	0.431142	-0.68439	No	0.344728	0.622535	No	0.954307	1.06211	No	6.12862	6.71246	8.38208	8.87555	9.44912	9.28386	7.72251	8.56705	8.16221	9.23414	8.12283	9.3692	7.21702	8.54461	7.01949	7.56777	7.04855	5.71518	8.41799	7.5397	8.54808	6.83619	8.4298	9.64543	7.56769	8.19509	9.24869	6.83958	8.22059	8.09216	5.9027	7.11589	6.35437	7.86791
ALOXE3	Q9BYJ1	LOXE3	Hydroperoxide isomerase ALOXE3	0.0816449	0.156286	No	0.0201556	0.0301491	No	0.720777	0.752515	No	6.18623	NaN	7.50876	8.54816	9.6752	7.85357	7.2902	7.48572	7.36869	8.58522	8.07563	8.64063	7.09649	7.87678	7.20957	6.97725	6.83283	NaN	8.35055	7.59906	8.20771	6.09484	6.98097	9.06322	7.58091	7.22861	8.29386	NaN	8.09269	7.55209	6.68313	6.11443	6.94265	7.90225
ALYREF	Q86V81	THOC4	THO complex subunit 4	1.08348	0.68129	No	1.71571	0.615041	Yes	0.690621	0.570074	No	7.08996	7.54521	6.4909	6.29563	6.0432	6.53989	6.29267	5.58068	NaN	6.03088	7.17029	6.39903	7.04914	7.06227	6.60999	6.88574	6.3906	5.84493	5.90834	6.7402	5.64754	6.95461	6.97869	6.78847	6.68286	7.38148	5.17959	6.20004	5.80319	6.60045	NaN	6.23376	5.41054	NaN
AMPD2	Q01433	AMPD2	AMP deaminase 2	0.49347	0.103941	No	0.062693	-0.033293	No	0.0263384	0.0185534	No	6.95574	7.16935	6.69995	6.38231	5.92442	6.79318	6.78729	6.52874	6.45036	6.05249	6.88387	6.49297	6.66591	6.23797	6.67577	6.85431	6.93061	NaN	6.16277	6.79319	6.46411	7.13362	6.66119	6.29276	6.86163	7.04071	7.03385	7.67097	6.03176	6.87483	7.42335	6.72136	7.38938	7.00909
AMPH	P49418	AMPH	Amphiphysin	1.40145	-0.322466	No	1.48466	-0.24056	No	1.33159	-0.296995	No	10.1773	10.7482	10.9846	10.5312	10.8447	10.6581	11.3706	10.9964	10.8414	11.0318	9.98987	9.62187	10.5777	10.1342	10.4031	10.747	10.2048	10.0718	10.4416	10.4854	10.7032	11.0104	10.3017	9.61642	9.7984	9.94365	9.8299	9.89021	10.5477	9.9394	10.6231	10.1201	10.0186	9.91343
AMY1B	P0DTE7	AMY1B	Alpha-amylase 1B	1.55891	-0.54439	No	0.258301	-1.03085	No	0.272201	0.952456	No	5.885	4.36698	6.40173	6.97774	6.91655	6.13001	5.43186	7.15136	7.41662	7.14009	6.7195	7.00113	5.05019	6.80381	5.75614	6.35645	NaN	3.54344	10.7165	6.3182	9.14203	6.40179	7.08882	8.82797	5.61277	NaN	7.49058	NaN	7.19746	6.81441	NaN	5.96689	NaN	6.67004
ANAPC1	Q9H1A4	APC1	Anaphase-promoting complex subunit 1	0	1.4885	No	0	NaN	No	0	NaN	No	NaN	NaN	NaN	8.97466	8.6305	9.7279	NaN	NaN	7.48616	NaN	NaN	NaN	NaN	8.4229	NaN	NaN	NaN	NaN	8.97045	NaN	NaN	8.27935	NaN	NaN	NaN	NaN	9.05517	NaN	NaN	NaN	NaN	NaN	NaN	NaN
ANK1	P16157	ANK1	Ankyrin-1	0	NaN	No	0	-0.412861	No	0	NaN	No	NaN	NaN	NaN	NaN	NaN	NaN	NaN	4.91996	NaN	4.66845	NaN	NaN	NaN	NaN	NaN	4.92785	NaN	NaN	NaN	NaN	5.72574	5.34071	NaN	5.83438	NaN	NaN	NaN	NaN	NaN	NaN	NaN	NaN	NaN	NaN
ANK2	Q01484	ANK2	Ankyrin-2	1.44959	-0.282022	No	1.23264	-0.269207	No	1.4359	-0.431434	No	10.1628	10.507	10.5422	10.2425	10.3574	10.5593	10.9891	10.6392	10.6437	10.3908	9.87656	9.39799	10.2393	10.4167	10.469	10.5598	10.4189	9.99293	10.1608	10.7076	10.489	10.8053	10.0297	9.88505	9.54073	9.89984	9.97677	10.4657	10.4832	10.3597	10.4567	10.3203	10.5355	10.2311
ANK3	Q12955	ANK3	Ankyrin-3	2.36091	-0.474091	No	1.7628	-0.243115	No	1.59384	-0.308485	No	9.36421	9.50228	9.70324	9.36526	9.60505	9.90345	10.1487	10.0534	9.97911	9.82584	9.14342	8.41781	9.41717	9.76444	9.51741	9.72308	9.51752	8.83765	9.35707	9.96427	9.75067	10.0148	9.26781	9.10231	8.8891	8.8822	9.23966	9.24743	9.59661	9.3015	9.6615	9.12269	9.46196	9.33517
ANKS1B	Q7Z6G8-3	ANS1B	Ankyrin repeat and sterile alpha motif domain-containing protein 1B	2.23245	-0.43617	No	1.04005	-0.337377	No	0.6278	-0.248831	No	7.3659	7.50908	8.05323	7.97589	8.36331	7.71974	8.11736	8.67349	8.38637	8.55128	6.91626	NaN	7.31588	7.82916	7.64602	8.1408	7.49377	NaN	7.19872	8.05562	8.40568	8.38122	6.76736	6.8165	NaN	NaN	7.21901	7.0142	7.24514	6.65607	6.79305	NaN	7.78533	7.12585
ANO8	Q9HCE9	ANO8	Anoctamin-8	0	NaN	No	0	NaN	No	0	NaN	No	NaN	NaN	NaN	NaN	4.02048	NaN	4.4656	3.64529	4.74628	NaN	NaN	NaN	NaN	NaN	NaN	4.52453	NaN	NaN	NaN	4.2578	NaN	NaN	NaN	NaN	NaN	NaN	NaN	2.85385	NaN	NaN	NaN	NaN	NaN	NaN
ANXA1	P04083	ANXA1	Annexin A1	0.484047	-0.676443	No	0.246299	-0.9696	No	0.718227	0.879787	No	7.28172	6.90104	8.86244	10.1847	8.98776	9.65061	7.67652	8.35124	9.35092	10.5705	9.33476	9.02403	6.7609	9.70869	7.57619	7.61218	7.01959	6.55378	14.1427	8.18538	10.7721	9.16084	8.74849	11.325	7.91247	7.40586	10.1752	8.0194	9.19828	9.62479	6.26011	7.08833	7.30476	8.83137
ANXA11	P50995	ANX11	Annexin A11	1.40114	-0.464931	No	0.331557	-0.164982	No	0.55063	0.172356	No	7.54643	7.50762	7.95409	8.29366	8.20613	8.58776	8.04316	8.1896	8.52336	8.48871	7.9326	7.34018	7.36733	8.27986	8.07979	8.07151	8.04968	6.73514	8.31793	8.24364	8.48958	8.22517	8.22807	8.45752	7.08725	7.53288	8.56652	8.09994	8.24355	8.00925	7.46404	7.37443	7.94954	7.89724
ANXA2	P07355	ANXA2	Annexin A2	0.814753	-1.06006	No	0.172323	0.436891	No	0.728051	0.900743	No	7.64906	7.1923	9.80961	10.2918	10.0429	10.5118	8.83421	10.1322	9.58872	11.219	10.1715	10.8343	8.2678	9.86379	7.85406	8.65267	7.62198	7.33117	10.4772	8.74614	10.0131	8.83324	9.96267	11.354	8.84108	9.29981	10.8535	8.20532	9.90569	9.81732	7.5313	8.40338	7.9156	9.53865
ANXA3	P12429	ANXA3	Annexin A3	0.472756	0.173309	No	0.0163942	-0.0723737	No	0	0.630652	No	6.26687	NaN	6.00899	6.71976	6.91305	6.25585	5.64307	6.1489	6.16843	6.64226	6.68813	6.49562	NaN	7.63446	5.59678	5.68703	NaN	NaN	6.76544	5.05689	7.66541	6.4131	7.03459	6.83266	NaN	5.67286	7.07904	NaN	NaN	6.20201	NaN	NaN	NaN	5.24311
ANXA4	P09525	ANXA4	Annexin A4	0.375053	-0.544067	No	0.378061	-0.23793	No	0.135514	0.0786921	No	5.5006	NaN	7.02007	6.72476	7.03979	7.59802	6.41604	6.69875	6.32403	7.84068	6.13084	7.39951	5.86624	6.37976	6.03541	6.09134	5.4664	NaN	6.76711	6.66612	6.6155	6.17811	6.56387	7.42234	6.20688	6.22452	7.08393	6.68404	6.98974	7.11373	5.49406	6.62605	6.46111	7.02873
ANXA5	P08758	ANXA5	Annexin A5	0.643091	0.232021	No	0.0305985	-0.0159051	No	1.00014	-0.343575	No	11.07	10.6316	10.8721	10.6758	10.1524	10.998	10.8073	10.5408	9.8784	10.0173	10.6898	10.3755	9.93099	10.1224	11.1131	11.0445	10.5504	10.4489	10.4679	10.5082	10.4227	10.9735	10.9773	11.0813	10.9764	10.4951	10.4029	11.4991	11.0144	11.9849	11.174	10.9333	11.1001	11.2868
ANXA6	P08133	ANXA6	Annexin A6	1.80479	-0.313402	No	1.29382	-0.170181	No	0.69235	-0.177507	No	7.68252	7.70998	8.15255	8.16779	8.0389	7.8473	8.23684	8.42689	8.62826	8.17945	7.64015	7.14053	7.4177	7.8148	7.88089	8.23273	8.02461	7.35357	7.49717	7.90214	7.82685	8.54354	7.84983	7.38251	7.46877	7.4913	7.75885	8.03271	7.85185	7.67656	8.08572	7.61395	8.04512	7.77583
ANXA7	P20073	ANXA7	Annexin A7	1.14594	-0.334226	No	0.0398747	0.0104737	No	0.430819	0.191626	No	7.41944	7.49752	7.60282	7.6761	7.7823	8.2093	7.67979	7.69186	7.77646	8.2919	7.6725	7.32763	6.95453	7.56193	7.51447	7.70306	7.49032	7.11535	7.28451	7.7001	7.56926	7.51176	7.45119	7.89998	7.23058	7.49897	7.64557	7.3682	7.83039	7.60463	7.21008	6.45441	7.45159	7.39364
ANXA8	P13928	ANXA8	Annexin A8	0.210769	-0.509533	No	0	NaN	No	0	NaN	No	NaN	NaN	3.93365	5.7258	4.39869	5.83823	NaN	3.7047	NaN	5.6467	5.21028	NaN	NaN	4.60455	NaN	NaN	NaN	NaN	8.08856	NaN	5.6027	NaN	NaN	6.18828	NaN	NaN	NaN	NaN	5.33994	NaN	NaN	NaN	NaN	NaN
AP1B1	Q10567	AP1B1	AP-1 complex subunit beta-1	1.69384	-0.423092	No	0.588397	-0.163121	No	0.232639	-0.0736496	No	6.67681	7.32808	7.8788	6.892	7.67843	6.84825	8.11282	8.1902	7.47448	7.94382	6.9782	6.73566	7.45809	6.48195	6.98266	7.12953	7.4289	6.39185	7.72595	6.79508	7.36939	7.03366	7.19824	6.93155	6.48711	6.06503	6.23093	6.6321	7.61141	7.18032	6.70049	6.2329	6.04084	6.2209
AP1M1	Q9BXS5	AP1M1	AP-1 complex subunit mu-1	0.463358	0.181455	No	0.0097081	0.00648459	No	0.208989	-0.16155	No	6.98522	7.35922	6.33589	6.43634	6.69423	7.27554	6.94269	5.73906	6.11331	6.83302	6.58668	6.13954	6.43746	6.05361	6.76578	6.40796	6.37676	7.07069	5.69535	5.93978	6.74897	6.52057	6.85301	NaN	6.6221	5.82217	6.15721	6.43203	6.19165	6.43586	6.36994	6.6678	6.99684	6.46804
AP2A1	O95782	AP2A1	AP-2 complex subunit alpha-1	2.23438	-0.535937	No	1.21395	-0.240478	No	0.965011	-0.316198	No	9.8682	9.81733	10.1505	9.68038	9.92664	10.2771	10.6302	10.5443	10.4205	10.2507	9.28407	8.72153	9.84321	9.85481	9.67116	9.84452	9.62786	9.30797	9.82606	9.87557	10.0901	9.9346	9.53304	9.10602	8.62287	9.13821	9.33249	9.5929	9.98151	9.43597	9.55812	9.21688	9.69368	9.33654
AP2A2	O94973	AP2A2	AP-2 complex subunit alpha-2	2.41202	-0.482181	No	1.16211	-0.181196	No	0.690196	-0.134661	No	9.02763	9.28979	9.5434	9.11882	9.19862	9.66914	9.95577	9.91305	9.60932	9.44189	8.78859	8.89525	9.27505	9.23315	9.21222	9.27354	9.22966	9.0614	9.13647	9.38716	9.50968	9.44063	8.95131	8.71745	8.43246	8.83334	8.82107	8.84007	9.38017	8.7161	8.85349	8.84979	8.77151	8.83262
AP2B1	P63010	AP2B1	AP-2 complex subunit beta	1.46907	-0.410117	No	1.41967	-0.428796	No	1.17011	-0.325717	No	7.88738	8.56701	8.46726	7.49712	8.43963	8.65267	8.74249	8.84415	8.13679	8.53287	7.13769	7.38518	8.33132	7.56282	7.94027	7.88075	8.06479	8.21643	8.30371	7.76845	8.18323	8.27419	8.10104	7.61284	7.66658	7.81678	7.12668	7.24632	8.53664	7.66864	8.40389	8.13356	6.94077	7.84104
AP2M1	Q96CW1	AP2M1	AP-2 complex subunit mu	2.39948	-0.42511	No	0.371876	-0.0759242	No	1.22082	-0.23074	No	8.94767	9.0423	9.08845	9.11904	8.95998	9.33429	9.46312	9.48874	9.79869	9.19815	8.57696	8.29938	9.00053	9.09867	9.01117	8.94266	8.58533	8.69562	8.79496	9.02115	9.21437	9.07348	8.81196	8.37473	7.81118	8.54134	8.72861	8.35478	8.86667	8.53303	8.48231	8.57057	8.9327	8.62176
AP3B2	Q13367	AP3B2	AP-3 complex subunit beta-2	2.75467	-0.416509	No	0.580691	-0.199699	No	0.647028	-0.289288	No	8.17717	8.6419	8.48622	8.43847	8.29996	8.54885	9.0412	9.01545	8.98244	8.53833	7.61611	6.78121	8.45889	8.60649	8.40816	8.49846	8.47309	6.95412	8.09865	8.77473	8.5486	8.71832	7.43073	7.44542	6.97574	7.18936	7.87945	7.53851	7.97617	7.17082	8.03938	7.395	8.33096	7.28261
AP3D1	O14617	AP3D1	AP-3 complex subunit delta-1	0.514598	0.158895	No	0.0629692	0.0181923	No	0.889868	-0.227718	No	7.67725	8.0148	7.85936	7.7259	7.80358	7.01734	8.13672	7.70107	7.59672	7.83456	7.72936	NaN	7.59548	7.60125	8.04693	8.06496	7.67021	7.03944	7.3705	7.96134	7.91069	8.03428	7.1341	7.26286	7.40291	7.14076	7.48858	7.63469	7.35643	7.66992	8.05131	6.97515	7.82414	7.55326
AP3M2	P53677	AP3M2	AP-3 complex subunit mu-2	1.04847	-0.297489	No	0.452792	-0.19005	No	0.755524	-0.481887	No	6.28636	6.381	6.61079	6.21906	6.45135	6.82971	6.86715	7.12495	6.17724	6.43696	5.63052	5.93161	6.43813	6.28483	6.21365	6.46914	6.4982	6.13956	5.9009	6.35803	6.38051	6.83099	6.0309	5.33719	6.43588	6.40894	5.55728	5.728	6.12682	6.00156	6.53389	6.34303	5.73308	7.65113
AP3S1	Q92572	AP3S1	AP-3 complex subunit sigma-1	0.240653	-0.176184	No	0.141861	0.0453757	No	0	-0.0370069	No	7.77635	7.13159	6.55019	7.53925	7.72414	7.69891	6.58241	7.71132	7.48266	8.12714	7.51524	6.62186	7.33008	7.51589	NaN	7.91129	NaN	6.60931	6.97065	7.71518	7.54078	7.90247	6.77476	NaN	NaN	NaN	7.07795	7.26331	NaN	NaN	NaN	NaN	7.11496	NaN
AP3S2	P59780	AP3S2	AP-3 complex subunit sigma-2	0	-1.03186	No	0.0928681	0.157113	No	0	NaN	No	NaN	NaN	4.78804	NaN	NaN	6.38616	NaN	5.8199	6.52695	5.37173	NaN	NaN	NaN	6.20591	6.05754	6.2064	NaN	NaN	NaN	4.93749	6.64508	6.41594	NaN	5.74732	NaN	NaN	NaN	5.62426	NaN	NaN	NaN	NaN	NaN	NaN
APBA1	Q02410	APBA1	Amyloid-beta A4 precursor protein-binding family A member 1	1.48195	0.537439	No	0.62628	-0.231596	No	0.349372	0.249898	No	6.04309	5.31001	5.39391	5.3448	5.67489	5.20543	5.30246	4.73902	5.04608	4.78652	4.92815	NaN	5.45803	5.74381	5.28404	5.65363	5.43219	NaN	5.29004	6.1641	5.86072	5.47857	5.37855	5.09054	NaN	NaN	5.96115	NaN	4.80524	5.36917	NaN	NaN	5.50613	NaN
APEH	P13798	ACPH	Acylamino-acid-releasing enzyme	0.365202	-0.155591	No	0.0829329	0.0378296	No	0.332561	0.121276	No	8.6049	8.59324	9.34765	9.09627	8.98699	8.32927	9.40062	9.36498	9.21935	9.09279	8.88438	8.93487	8.92327	8.87066	8.40929	8.77163	8.51654	8.33078	9.25602	8.88763	8.85281	8.72335	8.60828	8.77606	8.09681	8.29835	8.93976	8.08487	8.79078	8.06159	8.26857	8.10623	8.56179	8.28751
API5	Q9BZZ5	API5	Apoptosis inhibitor 5	NaN	0	No	0	-0.0915642	No	0	NaN	No	NaN	NaN	NaN	NaN	NaN	NaN	NaN	NaN	NaN	NaN	NaN	NaN	NaN	6.43152	NaN	NaN	4.65805	NaN	NaN	6.52308	NaN	NaN	6.83445	NaN	NaN	NaN	NaN	NaN	NaN	6.63557	NaN	NaN	NaN	NaN
APMAP	Q9HDC9	APMAP	Adipocyte plasma membrane-associated protein	0.203879	-0.109546	No	0.811752	0.122039	No	0.645401	0.247134	No	7.62845	7.99939	7.6844	7.69044	7.22491	8.33869	7.53262	7.45721	8.00771	7.4391	7.36154	6.97481	7.61304	7.64314	7.95922	8.01694	7.30908	6.88752	7.22244	7.78525	7.84113	7.79105	7.58826	7.70245	7.17889	7.16358	7.67062	7.46985	7.0233	6.81951	7.49126	7.28703	7.37638	7.29337
APOA1	P02647	APOA1	Apolipoprotein A-I	0.0184294	-0.0523944	No	0.079709	0.142338	No	0.330461	0.287495	No	NaN	NaN	5.77503	7.54923	6.45717	7.40107	6.32022	6.8309	5.82469	7.28302	6.38195	7.11788	5.69557	7.39333	5.54468	5.89557	5.71934	NaN	6.18595	5.03298	6.71013	6.551	6.35399	6.77774	6.05653	6.00423	7.07414	NaN	6.09755	7.31687	5.65122	6.23984	5.52368	6.26747
APOB	P04114	APOB	Apolipoprotein B-100	0.112832	0.132895	No	0.00780137	0.00882709	No	0.0294844	0.0791619	No	NaN	NaN	6.08082	7.21385	6.87031	NaN	4.44721	6.37884	7.44885	5.9386	5.97959	NaN	6.94546	7.25279	7.646	6.72449	NaN	NaN	6.11171	7.74607	7.24675	7.4289	NaN	NaN	NaN	NaN	7.23368	7.85507	NaN	NaN	NaN	NaN	7.9196	7.01083
APOC3	P02656	APOC3	Apolipoprotein C-III	0.546998	0.10714	No	0.257983	-0.25217	No	0.0418931	0.0474939	No	7.74569	8.6667	9.05277	8.97303	NaN	NaN	8.50836	NaN	8.91709	NaN	NaN	NaN	NaN	8.50255	9.49985	9.15714	8.42875	NaN	8.03899	9.05195	NaN	9.11208	7.76165	8.09541	NaN	8.73318	NaN	9.47435	NaN	8.76878	8.54393	8.40901	9.51549	8.98267
APOD	P05090	APOD	Apolipoprotein D	0.405894	-0.361096	No	0.216946	0.24504	No	0.15731	0.158857	No	6.10791	6.17126	7.48069	7.67601	8.22408	7.82274	6.76997	7.57337	7.30157	7.99779	6.90695	7.69244	6.09376	6.58053	5.93802	6.90949	5.94855	6.06641	7.29278	6.58204	6.71321	6.04796	6.98321	7.58551	6.46491	NaN	7.15222	5.70322	6.62214	7.1914	6.05237	6.17379	6.22919	6.99969
APOE	P02649	APOE	Apolipoprotein E	0.393111	-0.0979515	No	0.135134	-0.0482783	No	0.348102	-0.163393	No	8.28979	9.41046	9.10617	8.66713	8.9705	8.75282	9.34221	9.01557	8.87124	8.95194	8.22681	7.96763	8.68342	9.66661	8.65245	8.96827	8.27247	8.23769	8.73553	10.0986	8.11901	8.99155	8.96168	8.70516	8.49989	8.02425	8.56489	8.89942	8.72453	9.71754	8.94077	8.09018	8.3116	8.85104
APOL2	Q9BQE5	APOL2	Apolipoprotein L2	0.318289	-0.3533	No	0.103514	-0.0578104	No	0.392721	0.347775	No	6.92595	5.64069	7.20292	6.50746	7.09442	6.99496	7.72894	7.52754	6.27575	6.61077	6.64605	5.73162	6.3782	7.25815	NaN	7.25792	6.45557	6.3751	6.00653	7.03441	6.95311	7.68937	NaN	6.70429	NaN	NaN	6.67643	6.97319	5.92945	7.01288	5.60373	5.10772	5.91308	6.38464
APOO	Q9BUR5	MIC26	MICOS complex subunit MIC26	1.02891	-0.787918	No	0.00588529	0.00502968	No	0	-0.327066	No	NaN	5.97737	6.74997	7.29602	8.03153	NaN	6.20508	8.47418	7.93663	8.59068	5.7519	NaN	6.99345	7.04739	NaN	7.59002	NaN	NaN	6.75057	NaN	7.54552	7.82285	6.99777	NaN	NaN	NaN	NaN	NaN	7.32483	NaN	NaN	NaN	NaN	NaN
APOOL	Q6UXV4	MIC27	MICOS complex subunit MIC27	0.0468715	0.0429591	No	0.0529736	-0.0791742	No	0	NaN	No	NaN	NaN	6.5027	5.92827	6.58072	5.6678	4.48594	6.79736	6.1363	5.94916	4.35874	NaN	6.38593	5.65202	NaN	5.7373	5.94933	NaN	5.98022	5.25591	NaN	5.26523	NaN	NaN	NaN	NaN	5.35107	NaN	5.84435	NaN	6.68113	NaN	NaN	NaN
APP	P05067	A4	Amyloid-beta precursor protein	1.07598	0.506819	No	0.640115	0.478343	No	0	NaN	No	5.59449	5.92465	6.42544	6.7808	6.80759	NaN	5.44584	5.76061	6.80795	5.89681	6.14803	NaN	NaN	5.98046	6.96589	7.02952	NaN	NaN	5.6735	6.02233	6.0507	6.4678	NaN	NaN	NaN	NaN	6.18801	NaN	NaN	NaN	NaN	NaN	NaN	NaN
APPL1	Q9UKG1	DP13A	DCC-interacting protein 13-alpha	0.414511	-1.06788	No	0.806767	0.571164	No	1.39834	0.338146	No	6.51615	2.40732	6.43037	6.61286	6.26238	NaN	6.62815	6.30597	6.63079	6.41953	NaN	NaN	NaN	6.41169	7.12606	6.95501	6.24859	NaN	6.05788	6.33758	6.19511	6.24659	6.57292	6.40125	NaN	NaN	5.98095	6.48567	6.11893	6.05387	NaN	NaN	5.76788	NaN
APRT	P07741	APT	Adenine phosphoribosyltransferase	0.257434	0.079963	No	0.927542	-0.269519	No	0.247583	-0.481443	No	NaN	NaN	9.12298	9.55057	9.06758	7.34308	9.15632	9.03043	9.28133	9.18948	9.40846	8.50202	8.6875	9.09459	NaN	9.27919	9.57991	NaN	9.17742	9.54685	9.18157	9.24363	8.72519	8.57942	NaN	NaN	9.70776	NaN	NaN	9.65313	NaN	NaN	9.59693	NaN
AQP4	P55087	AQP4	Aquaporin-4	0.262879	-0.0692737	No	0.194006	0.122606	No	0.391224	-0.326276	No	6.59815	7.36142	7.93411	7.37042	7.96992	7.05316	7.41603	7.90453	7.19139	8.01529	7.26743	6.67904	8.10589	7.89649	6.53871	8.60854	7.56443	5.82746	7.83602	8.42584	5.74993	8.95679	6.93042	7.6323	7.14876	8.14648	5.80291	7.06495	7.45847	8.77847	7.75392	6.96369	6.8646	6.86434
ARCN1	P48444	COPD	Coatomer subunit delta	0.499372	0.731545	No	0	-0.451473	No	0	NaN	No	5.162	NaN	5.79264	6.4593	5.44706	2.82802	5.39359	5.40634	5.65215	6.04831	6.04782	NaN	5.11349	5.72696	NaN	NaN	NaN	NaN	5.56497	NaN	NaN	6.28075	NaN	6.41914	NaN	NaN	NaN	NaN	NaN	NaN	NaN	NaN	NaN	NaN
ARF3	P61204	ARF3	ADP-ribosylation factor 3	0.0240601	-0.0291816	No	0.0439593	-0.0281033	No	0.125283	-0.138516	No	6.36201	6.5557	6.10276	6.60787	6.339	4.84583	6.81707	6.97576	6.9879	6.48668	5.76726	6.22069	6.8253	6.47563	5.77281	6.23042	5.73258	NaN	6.15031	6.41964	6.43282	6.47657	5.89636	5.5831	NaN	4.87886	5.94287	6.32849	6.41892	6.56856	6.27222	NaN	5.8237	5.49371
ARF4	P18085	ARF4	ADP-ribosylation factor 4	0.0164283	0.0347779	No	0	NaN	No	NaN	0	No	NaN	6.07817	5.35786	NaN	NaN	NaN	5.44764	5.91884	NaN	4.74976	NaN	NaN	NaN	NaN	NaN	NaN	NaN	NaN	NaN	NaN	6.33334	NaN	NaN	NaN	NaN	NaN	NaN	NaN	NaN	NaN	NaN	NaN	NaN	NaN
ARFGAP1	Q8N6T3	ARFG1	ADP-ribosylation factor GTPase-activating protein 1	0.178396	0.569269	No	0	NaN	No	0	NaN	No	NaN	NaN	4.22852	6.488	7.29855	NaN	4.21554	4.83411	6.99334	4.4798	NaN	NaN	NaN	NaN	NaN	NaN	NaN	6.38444	NaN	NaN	NaN	6.77646	NaN	NaN	NaN	NaN	NaN	NaN	6.41419	NaN	NaN	NaN	NaN	NaN
ARFGAP2	Q8N6H7	ARFG2	ADP-ribosylation factor GTPase-activating protein 2	0.9378	-0.278878	No	0.398079	0.137096	No	1.12184	0.391875	No	6.75216	7.09413	6.99945	6.62208	7.39271	7.46404	7.46179	6.85572	6.91411	7.55927	7.23997	6.71439	7.05073	6.70523	7.10731	7.31798	6.81791	6.66764	6.35119	7.01675	7.20162	7.25792	7.1185	7.00669	NaN	5.94915	7.46335	7.52955	6.47349	7.01383	6.21031	NaN	7.10832	6.95494
ARFGEF2	Q9Y6D5	BIG2	Brefeldin A-inhibited guanine nucleotide-exchange protein 2	0	-0.129149	No	0	0.95354	No	NaN	0	No	NaN	NaN	NaN	NaN	5.18458	NaN	6.79769	5.35501	5.06471	5.31373	NaN	NaN	NaN	5.58739	NaN	NaN	NaN	NaN	NaN	4.63385	5.04505	6.00739	NaN	NaN	NaN	NaN	NaN	NaN	NaN	NaN	NaN	NaN	NaN	NaN
ARFGEF3	Q5TH69	BIG3	Brefeldin A-inhibited guanine nucleotide-exchange protein 3	0.335161	-0.103934	No	0.102421	-0.0278176	No	0.290849	-0.201887	No	6.41886	6.89775	6.88945	6.48499	6.33191	6.97083	6.94462	6.68652	6.66034	6.28032	6.43409	NaN	5.98573	6.50172	6.84728	6.42899	6.39941	NaN	5.96638	6.42877	6.70432	6.83801	6.70291	6.4603	5.1929	NaN	6.06274	6.54774	6.85025	6.04503	6.23103	4.90582	6.67214	6.17756
ARG1	P05089	ARGI1	Arginase-1	0.624735	-0.948859	No	0.674961	0.946473	No	0.633325	1.00164	No	8.7884	9.62726	11.1449	11.9959	11.5015	12.0395	10.5425	11.7565	10.9646	12.4993	11.4513	12.5037	10.2842	11.4702	10.1778	9.87025	9.25952	9.07491	10.2291	10.4545	11.1076	9.95305	11.403	12.6687	11.4469	10.8562	12.0946	9.20388	11.3769	11.2013	7.91296	9.7457	10.3606	11.0658
ARHGAP1	Q07960	RHG01	Rho GTPase-activating protein 1	0.227409	0.379757	No	0.150799	0.0760393	No	0	NaN	No	7.26507	NaN	6.35212	7.17066	NaN	5.68444	6.64181	6.50981	7.45433	5.83588	NaN	NaN	6.22416	6.77491	NaN	6.62472	7.06336	NaN	6.17356	6.98884	6.24111	6.23327	NaN	6.47053	NaN	NaN	NaN	NaN	NaN	NaN	5.5593	NaN	NaN	NaN
ARHGAP23	Q9P227	RHG23	Rho GTPase-activating protein 23	0.284153	-0.224656	No	0.305793	-0.221408	No	0.77586	-0.336628	No	6.1782	NaN	6.80798	5.64928	6.00763	6.34897	6.46372	6.18221	6.39974	6.61079	5.9539	NaN	5.33611	5.76424	6.00778	5.78721	6.59568	NaN	4.56778	6.42674	5.85723	6.50885	NaN	6.1988	NaN	NaN	6.59491	NaN	NaN	6.62613	6.15437	5.372	6.84084	6.47314
ARHGAP26	Q9UNA1	RHG26	Rho GTPase-activating protein 26	0.00989935	0.0152311	No	0.0258808	-0.0233145	No	0	NaN	No	7.00991	NaN	6.32175	6.52316	6.19576	5.51284	7.13014	6.73505	7.14971	6.59207	NaN	NaN	7.03322	6.49947	7.17189	6.60326	NaN	NaN	NaN	6.82273	6.62651	6.89532	5.77263	NaN	NaN	NaN	NaN	NaN	NaN	NaN	NaN	NaN	NaN	NaN
ARHGAP35	Q9NRY4	RHG35	Rho GTPase-activating protein 35	0.0352085	-0.0212912	No	0.249013	0.0667467	No	0.277618	-0.277217	No	5.72018	4.8492	5.53475	5.94891	5.42387	5.13921	5.52046	5.71881	5.82375	5.38114	5.544	NaN	5.83096	6.10302	5.62832	5.1034	5.17603	NaN	5.69709	6.01357	5.59409	5.3952	5.35978	5.28672	NaN	NaN	NaN	NaN	5.33455	5.86638	5.66843	NaN	4.76672	5.16498
ARHGAP39	Q9C0H5	RHG39	Rho GTPase-activating protein 39	0.23942	0.309336	No	0.265119	-0.213781	No	0	NaN	No	8.58814	NaN	9.81559	8.77365	9.88629	6.83416	9.88884	10.2182	9.02566	9.74829	NaN	NaN	9.15445	9.39585	9.24927	9.24182	NaN	NaN	8.80582	NaN	9.5939	9.88716	NaN	8.26007	NaN	NaN	8.84305	NaN	9.44427	NaN	8.42634	NaN	NaN	NaN
ARHGAP44	Q17R89	RHG44	Rho GTPase-activating protein 44	0.661878	-0.419696	No	0.370457	-0.17942	No	0.143095	0.264777	No	5.96462	5.57641	5.95937	6.11748	6.57615	5.35107	6.59442	6.586	6.93066	6.83036	6.48337	NaN	6.01774	6.02738	6.18157	5.50527	5.98409	NaN	6.44901	6.41237	6.13167	6.1353	5.98308	6.24624	4.32369	NaN	5.69663	5.88331	5.91144	6.20424	6.38595	NaN	3.78029	4.52715
ARHGDIA	P52565	GDIR1	Rho GDP-dissociation inhibitor 1	1.82853	-0.354994	No	1.72116	-0.159254	No	0.657335	-0.203114	No	9.97715	10.7574	11.0253	10.7066	10.747	10.3908	11.0766	11.0618	11.2055	11.2536	9.78594	9.48623	10.5441	10.472	10.767	10.9107	9.88985	9.53644	10.6181	10.8279	10.9136	11.1355	10.2682	9.77734	9.88639	9.75121	10.1832	10.0656	10.7948	10.0302	10.4916	9.99842	10.0866	9.74908
ARHGDIB	P52566	GDIR2	Rho GDP-dissociation inhibitor 2	0.47608	-0.324698	No	0.0253152	0.0397952	No	0.799101	0.862882	No	5.57153	4.76332	6.11812	6.38596	6.61099	6.87501	5.28722	6.28201	5.87777	6.75141	6.42861	6.36912	5.63337	7.58644	5.55487	5.59676	NaN	NaN	6.12624	6.01194	6.17932	5.89478	6.88788	6.23948	5.87943	4.10413	6.35096	NaN	5.99825	6.06895	NaN	NaN	4.82248	5.65696
ARHGEF11	O15085	ARHGB	Rho guanine nucleotide exchange factor 11	0.38171	-0.221426	No	0.623238	-0.173734	No	0.394711	-0.0816231	No	6.80259	5.89748	6.81907	6.6916	6.76427	6.98934	7.03614	6.6161	6.85965	6.58091	6.51764	NaN	6.8873	6.58929	7.05957	6.97598	6.72022	7.0678	6.63164	7.12084	7.26555	7.16021	5.84724	6.75694	6.60905	NaN	6.83348	6.80078	6.19255	6.66492	6.77251	5.84307	6.70375	6.92187
ARHGEF18	Q6ZSZ5	ARHGI	Rho guanine nucleotide exchange factor 18	NaN	0	No	0	NaN	No	NaN	0	No	NaN	NaN	NaN	NaN	NaN	NaN	NaN	NaN	NaN	NaN	NaN	NaN	NaN	NaN	NaN	5.13851	NaN	NaN	NaN	NaN	NaN	NaN	NaN	NaN	NaN	NaN	NaN	NaN	NaN	NaN	NaN	NaN	NaN	NaN
ARHGEF2	Q92974	ARHG2	Rho guanine nucleotide exchange factor 2	0.718942	-0.170487	No	0.587605	-0.184714	No	0.119841	-0.120294	No	6.08575	7.47828	7.25452	6.5349	7.17457	6.34705	7.40865	7.22628	7.06545	7.33304	6.62707	5.79154	6.37598	6.84393	7.29486	6.93693	6.93377	NaN	6.21254	7.36447	7.16111	7.33046	5.88815	6.07769	NaN	NaN	6.84812	6.72915	6.451	6.4672	6.97017	6.56857	7.32476	5.78132
ARHGEF7	Q14155	ARHG7	Rho guanine nucleotide exchange factor 7	2.14941	-0.533037	No	2.90874	-0.266486	No	1.37835	-0.419916	No	5.94311	5.50427	6.02193	6.02205	5.93773	6.12354	6.33498	6.61571	6.59519	6.42485	5.72203	NaN	5.61767	6.16777	5.9694	6.18028	5.96045	4.9682	6.00356	6.44834	6.16607	6.41116	5.44549	5.85109	NaN	NaN	5.67612	5.2334	5.86913	6.34597	6.19026	NaN	5.76328	5.90739
ARID1A	O14497	ARI1A	AT-rich interactive domain-containing protein 1A	0	0.239787	No	NaN	0	No	0	NaN	No	NaN	NaN	NaN	NaN	6.90878	NaN	NaN	6.42454	NaN	6.66899	NaN	NaN	NaN	NaN	NaN	NaN	NaN	NaN	NaN	NaN	NaN	NaN	NaN	7.54073	7.62589	NaN	7.23134	NaN	NaN	NaN	NaN	NaN	NaN	NaN
ARMC6	Q6NXE6	ARMC6	Armadillo repeat-containing protein 6	1.1712	-1.01766	No	0	0.11816	No	0	NaN	No	NaN	NaN	3.61738	NaN	3.56387	NaN	NaN	4.52685	4.96318	4.68971	NaN	NaN	4.16098	NaN	NaN	4.34199	NaN	NaN	NaN	NaN	NaN	4.22383	NaN	4.24468	NaN	NaN	NaN	NaN	NaN	NaN	NaN	NaN	NaN	NaN
ARPC1A	Q92747	ARC1A	Actin-related protein 2/3 complex subunit 1A	0.843055	-0.544559	No	0.989409	-0.211174	No	0.237902	0.231899	No	5.93566	5.12183	5.96485	6.35976	5.99614	5.74846	6.43541	7.1646	6.52372	6.22884	5.75105	NaN	6.49288	5.87367	NaN	5.96616	6.16419	6.46398	6.46454	6.10205	6.25405	6.19767	6.22558	5.46612	NaN	NaN	4.69565	NaN	5.69643	5.53147	NaN	NaN	NaN	NaN
ARPC2	O15144	ARPC2	Actin-related protein 2/3 complex subunit 2	2.37472	-0.518005	No	0.219565	-0.0877477	No	0.435414	-0.224901	No	6.30983	5.97598	6.75444	6.08461	6.28842	6.70598	6.80209	7.06494	6.57481	6.85548	6.10981	5.0255	6.82638	6.21376	6.61974	6.78886	6.20622	5.68504	6.31276	6.50406	6.66779	6.73467	6.59975	6.04143	5.7716	6.12219	5.85052	6.72844	6.52638	6.84687	6.70515	5.64282	6.12964	6.61248
ARPC3	O15145	ARPC3	Actin-related protein 2/3 complex subunit 3	1.27291	-0.361028	No	0.887057	-0.201602	No	0.209556	-0.0555979	No	8.40998	8.75096	8.90631	9.16918	9.14131	8.84306	9.36051	8.77628	9.74079	9.46224	8.47959	7.58712	8.39352	9.02399	8.49872	9.12217	8.40839	7.47433	8.94265	9.19893	8.97675	9.31367	8.45899	8.46082	7.97837	7.56865	8.35078	8.12112	8.43593	8.186	8.48897	7.56497	8.43675	8.1597
ARPC4	P59998	ARPC4	Actin-related protein 2/3 complex subunit 4	0.577214	0.370592	No	0.0751245	0.0487336	No	0.717997	-0.27859	No	9.88951	10.3026	9.12426	9.4706	8.07499	9.91483	9.48447	8.6388	8.39225	8.57867	9.67227	8.73157	9.39382	9.03391	9.81671	9.40458	9.60293	9.2762	8.89145	9.59931	8.95708	9.43351	8.82337	8.49859	9.35511	9.56971	9.50935	9.90975	8.84651	9.43609	9.99209	9.46513	9.8942	9.70339
ARPC5L	Q9BPX5	ARP5L	Actin-related protein 2/3 complex subunit 5-like protein	0.528261	-0.328518	No	0.273034	0.0514507	No	NaN	0	No	NaN	NaN	7.53731	8.34861	7.32392	NaN	NaN	8.03082	NaN	7.48744	NaN	NaN	7.6006	8.06089	NaN	8.21494	NaN	NaN	7.49202	NaN	7.73507	8.22063	NaN	NaN	NaN	NaN	NaN	NaN	NaN	NaN	NaN	NaN	NaN	NaN
ARPP19	P56211	ARP19	cAMP-regulated phosphoprotein 19	0.380468	0.397696	No	0.209824	-0.22547	No	0	NaN	No	NaN	3.97676	5.93738	NaN	6.83327	NaN	NaN	5.8446	4.99689	6.13066	NaN	NaN	5.901	5.86708	4.44775	5.94236	NaN	NaN	4.94646	6.33334	5.34309	6.43718	NaN	NaN	NaN	NaN	4.667	NaN	NaN	NaN	NaN	NaN	NaN	NaN
ARRB1	P49407	ARRB1	Beta-arrestin-1	0.12673	0.0777632	No	0.183625	-0.0912022	No	0.109553	0.152578	No	5.92357	5.8829	6.86458	6.21532	6.37535	5.95788	5.79816	5.93848	6.54729	6.63108	5.64601	NaN	6.3024	5.76655	6.40718	6.07674	6.17406	NaN	5.76549	5.81694	6.38743	6.51096	6.27184	6.50109	NaN	NaN	6.76517	4.68105	5.98951	6.0335	6.18448	NaN	5.67365	5.91219
ASAH1	Q13510	ASAH1	Acid ceramidase	0.32934	-0.291146	No	0.035921	0.0476617	No	0.467658	0.342588	No	6.44931	5.17815	7.74044	7.23302	7.74132	6.71304	6.881	7.60776	6.96216	7.634	7.76421	7.03556	6.28624	6.76531	6.73475	6.34087	6.07289	NaN	7.26393	6.88127	7.19138	6.24361	6.98371	7.70204	6.33973	6.04509	6.81338	5.70438	7.17952	7.09648	6.18241	5.2758	5.31332	6.48527
ASNS	P08243	ASNS	Asparagine synthetase	0	0.630373	No	0.188663	0.129866	No	0	NaN	No	8.11822	7.44889	NaN	NaN	NaN	NaN	6.81851	NaN	NaN	NaN	7.86183	7.19641	7.1489	7.24428	6.40566	NaN	7.97197	NaN	NaN	6.62663	6.52357	6.17466	8.11546	NaN	NaN	NaN	NaN	6.95816	NaN	NaN	NaN	7.88367	NaN	NaN
ASPSCR1	Q9BZE9	ASPC1	Tether containing UBX domain for GLUT4	0.721546	0.715274	No	0.0873617	-0.101542	No	0.216334	-0.506924	No	5.34132	3.58144	5.91202	5.69701	5.41016	3.11684	4.18308	5.02915	5.09734	4.93917	6.05468	NaN	4.61954	5.75878	5.85465	5.1919	NaN	NaN	5.09092	6.33772	4.74677	5.65562	5.69739	NaN	5.69955	NaN	NaN	3.96321	5.48863	4.83061	NaN	NaN	3.78534	5.18582
ASRGL1	Q7L266	ASGL1	Isoaspartyl peptidase/L-asparaginase	0.384392	0.27918	No	0.451016	-0.290529	No	0.092672	-0.0231829	No	6.64196	7.26429	7.62732	7.79611	7.38046	5.32496	7.60717	7.91233	7.24932	7.22045	6.78413	5.9874	7.5663	7.11998	7.82969	7.50172	7.37739	7.41702	7.04528	7.5529	7.55868	7.58113	7.41432	7.13994	NaN	NaN	7.44372	6.90024	7.57675	NaN	7.46351	7.09251	7.47782	6.77327
ATAD3B	Q5T9A4	ATD3B	ATPase family AAA domain-containing protein 3B	0.144267	0.32481	No	0.43124	-0.650957	No	0.0921662	-0.283788	No	10.2996	7.6066	5.61348	6.52262	7.48648	8.21079	8.22688	8.09774	5.42056	5.94872	9.68003	NaN	8.44332	7.24896	NaN	7.08253	9.56203	9.42805	8.75433	9.00882	6.71755	NaN	7.04365	NaN	8.37066	10.8576	6.19166	8.25776	8.29217	NaN	NaN	8.31168	8.66801	8.214
ATAT1	Q5SQI0	ATAT	Alpha-tubulin N-acetyltransferase 1	0.0141513	-0.00618925	No	1.69414	-0.273159	No	0.315228	-0.281135	No	7.64678	7.56207	7.89055	8.05709	7.73113	7.52768	8.12728	7.64763	8.04738	7.56861	7.51589	6.59891	6.98569	7.72899	7.69162	7.94382	7.86081	6.74613	7.52163	8.1798	7.80826	7.98724	6.2416	7.07688	6.49047	NaN	7.74135	7.86591	7.38897	7.32812	7.37036	6.72774	7.81593	6.9185
ATCAY	Q86WG3	ATCAY	Caytaxin	0.163111	-0.0615837	No	1.31873	-0.310096	No	0.163711	-0.152025	No	7.90785	8.43552	7.71726	7.46871	7.65616	8.45274	8.14785	7.58421	7.49721	7.81141	7.84078	6.7475	7.18311	7.58625	7.99463	8.20751	7.85377	7.37068	7.64314	8.21245	8.04778	8.29254	6.49821	7.46039	NaN	7.50491	8.33761	8.93422	7.43761	8.12863	8.27437	7.42092	8.63767	7.87063
ATIC	P31939	PUR9	Bifunctional purine biosynthesis protein ATIC	0.116412	-0.0783098	No	1.10006	-0.214531	No	0.319715	-0.101307	No	7.86071	7.75709	7.61937	7.34002	7.62755	6.96757	8.18604	7.87488	7.63389	7.93391	7.73907	6.54663	7.4821	8.41052	7.88381	7.98552	7.76118	7.17089	7.80907	8.42622	7.93171	8.23577	7.80659	7.80596	7.13054	7.38307	7.43103	7.59193	7.73657	7.89951	7.60388	7.26754	7.93884	7.31062
ATL1	Q8WXF7	ATLA1	Atlastin-1	0.055377	0.0743626	No	0.838111	0.257891	No	0	-0.204833	No	5.1232	NaN	3.83829	4.50493	4.89916	3.70719	5.15427	4.26621	5.0345	5.06023	NaN	NaN	3.88976	4.2275	4.69708	4.83679	4.20192	NaN	3.94841	3.94684	4.1129	4.6114	4.98838	NaN	NaN	NaN	NaN	NaN	5.19321	NaN	NaN	NaN	NaN	NaN
ATP11B	Q9Y2G3	AT11B	Phospholipid-transporting ATPase IF	NaN	0	No	0	NaN	No	0	NaN	No	NaN	NaN	NaN	NaN	NaN	NaN	NaN	NaN	NaN	NaN	NaN	NaN	NaN	NaN	NaN	6.80718	NaN	NaN	7.92472	NaN	7.71023	NaN	NaN	NaN	NaN	NaN	NaN	NaN	NaN	NaN	NaN	6.59316	NaN	NaN
ATP1A1	P05023	AT1A1	Sodium/potassium-transporting ATPase subunit alpha-1	1.47147	-0.274085	No	1.32857	-0.28441	No	1.12438	-0.468623	No	12.002	12.1999	12.1178	11.8812	12.0752	12.2574	12.4315	12.15	12.4529	12.3546	11.6107	10.6694	11.6748	11.6846	12.2661	12.151	12.0265	11.2118	11.8823	12.1726	12.0822	12.3878	11.4538	11.3386	11.0775	10.9387	11.2265	11.8502	12.0542	11.9072	12.2342	10.9819	11.9517	11.5679
ATP1A2	P50993	AT1A2	Sodium/potassium-transporting ATPase subunit alpha-2	1.81723	-0.368213	No	1.57954	-0.283971	No	1.29736	-0.383869	No	9.97745	10.3033	10.4499	9.81387	10.2119	10.4001	10.8381	10.5218	10.3653	10.4723	9.64755	9.01098	10.2351	9.94386	10.1247	10.3188	10.1553	9.51901	10.2184	10.285	10.1758	10.6312	9.73268	9.79187	9.53485	9.53576	9.25163	9.84195	10.0483	10.4052	10.4071	9.48198	9.8149	9.83454
ATP1A3	P13637	AT1A3	Sodium/potassium-transporting ATPase subunit alpha-3	1.58373	-0.326889	No	1.68962	-0.293513	No	1.51525	-0.4995	No	13.7003	14.1015	14.1693	13.6555	14.044	14.0404	14.5191	14.2503	14.2778	14.2175	13.3383	12.7761	13.7333	13.5286	13.9486	14.076	13.8166	13.3234	13.7791	13.9147	13.9947	14.3336	13.3953	13.1274	13.0543	12.9142	12.9585	13.4881	13.9909	13.8452	14.1339	13.0787	13.4754	13.4108
ATP1B1	P05026	AT1B1	Sodium/potassium-transporting ATPase subunit beta-1	2.10963	-0.691778	No	2.52578	-0.369117	No	1.64453	-0.477291	No	8.89146	9.38251	10.1424	9.48091	10.1331	9.54562	10.2898	10.7383	10.5382	10.3774	8.95716	8.40908	9.29038	9.47638	9.96532	9.72775	9.48425	8.83229	9.53841	9.75421	10.1223	10.3093	9.29547	8.85607	8.65073	8.08918	8.88944	8.78778	9.69737	9.32666	9.76424	8.63129	9.19937	8.81349
ATP1B2	P14415	AT1B2	Sodium/potassium-transporting ATPase subunit beta-2	1.12024	-0.399064	No	0.838347	-0.288436	No	1.9288	-0.664498	No	7.80857	7.86283	8.18634	7.52266	7.82721	7.78243	8.63787	8.58599	8.29098	7.90565	7.73337	7.17498	8.00059	8.0136	8.57587	8.2036	8.14482	8.06362	8.1856	8.32428	8.19262	8.52169	6.83458	7.33982	7.29579	7.68695	7.36835	7.95856	7.69607	8.22053	8.38146	7.96591	8.24028	7.9668
ATP2A2	P16615	AT2A2	Sarcoplasmic/endoplasmic reticulum calcium ATPase 2	0.580465	-0.157816	No	0.0217001	0.00308259	No	0.542717	0.160359	No	10.0939	9.89416	10.1238	9.76968	9.86933	10.1094	10.27	10.0605	10.2887	9.81137	9.91768	8.90831	9.82372	9.57936	9.5643	10.0065	9.85076	9.08501	9.79291	9.63759	9.57853	9.83662	9.99378	9.46152	9.0419	9.48244	9.07563	9.14815	9.65322	9.33053	9.51449	9.05105	8.89002	8.80195
ATP2B1	P20020-1	AT2B1	Plasma membrane calcium-transporting ATPase 1	2.39198	-0.56223	No	1.70157	-0.318032	No	1.40061	-0.371881	No	9.95131	10.2819	10.706	10.1743	10.4225	10.4451	10.9809	11.0144	11.0227	10.884	9.57557	9.17823	10.2716	10.1991	10.2546	10.5503	10.2252	9.67045	10.278	10.5592	10.4559	10.7487	9.43644	9.39457	9.16727	9.09894	9.48119	9.45959	9.87777	9.69118	10.1095	9.39167	9.81554	9.38365
ATP2B2	Q01814-2	AT2B2	Plasma membrane calcium-transporting ATPase 2	1.06134	-0.302976	No	1.27607	-0.272497	No	2.0171	-0.394625	No	7.8053	8.19961	8.82134	8.26625	8.46522	7.81574	8.89789	8.93084	8.81021	8.61791	7.88607	7.36422	8.3077	8.18475	8.37089	8.46283	8.48035	7.94348	8.26829	8.402	8.41859	8.69873	7.73185	7.49149	7.53808	7.59007	7.6526	7.82432	7.99485	7.98908	8.29641	7.96083	8.08209	7.8729
ATP2B3	Q16720-2	AT2B3	Plasma membrane calcium-transporting ATPase 3	2.38361	-0.421547	No	0.865559	-0.232864	No	1.9058	-0.673006	No	8.57656	8.79792	8.6896	8.63732	8.58255	8.77845	9.28331	8.99638	9.18828	9.14525	8.09452	7.34957	8.56543	8.44942	8.87446	8.87784	8.44488	8.15319	8.65665	8.65259	8.74179	8.95931	7.89089	7.5734	7.37567	7.73631	7.87132	8.09258	8.56774	8.59169	8.584	8.48215	8.24425	8.10838
ATP2B4	P23634-2	AT2B4	Plasma membrane calcium-transporting ATPase 4	1.44026	-0.353251	No	2.20241	-0.437344	No	1.38194	-0.410563	No	8.69681	9.65346	9.25766	8.90211	9.11933	9.07854	10.0704	9.43076	9.63011	9.18579	7.84038	8.40075	8.78116	9.01712	9.09952	9.05423	8.57923	9.12734	9.03951	9.39287	9.42876	9.24951	8.51368	7.94022	7.72624	8.12372	8.52274	8.35527	8.69931	8.59037	8.58961	8.3939	9.15351	8.21855
ATP2C1	P98194	AT2C1	Calcium-transporting ATPase type 2C member 1	0.701242	1.04674	No	0	0.115237	No	0	NaN	No	6.45366	NaN	6.44981	NaN	6.2864	4.40691	NaN	6.31267	6.80202	5.33006	6.20565	NaN	NaN	NaN	NaN	6.60793	NaN	NaN	6.34689	NaN	5.99226	6.4927	NaN	NaN	NaN	6.55811	6.54048	NaN	6.42761	6.01321	NaN	NaN	NaN	NaN
ATP4A	P20648	ATP4A	Potassium-transporting ATPase alpha chain 1	1.43035	-0.466029	No	1.74177	-0.440001	No	1.64347	-0.445004	No	9.63807	9.6857	9.81782	9.95642	9.85383	9.64682	10.4742	10.0477	10.7123	10.401	8.91697	8.90951	9.37709	9.57338	9.67858	10.2712	9.9735	9.36282	9.63857	9.90029	9.99516	10.4964	9.21065	8.93595	8.7106	NaN	8.81786	9.02272	9.78796	9.62852	9.2306	9.18958	9.27779	8.99794
ATP5F1A	P25705	ATPA	ATP synthase subunit alpha, mitochondrial	0.0632627	-0.015274	No	0.110782	-0.0297715	No	0.0304073	-0.0119974	No	14.9925	15.2098	14.8358	14.5361	14.397	15.0586	15.122	14.6504	14.8443	14.3722	14.7965	14.2152	14.7493	14.737	14.9755	14.7271	14.8338	14.6372	14.6384	14.8428	14.6704	14.7566	14.4741	14.7319	14.4385	14.8446	14.2812	15.0769	14.4947	14.8894	14.843	14.555	14.5217	14.6154
ATP5F1B	P06576	ATPB	ATP synthase subunit beta, mitochondrial	1.21524	-0.215689	No	0.417924	0.0628517	No	0.0492575	0.0169544	No	13.6282	13.5183	13.7728	13.6644	13.4773	13.8149	13.955	13.7991	14.0424	13.5281	13.2577	12.9975	13.4424	13.6655	13.9149	13.5428	13.4185	12.985	13.3058	13.6498	13.5901	13.4945	13.4533	13.5119	12.8795	13.2899	13.2463	13.5673	13.3723	13.3312	13.2517	13.1023	13.5636	13.2254
ATP5F1C	P36542	ATPG	ATP synthase subunit gamma, mitochondrial	1.75508	-0.473541	No	0.318725	-0.0611499	No	0.315575	-0.0873	No	9.25522	8.70836	9.49537	8.90716	8.6167	9.82185	9.6136	9.79658	9.13979	8.97869	8.92573	8.93693	9.01606	8.7459	8.70735	8.96464	9.00685	9.07506	8.90323	8.6789	9.11478	8.8847	9.08117	9.21411	8.60523	8.58885	8.52684	8.68787	9.20255	8.85109	9.09606	8.79569	8.48045	8.80202
ATP5F1D	P30049	ATPD	ATP synthase subunit delta, mitochondrial	0.0900491	0.0483238	No	0.578039	0.202437	No	0.316482	0.119144	No	10.7256	10.4357	10.6338	10.0477	9.70951	10.9383	10.8614	10.2729	10.1416	9.09646	10.3808	10.6536	10.6132	10.0753	10.5358	10.3361	10.553	10.518	9.72855	10.1842	10.1134	10.283	10.4285	10.5232	10.5444	10.7943	10.2607	10.6808	10.2835	10.7471	10.3964	10.2297	10.6734	10.187
ATP5IF1	Q9UII2	ATIF1	ATPase inhibitor, mitochondrial	1.68073	0.447152	No	0.386277	-0.42641	No	0.482288	-0.398466	No	8.54706	8.16894	7.14449	7.26011	7.53887	7.79406	7.92052	6.53322	7.16714	7.00877	6.57652	5.06979	6.93471	6.78098	8.47927	7.90463	6.42235	7.09142	7.18724	8.34721	7.36368	7.89246	6.84027	6.2763	7.47066	6.28725	7.22485	8.21347	7.6919	7.73419	8.00944	5.90875	8.12015	7.23917
ATP5ME	P56385	ATP5I	ATP synthase subunit e, mitochondrial	1.74039	0.747013	Yes	0.0566128	0.0396042	No	0.893932	-0.531191	No	10.3384	10.5731	9.22634	8.55902	8.80981	10.3521	9.53105	8.2426	7.66644	7.97939	9.64112	9.19453	9.38974	8.66204	9.64968	9.73441	9.732	9.78369	8.48726	9.2466	9.11005	9.67428	9.89995	8.34474	9.85616	9.50079	8.56248	NaN	10.0233	9.87888	10.4601	9.43865	9.01916	NaN
ATP5MF	P56134-2	ATPK	ATP synthase subunit f, mitochondrial	0.787478	-0.404654	No	0.136617	-0.0391424	No	0.427579	-0.203227	No	8.71711	8.27328	7.61134	6.53279	5.74085	8.48615	8.31426	7.98958	7.62593	6.48272	7.5548	7.48509	7.19636	7.5781	7.52598	7.59456	7.47035	7.29745	7.06999	7.70649	8.05421	7.57125	7.61446	7.9352	7.74827	8.13013	7.68273	8.59493	7.59776	8.61415	8.40919	7.79564	8.3032	8.20513
ATP5MG	O75964	ATP5L	ATP synthase subunit g, mitochondrial	0.190394	-0.371883	No	0.318606	-0.19076	No	0	NaN	No	NaN	5.28419	3.6545	NaN	5.92122	NaN	5.12394	5.4001	6.01468	5.45152	NaN	NaN	NaN	5.79422	NaN	5.9353	NaN	NaN	5.34358	5.80575	6.30325	6.30529	NaN	NaN	NaN	NaN	6.5498	NaN	NaN	5.77323	NaN	NaN	NaN	NaN
ATP5MK	Q96IX5	ATPMK	ATP synthase membrane subunit K, mitochondrial	0.307913	-0.421454	No	0.0166949	-0.0128315	No	0	-0.0216284	No	NaN	NaN	6.44958	8.1908	7.9188	NaN	4.37483	7.28221	NaN	7.92908	NaN	6.37451	NaN	6.52604	7.55206	7.49409	NaN	NaN	NaN	6.98175	7.18127	7.44765	7.32537	NaN	NaN	NaN	NaN	NaN	7.347	6.35423	NaN	NaN	NaN	NaN
ATP5PB	P24539	AT5F1	ATP synthase F(0) complex subunit B1, mitochondrial	0.593542	-0.80038	No	0.0889206	-0.059582	No	0.33202	0.251768	No	NaN	5.83467	7.13874	NaN	7.01713	2.24686	7.56412	7.82499	7.22756	7.00257	6.23706	6.80319	6.544	7.42868	7.08494	6.54443	6.48608	NaN	6.84627	6.5377	7.44011	6.82687	6.97498	7.20523	6.0199	NaN	NaN	6.34159	6.69234	6.48197	6.27049	NaN	6.69658	NaN
ATP5PD	O75947	ATP5H	ATP synthase subunit d, mitochondrial	1.30594	-0.399761	No	0.913572	0.271195	No	0.538357	0.316222	No	5.83749	5.65331	6.82174	6.29876	6.39325	6.35221	6.56078	6.98954	6.57466	6.52617	4.82435	6.12795	5.90928	6.05782	6.15769	6.35643	4.7996	5.73025	6.07223	5.65539	5.31028	6.2386	7.20425	5.73482	6.81954	4.45231	5.5063	5.67284	6.90093	5.49339	7.10204	NaN	4.23695	5.62333
ATP5PF	P18859	ATP5J	ATP synthase-coupling factor 6, mitochondrial	0.754012	-0.406858	No	0.277284	-0.0429605	No	0.210613	-0.0687429	No	6.24869	5.4882	6.94981	6.25275	7.0994	6.01267	6.65555	7.38217	6.92514	7.09761	6.43523	NaN	5.99602	6.2184	6.35053	6.59405	6.37661	NaN	6.03609	6.38276	6.22331	6.79026	6.53137	6.51752	6.28366	6.23697	6.08901	5.85757	6.79351	6.17332	6.65823	NaN	6.02826	5.96951
ATP5PO	P48047	ATPO	ATP synthase subunit O, mitochondrial	1.64097	-0.30185	No	0.0925447	-0.0312452	No	0.0410468	-0.025636	No	9.36894	9.34074	9.10687	8.852	8.31011	9.65574	9.604	9.12597	9.35914	8.74305	8.91206	8.62207	9.10215	8.99646	9.37124	9.20606	9.24327	9.06413	8.87234	9.05984	9.12586	9.03208	8.65516	8.98035	8.73051	9.26352	8.58134	9.51534	8.88224	9.37882	9.14151	8.63872	8.9957	8.84303
ATP6V0A1	Q93050	VPP1	V-type proton ATPase 116 kDa subunit a 1	2.05601	-0.581445	No	1.79797	-0.296536	No	1.69484	-0.437336	No	9.96456	10.0075	10.498	10.4438	10.461	10.5118	10.8748	10.8791	11.2927	10.7236	9.62045	8.9965	10.0074	10.4117	10.5925	10.4764	10.1733	9.4626	10.075	10.7265	10.6476	10.7992	9.77944	9.82684	9.14023	8.81915	10.0084	9.94982	10.367	10.0058	9.93999	9.3546	10.599	9.8816
ATP6V0D1	P61421	VA0D1	V-type proton ATPase subunit d 1	2.20435	-0.643727	No	2.26275	-0.254544	No	0.880766	-0.418951	No	9.63207	9.54629	10.3966	10.3091	10.6274	10.2159	10.5437	10.8659	11.1512	10.9534	9.51719	8.85021	9.66454	10.3294	10.2198	10.5572	9.74623	9.26431	9.92162	10.3726	10.5994	10.7615	9.95779	9.59914	8.53166	7.54927	9.62284	9.35347	10.0005	9.46081	9.56964	8.78255	9.78596	9.52841
ATP6V0D2	Q8N8Y2	VA0D2	V-type proton ATPase subunit d 2	0	NaN	No	0	NaN	No	0	NaN	No	NaN	NaN	NaN	NaN	NaN	NaN	NaN	4.57782	5.41751	NaN	NaN	NaN	NaN	4.6274	NaN	NaN	NaN	NaN	NaN	NaN	NaN	NaN	NaN	NaN	NaN	NaN	NaN	NaN	5.63816	NaN	NaN	NaN	NaN	NaN
ATP6V1A	P38606	VATA	V-type proton ATPase catalytic subunit A	1.5302	-0.305573	No	1.60167	-0.174181	No	0.563531	-0.169509	No	12.2714	12.4959	12.7493	12.3742	12.3743	12.7678	13.0169	12.7779	12.6462	12.5841	12.1991	11.7429	12.3648	12.3819	12.6398	12.3518	12.4808	12.0902	12.4476	12.5029	12.6254	12.5785	12.2267	12.1066	11.6062	11.8145	12.0551	12.3297	12.3579	12.3374	12.2987	11.6779	12.3944	12.0895
ATP6V1B2	P21281	VATB2	V-type proton ATPase subunit B, brain isoform	1.03363	-0.210791	No	1.21048	-0.205379	No	0.856737	-0.248999	No	11.5536	11.8964	11.8075	11.5464	11.5053	11.7945	12.1843	11.7264	12.0423	11.6157	11.3326	10.9693	11.4762	11.4966	11.8682	11.7087	11.5244	11.5115	11.6794	11.7891	11.7827	11.7967	11.1044	11.246	11.0602	10.9328	11.2141	11.5862	11.3422	11.3434	11.7843	11.1678	11.7065	11.2934
ATP6V1C1	P21283	VATC1	V-type proton ATPase subunit C 1	1.9002	-0.379412	No	0.896339	-0.156234	No	0.682223	-0.278943	No	7.88409	8.0253	8.10432	7.58368	8.11836	8.34186	8.46283	8.48625	8.15444	8.16743	7.46378	7.23367	7.55497	7.76622	7.89253	7.86644	7.68126	7.64567	7.70011	7.60396	7.89993	8.1841	7.55393	6.82028	6.8829	6.85886	7.35066	7.24471	7.69691	7.69979	7.75107	6.85796	7.32168	7.05759
ATP6V1D	Q9Y5K8	VATD	V-type proton ATPase subunit D	1.32774	-0.320668	No	1.73868	-0.249889	No	0.930891	-0.289555	No	10.1726	10.2491	10.2576	10.0935	9.62351	10.8059	10.7661	10.2697	10.3584	9.79948	10.1348	9.605	9.9261	10.1903	10.4515	9.90633	10.5542	10.1062	10.0015	10.3368	10.5457	10.1689	9.65373	9.8742	9.27252	9.45912	10.1583	10.362	9.49319	10.2693	10.1838	9.85312	10.3559	10.3618
ATP6V1E1	P36543	VATE1	V-type proton ATPase subunit E 1	0.691301	-0.202873	No	1.06294	-0.258045	No	0.130448	-0.0640984	No	10.61	10.8741	11.327	10.7277	10.7469	10.8476	11.4278	11.0519	10.984	10.9887	10.1993	9.69908	10.4559	10.7072	10.6174	10.8043	10.8239	10.2472	10.5694	10.5515	10.939	10.9004	10.4744	10.5179	9.99827	9.81054	10.4205	10.4815	10.6531	10.6136	10.8191	9.77954	10.2851	9.93725
ATP6V1G1	O75348	VATG1	V-type proton ATPase subunit G 1	0.24583	-0.138842	No	0.384445	-0.14561	No	0.555496	0.807934	No	6.32386	NaN	6.54074	6.87658	6.83494	6.17478	6.69044	7.24873	6.6313	7.07668	5.94058	NaN	6.35928	6.81893	6.74613	6.70336	NaN	NaN	6.72872	6.91258	6.47799	7.09086	6.74584	6.4851	NaN	NaN	6.65006	6.00427	6.31545	NaN	NaN	NaN	5.46458	NaN
ATP6V1G2	O95670	VATG2	V-type proton ATPase subunit G 2	0.42908	-0.117644	No	0.959635	-0.249158	No	1.13039	-0.478279	No	9.44736	9.79884	9.73658	8.88647	9.89793	9.63381	9.98082	9.45363	9.32447	9.96268	9.01755	7.67002	9.17538	8.98918	9.74137	9.46255	9.10069	8.30876	9.35482	9.58908	9.56629	9.63135	9.21617	8.98151	8.24737	7.20325	8.84423	8.8261	9.77554	9.69565	9.18515	8.03041	9.16268	8.33887
ATP6V1H	Q9UI12	VATH	V-type proton ATPase subunit H	1.30176	-0.27603	No	0.475682	-0.0989175	No	0.517647	-0.273514	No	11.4102	11.7963	11.5564	11.5772	11.4394	11.95	11.8846	11.7832	11.6279	11.914	10.9832	10.5574	11.5164	11.1861	11.0648	11.4308	11.1385	10.7277	11.2319	11.3383	11.4636	11.4323	11.2097	10.4951	10.739	10.6254	10.4948	11.2996	10.9968	11.3639	11.5518	11.1175	10.7842	10.6905
ATP8A1	Q9Y2Q0	AT8A1	Phospholipid-transporting ATPase IA	3.00717	-0.667198	No	0.92721	-0.273402	No	0.0335761	-0.0155128	No	7.63752	7.71232	7.81679	7.80414	7.5898	8.15389	8.6502	8.54906	8.34971	8.19369	7.06002	6.54902	7.40466	7.88477	7.57431	7.664	7.86152	7.05623	7.43324	7.69102	7.72602	8.00915	7.23157	7.53002	6.95744	6.45645	7.4989	7.37936	7.57543	7.46403	7.50927	6.15966	7.54207	6.89636
ATP8A2	Q9NTI2	AT8A2	Phospholipid-transporting ATPase IB	1.06231	-0.731727	No	0.17396	-0.111192	No	0	NaN	No	7.23333	4.25834	4.55706	7.27224	7.56278	NaN	5.78205	4.74084	8.05422	8.0002	6.68787	NaN	7.65568	6.76086	6.61283	7.13648	NaN	NaN	NaN	6.42936	7.01407	7.40031	NaN	6.13863	NaN	NaN	NaN	NaN	NaN	NaN	NaN	NaN	7.69334	NaN
ATP9A	O75110	ATP9A	Probable phospholipid-transporting ATPase IIA	0.650123	-0.217716	No	0.147147	0.0353153	No	0.0224758	0.0237416	No	6.88584	7.12592	6.51598	7.0383	7.122	7.60658	6.9474	6.7667	7.32311	7.13282	7.54262	NaN	6.61684	6.86907	7.23133	7.12579	7.40399	NaN	6.6775	7.07449	7.24415	6.80895	6.81934	6.86692	6.5205	NaN	6.96856	7.36552	6.75466	7.22335	NaN	5.93419	7.55946	6.38791
ATPAF1	Q5TC12	ATPF1	ATP synthase mitochondrial F1 complex assembly factor 1	0.0887876	0.0398719	No	0.220228	-0.180777	No	0.520027	-0.628937	No	NaN	6.34808	5.81843	NaN	5.79112	NaN	6.60278	5.58343	6.41514	5.65181	NaN	NaN	5.31959	6.04887	6.4231	6.29919	6.24625	NaN	6.28172	6.44623	6.16791	5.91798	4.96278	6.05315	NaN	NaN	6.05613	NaN	5.91464	NaN	NaN	NaN	6.36214	NaN
ATXN10	Q9UBB4	ATX10	Ataxin-10	0.137449	-0.139505	No	0.534148	0.354342	No	0.131359	0.34791	No	8.08618	7.39686	7.01117	8.29997	7.46835	7.3217	7.43826	8.04251	7.72547	8.43213	7.49421	8.45695	7.15615	7.71368	6.93148	7.03639	7.6238	6.74536	7.10999	7.16586	7.29141	6.72639	NaN	8.78912	NaN	7.42993	NaN	6.95379	NaN	7.64071	6.7503	7.88252	NaN	NaN
ATXN2L	Q8WWM7	ATX2L	Ataxin-2-like protein	0.805776	0.406614	No	0.171388	0.211953	No	0	-0.620835	No	5.44433	NaN	6.43494	6.03467	5.82566	5.3583	4.98137	5.7717	5.15476	5.82838	NaN	NaN	NaN	6.4873	NaN	6.39009	NaN	NaN	4.75769	5.89837	NaN	6.55511	NaN	5.82558	NaN	NaN	5.53087	NaN	NaN	NaN	NaN	NaN	6.15171	NaN
AUH	Q13825	AUHM	Methylglutaconyl-CoA hydratase, mitochondrial	0.0726364	0.0632485	No	0.0618371	-0.0254838	No	0.0941986	-0.0572122	No	9.47205	9.01306	8.90357	NaN	7.58026	8.66904	8.96038	8.84503	7.74512	8.24149	8.31029	8.16746	8.78111	8.33118	7.84871	8.33534	8.73663	8.37229	8.22752	8.30975	8.11886	8.16194	8.79784	8.62085	8.04831	8.9031	8.61236	8.81354	8.56547	8.95894	8.62079	8.43226	9.28939	8.27243
AVL9	Q8NBF6	AVL9	Late secretory pathway protein AVL9 homolog	1.18962	-0.621392	No	2.83314	-0.470346	No	0.124096	-0.147223	No	7.04331	6.87807	7.57227	7.16279	7.70921	7.17546	8.23605	8.07231	8.16912	7.81967	6.37671	5.90654	7.09575	7.28585	6.92705	7.15736	6.99645	6.27802	7.42309	7.58888	7.6889	7.596	6.24464	6.01514	NaN	6.34928	6.88112	6.74017	7.38871	6.52909	6.42124	NaN	6.57166	5.9805
AZGP1	P25311	ZA2G	Zinc-alpha-2-glycoprotein	0.529881	-0.747614	No	0.117037	0.263809	No	0.609862	0.859277	No	7.4558	7.89651	9.54383	10.3573	10.5544	10.2694	8.95466	9.79506	9.34577	11.181	10.7875	10.9868	8.50298	9.53113	8.16037	8.77845	8.35234	8.2246	10.5249	9.11036	9.9705	8.98164	9.47091	10.8426	9.33758	9.59186	10.7321	8.03322	9.94495	9.31684	7.3524	8.06678	8.4053	9.76636
AZU1	P20160	CAP7	Azurocidin	0	NaN	No	0	NaN	No	0	NaN	No	NaN	NaN	NaN	4.71182	NaN	NaN	NaN	5.27312	NaN	5.73423	NaN	5.29763	NaN	NaN	NaN	NaN	NaN	NaN	NaN	NaN	6.65608	NaN	NaN	NaN	NaN	NaN	5.43397	NaN	NaN	NaN	NaN	NaN	NaN	NaN
B2M	P61769	B2MG	Beta-2-microglobulin	0	NaN	No	NaN	0	No	0	NaN	No	NaN	NaN	NaN	NaN	NaN	5.35627	NaN	NaN	NaN	5.55555	NaN	NaN	NaN	NaN	NaN	NaN	NaN	NaN	NaN	NaN	NaN	NaN	NaN	5.04144	NaN	NaN	NaN	NaN	5.19673	NaN	NaN	NaN	NaN	NaN
B4GAT1	O43505	B4GA1	Beta-1,4-glucuronyltransferase 1	0.307766	0.0962996	No	0.370481	-0.183899	No	0	NaN	No	6.11675	NaN	NaN	7.17324	6.42931	NaN	5.87558	6.67109	7.17094	6.23901	NaN	NaN	NaN	6.54232	6.57674	6.65799	6.57186	NaN	6.71106	6.78339	7.04961	6.49574	NaN	NaN	NaN	NaN	6.88405	NaN	NaN	6.08047	NaN	NaN	NaN	NaN
BAG6	P46379	BAG6	Large proline-rich protein BAG6	0.0616569	-0.0270471	No	0.447971	-0.121913	No	0.968546	-0.404413	No	6.92124	7.41646	7.19298	6.90244	7.00662	6.98791	7.38338	6.70331	7.04441	7.45595	6.62877	6.51538	6.76679	7.27655	6.96422	6.97769	7.22436	6.86098	6.80699	7.26559	6.75216	6.95082	6.11661	6.42479	6.68951	6.95963	7.17396	6.75869	6.90131	7.27366	7.61458	7.02103	7.22884	6.51023
BAIAP2	Q9UQB8	BAIP2	Brain-specific angiogenesis inhibitor 1-associated protein 2	0.954404	-0.184587	No	1.17681	-0.253391	No	0.604726	-0.17627	No	6.55255	6.9204	6.99645	6.70917	6.61356	6.52972	7.21378	7.19209	6.70832	7.07117	5.72716	5.71985	6.55675	6.6205	6.54797	6.90228	6.11331	6.37466	6.41694	6.7932	6.84445	7.0523	6.15002	6.04338	6.28733	4.98102	6.59943	6.17934	5.92487	6.57002	6.40705	5.60581	6.61735	6.17305
BANF1	O75531	BAF	Barrier-to-autointegration factor	1.32299	0.654443	Yes	0	1.0399	No	0	NaN	No	6.03489	5.33034	NaN	5.3689	5.39188	5.50918	4.31346	3.50086	5.2261	4.4595	6.82992	5.42418	5.93878	5.95369	5.56562	5.31921	NaN	NaN	NaN	NaN	4.52572	NaN	7.24168	5.7947	NaN	NaN	NaN	NaN	NaN	NaN	NaN	NaN	NaN	NaN
BASP1	P80723	BASP1	Brain acid soluble protein 1	1.62658	-0.4621	No	0.948602	-0.275879	No	0.367788	-0.14306	No	10.9985	11.777	13.1584	12.7984	12.7494	11.6068	12.6409	13.2489	13.151	13.1448	10.7051	12.3362	12.2273	11.3634	11.7422	13.1556	11.0865	12.7611	12.2426	11.1823	12.5662	13.3465	12.7481	10.6306	12.4161	11.3216	10.9544	10.9325	12.9497	10.9192	13.0612	11.6501	10.897	10.3845
BAX	Q07812	BAX	Apoptosis regulator BAX	0.839391	0.503269	No	0.204997	-0.082629	No	0.0962026	-0.0467876	No	7.74561	7.05484	7.71055	7.38416	7.27535	6.64684	7.56646	6.96856	7.00306	6.46923	7.09415	5.96493	6.98534	7.05516	7.454	7.42534	7.33294	6.31567	6.9937	7.6128	6.92044	7.29914	7.27553	6.68238	NaN	6.5438	6.56874	5.75823	7.08582	7.26244	6.62116	6.16932	6.87772	5.66733
BBOX1	O75936	BODG	Gamma-butyrobetaine dioxygenase	0.151404	-0.27542	No	0.517423	-0.26139	No	0.297041	-0.218511	No	6.75794	5.0854	NaN	6.1682	5.89826	5.41791	6.89942	7.0973	6.10061	6.59353	NaN	NaN	NaN	6.47292	5.53673	6.25841	NaN	NaN	6.21138	6.481	6.17141	6.39982	7.4404	7.07744	5.267	NaN	6.49989	6.89478	7.4959	7.31327	6.57113	NaN	5.98976	6.90201
BCAN	Q96GW7	PGCB	Brevican core protein	1.04698	-0.263154	No	0.927165	-0.189163	No	0.578917	-0.242407	No	9.05605	9.69632	9.83267	9.33781	9.42037	9.40534	10.0516	9.84312	9.95151	9.40746	9.34305	8.49239	9.22293	9.64866	9.69675	9.46138	9.71715	8.99205	9.33605	9.91731	9.50367	9.53391	8.91301	9.11645	9.17904	9.02802	9.24639	9.28825	9.02496	9.63997	10.0267	9.15538	9.63294	8.74568
BCAS1	O75363	BCAS1	Breast carcinoma-amplified sequence 1	0.531325	0.241245	No	0.489084	-0.245751	No	1.29774	-0.659239	No	5.22816	5.73013	5.71108	5.35713	5.20418	5.26585	5.398	5.40699	4.46071	5.49288	5.66897	5.15522	NaN	NaN	5.77907	4.66633	5.79955	5.47735	4.83903	5.14882	5.54232	5.43338	4.75617	4.38276	5.57456	NaN	5.4079	4.96174	5.72978	5.49489	6.10116	5.94075	5.19725	5.85625
BCAS3	Q9H6U6	BCAS3	BCAS3 microtubule associated cell migration factor	1.31174	-0.364737	No	0.497225	-0.242425	No	0.404573	-0.512966	No	6.46489	6.78827	6.16048	6.96061	6.80397	7.27211	7.05001	6.65978	7.05401	6.966	5.5381	5.50555	6.1072	6.58307	6.50761	6.06978	6.484	NaN	5.84425	6.53453	6.61394	6.54116	5.81931	6.21387	NaN	NaN	6.3958	5.58001	6.69755	6.36156	6.12355	6.92954	NaN	NaN
BCAT1	P54687	BCAT1	Branched-chain-amino-acid aminotransferase, cytosolic	0.21047	0.438215	No	0.179177	-0.540853	No	0	NaN	No	NaN	NaN	4.98893	NaN	3.73805	3.76884	4.35449	3.9147	4.11941	3.93586	2.29222	3.75991	NaN	4.33153	NaN	2.4311	3.92672	NaN	NaN	2.74324	NaN	4.00743	NaN	NaN	NaN	NaN	2.66055	NaN	NaN	NaN	3.56678	NaN	NaN	NaN
BCKDHA	P12694	ODBA	2-oxoisovalerate dehydrogenase subunit alpha, mitochondrial	0	-0.23785	No	0.504244	0.284366	No	0	NaN	No	NaN	NaN	7.18299	NaN	NaN	NaN	7.66845	7.42084	7.06334	7.14041	NaN	NaN	NaN	7.37411	NaN	7.18649	NaN	NaN	7.10775	6.93737	7.10456	7.05449	7.37399	NaN	NaN	NaN	NaN	NaN	NaN	6.69568	NaN	NaN	NaN	NaN
BCL2L1	Q07817	B2CL1	Bcl-2-like protein 1	0	3.32662	No	0	0.437652	No	NaN	0	No	NaN	NaN	NaN	NaN	6.66176	NaN	4.59534	2.96912	NaN	3.33514	5.96468	NaN	NaN	5.77021	NaN	NaN	5.52703	NaN	5.2403	NaN	NaN	NaN	NaN	NaN	NaN	NaN	NaN	NaN	NaN	NaN	NaN	NaN	NaN	NaN
BCL2L13	Q9BXK5	B2L13	Bcl-2-like protein 13	0.535828	1.01731	No	0	0.589596	No	0	NaN	No	NaN	NaN	NaN	6.79185	6.56213	NaN	NaN	5.07249	6.27526	5.04408	NaN	NaN	NaN	7.73148	NaN	NaN	6.48461	NaN	NaN	7.14188	NaN	NaN	5.11452	NaN	NaN	NaN	NaN	NaN	NaN	NaN	NaN	NaN	NaN	NaN
BCL2L2	Q92843	B2CL2	Bcl-2-like protein 2	0.518758	0.637865	No	0.0605854	0.0659874	No	0	-0.590719	No	6.59539	5.63514	4.91902	NaN	5.44264	5.18765	5.47444	5.50173	5.21499	3.8769	NaN	NaN	NaN	5.61198	6.08852	5.72453	NaN	NaN	NaN	5.67777	5.35193	6.19736	NaN	5.2369	NaN	6.14554	5.98722	NaN	NaN	5.82762	NaN	NaN	NaN	NaN
BCLAF1	Q9NYF8	BCLF1	Bcl-2-associated transcription factor 1	0.445923	0.629772	No	0	1.86507	No	0	0.870421	No	5.69099	6.21042	4.87159	4.47638	5.20391	NaN	4.51833	NaN	4.43086	5.05221	5.65222	6.53156	5.19509	6.21787	5.59999	6.02418	NaN	NaN	NaN	4.3528	NaN	NaN	4.12872	5.43321	5.7838	6.06534	5.5827	4.61695	NaN	NaN	4.91338	NaN	NaN	NaN
BCR	P11274	BCR	Breakpoint cluster region protein	0.255831	-0.255471	No	0.271453	-0.181985	No	0	0.887559	No	6.90748	6.08125	7.03047	NaN	7.10492	6.64757	7.45577	7.18756	7.20555	6.85511	NaN	NaN	6.96883	7.17691	6.4071	7.16361	7.31333	NaN	6.87126	7.12394	7.37039	7.07879	NaN	6.28383	NaN	NaN	NaN	6.81546	6.25857	NaN	5.7767	5.90056	NaN	5.9279
BDH1	Q02338	BDH	D-beta-hydroxybutyrate dehydrogenase, mitochondrial	0.614208	-0.523735	No	2.07118	-0.379029	No	0.10692	0.0654863	No	7.81907	7.1645	7.50028	6.36415	6.61714	6.89001	7.91231	8.53953	7.5982	7.14376	7.18636	6.95331	7.00894	6.96599	7.08483	6.89341	7.44964	7.54027	7.39784	7.13307	7.78017	7.06604	7.59	7.50915	6.68534	8.50844	7.68748	NaN	7.82584	7.73891	7.09445	7.89625	7.09753	7.02185
BDH2	Q9BUT1	DHRS6	Dehydrogenase/reductase SDR family member 6	0.419441	-0.164667	No	0.548623	-0.243855	No	0.884172	0.41375	No	5.67674	6.06744	5.6173	5.5564	5.71628	6.29314	6.15642	5.88201	5.14644	5.97948	5.96795	5.14725	5.49276	5.1474	5.40458	6.05256	5.82672	NaN	6.21211	5.87416	5.38922	5.98233	6.34651	6.2476	6.00267	5.86778	NaN	NaN	5.67431	6.31574	5.75705	5.06244	NaN	5.58048
BEGAIN	Q9BUH8	BEGIN	Brain-enriched guanylate kinase-associated protein	1.17249	1.00884	No	0.167718	0.10293	No	0	NaN	No	6.16077	8.03109	5.87014	7.02456	7.40937	4.96761	6.11312	5.70328	7.0559	5.61181	6.17851	NaN	NaN	6.86342	6.51855	7.21583	5.49872	NaN	5.68313	6.69524	6.92291	7.24773	6.92055	NaN	NaN	NaN	NaN	NaN	NaN	5.14986	NaN	5.71298	6.25914	7.20997
BID	P55957	BID	BH3-interacting domain death agonist	0.217789	-0.874577	No	0.281281	0.0923459	No	0	NaN	No	NaN	NaN	1.3968	5.17064	6.32122	4.7907	3.72373	4.77747	6.02483	4.71008	1.96562	NaN	5.20701	6.56198	NaN	5.59182	NaN	NaN	5.34405	6.29147	6.2267	5.44826	NaN	NaN	NaN	NaN	NaN	NaN	5.79929	NaN	NaN	NaN	NaN	NaN
BIN1	O00499	BIN1	Myc box-dependent-interacting protein 1	2.3883	-0.337549	No	1.02782	-0.227673	No	1.58293	-0.459822	No	10.1075	10.3954	10.5477	10.3293	10.3007	10.3465	10.8756	10.7726	10.8012	10.5724	9.93918	9.31915	10.1612	9.91553	10.2918	10.6163	9.94163	9.92176	10.2537	10.4564	10.3157	10.72	9.86561	9.2082	9.50907	9.57464	9.58502	9.71498	10.3397	9.84083	10.4291	9.67778	10.2449	9.68414
BIRC6	Q9NR09	BIRC6	Baculoviral IAP repeat-containing protein 6	0	NaN	No	0	NaN	No	NaN	0	No	NaN	NaN	NaN	NaN	NaN	NaN	5.57229	5.21408	6.0021	5.69409	NaN	NaN	NaN	6.94823	NaN	6.99807	NaN	NaN	NaN	NaN	7.02661	NaN	NaN	NaN	NaN	NaN	NaN	NaN	NaN	NaN	NaN	NaN	NaN	NaN
BLMH	Q13867	BLMH	Bleomycin hydrolase	0.534148	-0.990942	No	0.281751	0.567392	No	0.788557	1.00526	No	4.65493	5.64431	7.7512	8.78239	8.0966	8.39612	6.937	8.18125	7.45438	8.91539	8.1713	8.54194	5.75098	8.02273	6.39839	6.56731	5.90199	5.52725	7.80947	6.78198	7.88371	6.14391	7.5403	9.1269	6.92063	7.12493	8.21964	5.22132	7.15303	6.98726	5.40878	6.08993	5.63791	6.84522
BLVRA	P53004	BIEA	Biliverdin reductase A	0.452188	-0.159712	No	0.166814	-0.0372758	No	0	-0.000641823	No	9.45795	9.87712	9.53448	8.80181	9.39719	NaN	9.69062	9.60488	9.3057	9.64824	9.83889	9.11738	NaN	8.57902	9.03237	9.24302	NaN	NaN	9.84058	NaN	9.13772	9.21223	NaN	9.42222	NaN	8.48129	8.14879	NaN	9.19061	9.42286	NaN	NaN	NaN	NaN
BLVRB	P30043	BLVRB	Flavin reductase	1.52117	-0.724846	No	0.221495	-0.112381	No	0.685073	-0.293485	No	5.5432	NaN	6.42974	6.68971	6.26076	6.3595	7.01195	7.44017	6.86854	7.15459	5.73245	5.88508	6.19486	7.10342	6.11527	6.77939	5.58628	NaN	6.55337	6.72567	6.85931	6.76267	6.4167	6.39845	NaN	5.45167	5.90239	6.33004	6.71114	7.05225	NaN	NaN	6.33568	6.12245
BMERB1	Q96MC5	MERB1	bMERB domain-containing protein 1	0	-0.517155	No	0	NaN	No	0	NaN	No	NaN	NaN	7.97762	NaN	NaN	NaN	8.47325	8.49477	8.6675	NaN	NaN	NaN	NaN	NaN	NaN	8.43222	NaN	NaN	7.1813	NaN	7.7842	NaN	NaN	NaN	NaN	NaN	NaN	8.36477	NaN	NaN	6.89343	NaN	NaN	NaN
BPIFB1	Q8TDL5	BPIB1	BPI fold-containing family B member 1	0.676223	-1.24134	No	0.253593	0.779597	No	0.262857	0.415349	No	6.25097	5.52453	8.00512	10.5884	8.6331	9.28176	8.07807	8.57001	8.9468	10.3322	9.8428	10.7435	7.00715	9.8628	6.302	8.40153	6.16431	6.10395	8.69252	8.07234	9.12223	9.32685	9.12466	10.3271	7.64712	6.41344	9.52335	6.3794	8.36712	9.63774	6.47141	7.10201	6.97239	8.37229
BPNT1	O95861	BPNT1	3'(2'),5'-bisphosphate nucleotidase 1	0.291814	-0.288434	No	0.326828	0.0799217	No	0	0.474704	No	6.97214	5.66588	6.4032	NaN	6.59958	6.39894	6.95358	6.78403	6.31589	6.65799	NaN	NaN	6.00423	5.88898	NaN	6.62523	6.13993	6.319	6.10455	5.73667	6.151	6.43745	NaN	6.1488	NaN	NaN	5.86597	NaN	6.58264	5.67409	5.99853	NaN	NaN	NaN
BRK1	Q8WUW1	BRK1	Protein BRICK1	0	-0.47144	No	0	NaN	No	0.149287	0.322316	No	8.83117	8.44673	NaN	7.96268	NaN	NaN	8.91817	NaN	NaN	NaN	NaN	NaN	NaN	NaN	NaN	8.4425	NaN	NaN	8.26665	8.534	8.72257	NaN	NaN	NaN	NaN	NaN	8.74166	9.04342	NaN	8.52144	8.1964	NaN	9.07495	8.0655
BRSK1	Q8TDC3	BRSK1	Serine/threonine-protein kinase BRSK1	0.171281	0.112879	No	1.08982	-0.280838	No	1.83625	-0.507109	No	8.05571	8.45754	8.07157	8.0501	7.80865	6.9811	8.61066	7.96161	8.34119	7.98461	7.67923	7.47244	8.12889	8.13448	8.15517	8.31031	8.33889	7.83202	7.87877	8.64418	8.39493	8.47677	7.22475	7.7682	7.38173	7.61732	8.11169	8.01959	7.74968	7.99746	8.55214	8.02509	8.4989	8.34265
BSG	P35613	BASI	Basigin	1.34498	-0.33515	No	0.453952	-0.132986	No	0.720925	-0.249006	No	9.27237	9.7604	9.93849	8.9758	9.21421	9.60932	10.14	9.85076	9.59885	9.63811	9.12427	NaN	9.52873	9.28996	9.58534	9.35565	9.23696	9.17269	9.27215	9.69477	9.5834	9.7616	8.69566	8.54031	8.01404	8.74677	9.26643	8.96299	8.84432	9.10829	8.8646	8.76782	9.45292	8.68227
BSN	Q9UPA5	BSN	Protein bassoon	1.7744	-0.275923	No	1.65954	-0.274279	No	1.38122	-0.450707	No	9.18601	9.77491	9.665	9.47173	9.60689	9.67346	10.1085	9.7282	9.75583	9.81818	8.67349	8.35034	9.20683	9.43872	9.68659	9.67282	9.12321	8.82582	9.12201	9.77533	9.88776	9.94036	8.85468	8.69024	8.5324	8.89916	9.17607	9.22701	9.32835	9.21897	9.4809	8.96291	9.96507	9.12761
BTF3	P20290	BTF3	Transcription factor BTF3	0	NaN	No	0	NaN	No	0	NaN	No	6.04864	NaN	NaN	4.75148	4.40911	NaN	NaN	NaN	NaN	NaN	5.91426	NaN	NaN	5.39909	NaN	NaN	NaN	NaN	NaN	NaN	NaN	NaN	6.72371	NaN	NaN	6.72235	NaN	NaN	NaN	NaN	NaN	NaN	NaN	NaN
C11orf54	Q9H0W9	CK054	Ester hydrolase C11orf54	0.192829	0.135027	No	0	0.0129228	No	0	0.217381	No	NaN	6.16083	5.28265	5.45618	6.50109	6.54014	5.33389	5.72608	5.40831	6.39237	5.19279	NaN	NaN	5.77496	NaN	5.3536	NaN	NaN	NaN	NaN	NaN	5.34068	5.82824	6.07492	NaN	NaN	5.60327	NaN	5.61085	NaN	5.19258	NaN	NaN	NaN
C12orf57	Q99622	C10	Protein C10	0.0569171	0.0273283	No	0	0.228527	No	0.553963	-0.683116	No	7.09273	NaN	7.23067	NaN	7.46434	NaN	4.28711	7.34322	7.11139	7.29714	NaN	NaN	7.1342	NaN	NaN	7.14778	6.7291	NaN	NaN	NaN	6.77001	6.91925	NaN	NaN	6.65978	NaN	5.36439	NaN	6.84598	6.81285	7.0224	NaN	6.36801	NaN
C1orf198	Q9H425	CA198	Uncharacterized protein C1orf198	0	0.669576	No	0	-0.685874	No	0	-0.366712	No	NaN	NaN	NaN	NaN	5.35937	NaN	4.90314	5.58507	5.44323	4.68979	NaN	NaN	5.0179	NaN	NaN	5.18785	NaN	NaN	NaN	NaN	NaN	5.87373	NaN	5.29753	NaN	NaN	NaN	NaN	4.96082	5.66424	NaN	NaN	NaN	NaN
C1QB	P02746	C1QB	Complement C1q subcomponent subunit B	0.963703	1.47631	No	0	2.11176	No	0.43275	-1.03329	No	9.48168	NaN	7.1172	8.50005	8.28961	6.96784	6.98834	NaN	7.73959	7.13498	NaN	NaN	8.15178	NaN	9.45747	NaN	NaN	NaN	NaN	9.51842	7.34571	8.79517	NaN	6.94865	7.54813	NaN	NaN	8.2738	8.65317	8.6588	NaN	8.44064	8.3807	8.63022
C1QBP	Q07021	C1QBP	Complement component 1 Q subcomponent-binding protein, mitochondrial	0.913578	-0.370869	No	0.632979	0.327385	No	0.960289	0.725739	No	7.31891	5.48715	6.58002	5.55092	5.4551	7.68527	6.59103	6.66355	5.67581	5.63078	6.91165	6.31505	NaN	6.63387	6.50627	5.92564	6.85381	NaN	5.07882	5.94317	5.79582	6.07509	7.44092	6.90452	NaN	6.86212	6.18241	5.73433	7.06391	5.56419	4.76943	5.67356	NaN	5.73727
C1QC	P02747	C1QC	Complement C1q subcomponent subunit C	0.0454705	0.0366157	No	0.466766	-0.344769	No	0.618532	-0.536069	No	6.78755	NaN	7.55574	6.59456	6.35616	6.15535	6.92698	7.41333	6.54752	7.03134	6.6024	NaN	6.02112	8.13302	7.05767	6.72354	5.83851	NaN	6.61885	8.19434	7.87126	7.73864	7.10319	6.52717	NaN	NaN	7.34915	6.81495	NaN	7.69341	NaN	NaN	7.43316	7.17291
C2CD2L	O14523	C2C2L	Phospholipid transfer protein C2CD2L	1.36169	-0.396536	No	0.726201	0.175264	No	0.79118	0.514374	No	6.51006	6.38961	6.72996	7.05787	6.39062	7.07532	7.06431	7.17374	6.9427	6.80474	6.47735	5.45631	6.60004	6.73812	6.96669	7.15493	6.71503	5.22532	6.20528	6.695	6.90217	6.59905	6.04182	6.33912	6.42974	5.34689	6.34623	6.32778	4.65245	5.80575	6.46599	NaN	5.42313	6.5655
C3	P01024	CO3	Complement C3	0.685024	-0.479764	No	0.305896	0.253359	No	0.810929	0.27502	No	8.15956	8.5126	9.39241	9.73399	9.57063	9.62396	9.38421	9.67047	9.3298	9.75959	9.48046	9.28701	9.0751	10.0195	9.21243	8.89224	9.09989	7.55301	9.30607	9.65061	9.98157	8.85544	9.53329	9.59805	8.57202	8.76056	9.59597	9.13955	8.75606	9.51883	7.94409	8.58915	9.26162	9.47957
C4A	P0C0L4	CO4A	Complement C4-A	1.41021	-0.403746	No	0.243799	0.146025	No	0.421915	-0.161227	No	5.99168	5.78185	6.51706	6.99243	6.34213	6.62389	6.55934	6.86726	7.04941	6.54399	6.48213	6.74731	6.19872	6.47683	5.74453	5.75135	6.05451	6.27658	6.40451	5.49114	6.39532	5.90266	6.578	6.99308	5.34996	6.2894	6.61912	7.55647	6.72253	7.18551	6.27449	6.27846	6.61744	7.27496
CA2	P00918	CAH2	Carbonic anhydrase 2	0.0130354	0.00420284	No	0.213264	-0.0409365	No	0.537179	-0.253132	No	8.41407	9.13185	9.70161	8.91819	8.91611	8.61264	9.28084	9.54233	8.57031	9.0547	8.30162	8.50079	8.7796	8.56464	8.49245	8.84057	8.56609	8.59655	8.75082	8.27826	8.59458	8.939	9.24547	8.71516	8.27961	6.95579	8.75462	8.62353	8.86523	9.30283	8.95368	7.84163	8.63047	8.49914
CA6	P23280-2	CAH6	Carbonic anhydrase 6	0.0752743	-0.0966072	No	0	NaN	No	0.293319	1.11983	No	6.29063	NaN	4.21899	NaN	5.571	6.84364	6.24107	4.70593	5.97528	4.82087	5.72552	6.47017	NaN	NaN	NaN	NaN	NaN	NaN	10.3756	4.82659	7.65902	6.00166	6.62637	8.10171	NaN	NaN	7.14271	NaN	6.65833	5.83009	NaN	NaN	NaN	6.29289
CACNA1B	Q00975	CAC1B	Voltage-dependent N-type calcium channel subunit alpha-1B	0.168678	-0.0620061	No	0.225347	-0.0763149	No	0.571117	-0.66441	No	NaN	5.97703	5.69227	5.91377	5.81492	6.08275	6.19988	6.03524	5.66104	5.74984	5.78424	NaN	5.96503	5.96307	6.44362	5.97115	5.96433	6.04748	5.96155	6.0019	6.11933	6.46157	5.82498	5.08938	NaN	NaN	5.69363	5.9094	NaN	5.84457	6.8709	5.2129	7.06697	5.7741
CACNA1E	Q15878	CAC1E	Voltage-dependent R-type calcium channel subunit alpha-1E	0.644282	-0.463629	No	0.636168	-0.52605	No	0.89951	-0.244769	No	6.68922	6.1102	6.51315	6.46995	7.21067	6.01693	6.8042	7.67765	7.39414	7.41842	6.21797	NaN	6.99269	6.79831	7.46089	6.96619	7.61976	NaN	NaN	6.92936	7.27659	7.72184	6.38245	NaN	NaN	NaN	7.16122	6.53115	6.55807	7.53413	6.10023	NaN	7.28498	6.96607
CACNA2D1	P54289-2	CA2D1	Voltage-dependent calcium channel subunit alpha-2/delta-1	1.52866	-0.356039	No	1.85625	-0.326544	No	1.1695	-0.3603	No	9.1441	10.0016	9.97623	9.43777	9.58147	9.72611	10.4666	10.0099	9.9667	9.75199	8.65632	8.5753	9.15772	9.56324	9.80901	9.45647	9.22564	9.18018	9.39589	9.78132	9.86284	9.73146	8.84216	8.42567	8.53717	8.16863	9.45981	8.9173	9.18922	8.45366	9.33052	8.9531	9.8008	8.78524
CACNA2D3	Q8IZS8	CA2D3	Voltage-dependent calcium channel subunit alpha-2/delta-3	0.0338805	-0.0659329	No	1.62535	0.266323	No	0	0.676359	No	7.04254	NaN	4.5235	7.27989	6.54701	6.44129	6.28167	6.52036	6.78387	5.91115	NaN	NaN	NaN	6.27615	6.96456	6.49983	NaN	NaN	NaN	5.94618	6.68328	6.31211	7.30003	6.89444	NaN	NaN	NaN	NaN	6.62367	NaN	NaN	NaN	NaN	NaN
CACNB2	Q08289	CACB2	Voltage-dependent L-type calcium channel subunit beta-2	1.24425	0.66739	No	0.59549	-0.144251	No	0	NaN	No	7.90373	NaN	7.17707	5.43748	5.36683	6.71952	7.19106	6.50017	4.73137	5.26448	7.07297	NaN	6.13594	5.72973	5.9162	6.38533	7.02566	NaN	NaN	6.15476	6.07244	6.42838	NaN	NaN	NaN	NaN	6.06915	NaN	NaN	5.59616	NaN	6.61572	NaN	NaN
CACNB4	O00305	CACB4	Voltage-dependent L-type calcium channel subunit beta-4	0	-0.643597	No	0.0364276	-0.0238628	No	NaN	0	No	NaN	NaN	5.2618	5.33532	6.23818	NaN	NaN	NaN	5.97892	NaN	NaN	NaN	5.46328	5.96188	NaN	5.57134	NaN	NaN	5.61169	5.57783	6.38234	5.87857	NaN	NaN	NaN	NaN	NaN	NaN	NaN	NaN	NaN	NaN	NaN	NaN
CACNG3	O60359	CCG3	Voltage-dependent calcium channel gamma-3 subunit	0	-0.494397	No	0	0.12198	No	NaN	0	No	NaN	NaN	NaN	4.15254	NaN	NaN	4.77534	4.34837	4.64694	4.17594	NaN	NaN	NaN	NaN	NaN	5.17375	NaN	NaN	NaN	4.69989	NaN	5.05177	NaN	NaN	NaN	NaN	NaN	NaN	NaN	NaN	NaN	NaN	NaN	NaN
CACNG8	Q8WXS5	CCG8	Voltage-dependent calcium channel gamma-8 subunit	1.08526	-0.42394	No	0.53331	-0.252294	No	1.03385	-0.177366	No	5.58212	6.29352	6.70322	7.08041	5.90889	6.29438	6.30698	6.88243	7.30327	6.9008	6.0473	NaN	6.62741	7.39605	6.08714	6.99586	6.68455	5.51957	6.5305	7.92762	5.69627	7.57629	5.1855	6.26152	6.97248	NaN	5.72574	NaN	5.19551	6.55412	7.07403	NaN	6.03105	NaN
CACYBP	Q9HB71	CYBP	Calcyclin-binding protein	0.728293	-0.559982	No	0.613805	-0.380888	No	0.595702	0.489251	No	6.80423	5.81316	7.48403	7.3815	6.80018	6.45933	7.6304	7.95521	7.67319	7.36489	6.19005	6.28851	6.52099	6.63684	6.373	7.28106	7.03926	NaN	6.97879	6.94299	7.29662	6.64871	6.48118	6.60851	NaN	NaN	5.73156	NaN	5.59923	5.90339	6.02088	6.01412	5.85088	NaN
CAD	P27708	PYR1	CAD protein	0	NaN	No	0	NaN	No	0	NaN	No	6.12607	NaN	NaN	NaN	NaN	NaN	NaN	3.50817	NaN	NaN	5.44796	NaN	NaN	NaN	NaN	NaN	NaN	NaN	NaN	NaN	NaN	NaN	6.72201	NaN	NaN	NaN	NaN	NaN	NaN	NaN	NaN	NaN	NaN	NaN
CADM1	Q9BY67-5	CADM1	Cell adhesion molecule 1	0.946239	-1.1378	No	0.3422	-0.581174	No	0	-0.317634	No	5.91932	3.92997	5.59517	5.39479	5.65858	NaN	6.3995	6.09172	6.79262	5.84587	4.29682	NaN	6.01941	NaN	3.88059	5.10411	NaN	NaN	5.71071	NaN	5.68374	5.35318	4.74641	NaN	NaN	NaN	NaN	NaN	5.06404	NaN	NaN	NaN	NaN	NaN
CADM2	Q8N3J6	CADM2	Cell adhesion molecule 2	1.89909	-0.470105	No	0.824167	-0.152969	No	0.660245	-0.220746	No	8.3837	8.81804	8.96896	8.41109	8.61658	8.91877	9.44884	9.29413	9.14448	8.74267	8.16178	7.64632	8.48668	8.62348	8.49685	8.67898	8.6088	7.69777	8.72749	8.74009	8.29612	8.94164	7.89279	7.99115	7.71183	7.89073	7.85191	7.56121	8.28555	8.00793	8.48076	8.16359	8.10732	7.17894
CADM3	Q8N126	CADM3	Cell adhesion molecule 3	0.552896	-0.301722	No	1.1307	-0.288736	No	1.94411	-0.737925	No	6.9387	7.74831	7.98906	7.58138	7.9529	6.36942	8.46317	8.30256	8.37004	8.21377	6.79153	6.74059	7.28411	7.47617	7.6705	7.47294	7.23531	7.11858	7.64262	7.97797	7.32718	7.8666	7.40557	6.76339	6.43986	5.75142	6.99609	6.88322	7.49132	7.40081	7.39697	6.91148	8.23938	7.22714
CADM4	Q8NFZ8	CADM4	Cell adhesion molecule 4	0.790547	-0.196699	No	1.18701	-0.180088	No	0.35529	-0.167138	No	7.50622	7.61889	7.62155	7.55666	8.05924	7.75937	7.85559	8.11546	7.77248	7.84315	7.64935	6.58762	7.01201	7.48238	7.51529	7.46666	7.74957	6.62671	7.30252	7.93178	7.45537	7.72788	6.96452	7.40816	7.05133	7.46001	7.41688	7.43334	6.8238	8.02974	7.54962	7.04701	8.10768	7.17922
CADPS	Q9ULU8	CAPS1	Calcium-dependent secretion activator 1	1.27925	-0.490836	No	0.399832	-0.123444	No	1.0553	-0.476224	No	7.04183	6.73833	7.38908	7.1468	7.35626	6.94925	7.74236	7.99154	7.74057	7.70275	6.5093	5.95295	7.32863	7.32256	6.83212	7.38577	6.72388	6.19034	6.9448	7.33232	7.44489	7.43578	6.77538	6.57928	5.26459	6.46678	6.74602	6.04621	7.31192	6.79384	6.73475	6.39469	6.8449	6.6555
CADPS2	Q86UW7	CAPS2	Calcium-dependent secretion activator 2	0.193439	0.372303	No	0	0.0219584	No	NaN	0	No	7.16086	NaN	6.52365	6.55161	6.87043	7.37636	NaN	5.56355	NaN	NaN	NaN	NaN	NaN	NaN	NaN	7.71212	6.94771	NaN	NaN	NaN	7.20552	7.69016	NaN	NaN	NaN	NaN	NaN	NaN	NaN	NaN	NaN	NaN	NaN	NaN
CALB2	P22676	CALB2	Calretinin	0.463376	-0.481634	No	0.11578	0.0397244	No	0.328317	-0.154818	No	6.80474	5.13966	7.67409	7.01897	6.99301	6.92295	7.40656	7.51429	7.08567	7.10917	7.64223	6.54974	6.4348	6.31083	6.68057	7.19738	7.26674	6.10479	6.61531	6.24674	6.86537	7.47825	6.77225	6.36325	5.53673	6.14988	5.92712	5.41838	6.54619	6.49245	6.40943	NaN	6.07318	5.27057
CALCOCO1	Q9P1Z2	CACO1	Calcium-binding and coiled-coil domain-containing protein 1	1.35998	-0.608758	No	1.06147	-0.232179	No	0.041853	0.0150228	No	7.13235	6.54741	7.35613	6.84825	7.40018	7.51317	7.88731	7.5242	7.64049	7.76294	6.65475	5.968	7.30925	7.14614	7.48297	7.39647	7.31158	6.00781	7.30295	7.52028	7.48279	7.72525	7.14264	6.44638	6.18996	6.67567	6.97807	6.79023	7.23625	6.34632	6.72435	6.33459	6.87081	6.62049
CALM1	P0DP23	CALM1	Calmodulin-1	0.312104	-0.095122	No	0.814054	-0.151874	No	0.47152	-0.140373	No	12.0818	12.2703	12.6497	12.5096	12.3742	12.4475	12.586	12.3372	12.4669	12.5237	12.0191	11.4945	12.4034	12.2174	12.2072	12.6482	12.1892	11.7296	12.1654	12.449	12.6326	12.7352	12.1034	11.9015	11.9739	11.4725	11.9711	12.441	12.1181	12.4441	12.4287	11.4796	12.1348	12.1003
CALML3	P27482	CALL3	Calmodulin-like protein 3	0.272069	-0.419597	No	0.109382	-0.199988	No	0.290412	0.35834	No	10.1818	10.795	11.1976	11.9442	10.8874	11.5261	10.7351	10.9766	10.7113	13.1549	11.0439	11.7369	10.3005	11.0085	10.0233	10.3027	10.0696	9.73676	12.676	10.8104	11.7578	10.5652	10.8011	12.1981	10.6127	9.7347	11.6976	9.74842	10.8013	10.8538	9.68199	9.9227	9.96098	11.4218
CALML5	Q9NZT1	CALL5	Calmodulin-like protein 5	0.422639	-0.864082	No	0.15139	0.274073	No	0.421482	0.68735	No	8.88191	10.3441	11.1568	12.1354	11.0777	12.251	10.8424	11.0158	10.5416	13.2654	11.8182	12.6181	10.4912	11.1743	10.5301	10.1713	9.99738	9.70704	11.5322	11.7014	11.6294	10.5915	11.8324	12.5574	11.8753	11.691	12.4846	9.66718	11.8295	11.2603	8.97611	11.2662	10.777	11.8746
CALR	P27797	CALR	Calreticulin	1.22023	0.771411	No	1.12193	1.41166	No	0.619746	1.60743	No	7.27748	5.54389	3.85217	5.16725	5.18183	6.34105	3.84651	3.07785	5.31788	4.58227	6.12336	4.2754	NaN	6.14139	5.43438	4.96781	4.90236	NaN	6.43225	3.94081	4.62097	NaN	6.30852	NaN	NaN	7.22628	5.16603	NaN	5.33758	NaN	NaN	4.98235	NaN	NaN
CALU	O43852	CALU	Calumenin	0.505015	0.491171	No	0.0953193	0.385532	No	0	NaN	No	6.60834	5.59535	5.29338	6.39786	5.56843	6.38431	5.56259	NaN	5.18115	NaN	7.6182	NaN	7.09371	5.50593	6.57997	NaN	NaN	NaN	NaN	6.32583	4.989	6.19443	6.01167	NaN	7.6092	6.75421	NaN	NaN	NaN	NaN	NaN	NaN	NaN	NaN
CAMK1D	Q8IU85	KCC1D	Calcium/calmodulin-dependent protein kinase type 1D	2.56623	-0.935413	No	0.0881946	-0.044632	No	0.396594	-0.430695	No	5.77766	6.2908	6.88758	6.57915	6.34504	7.24661	7.2445	7.56185	7.41951	7.08483	6.36357	5.59025	6.49781	6.9815	6.12069	6.57975	6.03175	NaN	6.42977	6.70686	6.74803	6.85008	5.80815	6.13843	4.4021	4.47246	6.65607	5.37903	6.5012	5.88606	6.34041	NaN	5.90477	5.90482
CAMK2A	Q9UQM7	KCC2A	Calcium/calmodulin-dependent protein kinase type II subunit alpha	1.61515	-0.539257	No	1.48921	-0.316249	No	0.498771	-0.126294	No	13.827	13.4549	14.3578	13.4409	14.1453	14.265	14.4734	14.5425	14.1935	14.4479	13.3751	12.567	13.3349	13.5482	13.2726	13.6697	13.9916	12.8564	13.3928	13.6105	13.929	13.8847	13.6981	13.2725	12.5197	12.6457	12.7284	12.8928	13.8076	13.1472	13.1896	12.7241	12.7544	12.892
CAMK2B	Q13554-2	KCC2B	Calcium/calmodulin-dependent protein kinase type II subunit beta	2.15524	-0.638125	No	0.996698	-0.254315	No	0.562674	-0.185335	No	10.2317	9.8601	10.4164	9.72375	10.5232	10.709	10.8232	10.9124	10.635	10.8662	9.66896	8.74175	9.94442	9.96999	9.73807	10.1989	10.303	9.20641	9.76057	10.0688	10.1892	10.26	9.88155	9.93468	8.86008	8.91999	9.46426	9.62219	10.1764	9.92661	9.74775	8.94788	9.484	9.51209
CAMK2D	Q13557	KCC2D	Calcium/calmodulin-dependent protein kinase type II subunit delta	1.90974	-0.621096	No	1.73629	-0.287217	No	0.306126	-0.127849	No	10.3177	10.0758	10.7086	10.2388	10.655	10.9315	11.1882	11.2009	10.8939	10.8868	9.51856	9.24892	9.9705	10.1868	9.93224	10.4004	10.0701	9.48394	10.0587	10.2608	10.4439	10.6633	10.5411	9.77409	8.77549	8.89078	9.26556	9.66114	10.3704	9.83204	9.62551	8.6701	9.67843	9.49872
CAMK2G	Q13555-11	KCC2G	Calcium/calmodulin-dependent protein kinase type II subunit gamma	0.337303	-0.135222	No	0.332625	-0.187185	No	0.813472	-0.425876	No	6.634	6.28782	5.99472	6.77744	7.04631	6.48523	6.5013	6.74156	6.65956	7.02875	6.88554	NaN	5.25557	6.89111	6.48858	6.77259	6.72667	NaN	6.34404	7.05784	6.42517	6.6756	6.61669	6.88199	NaN	NaN	6.27255	5.67514	6.87577	7.14972	6.04182	NaN	6.36223	6.76215
CAMK4	Q16566	KCC4	Calcium/calmodulin-dependent protein kinase type IV	0.917961	-0.107678	No	0.275826	-0.167133	No	0.320875	-0.33076	No	6.22449	7.0093	7.09069	6.47368	6.82785	6.40572	6.91121	7.17833	6.66951	6.99961	5.99793	NaN	6.538	7.22152	5.84761	6.98715	6.6502	6.50859	6.16817	6.90324	6.65772	7.04855	5.79339	6.07839	4.50355	6.79975	6.69776	6.84245	5.81635	6.37737	6.8092	6.04858	7.11105	6.5373
CAMKK1	Q8N5S9	KKCC1	Calcium/calmodulin-dependent protein kinase kinase 1	0.159619	0.215792	No	0.971856	-0.272227	No	0.355919	-0.159742	No	7.29719	7.56523	7.32556	6.95653	7.09318	5.07383	7.98595	7.3942	7.42515	7.27961	6.43041	7.22765	6.9265	7.39862	7.57622	7.60991	7.21902	7.2531	6.80301	7.91356	7.67541	7.93856	6.88729	6.94915	NaN	6.76492	7.50329	7.26005	6.79301	7.0396	6.76036	7.33125	8.10081	6.89874
CAMKV	Q8NCB2	CAMKV	CaM kinase-like vesicle-associated protein	0.994194	-0.179596	No	0.886901	-0.182364	No	1.69033	-0.34625	No	8.41788	9.04507	9.1111	8.42926	8.83046	8.70095	9.29208	8.98482	8.78952	8.96438	8.34932	7.50864	8.08087	8.93982	9.07148	8.82723	8.56527	8.07472	8.25268	9.05544	8.86803	9.05542	7.93863	7.78797	8.17466	7.9354	8.4577	8.29631	8.25569	8.3222	8.69125	8.34136	8.90679	8.15086
CAMSAP1	Q5T5Y3	CAMP1	Calmodulin-regulated spectrin-associated protein 1	0	-0.149408	No	0.487933	0.525832	No	0	NaN	No	6.43376	NaN	NaN	NaN	6.41936	NaN	5.95781	6.12186	6.79968	6.56877	NaN	NaN	7.04029	4.65659	NaN	6.93709	NaN	NaN	6.21983	NaN	7.07415	6.70588	6.36391	6.6147	NaN	NaN	NaN	NaN	NaN	NaN	NaN	NaN	NaN	NaN
CAMSAP2	Q08AD1	CAMP2	Calmodulin-regulated spectrin-associated protein 2	0.221802	0.811686	No	0.228734	-0.209122	No	0	-1.26046	No	7.47151	5.26343	6.87395	NaN	5.68131	2.53889	5.69201	7.00797	7.31042	6.80458	NaN	NaN	5.77291	7.75403	5.90546	6.80431	6.02688	NaN	NaN	7.37244	6.66294	7.05579	5.96519	NaN	NaN	NaN	5.63201	6.47003	NaN	7.06426	6.04767	NaN	6.89247	NaN
CAMSAP3	Q9P1Y5	CAMP3	Calmodulin-regulated spectrin-associated protein 3	0.34332	-0.196409	No	0.41978	-0.170586	No	1.06492	-0.547615	No	7.25028	7.51819	6.97099	6.99736	7.06179	6.58244	7.82646	7.58764	7.61567	7.16845	6.75708	6.70514	6.76056	7.46136	7.1964	7.53416	7.50768	6.54562	7.3346	7.59453	7.328	7.12779	6.5722	6.30448	5.57408	5.86706	7.03155	7.09816	6.52366	7.02064	6.75254	7.17401	7.37754	6.88484
CAND1	Q86VP6	CAND1	Cullin-associated NEDD8-dissociated protein 1	2.35439	-0.557726	No	0.957895	-0.14348	No	0.457013	-0.188362	No	7.7533	8.01432	8.5033	7.8803	8.04476	8.35252	8.75818	8.80909	8.65686	8.40797	7.60941	7.51951	7.94404	8.04088	8.04896	8.13042	8.04976	7.62268	8.07097	7.99335	8.03282	8.38452	7.78088	7.75435	7.21016	7.4141	7.12156	7.74518	8.00213	7.72334	8.08185	7.18998	7.66043	7.49867
CANX	P27824	CALX	Calnexin	0.231394	0.109384	No	0.748404	0.34625	No	1.73826	0.661584	Yes	9.57242	7.81496	8.6087	8.50172	8.644	9.16233	8.42481	8.31059	8.18287	8.51428	9.30436	7.9528	7.63747	8.66879	8.16392	8.45324	8.28548	7.49925	8.09134	7.83929	7.93817	8.44954	9.07118	8.37838	7.36022	9.20512	7.95985	7.97105	8.07383	7.83305	7.22553	7.78975	7.64904	7.40511
CAP1	Q01518	CAP1	Adenylyl cyclase-associated protein 1	0.542417	-0.17326	No	0.0144762	0.00897106	No	0.697484	-0.143948	No	8.32481	8.57829	9.28064	8.84552	9.01682	8.3857	9.05985	9.1726	8.73915	9.55506	8.62653	8.95029	8.72497	9.19522	8.27285	9.09774	8.07597	8.61772	9.23014	8.94527	9.00611	8.93857	8.8832	8.83587	8.39423	8.15066	8.93538	8.73855	9.06307	9.13058	8.84352	8.36094	8.73352	8.66995
CAP2	P40123	CAP2	Adenylyl cyclase-associated protein 2	1.63707	-0.399028	No	0.778598	-0.226972	No	1.60653	-0.357863	No	9.33269	9.30379	9.66621	9.34337	9.66656	9.76391	9.98469	9.9785	9.88751	9.69316	8.95301	8.09147	9.30311	9.42791	9.71104	9.64014	9.32696	8.63533	9.0372	10.0317	9.6578	9.79951	9.30004	8.79598	8.82688	8.11483	9.31704	9.21288	9.5391	9.34225	9.61078	8.14513	9.71166	9.36591
CAPG	P40121	CAPG	Macrophage-capping protein	0.36525	-0.276067	No	0.0866021	-0.096298	No	0.937647	0.186644	No	7.72096	8.01672	9.1739	8.67415	7.9659	8.64842	8.26319	8.60874	8.4131	8.99852	7.99239	7.93593	7.40464	8.51597	7.88625	8.35216	7.48992	7.05066	9.2685	8.13151	8.32196	8.40257	8.82266	9.10543	7.35754	7.03884	8.37446	8.64742	8.64333	9.00544	7.5167	6.90866	8.0723	8.08005
CAPN1	P07384	CAN1	Calpain-1 catalytic subunit	0.351427	-0.245089	No	0.283894	-0.210135	No	0.463195	0.200044	No	8.25781	8.83881	8.79335	8.84274	8.47496	9.34562	9.07043	9.08498	8.11015	8.82195	9.02334	8.09696	8.1615	8.78691	8.08204	8.51419	8.14969	8.31399	9.52997	8.58712	8.58516	8.75982	8.75108	9.07053	8.78593	9.21352	9.17557	9.08567	8.96568	9.04636	8.59647	8.27167	8.63494	9.36693
CAPN5	O15484	CAN5	Calpain-5	0	NaN	No	0	NaN	No	NaN	0	No	NaN	NaN	4.71116	NaN	NaN	NaN	4.88882	NaN	NaN	4.34463	NaN	NaN	NaN	NaN	NaN	NaN	NaN	NaN	NaN	NaN	3.9394	NaN	NaN	NaN	NaN	NaN	NaN	NaN	NaN	NaN	NaN	NaN	NaN	NaN
CAPRIN1	Q14444	CAPR1	Caprin-1	0.344808	-0.198064	No	0.185733	0.148378	No	0	-0.0672936	No	NaN	NaN	7.0319	6.60636	7.52846	NaN	6.7248	7.6326	6.72783	7.40048	8.12725	NaN	7.11264	NaN	6.85199	7.44628	NaN	NaN	NaN	NaN	6.94749	7.05402	7.04714	NaN	NaN	NaN	7.72413	6.73657	7.11443	6.71455	NaN	NaN	NaN	NaN
CAPS	Q13938	CAYP1	Calcyphosin	0.999043	-0.209875	No	1.13886	-0.318501	No	0.667125	-0.45348	No	9.1017	7.55642	8.09555	8.03009	6.8399	9.674	7.79526	8.25686	8.08951	6.8574	8.09907	7.03061	7.86285	6.51748	7.01292	8.33901	8.62185	7.53573	7.69417	7.29604	7.14736	8.47781	9.443	8.09598	7.43414	7.88859	7.51797	9.6317	9.72345	9.5796	8.62267	7.53757	8.06577	9.20319
CAPZA1	P52907	CAZA1	F-actin-capping protein subunit alpha-1	0.11782	-0.087962	No	0.196589	0.0977087	No	0.420606	-0.205568	No	9.29386	9.82134	9.02526	9.12805	8.51637	9.27954	9.2311	9.06604	9.0546	9.59342	9.1331	8.90128	9.08695	9.05365	9.81844	9.03628	8.73775	9.28166	9.18396	9.21229	8.90046	9.12734	9.03729	8.94222	8.47958	8.66806	8.89882	8.63255	8.93578	8.71551	9.63292	9.14225	8.84439	8.62108
CAPZA2	P47755	CAZA2	F-actin-capping protein subunit alpha-2	0.629823	-0.13077	No	1.12165	-0.178885	No	0.443973	-0.167961	No	10.276	10.5734	10.6278	10.5961	10.0951	10.2215	10.9288	10.507	10.7863	10.3786	10.2163	9.60098	10.2983	9.96174	10.0986	10.2727	10.2104	9.86869	10.2091	10.4079	10.3572	10.4685	9.98377	9.96228	9.34102	9.48854	9.9007	9.87518	10.1573	9.84086	10.3014	9.53411	10.0018	9.72383
CAPZB	P47756	CAPZB	F-actin-capping protein subunit beta	0.835401	-0.12068	No	1.76926	-0.236458	No	0.788473	-0.201455	No	9.05493	9.1356	9.0712	8.94225	8.82965	9.37004	9.26934	8.97688	9.01386	9.00691	8.93208	8.4492	8.90663	8.70734	8.87228	8.74093	8.99296	8.70732	9.1378	9.19796	8.92833	9.06283	8.39395	8.61146	8.33266	8.49689	8.54505	8.58797	8.72848	8.62111	9.05178	8.37749	8.77721	8.62064
CARHSP1	Q9Y2V2	CHSP1	Calcium-regulated heat-stable protein 1	0.115619	-0.48513	No	0.324405	-0.227278	No	0	NaN	No	NaN	2.64413	3.347	NaN	6.58659	6.2067	5.09051	4.6471	6.24784	4.2955	6.04159	NaN	NaN	5.97302	NaN	5.62897	NaN	NaN	6.31512	5.99099	6.5912	6.06555	NaN	5.30312	NaN	NaN	NaN	NaN	4.29172	NaN	NaN	NaN	6.67878	5.54651
CARMIL2	Q6F5E8	CARL2	Capping protein, Arp2/3 and myosin-I linker protein 2	0.484826	-0.128987	No	0.911693	-0.240419	No	1.48643	-0.499964	No	10.0422	10.4133	10.1696	10.2885	10.2799	10.4407	10.6376	9.91333	10.5647	10.2822	10.1874	9.73613	10.4442	10.4303	10.322	10.3045	10.3182	10.428	10.2221	10.9171	10.5485	10.4331	9.36999	9.16284	9.56	9.60385	10.0646	9.75608	10.122	9.83515	10.4051	10.0476	10.6571	9.45025
CARS1	P49589	SYCC	Cysteine--tRNA ligase, cytoplasmic	0.00189893	0.00177412	No	0.00548191	0.00309173	No	0.0844559	-0.113024	No	6.49415	6.65531	6.10596	6.18289	6.07237	5.93127	5.76041	6.6952	6.72634	6.38859	6.28059	5.68733	5.79899	6.42446	6.73075	6.06937	6.45998	5.55596	5.9056	6.50735	5.91348	6.63056	6.56832	5.01886	NaN	4.21485	5.46966	NaN	6.28471	NaN	NaN	NaN	5.97931	NaN
CASKIN1	Q8WXD9	CSKI1	Caskin-1	1.00895	-0.162632	No	1.32054	-0.259892	No	1.07657	-0.317942	No	7.68676	8.38815	8.24386	7.73154	8.0784	7.81792	8.74534	8.20049	8.04254	8.13557	8.11128	7.3735	7.82373	8.22817	8.01616	8.47138	8.44854	7.98326	7.74454	8.64452	8.16419	8.59852	7.37312	7.43515	7.45314	7.73759	7.74905	7.58875	7.34473	7.85467	8.35153	7.96525	8.21656	7.51171
CASP14	P31944	CASPE	Caspase-14	0.499445	-1.0032	No	0.434488	0.771419	No	0.568731	0.984156	No	7.62086	7.82898	10.2497	11.3943	11.2063	11.5753	9.44109	10.5624	10.0355	11.7019	11.1752	11.6823	9.32601	10.145	9.60094	9.02448	8.50066	8.21959	10.5877	9.6485	10.4894	8.87951	10.2342	11.3601	10.856	10.4821	10.7033	7.85399	10.0925	9.60837	7.78415	8.90161	8.84716	10.3511
CAST	P20810	ICAL	Calpastatin	0.136836	0.0998064	No	0.436213	-0.634089	No	1.30562	0.869064	Yes	NaN	6.32313	5.9936	6.22477	5.7489	6.3028	5.78398	5.79288	5.90428	6.41004	6.56228	6.79667	5.71354	5.66676	5.12061	5.10415	NaN	NaN	7.52428	5.43834	6.62289	4.5559	5.95456	6.58773	5.72632	5.0173	5.70884	6.03964	5.24159	4.91184	NaN	NaN	5.17273	5.48835
CAT	P04040	CATA	Catalase	0.549403	-0.794332	No	0.452627	0.693424	No	0.908334	0.937694	No	6.75204	7.23896	8.84497	9.71407	9.45016	9.64243	8.49928	9.18141	8.69725	9.9515	9.06371	9.67875	7.99283	9.21022	7.57721	8.14109	6.92335	6.85565	8.42094	8.22228	9.25737	7.82369	9.08317	10.3312	8.36717	8.72906	9.90571	7.60232	8.94573	9.04831	6.88196	7.1617	7.59876	8.75604
CBARP	Q8N350	CBARP	Voltage-dependent calcium channel beta subunit-associated regulatory protein	0	NaN	No	0	-0.509201	No	NaN	0	No	NaN	NaN	NaN	NaN	NaN	NaN	7.30034	6.35775	NaN	NaN	NaN	NaN	NaN	5.76823	NaN	6.2501	NaN	NaN	NaN	NaN	6.19099	6.7593	NaN	NaN	NaN	NaN	NaN	NaN	NaN	NaN	NaN	NaN	NaN	NaN
CBR1	P16152	CBR1	Carbonyl reductase	1.82501	-0.424177	No	1.69285	-0.225221	No	0.324467	-0.0914572	No	9.72673	9.87316	10.4205	9.97483	10.3729	10.0972	10.6321	10.8042	10.4651	10.4904	9.7925	8.97936	9.54171	10.3603	9.54982	10.3801	10.156	9.13632	10.0081	10.3691	9.7606	10.5249	10.0439	10.0403	9.60994	9.686	9.57038	9.45529	10.0513	10.3795	10.1278	9.76339	9.34065	9.29195
CBR3	O75828	CBR3	Carbonyl reductase	0.460711	-0.278722	No	0.383468	-0.479611	No	0.168887	-0.195209	No	6.10513	5.10897	5.90253	6.933	6.63654	6.07222	6.2796	6.44932	6.64454	6.6341	NaN	NaN	5.61677	6.7911	6.02821	6.27873	NaN	5.5295	7.51733	6.45193	6.52913	6.13485	6.41449	6.14152	NaN	5.49116	6.02076	5.12282	6.12644	6.84432	NaN	NaN	5.28607	6.22358
CBX1	P83916	CBX1	Chromobox protein homolog 1	0.64841	0.702701	No	0.739179	0.920369	No	0.505646	0.68339	No	7.33351	NaN	5.42185	5.2773	NaN	6.80495	6.12008	3.9474	5.1722	5.38368	7.49771	4.93006	5.93729	NaN	5.03172	4.60054	5.71607	NaN	NaN	6.82135	4.27101	4.38178	5.99231	5.7384	NaN	6.00004	5.11897	4.71095	NaN	4.1968	NaN	6.22289	4.38756	NaN
CC2D1A	Q6P1N0	C2D1A	Coiled-coil and C2 domain-containing protein 1A	0.011245	0.00325327	No	0.437981	-0.20053	No	0.44027	-0.417837	No	6.4917	6.55337	6.6901	6.46409	6.4841	6.7353	6.48954	6.35909	6.52401	6.55917	6.956	6.43067	5.81006	6.95551	6.7718	6.83066	6.92145	6.81088	6.89725	7.10645	6.71044	6.51141	6.012	5.99325	NaN	NaN	6.83903	6.61154	6.58042	6.94095	6.68699	5.76815	6.57642	NaN
CCAR2	Q8N163	CCAR2	Cell cycle and apoptosis regulator protein 2	3.74238	1.39133	Yes	1.82325	0.914041	Yes	0.991659	0.812831	No	6.70657	7.24021	7.28099	6.0635	6.69281	5.43232	5.71314	5.54592	4.87111	5.46495	6.99449	7.12914	6.51634	7.10932	5.86869	6.6102	6.00612	NaN	5.74951	5.46379	5.61684	5.69257	6.23303	6.61666	6.0121	5.83467	7.04771	6.31631	5.91746	5.32649	NaN	NaN	NaN	5.48355
CCDC124	Q96CT7	CC124	Coiled-coil domain-containing protein 124	1.79576	0.631735	Yes	1.72379	0.670131	Yes	1.51434	0.671647	Yes	7.60088	7.62838	7.36929	7.44958	6.8583	7.06133	7.11364	6.28701	6.59051	6.69526	7.30312	7.53979	7.62879	7.16791	7.37335	7.9143	6.78549	6.40195	6.37508	7.22128	6.9176	7.20507	6.86619	7.50071	7.31096	5.84089	7.47146	7.27547	NaN	7.00149	6.57535	NaN	7.14706	6.14812
CCDC177	Q9NQR7	CC177	Coiled-coil domain-containing protein 177	0.485899	-0.860504	No	0.287858	0.922734	No	0	NaN	No	5.58021	5.43596	4.31672	3.01393	5.14225	NaN	5.3227	4.87167	5.15375	NaN	4.75803	NaN	NaN	4.98022	NaN	5.55668	1.48134	NaN	4.95896	5.16083	5.22061	5.88456	4.26561	NaN	NaN	NaN	NaN	4.43918	NaN	NaN	NaN	NaN	NaN	NaN
CCDC6	Q16204	CCDC6	Coiled-coil domain-containing protein 6	0.987657	-0.131844	No	0.216735	-0.0739937	No	1.22368	-0.214576	No	7.6289	8.04572	8.11485	7.93562	7.87123	7.91915	8.30442	8.10747	8.05405	7.87043	7.52605	7.20445	7.53936	7.60503	8.07205	7.50954	7.68408	6.79347	7.59974	7.93131	7.89012	8.00173	7.76103	7.57113	6.85749	6.68721	7.66908	7.77112	7.93883	7.86781	7.29344	7.01447	7.90976	7.58022
CCDC92	Q53HC0	CCD92	Coiled-coil domain-containing protein 92	0.237125	-0.249993	No	0.916838	-0.438077	No	0.386031	-0.259464	No	6.03145	5.53961	5.81088	6.62164	6.0019	5.89572	7.23844	6.40443	5.96015	5.7567	NaN	6.09847	NaN	5.62407	6.13996	5.88454	5.47979	NaN	5.63883	6.28499	6.24855	6.42926	5.36427	6.03536	NaN	NaN	5.99926	6.08813	6.05348	5.85255	NaN	NaN	NaN	6.36013
CCNY	Q8ND76	CCNY	Cyclin-Y	1.79733	-0.561491	No	0.514995	-0.272447	No	0	-0.157894	No	5.88169	5.94727	5.5809	5.70667	6.15588	6.70406	6.56813	5.99144	6.55948	6.25676	NaN	5.15535	5.16755	5.89746	5.88213	5.85256	5.65602	NaN	5.66	6.65919	5.64682	5.92349	5.56806	NaN	NaN	NaN	NaN	NaN	5.72596	NaN	6.17893	NaN	5.32468	NaN
CCS	O14618	CCS	Copper chaperone for superoxide dismutase	0.485996	-0.217514	No	1.68912	-0.248448	No	0.122309	-0.0546026	No	6.5106	6.17614	6.69498	6.25111	6.17096	6.44904	7.15427	6.62995	6.33399	6.3241	6.32773	NaN	6.21406	5.73935	6.15586	6.71528	6.45848	5.35083	6.68009	5.98728	6.46194	6.80672	6.75619	6.47477	6.68929	5.86519	6.428	6.79995	6.71464	6.51975	7.16849	6.43886	5.99399	6.50527
CCT2	P78371	TCPB	T-complex protein 1 subunit beta	1.07639	-0.181069	No	0.533369	0.0554287	No	0.339304	0.101816	No	8.61949	8.68812	8.67618	8.45306	8.33582	8.88015	8.996	8.64678	8.80694	8.34814	8.77151	8.0141	8.50068	8.54784	8.35374	8.59651	8.65571	8.07645	8.25064	8.59357	8.33162	8.5438	8.44914	8.07845	8.00815	8.49501	8.24639	8.42138	8.30735	8.28656	8.34528	8.05453	8.02016	8.07375
CCT3	P49368	TCPG	T-complex protein 1 subunit gamma	1.50143	-0.268278	No	0.0825404	0.0220613	No	0.106214	0.0376728	No	9.87852	9.93828	10.0601	9.69617	9.7619	10.2656	10.3127	10.1391	10.14	9.81889	10.0583	9.20256	9.70997	9.99444	9.98246	10.0889	9.58371	9.291	9.8351	10.0076	9.93426	10.2525	9.85928	9.61944	9.26404	9.41644	9.83348	9.84118	9.88649	9.77126	9.71929	9.27752	9.50612	9.44713
CCT4	P50991	TCPD	T-complex protein 1 subunit delta	0.340693	-0.0689163	No	0.267025	0.0692075	No	0.117948	0.0441585	No	8.59656	8.60699	8.58302	7.99375	8.16889	8.71345	8.6761	8.35115	8.27643	8.27667	8.66789	7.82497	8.43086	8.23175	8.31443	8.4024	8.37132	8.20854	8.34243	8.27743	8.0074	8.24994	8.38356	7.95315	7.58775	8.22468	7.80634	8.25372	8.17315	7.94495	8.16806	7.86791	7.81191	7.97827
CCT5	P48643	TCPE	T-complex protein 1 subunit epsilon	0.470777	-0.117791	No	0.251786	0.0394437	No	0.0374475	-0.0161577	No	8.64695	8.73947	8.60507	8.07454	8.25977	9.02697	8.88057	8.45537	8.40001	8.15183	8.74679	8.27497	8.43933	8.23273	8.22393	8.39639	8.40791	8.26466	8.43639	8.34765	8.24734	8.37354	8.21413	8.00235	8.02954	8.72833	7.98544	8.09298	8.20715	8.31049	8.35743	8.07802	7.92728	8.26936
CCT6A	P40227	TCPZ	T-complex protein 1 subunit zeta	1.14549	-0.179954	No	0.0370446	-0.00900253	No	0.0217723	-0.00968695	No	10.4397	10.4128	10.5339	10.0166	9.91817	10.7143	10.7631	10.4589	10.2468	10.0377	10.5559	9.58211	10.175	10.1764	10.1688	10.1112	10.3269	9.88186	10.1271	10.3108	9.97365	10.2032	10.182	9.8306	9.60109	9.93344	9.87095	10.1014	9.91558	10.144	10.1334	9.71306	9.97728	9.69429
CCT7	Q99832	TCPH	T-complex protein 1 subunit eta	0.450222	-0.101896	No	0.0617213	-0.0208459	No	0.168254	-0.0861362	No	9.17602	9.33474	9.21524	8.88412	8.84054	9.37091	9.52124	8.95135	9.1862	8.93045	9.38508	8.40513	8.94255	9.00654	8.91231	9.17968	8.9687	8.87812	9.0588	9.02497	8.80054	9.22524	9.01178	8.61473	8.21206	8.88169	8.66569	9.06381	8.94141	8.98303	9.03441	8.48652	8.88043	8.64078
CCT8	P50990	TCPQ	T-complex protein 1 subunit theta	0.881383	-0.193444	No	0.0121778	-0.0036025	No	0.0710079	0.0294385	No	10.2932	10.4994	10.6943	10.1692	10.279	10.5217	10.8791	10.5727	10.5959	10.333	10.4998	9.80746	10.2846	10.1734	10.2282	10.49	10.0399	9.9348	10.4676	10.1926	10.4049	10.4652	10.2674	9.90711	9.61379	9.74307	9.94068	10.3426	10.1181	10.1095	10.1792	9.43586	9.86567	9.92963
CD44	P16070	CD44	CD44 antigen	NaN	0	No	0	-0.925018	No	0.262136	-1.2323	No	NaN	NaN	NaN	NaN	NaN	NaN	NaN	NaN	NaN	NaN	NaN	NaN	NaN	5.38943	NaN	6.05146	NaN	NaN	NaN	NaN	NaN	6.97647	NaN	NaN	NaN	NaN	5.25246	9.11028	NaN	8.21216	NaN	NaN	7.91319	8.91414
CD47	Q08722	CD47	Leukocyte surface antigen CD47	1.19205	-0.532889	No	0.309023	0.131478	No	0.349547	-0.395969	No	7.43466	7.24353	7.60065	7.50064	7.31334	7.95841	8.12453	7.33726	8.37005	7.96702	7.30897	7.39574	7.65361	6.98855	7.13772	7.50494	7.16954	7.06513	6.80725	7.22017	7.06144	7.87714	7.62525	7.42723	5.71675	7.44704	6.47513	7.19589	7.74081	6.79293	7.81496	7.25482	7.06771	NaN
CD59	P13987	CD59	CD59 glycoprotein	1.58644	-0.509473	No	0.052693	-0.0304689	No	1.95548	-0.899638	No	6.12041	6.70036	7.15403	6.50564	7.18526	6.53305	7.44479	7.37786	7.46145	7.39592	6.04173	5.99909	6.28858	6.54255	6.89762	7.40831	5.65547	5.37756	7.0855	6.66972	7.00083	7.5716	5.81371	6.07384	4.98639	3.95231	6.15728	4.87505	6.48427	6.60716	6.15118	5.69655	6.3149	6.00235
CDA	P32320	CDD	Cytidine deaminase	0.502259	1.14695	No	0	NaN	No	0.486916	1.31213	No	NaN	NaN	NaN	6.81016	8.5197	6.86253	5.93581	6.56786	6.28111	6.75485	6.1499	NaN	NaN	6.35424	NaN	NaN	NaN	NaN	8.12105	NaN	6.89763	5.8497	NaN	7.21505	6.26451	7.516	8.0025	5.64834	7.25738	6.64018	NaN	NaN	5.9531	NaN
CDC37	Q16543	CDC37	Hsp90 co-chaperone Cdc37	0.0534875	0.0486406	No	0.749062	-0.312356	No	0.150587	-0.104527	No	6.54121	6.25159	7.49707	7.01417	7.07334	6.2139	7.01499	6.44719	7.43769	7.02041	6.56852	6.68593	6.84422	5.50686	6.76301	6.83084	6.6233	6.35268	7.21273	6.62528	6.92667	7.33286	6.63362	6.14299	6.16325	5.69908	6.69352	6.42583	6.60433	6.85891	7.0051	4.75085	6.7927	6.37356
CDC42	P60953	CDC42	Cell division control protein 42 homolog	0.492885	-0.396727	No	0.247799	-0.0746008	No	0.174022	-0.103073	No	7.296	6.36091	7.88932	7.79849	7.79105	7.05196	8.11005	8.21568	7.79465	7.94706	7.36922	6.94535	7.13512	7.30463	6.88692	7.62786	7.12704	6.78801	7.57387	7.16517	7.2808	7.78183	7.46716	6.55482	6.35327	6.62876	6.37148	6.26213	7.31731	6.76536	7.48228	6.15175	6.1714	6.36796
CDC42BPA	Q5VT25	MRCKA	Serine/threonine-protein kinase MRCK alpha	0	NaN	No	0	NaN	No	0	NaN	No	5.32952	NaN	4.80135	NaN	NaN	NaN	5.51	NaN	3.35007	4.11918	NaN	5.17327	4.18509	NaN	NaN	NaN	NaN	NaN	NaN	NaN	NaN	NaN	NaN	NaN	NaN	NaN	NaN	5.69996	NaN	NaN	NaN	NaN	NaN	NaN
CDC42BPB	Q9Y5S2	MRCKB	Serine/threonine-protein kinase MRCK beta	0.904815	-0.30501	No	1.15313	-0.228248	No	0.165475	0.0351557	No	5.77423	5.76152	6.23755	5.79906	6.18376	5.84306	6.49882	6.27504	6.43815	6.2261	5.85661	4.99301	5.6293	5.7133	6.38802	6.3501	5.99379	5.09324	5.97961	6.31638	6.27951	6.63732	6.09288	5.97113	NaN	NaN	5.87315	5.62932	6.16232	5.87756	5.85637	5.13581	5.98488	5.4011
CDC42EP4	Q9H3Q1	BORG4	Cdc42 effector protein 4	0.134272	-0.140771	No	0.26722	-0.0992284	No	0.014792	-0.0125626	No	5.42715	NaN	6.23551	6.41623	6.21509	6.52682	6.38826	6.62099	5.89609	5.81316	6.33894	5.60666	6.41694	6.55247	6.25682	6.94556	6.91561	NaN	6.08837	6.4985	6.38529	7.11911	5.42401	7.11243	NaN	5.97683	6.69427	7.26429	5.87132	7.56207	6.87679	5.42352	7.19997	6.47775
CDH1	P12830	CADH1	Cadherin-1	0	NaN	No	0	-2.79677	No	0	NaN	No	NaN	NaN	NaN	6.4269	NaN	6.01944	4.78224	5.43859	NaN	5.44901	NaN	NaN	4.76751	NaN	5.23986	NaN	NaN	NaN	7.56428	NaN	NaN	NaN	NaN	6.0196	NaN	NaN	NaN	NaN	NaN	NaN	NaN	NaN	NaN	NaN
CDH10	Q9Y6N8	CAD10	Cadherin-10	0.2266	-0.444928	No	1.01508	0.604993	No	0	0.691489	No	NaN	7.96008	8.80441	NaN	9.17294	6.75687	9.74422	8.97307	8.66788	8.55494	8.49344	NaN	9.64225	NaN	8.89139	9.39866	NaN	NaN	8.64139	9.26737	8.56266	8.91327	8.84773	NaN	8.60609	NaN	NaN	NaN	8.15624	NaN	NaN	NaN	NaN	NaN
CDH13	P55290	CAD13	Cadherin-13	0.418584	-0.158539	No	0.654063	-0.128522	No	0.280537	-0.105667	No	5.60232	7.78694	7.30577	7.25762	7.53252	6.28586	7.8173	7.09518	7.61674	7.46279	6.09426	NaN	6.92986	7.02161	7.53847	6.84976	6.25043	NaN	6.90445	7.36473	7.41833	7.13863	6.33518	5.69171	6.22421	NaN	5.97268	5.81666	6.06355	6.09739	6.29458	5.91265	6.46603	5.64722
CDH2	P19022	CADH2	Cadherin-2	0.45641	-0.287817	No	0.251774	-0.123272	No	1.3024	-0.453283	No	6.51492	6.29795	7.56916	7.52421	7.20277	6.35056	7.64896	7.54714	7.62143	7.38001	6.44877	5.92616	6.64361	6.29312	7.00099	7.13474	6.84381	6.58016	6.16539	6.87851	6.69161	7.02757	6.16194	7.00178	6.1447	5.06235	5.81183	5.70295	7.09895	7.23474	7.15807	5.50173	5.80202	5.80975
CDK14	O94921	CDK14	Cyclin-dependent kinase 14	0	NaN	No	NaN	0	No	0	NaN	No	NaN	3.86532	NaN	NaN	NaN	NaN	NaN	6.05869	6.78169	NaN	NaN	NaN	NaN	NaN	NaN	NaN	NaN	NaN	NaN	NaN	NaN	NaN	NaN	NaN	NaN	NaN	5.92218	NaN	NaN	5.88723	NaN	NaN	NaN	NaN
CDK5	Q00535	CDK5	Cyclin-dependent kinase 5	0.196818	-0.147378	No	0.55873	-0.209466	No	0.0486929	-0.0236622	No	8.06156	8.42284	8.40074	7.87481	8.39532	7.40052	8.61703	8.87429	8.87235	8.128	7.61528	6.56624	8.26315	8.30481	7.63246	8.35634	8.01553	6.90601	7.83317	8.56106	8.41382	8.26547	7.64076	7.63989	6.86263	7.3069	7.81543	7.66845	8.08924	7.57547	7.3284	6.76653	7.98569	7.33069
CDS2	O95674	CDS2	Phosphatidate cytidylyltransferase 2	0.110082	0.188584	No	0.0466379	0.113815	No	0	-0.068758	No	6.91577	NaN	4.58165	7.26075	6.72864	4.91174	4.93537	5.075	7.58114	7.16458	NaN	5.85344	NaN	7.23153	6.00373	6.75103	6.94452	NaN	6.68688	5.80675	7.29755	6.54055	6.48649	6.47837	NaN	NaN	6.93021	NaN	NaN	6.54713	NaN	NaN	NaN	NaN
CDSN	Q15517	CDSN	Corneodesmosin	0.554551	-1.03863	No	0.462945	0.784412	No	0.380097	0.616881	No	8.37889	9.78389	11.3757	11.9405	11.7043	12.4081	10.938	11.6321	10.9502	12.448	11.3885	12.3491	10.8182	11.5522	10.2447	10.7881	8.86643	9.15837	11.0775	11.0069	12.0936	10.2315	11.8528	13.3593	11.7932	10.9413	13.3695	11.1123	12.6556	11.7795	9.56648	11.5565	10.7731	12.396
CDV3	Q9UKY7	CDV3	Protein CDV3 homolog	0	-0.0446491	No	0	NaN	No	NaN	0	No	NaN	NaN	NaN	5.96172	5.9628	NaN	5.98832	6.29478	NaN	6.00745	5.49794	NaN	NaN	NaN	NaN	7.13102	NaN	NaN	NaN	6.71205	NaN	NaN	NaN	NaN	NaN	NaN	NaN	NaN	NaN	NaN	NaN	NaN	NaN	NaN
CELF2	O95319	CELF2	CUGBP Elav-like family member 2	0.741481	0.645653	No	2.30143	1.09189	Yes	2.85404	1.18764	Yes	7.47532	7.17096	7.93331	6.93758	6.97888	NaN	6.89097	6.26582	6.98796	6.29338	7.97929	6.36749	7.7081	7.64073	6.82147	7.76964	6.49572	6.07875	5.84987	6.38114	6.08756	6.84232	6.99603	7.71328	6.69406	6.95902	7.19979	6.86904	5.57099	6.12053	5.73484	6.1969	6.00071	NaN
CEND1	Q8N111	CEND	Cell cycle exit and neuronal differentiation protein 1	0.335456	-0.197895	No	1.79888	-0.323637	No	0.0290741	0.0230706	No	7.33588	7.30458	8.02724	7.96349	7.66115	6.75307	8.25687	8.19553	8.23569	7.84066	6.79708	6.93061	7.46664	7.29106	7.42113	8.18987	6.93632	7.493	7.92374	7.56535	7.92498	8.19481	7.76445	7.13149	7.67738	6.48095	6.73949	7.41333	8.01561	7.31132	8.50172	6.17542	6.80008	6.26451
CENPV	Q7Z7K6-3	CENPV	Centromere protein V	2.64655	2.38775	Yes	1.12448	1.40654	No	0	1.02458	No	7.82756	7.51811	6.79842	6.15858	7.06114	5.31837	4.49179	4.80927	NaN	5.03483	7.14125	7.94345	7.66896	7.33083	4.21853	6.70887	5.17844	NaN	NaN	5.68353	NaN	6.09935	6.13104	6.81051	NaN	6.30204	6.62317	6.85837	NaN	5.78593	NaN	NaN	NaN	NaN
CEP170	Q5SW79	CE170	Centrosomal protein of 170 kDa	0.280479	0.116063	No	0.0403638	-0.0162799	No	0.686572	-0.503232	No	6.43788	7.62443	6.84113	6.05953	6.58293	6.75291	7.07078	6.38883	6.06203	6.69104	6.2786	5.54321	6.4489	6.4373	6.57657	6.90404	6.3963	5.77045	6.12491	6.9437	6.53642	6.51453	5.44912	5.99933	5.50106	NaN	6.74244	7.13659	5.96549	7.1032	6.43589	NaN	7.47483	6.36529
CEP170B	Q9Y4F5	C170B	Centrosomal protein of 170 kDa protein B	0.0569523	0.0365863	No	0.714718	-0.115251	No	0.320857	-0.16672	No	7.52353	7.4088	7.68442	7.04532	7.46785	6.77657	7.94756	7.54633	7.36346	7.31307	7.3855	7.02143	7.36579	7.4865	7.51189	7.48451	7.59946	6.91824	7.22596	7.69905	7.81898	7.68542	6.92104	6.96653	6.5882	7.08573	7.34037	7.44857	7.27251	7.55784	7.16416	7.02784	7.68876	6.63963
CEP41	Q9BYV8	CEP41	Centrosomal protein of 41 kDa	0.308344	-0.422626	No	0.244092	0.186373	No	NaN	0	No	NaN	NaN	5.21362	NaN	5.792	NaN	5.85679	6.04793	6.54254	5.80294	NaN	NaN	NaN	6.97689	NaN	6.46861	NaN	NaN	5.6724	7.02318	5.6972	6.04958	NaN	NaN	NaN	NaN	NaN	NaN	NaN	NaN	NaN	NaN	NaN	NaN
CES1	P23141	EST1	Liver carboxylesterase 1	NaN	0	No	0	NaN	No	NaN	0	No	NaN	NaN	NaN	NaN	NaN	NaN	NaN	NaN	NaN	NaN	NaN	NaN	NaN	NaN	NaN	NaN	NaN	NaN	6.2432	NaN	NaN	NaN	NaN	NaN	NaN	NaN	NaN	NaN	NaN	NaN	NaN	NaN	NaN	NaN
CES2	O00748	EST2	Cocaine esterase	0	NaN	No	0	NaN	No	0	NaN	No	NaN	NaN	NaN	NaN	NaN	NaN	NaN	NaN	NaN	4.05857	NaN	NaN	NaN	NaN	NaN	NaN	NaN	NaN	6.78485	3.04464	4.75591	NaN	NaN	5.95092	NaN	NaN	NaN	NaN	NaN	NaN	NaN	NaN	NaN	NaN
CFL1	P23528	COF1	Cofilin-1	0.820781	0.193507	No	0.497234	0.154346	No	0.416725	0.123157	No	11.4523	11.0869	11.3932	10.8101	10.9999	10.9357	11.0402	11.0029	10.8488	10.9473	10.932	10.4013	10.4573	10.7795	10.9446	10.8752	10.4447	10.11	10.6591	10.7964	10.3777	11.076	10.8844	10.6557	10.9505	10.5192	10.3591	9.98514	10.7229	10.3093	10.8678	10.4607	9.85111	10.4032
CFL2	Q9Y281	COF2	Cofilin-2	1.69322	0.652102	Yes	1.19387	0.231737	No	1.27961	0.24118	No	11.3768	11.1784	10.9396	10.3906	10.8071	10.103	10.6805	10.2561	10.1816	10.2106	10.4281	10.1688	10.8472	10.3931	10.6477	10.8155	10.4249	9.79381	10.4079	10.4938	10.172	10.6173	10.5338	10.1099	10.9783	10.0178	9.70697	9.90119	10.3568	10.044	10.7006	9.33086	9.65146	9.71718
CHCHD3	Q9NX63	MIC19	MICOS complex subunit MIC19	1.02757	-0.310292	No	0.771045	-0.142423	No	0.136872	-0.0855761	No	7.94169	7.95216	8.66687	8.0599	8.42049	8.33778	8.70945	8.65497	8.45049	8.43988	7.57347	7.04283	8.23926	8.02483	8.30371	8.62637	8.01713	7.13299	8.01412	8.22543	8.51144	8.76391	8.1857	8.0183	6.93994	7.92748	7.90447	8.19292	8.11095	8.19195	7.90807	7.19726	8.28126	7.99278
CHCHD6	Q9BRQ6	MIC25	MICOS complex subunit MIC25	0.0969975	-0.0418985	No	0.513729	-0.11961	No	0.864344	-0.327376	No	7.33449	7.49145	7.66059	7.5839	7.55336	7.57126	7.63357	7.53292	8.00666	7.08888	6.57605	6.56322	7.49916	7.5861	7.724	7.89353	7.06801	6.72808	7.39494	7.92807	7.5902	7.85041	7.05053	7.29079	6.65713	7.356	7.53107	7.83414	7.48443	7.74965	7.58022	7.52526	7.96093	7.38343
CHGB	P05060	SCG1	Secretogranin-1	0.606454	0.21891	No	0.340615	-0.0885146	No	0.0781609	-0.0583537	No	8.21784	8.49491	7.96768	8.48314	7.24137	7.64921	8.15685	7.87551	8.04	7.58881	8.80633	7.38955	7.62048	7.89387	7.66956	8.8778	8.59327	7.67496	7.4491	8.09444	8.12868	8.84823	7.43884	8.4291	8.09788	7.35271	7.83478	8.91671	8.03753	8.70761	8.54611	7.21063	8.17505	7.74321
CHI3L1	P36222	CH3L1	Chitinase-3-like protein 1	0.0736169	0.0605851	No	0.154612	0.192364	No	1.07463	0.537421	No	NaN	6.12699	7.62099	7.82336	7.56163	8.12115	6.28079	7.50573	7.01294	8.09116	7.27623	7.45885	6.36063	8.04038	6.5605	6.65428	NaN	6.51899	6.54104	7.11124	7.47965	NaN	7.53212	8.09261	NaN	NaN	7.88783	NaN	NaN	7.48368	NaN	NaN	7.42192	7.17078
CHL1	O00533	NCHL1	Neural cell adhesion molecule L1-like protein	0.920911	0.346938	No	0.137	0.0501212	No	0.155712	-0.131157	No	7.08879	7.83669	7.06568	6.52114	6.90924	6.11458	7.36957	6.84131	6.51135	6.85004	6.99888	NaN	6.85523	6.49586	6.39747	6.48383	NaN	NaN	6.4695	6.40608	6.42435	6.73198	6.43841	6.08348	7.03063	7.12528	7.17331	6.71978	6.7502	7.22169	7.71317	5.99158	7.01738	6.66381
CHMP2A	O43633	CHM2A	Charged multivesicular body protein 2a	2.33258	0.377093	No	1.0078	0.281403	No	0.313121	0.0660676	No	7.98656	8.04761	7.46707	7.13487	7.04427	7.82833	7.64834	7.07789	6.56149	6.67887	7.87415	7.11165	7.29326	7.36584	7.44125	7.54735	7.7491	6.83909	6.92558	7.56955	6.60341	7.25835	7.46366	7.38215	6.97705	7.48491	6.83009	7.0084	7.52796	7.25614	7.25102	7.19626	6.78956	6.72892
CHMP3	Q9Y3E7	CHMP3	Charged multivesicular body protein 3	0.266633	0.11552	No	0.0985638	0.127746	No	0	1.01492	No	5.99523	NaN	4.79912	5.67243	4.91224	5.86936	4.43703	4.96264	NaN	4.52802	5.83146	NaN	NaN	5.40263	NaN	5.19729	NaN	NaN	5.24193	5.66175	NaN	4.68268	5.7397	4.86125	NaN	NaN	5.73752	NaN	4.72479	NaN	NaN	NaN	NaN	NaN
CHMP4A	Q9BY43	CHM4A	Charged multivesicular body protein 4a	1.20176	0.537603	No	0.0442334	0.0558784	No	0.058068	-0.0584472	No	9.22005	9.59507	8.61478	9.03251	8.54586	9.44196	8.79377	8.16809	8.03222	7.88421	NaN	NaN	9.01189	8.2333	9.0104	8.31326	9.35555	NaN	8.97194	8.99522	7.78734	8.59083	NaN	8.09273	NaN	NaN	8.48646	8.96949	9.06544	8.80569	8.88304	NaN	8.24456	8.67377
CHMP4B	Q9H444	CHM4B	Charged multivesicular body protein 4b	0.867373	-0.511996	No	0.138254	0.0812278	No	0.367865	0.439893	No	6.45137	5.9195	7.32785	6.69414	6.30842	6.16855	7.02896	7.57276	7.02575	7.46524	6.99834	NaN	6.64465	6.69452	6.82912	7.18335	6.1435	6.17876	7.09077	6.78221	6.91899	7.00837	6.93631	6.90105	NaN	5.60262	7.14324	5.85954	6.65472	7.14372	6.21311	NaN	5.86248	NaN
CHMP5	Q9NZZ3	CHMP5	Charged multivesicular body protein 5	0.230007	-0.218973	No	0.535198	0.0920546	No	0	NaN	No	5.78617	5.04053	6.49433	5.83295	7.3119	6.25291	6.21071	6.39746	6.42546	6.27421	6.25233	NaN	NaN	6.53617	NaN	6.61692	NaN	NaN	6.84888	6.39873	NaN	6.57025	NaN	NaN	NaN	NaN	NaN	NaN	6.82107	NaN	NaN	NaN	NaN	NaN
CHMP6	Q96FZ7	CHMP6	Charged multivesicular body protein 6	0.00732655	0.021167	No	0	0.284312	No	NaN	0	No	NaN	NaN	NaN	6.70273	7.04625	NaN	6.32913	6.16753	7.48691	6.21973	NaN	NaN	NaN	NaN	NaN	7.68431	7.27004	NaN	NaN	NaN	7.75836	7.4	NaN	NaN	NaN	NaN	NaN	NaN	NaN	NaN	NaN	NaN	NaN	NaN
CHN1	P15882	CHIN	N-chimaerin	0.511956	-0.713361	No	0.252121	-0.756594	No	NaN	0	No	NaN	5.85745	6.86149	8.64918	7.60763	NaN	6.35102	8.80027	7.85803	8.81987	NaN	NaN	NaN	7.84107	5.78347	5.34944	5.22724	NaN	8.0752	6.42228	7.48897	7.33251	NaN	NaN	NaN	NaN	NaN	NaN	NaN	NaN	NaN	NaN	NaN	NaN
CHP1	Q99653	CHP1	Calcineurin B homologous protein 1	0	NaN	No	0	NaN	No	NaN	0	No	NaN	NaN	NaN	NaN	NaN	NaN	5.08071	4.57205	4.74272	5.06218	NaN	NaN	NaN	4.94396	NaN	NaN	NaN	NaN	NaN	NaN	NaN	NaN	NaN	NaN	NaN	NaN	NaN	NaN	NaN	NaN	NaN	NaN	NaN	NaN
CHTOP	Q9Y3Y2	CHTOP	Chromatin target of PRMT1 protein	0	NaN	No	0	1.23264	No	0	NaN	No	NaN	NaN	4.30447	NaN	4.31331	NaN	NaN	NaN	NaN	NaN	NaN	NaN	NaN	3.09014	NaN	4.50276	NaN	NaN	NaN	NaN	NaN	3.27013	NaN	4.11246	NaN	NaN	NaN	NaN	NaN	NaN	NaN	NaN	NaN	NaN
CIAO2B	Q9Y3D0	CIA2B	Cytosolic iron-sulfur assembly component 2B	0.294554	-0.254993	No	0.0385352	0.0520844	No	0	-0.444448	No	6.95148	6.14071	5.29335	6.28819	6.38836	NaN	5.70547	6.47239	6.54478	6.40796	5.90728	NaN	NaN	6.20842	6.87717	NaN	NaN	NaN	NaN	6.54453	6.43689	7.1338	NaN	6.27247	NaN	NaN	6.88236	6.55429	NaN	6.71692	NaN	NaN	NaN	NaN
CISD1	Q9NZ45	CISD1	CDGSH iron-sulfur domain-containing protein 1	0.59959	-0.283882	No	0.0214066	0.0196917	No	0.715038	-0.383452	No	6.24719	NaN	7.42627	6.10548	6.99333	6.05498	7.1161	7.73816	6.89058	7.22408	5.60644	NaN	6.99327	6.02566	6.83447	6.74263	6.55762	5.60914	6.10647	6.11317	6.43143	6.8953	6.11083	5.89922	5.88111	NaN	NaN	6.10598	6.61405	6.1629	NaN	NaN	5.90426	NaN
CKAP4	Q07065	CKAP4	Cytoskeleton-associated protein 4	0.649479	0.351251	No	0.800075	0.787656	No	1.72766	0.418906	No	6.69936	5.92704	6.82588	7.30102	7.08479	6.76663	5.71894	6.34162	6.06831	7.18633	7.54388	6.91752	6.5131	6.95943	6.69764	6.36828	5.44445	4.76627	7.19913	5.99561	6.44346	6.42499	6.87521	7.47308	6.61749	6.9007	6.894	6.76665	6.55157	6.78547	6.2636	NaN	NaN	6.45616
CKAP5	Q14008	CKAP5	Cytoskeleton-associated protein 5	0.307322	-0.197529	No	0.784482	-0.269146	No	0.513397	0.840715	No	5.5136	NaN	6.20852	5.54524	5.96589	NaN	6.35862	6.57955	6.03865	5.69403	5.05032	NaN	5.21554	5.64803	4.92831	5.79167	5.57636	5.64804	5.69275	5.32224	5.38353	6.00471	NaN	5.70281	NaN	NaN	5.56261	NaN	NaN	5.30153	5.70103	4.54007	4.28245	NaN
CKB	P12277	KCRB	Creatine kinase B-type	1.96188	-0.44762	No	0.552052	-0.140498	No	1.14846	-0.244768	No	13.5256	13.7493	14.219	13.7609	14.4944	13.9479	14.469	14.6637	14.3039	14.6027	12.7975	12.4783	13.8343	14.3858	13.8888	14.1507	13.3372	12.5102	13.5218	14.4917	14.1903	14.3271	13.9709	13.5591	12.7583	12.5878	13.641	13.2137	14.1931	14.0503	13.3709	12.6236	13.5704	13.3911
CKM	P06732	KCRM	Creatine kinase M-type	1.13935	-0.259979	No	0.342088	-0.157368	No	0.0394626	-0.0161107	No	9.18203	9.30919	9.53559	9.67419	9.90832	9.09311	9.68277	9.96153	9.78756	10.3843	8.26576	8.69535	9.35151	10.2721	9.45037	9.9023	9.00911	NaN	9.16096	10.0523	9.91016	9.89634	9.39146	9.42996	NaN	NaN	9.60788	8.99292	9.75758	9.41626	8.85057	8.34947	9.31054	9.00228
CKMT1A	P12532	KCRU	Creatine kinase U-type, mitochondrial	0.350564	-0.0843718	No	0.853877	-0.145204	No	0.540763	-0.138435	No	11.6996	11.9225	11.4489	11.1465	11.0547	11.6077	12.109	11.5031	11.5586	10.9156	11.0653	10.5333	11.2786	11.3282	11.5773	11.4131	11.1827	10.8294	11.3014	11.7343	11.4114	11.608	11.2483	11.27	11.1303	10.7538	11.3046	11.8624	11.508	11.2531	11.5155	10.5858	11.813	11.7246
CKMT2	P17540	KCRS	Creatine kinase S-type, mitochondrial	1.56584	2.33013	Yes	0.0594445	0.201304	No	0.240633	0.167587	No	7.8754	5.87174	NaN	6.40695	NaN	5.44575	3.64113	NaN	NaN	NaN	6.55809	NaN	NaN	5.71207	NaN	NaN	5.36849	NaN	NaN	6.49906	NaN	NaN	6.37805	4.11157	NaN	6.15216	NaN	NaN	6.42277	NaN	NaN	5.77226	NaN	NaN
CLASP1	Q7Z460	CLAP1	CLIP-associating protein 1	0.434767	-0.153248	No	0.413617	-0.207538	No	0	0.801394	No	4.80227	4.8114	5.00593	5.83546	6.01022	4.84595	4.64953	5.73569	5.93088	6.06945	5.64263	5.85734	4.58532	5.72009	4.95556	5.99922	5.13087	NaN	5.28477	5.94611	5.52163	6.05713	4.7903	6.06302	NaN	NaN	5.68847	5.16328	NaN	5.26163	5.6388	5.61519	NaN	NaN
CLASP2	O75122-3	CLAP2	CLIP-associating protein 2	0.183335	-0.0443132	No	0.9093	-0.545305	No	1.13436	-0.622476	No	7.59492	8.48266	7.89784	7.568	7.93423	7.79585	8.18615	7.91111	7.76958	8.03652	7.04738	6.18024	7.44642	7.97991	7.62634	7.92114	8.19818	7.84818	7.18072	8.3016	7.71173	8.23285	6.83861	7.46317	6.31712	7.33303	7.69057	7.92334	7.38995	7.81775	8.09161	7.69548	8.60764	7.69826
CLCA4	Q14CN2	CLCA4	Calcium-activated chloride channel regulator 4	NaN	0	No	0	NaN	No	NaN	0	No	NaN	NaN	NaN	NaN	NaN	NaN	NaN	NaN	NaN	NaN	NaN	NaN	NaN	NaN	NaN	NaN	NaN	NaN	5.95305	NaN	NaN	NaN	NaN	NaN	NaN	NaN	NaN	NaN	NaN	NaN	NaN	NaN	NaN	NaN
CLCN3	P51790	CLCN3	H(+)/Cl(-) exchange transporter 3	0.163874	0.229626	No	0	-0.0749426	No	0.433787	0.148625	No	7.34155	6.98051	6.01453	NaN	NaN	6.87193	6.04729	6.72849	NaN	NaN	NaN	NaN	NaN	7.36373	5.70388	7.13584	NaN	NaN	NaN	NaN	NaN	7.21078	6.99695	7.0953	NaN	NaN	7.13083	6.81051	6.81942	7.03178	6.23631	NaN	7.29162	6.29627
CLIC1	O00299	CLIC1	Chloride intracellular channel protein 1	0.340501	0.296597	No	0.175246	-0.274787	No	0.588144	0.468374	No	7.39857	7.57792	6.83545	7.27371	6.95435	6.65609	6.52375	7.12634	6.48269	7.76815	7.58292	6.96872	6.29443	7.80143	7.02795	6.73347	6.58636	NaN	8.77231	7.31386	7.26206	6.87954	7.69105	7.58555	6.78231	7.21091	7.23108	NaN	7.29364	7.5205	6.81103	5.77116	NaN	NaN
CLIC3	O95833	CLIC3	Chloride intracellular channel protein 3	0	NaN	No	0	NaN	No	NaN	0	No	NaN	NaN	NaN	NaN	NaN	NaN	NaN	4.96496	NaN	6.65158	NaN	NaN	NaN	NaN	NaN	NaN	NaN	NaN	6.75451	NaN	NaN	NaN	NaN	NaN	NaN	NaN	NaN	NaN	NaN	NaN	NaN	NaN	NaN	NaN
CLINT1	Q14677	EPN4	Clathrin interactor 1	2.0268	-0.414197	No	0	0.460048	No	NaN	0	No	NaN	NaN	NaN	4.99493	5.66762	NaN	NaN	5.48297	5.40301	6.08794	NaN	NaN	NaN	NaN	NaN	6.14549	NaN	NaN	6.91264	4.94459	6.23945	5.68545	NaN	NaN	NaN	NaN	NaN	NaN	NaN	NaN	NaN	NaN	NaN	NaN
CLIP1	P30622	CLIP1	CAP-Gly domain-containing linker protein 1	0.78522	0.280217	No	0.35517	-0.271753	No	0.985553	-0.585204	No	5.90286	6.68919	6.20656	6.20742	6.18957	5.56818	5.79015	6.16803	6.19138	6.07679	5.37208	6.09915	5.76685	6.09221	6.15542	5.88751	6.19256	NaN	6.5528	6.34202	5.22883	6.31661	4.92716	5.38476	6.50681	6.02165	5.18621	5.9478	5.83697	6.54877	6.49939	5.85572	6.21177	NaN
CLIP2	Q9UDT6	CLIP2	CAP-Gly domain-containing linker protein 2	0.0348794	-0.0197622	No	0.512471	-0.150417	No	0.783439	-0.290499	No	6.08642	6.56601	6.45729	6.67407	5.77683	6.64822	6.72547	6.14466	6.16585	5.97522	5.98902	5.48698	6.18044	6.30659	6.33617	6.44651	6.40856	6.00567	6.02579	6.60862	6.03928	6.56031	6.06853	6.37197	5.92978	4.86777	6.40327	6.01911	5.8831	6.48208	6.85411	5.57003	6.34069	6.27341
CLSTN1	O94985-2	CSTN1	Calsyntenin-1	0.0925689	0.0690837	No	0.0404379	-0.014697	No	0.228526	-0.102169	No	7.24834	7.32323	7.49042	7.75086	7.23416	6.17852	7.79566	7.71675	7.65945	7.35122	7.44556	6.94503	7.54873	7.49729	7.28928	7.45184	7.4867	7.47861	7.22895	7.63825	7.22303	7.21037	6.62352	6.27876	6.87924	6.1819	6.54547	6.96794	6.55476	6.78913	6.92369	6.73995	6.74325	6.33906
CLSTN3	Q9BQT9	CSTN3	Calsyntenin-3	0.0592758	0.0618693	No	0.355303	0.409484	No	0	0.237138	No	NaN	NaN	5.61997	5.63509	5.44239	NaN	4.89359	5.12514	6.24403	5.14267	NaN	NaN	5.75156	6.39944	NaN	5.67639	NaN	NaN	NaN	5.64983	NaN	5.60703	5.40504	NaN	NaN	NaN	5.84054	NaN	NaN	NaN	NaN	NaN	5.6034	NaN
CLTA	P09496	CLCA	Clathrin light chain A	1.66235	-0.344233	No	1.01757	-0.278345	No	0.134329	-0.0496217	No	9.41205	9.63935	9.98398	9.24282	9.7522	9.72152	10.1562	10.0315	9.81839	10.024	8.89629	8.28385	9.61066	9.2365	9.3021	9.52561	9.18606	9.04176	9.36247	9.47571	9.76465	9.69444	9.12432	8.97892	8.22541	8.89328	9.20005	9.49044	9.3887	9.3665	8.46048	8.57195	9.35937	9.06315
CLTB	P09497	CLCB	Clathrin light chain B	2.65149	-0.50813	No	2.44091	-0.523527	No	0.461549	-0.234661	No	7.38135	7.55498	7.8952	7.0672	7.76325	7.79568	8.16106	8.18191	7.7716	8.29239	6.78613	6.45452	7.5523	6.88913	7.32892	7.52043	7.64011	7.18793	7.7894	7.51057	7.71886	7.82571	7.28827	7.0476	6.36549	6.87552	6.77072	7.51351	7.66846	7.1277	7.57209	6.85519	6.982	7.06361
CLTC	Q00610	CLH1	Clathrin heavy chain 1	2.18599	-0.571217	No	1.45424	-0.257016	No	0.680566	-0.197678	No	11.4541	11.6284	12.061	11.368	11.8891	12.0583	12.5271	12.4511	12.0546	12.1656	10.9869	10.3431	11.5613	11.6512	11.6662	11.5207	11.4983	10.8547	11.7594	11.5962	11.8283	11.7346	11.4496	11.1678	10.3745	10.5438	11.0987	11.0538	11.5586	11.4029	11.2287	10.5461	11.1107	11.0273
CLU	P10909	CLUS	Clusterin	0.555769	-0.176748	No	0.377622	0.13081	No	0.0886031	-0.050701	No	8.87136	9.64813	9.88344	9.31813	9.0067	9.46991	9.73709	9.61565	9.48704	9.3018	9.07017	9.56755	9.05208	9.21973	9.47145	9.33329	9.02392	9.02767	9.08751	9.5423	8.86773	9.38026	9.04311	9.25279	8.40123	8.88647	9.12405	9.3365	9.00888	9.54397	9.34227	8.43805	8.99571	9.01947
CLUH	O75153	CLU	Clustered mitochondria protein homolog	0.0761339	-0.0614579	No	1.06967	0.298214	No	0	0.464716	No	6.07541	5.71523	6.16518	6.01867	6.23424	NaN	6.25518	6.07409	6.47471	5.57518	6.4324	NaN	6.4885	6.7266	6.50367	7.06447	6.26712	NaN	6.0542	6.87519	6.05131	6.47673	6.30254	5.65827	NaN	NaN	NaN	5.85394	5.83782	NaN	NaN	NaN	NaN	NaN
CLVS2	Q5SYC1	CLVS2	Clavesin-2	0.713307	-0.195375	No	0.187996	0.131249	No	0.0539415	-0.0278042	No	6.73684	7.78777	7.34822	6.41073	6.86864	6.88325	7.69763	7.29833	6.91956	7.3303	7.0771	NaN	6.83516	6.47415	7.60956	7.49855	6.84851	5.86706	6.26093	7.25951	6.89782	7.57152	6.56719	6.57217	6.54517	6.35303	7.32474	7.20585	6.46408	7.2119	6.77858	6.17607	7.54677	6.55758
CMAS	Q8NFW8	NEUA	N-acylneuraminate cytidylyltransferase	0.368265	0.540032	No	0.816801	0.632856	No	0.984858	1.88842	No	7.06836	6.38472	5.64008	6.30772	7.86163	NaN	5.71636	6.64916	5.67664	5.99186	6.70605	6.56878	6.91513	6.46711	6.11191	6.92724	NaN	NaN	7.1283	5.24206	5.68529	5.83432	7.69856	7.0895	5.45036	5.52383	7.54542	7.34304	5.39221	4.68105	5.91499	NaN	NaN	4.03951
CMPK1	P30085	KCY	UMP-CMP kinase	1.26708	-1.08871	No	0.160906	-0.235709	No	0.923747	0.486701	No	5.09861	3.77234	6.09724	6.31348	6.13511	6.70873	6.18346	6.71689	6.53461	6.71665	5.42385	NaN	4.25283	6.2129	4.36882	5.72304	4.24538	3.75838	6.05158	5.65356	5.54785	5.66162	6.44865	6.21298	NaN	4.45757	5.49907	4.13363	6.32883	5.50136	NaN	NaN	4.87041	NaN
CMTM4	Q8IZR5-2	CKLF4	CKLF-like MARVEL transmembrane domain-containing protein 4	0.146662	-0.116618	No	0.107356	0.0448675	No	0.0738142	-0.423278	No	7.13264	6.56577	7.42367	7.32932	7.46116	6.34234	7.57152	7.80289	7.45877	7.32014	7.14329	6.26573	7.32607	7.04417	6.5302	7.45872	7.07157	5.64821	7.07792	7.53769	6.55989	7.6037	5.58766	7.53292	5.21411	NaN	NaN	NaN	NaN	6.26699	7.3266	NaN	7.36871	NaN
CNDP2	Q96KP4	CNDP2	Cytosolic non-specific dipeptidase	1.27093	-0.253991	No	1.15345	-0.145965	No	0.563457	-0.218414	No	10.7433	10.9118	11.3205	10.6465	11.0411	10.8973	11.443	11.3778	11.0685	11.1466	10.5009	10.249	10.778	10.8878	10.6229	11.054	10.9089	10.39	10.8277	10.8393	10.8359	11.1665	11.3188	11.0641	10.1464	10.2626	10.1481	10.5135	11.3828	11.6171	11.0681	10.0071	10.2187	10.4702
CNKSR2	Q8WXI2	CNKR2	Connector enhancer of kinase suppressor of ras 2	1.71807	-0.586714	No	0.612241	-0.317918	No	0.969199	-0.256196	No	7.16399	6.82584	7.6343	6.89989	7.76359	7.55291	7.83148	8.10562	7.78287	7.94829	6.23905	NaN	7.0958	7.13017	7.10213	7.59086	7.14324	5.93098	6.71487	7.37732	7.85246	7.65971	6.83546	6.6399	NaN	5.96717	6.49746	6.43412	7.12637	6.66635	6.43704	NaN	6.65234	6.98667
CNOT1	A5YKK6	CNOT1	CCR4-NOT transcription complex subunit 1	0	0.702352	No	0	-0.108607	No	0	NaN	No	6.24689	NaN	5.28587	NaN	NaN	5.54454	4.75871	NaN	NaN	NaN	NaN	NaN	NaN	NaN	NaN	5.52222	NaN	NaN	4.84832	4.34323	4.94744	5.63083	5.4922	NaN	NaN	NaN	5.93519	NaN	NaN	NaN	NaN	NaN	NaN	NaN
CNP	P09543	CN37	2',3'-cyclic-nucleotide 3'-phosphodiesterase	2.15136	-0.729034	No	2.13129	-0.419756	No	0.788847	-0.342442	No	8.69864	8.88643	10.3617	9.45142	10.8197	9.30617	9.96606	11.397	10.0475	11.1463	9.26337	8.65294	9.48348	8.80611	9.70723	9.4276	10.0428	9.2147	9.56474	9.23921	10.0439	9.75394	9.52134	9.46414	8.74749	8.65883	9.24516	9.27152	9.83275	10.029	9.76739	8.58899	9.87395	8.87107
CNPY2	Q9Y2B0	CNPY2	Protein canopy homolog 2	0.192633	-0.360493	No	0.887095	0.242921	No	0.649643	0.441397	No	7.76209	5.0081	8.09275	7.39216	8.10837	NaN	7.35987	7.45555	7.71025	7.51769	6.79803	NaN	7.40361	7.8088	7.55563	8.14507	6.76429	NaN	6.98313	7.15454	7.43512	8.15944	7.51083	7.20311	NaN	6.38766	7.63003	7.59253	7.10094	NaN	6.09334	6.45253	7.46744	6.33454
CNPY3	Q9BT09	CNPY3	Protein canopy homolog 3	1.1058	0.592484	No	0.464684	0.394681	No	0.689582	0.774533	No	7.33431	6.33488	6.66907	7.06876	6.31271	NaN	NaN	5.72643	6.61383	5.93285	7.15759	NaN	7.21549	6.74018	6.92332	7.98023	NaN	NaN	NaN	NaN	6.76459	7.34961	6.76858	6.80428	7.03477	NaN	NaN	7.17335	NaN	6.60298	6.49822	NaN	NaN	5.5876
CNRIP1	Q96F85	CNRP1	CB1 cannabinoid receptor-interacting protein 1	0.269015	-0.322761	No	0.284539	-0.13128	No	0.128267	-0.0484154	No	6.7493	6.61052	7.90763	6.8822	7.67909	5.37185	7.92702	8.10994	8.05173	7.98201	6.29998	7.20148	7.19646	7.26803	6.8946	7.56914	7.06897	6.79719	6.84515	7.42804	7.41204	7.66596	7.08824	6.17279	6.73092	6.58642	6.1766	5.98022	6.86802	6.80229	6.39541	6.78001	6.1158	6.06415
CNTN1	Q12860	CNTN1	Contactin-1	1.90393	-0.418442	No	1.83398	-0.331842	No	1.15042	-0.347469	No	10.9829	11.498	11.7237	11.1028	11.5804	11.3893	12.0088	11.8867	11.8309	11.8643	10.7828	10.3531	11.3361	11.0083	11.3002	11.3921	11.3271	10.979	11.466	11.1994	11.4059	11.7861	11.2445	10.8727	10.74	10.7676	10.8376	10.785	11.3869	11.3431	11.6473	10.9063	11.3976	10.6509
CNTN2	Q02246	CNTN2	Contactin-2	0.163069	-0.184703	No	0.460644	-0.172056	No	2.39492	-0.492447	No	7.35529	7.411	7.35166	7.37849	7.5201	6.11587	8.11427	8.13812	8.39491	7.17689	7.40859	NaN	7.27004	7.35978	7.92974	7.21819	7.90003	7.33146	7.74075	7.49718	7.52922	7.37944	6.55931	6.69943	6.74417	6.37418	7.12985	7.19577	7.1246	7.15213	7.54445	6.9925	7.56497	7.27874
CNTNAP1	P78357	CNTP1	Contactin-associated protein 1	2.28012	-0.550049	No	1.4842	-0.316371	No	1.41312	-0.493052	No	8.19712	8.78418	8.842	8.77526	8.96234	8.71207	9.40079	9.23228	9.67134	9.29467	8.11011	7.90001	8.51011	8.88663	8.88485	8.96005	8.94619	8.0282	8.76935	9.01382	9.1226	9.26984	8.24823	8.64148	7.76265	7.93741	8.49814	8.6311	8.96496	8.94151	9.00036	8.17339	8.95275	8.64433
CNTNAP2	Q9UHC6	CNTP2	Contactin-associated protein-like 2	0.539202	-0.208395	No	0.381985	-0.299785	No	1.8519	-0.396952	No	7.13826	7.77699	7.61479	7.05851	7.5709	6.71503	8.00442	7.88787	7.66013	7.93395	6.2578	7.21114	7.43857	6.87307	7.46358	7.01547	7.61213	NaN	7.25836	7.30019	6.87744	7.49928	6.61573	6.44079	6.8718	NaN	6.41418	5.72132	7.12926	6.68081	7.20292	7.25121	6.60606	6.42952
COA3	Q9Y2R0	COA3	Cytochrome c oxidase assembly factor 3 homolog, mitochondrial	0.524504	0.340444	No	0.0666285	-0.0220868	No	0.0234959	0.0149994	No	NaN	8.12044	7.78498	7.06953	7.34246	5.79678	7.729	7.44511	7.41822	6.36332	6.75842	6.94298	6.8415	6.45955	6.96665	7.60703	6.44837	6.61324	6.95251	6.59825	7.37128	7.725	NaN	6.84851	7.01439	7.49785	6.51207	6.84902	NaN	7.53969	6.88732	6.966	6.71276	6.54107
COASY	Q13057	COASY	Bifunctional coenzyme A synthase	0	-0.454374	No	0	NaN	No	NaN	0	No	NaN	NaN	5.16543	NaN	NaN	NaN	4.93251	5.6198	4.77194	5.04356	NaN	NaN	NaN	NaN	NaN	NaN	NaN	NaN	NaN	6.91749	NaN	NaN	NaN	NaN	NaN	NaN	NaN	NaN	NaN	NaN	NaN	NaN	NaN	NaN
COL1A1	P02452	CO1A1	Collagen alpha-1(I) chain	0.118981	-0.112961	No	0.113907	-0.27233	No	0.505951	0.274408	No	6.19126	NaN	7.29955	5.95212	5.98673	7.00066	NaN	7.06622	5.29575	6.51889	5.61696	6.15779	6.83607	6.11183	7.36941	6.8836	NaN	9.78797	5.567	5.93697	6.59235	6.83605	NaN	6.53708	6.90995	6.46987	6.25608	7.48605	5.20909	6.87803	6.37789	NaN	6.03204	6.80358
COL1A2	P08123	CO1A2	Collagen alpha-2(I) chain	0.232824	0.407915	No	0.496014	0.691354	No	0.446	-0.636837	No	NaN	NaN	6.29077	6.54932	5.18107	6.92339	NaN	5.3754	5.39181	6.03022	NaN	NaN	6.32744	6.08248	6.23084	6.16623	NaN	9.80761	NaN	4.36559	5.85012	6.18978	NaN	4.67326	NaN	6.97542	6.68395	5.84525	NaN	5.82311	5.47759	NaN	6.24533	7.04453
COL4A1	P02462	CO4A1	Collagen alpha-1(IV) chain	0.357003	0.296744	No	1.64361	0.462238	No	0.0779476	-0.0610189	No	7.13491	6.09688	8.65976	7.94512	7.9049	6.90955	7.07219	8.22384	6.92842	7.12385	6.85009	7.293	7.29936	7.59091	8.11068	8.69506	NaN	6.53265	7.18001	6.84082	7.6974	8.42694	8.02371	7.7182	7.24936	7.78908	7.64822	9.14173	8.29883	8.71931	7.61	6.8492	7.81192	8.64716
COL4A2	P08572	CO4A2	Collagen alpha-2(IV) chain	0.753246	0.632392	No	1.30821	0.293089	No	0.330898	-0.307636	No	7.10286	5.95633	8.78133	8.15156	8.39482	6.30448	6.56089	8.57628	6.53143	7.25185	NaN	NaN	7.03814	6.63713	8.11153	8.15968	NaN	NaN	6.57318	6.56498	7.6918	7.94417	7.66389	7.06648	6.65339	6.77431	NaN	8.63582	8.19168	8.45185	7.37235	6.44253	NaN	7.87365
COL6A3	P12111	CO6A3	Collagen alpha-3(VI) chain	0	-1.46821	No	0	NaN	No	0	NaN	No	NaN	NaN	3.69411	NaN	NaN	NaN	NaN	5.16232	NaN	NaN	NaN	NaN	NaN	1.86609	5.1097	NaN	NaN	NaN	NaN	NaN	NaN	NaN	NaN	NaN	NaN	NaN	NaN	6.47464	NaN	NaN	NaN	NaN	NaN	NaN
COMT	P21964	COMT	Catechol O-methyltransferase	0	NaN	No	0	NaN	No	0	NaN	No	NaN	NaN	NaN	NaN	4.08938	NaN	NaN	3.30709	NaN	NaN	NaN	NaN	NaN	NaN	NaN	5.22755	NaN	NaN	3.3018	NaN	NaN	NaN	NaN	NaN	NaN	NaN	NaN	NaN	NaN	NaN	NaN	NaN	5.38338	NaN
COPA	P53621	COPA	Coatomer subunit alpha	0.669616	-0.178588	No	1.16143	0.296585	No	0.853501	0.325575	No	7.64991	7.15506	7.64894	7.44614	7.50015	8.12379	7.62661	7.63393	7.47439	7.43442	7.61565	7.29474	7.38042	8.06138	7.31691	7.57805	7.24104	6.50648	7.51954	7.67399	7.24133	7.28525	7.65111	7.26588	6.91761	7.43314	7.4561	6.55961	7.15816	6.97162	6.94923	6.81902	6.53431	6.89766
COPB2	P35606	COPB2	Coatomer subunit beta'	0.024683	-0.0127325	No	0.682037	0.395523	No	1.94666	1.10341	Yes	6.96691	6.05279	5.93656	6.12529	6.45105	6.51291	6.09339	6.22763	5.83938	6.92295	6.97037	6.43423	5.85355	6.67092	6.08707	6.70671	5.95814	NaN	6.16892	5.95777	6.23838	5.98779	6.9296	6.62671	NaN	7.0267	6.55087	NaN	5.80589	5.99901	NaN	5.43372	5.4816	6.06307
COPG1	Q9Y678	COPG1	Coatomer subunit gamma-1	0.15834	0.0756569	No	0.42956	0.611886	No	0	NaN	No	6.51254	5.67795	5.72503	6.53807	NaN	NaN	5.7784	5.80655	6.12913	6.03524	7.05369	NaN	NaN	6.97713	NaN	6.8294	6.03723	NaN	6.33527	NaN	NaN	6.62208	NaN	5.75325	NaN	NaN	6.8554	NaN	5.7457	NaN	NaN	NaN	NaN	NaN
COPS2	P61201	CSN2	COP9 signalosome complex subunit 2	0	NaN	No	NaN	0	No	NaN	0	No	NaN	NaN	NaN	NaN	NaN	NaN	4.34756	3.58134	4.56771	4.86199	NaN	NaN	NaN	NaN	NaN	NaN	NaN	NaN	NaN	NaN	NaN	NaN	NaN	NaN	NaN	NaN	NaN	NaN	NaN	NaN	NaN	NaN	NaN	NaN
COPS3	Q9UNS2	CSN3	COP9 signalosome complex subunit 3	0.0170443	0.00793104	No	0.0865336	-0.0525951	No	0.776274	0.414516	No	6.39278	6.86917	7.21214	6.72894	6.85481	6.83782	6.89082	6.7386	6.54786	7.00309	6.54496	5.80415	6.74282	6.48141	6.87256	6.36845	6.20414	6.71086	6.61827	6.47379	6.31947	6.80339	6.80508	6.62289	NaN	6.40588	6.45926	6.33615	6.52397	5.81932	6.47427	NaN	5.71157	6.51046
COPS4	Q9BT78	CSN4	COP9 signalosome complex subunit 4	2.70264	-0.162074	No	0.0390792	0.00755819	No	0.1636	-0.042178	No	7.39235	7.87966	7.88387	7.67943	7.44486	7.54628	7.97074	8.06762	7.90855	7.59735	7.35886	7.15478	7.56755	7.64976	7.53966	7.61881	7.31108	7.31482	7.41068	7.86392	7.50835	7.43522	7.05868	7.34566	NaN	7.18558	7.2946	7.1416	7.18432	7.14553	7.34496	7.20549	7.19755	7.50413
COPS5	Q92905	CSN5	COP9 signalosome complex subunit 5	1.10682	-0.654613	No	1.65473	-0.230931	No	0.174954	-0.0946139	No	7.4158	6.85549	8.35378	8.01127	7.88628	8.30315	8.37643	8.24646	8.72635	8.1433	7.6741	7.22121	7.70056	8.03575	8.03174	8.13182	7.59495	7.585	8.00662	8.33969	8.16717	8.48735	7.69994	7.56478	6.63042	6.33133	7.91063	8.37498	7.83475	7.6022	7.39427	NaN	7.97504	7.84756
COPS6	Q7L5N1	CSN6	COP9 signalosome complex subunit 6	0.861164	0.171192	No	0.04974	0.0544099	No	0	-0.67908	No	6.39568	6.66679	6.44974	6.47227	6.39686	6.53467	6.52601	6.04215	6.32784	6.09471	6.86261	NaN	6.42079	6.55588	6.35119	5.29316	6.07714	NaN	6.15919	6.42016	NaN	6.25831	NaN	6.26865	NaN	NaN	NaN	6.84601	NaN	6.94773	6.64315	NaN	NaN	NaN
COPS7A	Q9UBW8	CSN7A	COP9 signalosome complex subunit 7a	1.53952	-0.517867	No	0.127225	-0.0471789	No	0.86285	0.442607	No	7.64285	8.06245	8.27991	7.30638	7.26649	7.91472	8.95805	8.68041	7.45366	8.14059	7.7325	8.11437	7.78465	8.6793	8.27516	7.8132	8.17847	NaN	7.66819	8.38616	8.55173	7.73616	8.98416	8.75582	8.11222	8.56515	9.33935	8.0102	8.85986	8.33259	7.70751	7.40621	8.29128	8.5138
COPS8	Q99627	CSN8	COP9 signalosome complex subunit 8	1.97026	-0.509279	No	0.145264	-0.148713	No	0	-0.0676684	No	6.52882	6.87132	6.56093	5.75492	6.63229	7.11463	7.25922	6.90979	6.67277	6.93825	7.03832	NaN	NaN	5.6434	6.54255	6.42182	NaN	NaN	6.72587	6.49455	6.42496	6.1344	6.24051	6.18604	NaN	NaN	NaN	NaN	6.30818	NaN	NaN	NaN	NaN	NaN
CORO1A	P31146	COR1A	Coronin-1A	1.35441	-0.280357	No	1.87199	-0.161469	No	0.00942168	0.00421365	No	10.5052	10.9835	10.906	10.5301	10.7643	11.0134	11.3336	10.8624	10.9357	10.9457	10.1904	9.81878	10.6918	11.0877	10.5636	10.5224	10.4335	9.90278	10.7251	11.1785	10.7846	10.819	10.3993	10.0419	9.7434	10.012	10.4035	10.3002	10.2688	10.2725	10.3339	9.62835	10.3876	9.98374
CORO1B	Q9BR76	COR1B	Coronin-1B	0.0262522	-0.0679289	No	0.324322	-0.202688	No	0.232396	0.106179	No	7.5679	4.74042	7.63811	6.35435	7.10807	4.82624	7.47746	7.73512	6.58786	7.12182	6.93449	6.59966	6.93075	7.13964	6.39765	7.85712	7.54736	NaN	7.42332	7.36389	6.87374	7.06477	6.67741	7.02815	NaN	6.3001	6.15261	6.48262	6.83127	7.24894	7.47638	NaN	5.65785	6.17802
CORO1C	Q9ULV4	COR1C	Coronin-1C	0.18684	0.0492217	No	0.224448	0.0824413	No	0.141654	0.104368	No	7.95813	8.66869	8.33759	8.7098	8.48703	8.27865	8.56682	8.11074	8.48648	8.47246	8.58568	7.07336	7.47532	8.56925	8.14179	8.59046	8.13498	6.96505	7.96858	8.64902	8.09406	8.12951	7.88024	7.28415	7.11217	NaN	6.77557	6.50166	7.18915	6.45915	7.60838	6.865	6.93357	6.8417
CORO2B	Q9UQ03	COR2B	Coronin-2B	1.60088	-1.01989	No	1.01961	-0.29327	No	1.16829	-0.498049	No	5.39996	6.07323	5.27604	5.59996	6.1573	6.91535	6.26161	7.08851	6.52622	6.81424	5.29341	5.16296	6.05375	6.18005	6.15323	6.48541	5.8063	4.88053	6.18752	6.92515	6.51305	6.77587	5.95904	5.74876	NaN	NaN	5.18223	NaN	6.67713	6.27767	NaN	5.9408	5.42939	NaN
CORO7	P57737	CORO7	Coronin-7	0	NaN	No	0.272037	-0.677646	No	NaN	0	No	5.38175	NaN	NaN	NaN	NaN	NaN	2.70799	NaN	NaN	NaN	3.40497	NaN	4.39828	NaN	NaN	4.7096	4.83804	NaN	NaN	NaN	NaN	4.63182	NaN	NaN	NaN	NaN	NaN	NaN	NaN	NaN	NaN	NaN	NaN	NaN
COTL1	Q14019	COTL1	Coactosin-like protein	1.15326	-0.322232	No	0.340532	-0.143684	No	0.133748	-0.11894	No	6.60767	5.41352	7.00994	6.27983	6.33351	6.8542	6.12968	6.92166	6.57204	6.77806	6.3336	6.15807	6.4306	5.816	5.6872	6.36261	6.73907	5.7548	6.15589	6.13568	6.4404	6.42433	6.13721	5.87926	NaN	NaN	6.0148	6.38823	6.49205	6.77312	6.46319	NaN	5.80566	5.82442
COX4I1	P13073	COX41	Cytochrome c oxidase subunit 4 isoform 1, mitochondrial	2.50245	-0.329682	No	0.619101	-0.114885	No	0.164231	-0.0564781	No	8.39294	8.66724	9.52303	9.18957	8.95785	8.72258	9.0689	9.68262	9.65471	9.25023	7.98516	7.81758	8.84748	8.85015	9.11594	9.56376	8.1289	8.13198	8.67627	8.84195	9.50728	9.583	9.02	8.68258	8.47866	8.17465	8.71285	9.41967	9.10949	8.76955	9.05775	7.98183	8.84953	9.05913
COX5A	P20674	COX5A	Cytochrome c oxidase subunit 5A, mitochondrial	2.10119	-0.621657	No	0.72974	-0.142398	No	0.242719	-0.10903	No	9.99889	10.0992	10.461	9.96875	10.1362	10.3586	10.7908	10.9581	11.0487	10.6162	9.83445	9.70256	10.1566	9.80352	10.0935	10.231	10.0531	10.1385	9.90014	9.95398	10.1827	10.4477	10.2072	9.8234	9.71504	9.87919	9.26009	10.0172	10.4003	10.0252	10.3736	9.22897	9.58684	9.94145
COX5B	P10606	COX5B	Cytochrome c oxidase subunit 5B, mitochondrial	1.3414	-0.241757	No	1.32029	-0.163123	No	0.213479	-0.12174	No	9.02753	9.09332	9.70887	8.97522	9.41974	9.21004	9.49978	9.66742	9.39381	9.66241	8.35521	7.76343	8.64525	8.57103	9.39158	9.79248	8.44338	8.13416	8.71909	8.91576	9.40712	9.87822	9.54336	8.4023	8.58181	8.11168	8.78057	8.89818	9.69792	8.78688	9.38712	7.42245	9.2115	8.54246
COX6B1	P14854	CX6B1	Cytochrome c oxidase subunit 6B1	0.284115	0.264559	No	0.0865324	-0.0303627	No	0.104814	-0.0639814	No	7.79672	7.97051	8.11035	6.55273	8.70573	6.05521	8.00745	8.08627	6.91614	8.74818	7.19566	NaN	6.76803	7.12615	7.52749	7.6478	6.88393	NaN	7.17304	7.1673	7.37548	7.81718	7.18302	7.36778	6.1871	5.62974	6.97386	6.87204	7.65912	7.22062	6.05011	NaN	NaN	NaN
COX6C	P09669	COX6C	Cytochrome c oxidase subunit 6C	0.587841	-0.268081	No	1.01445	-0.281682	No	0.405229	-0.222095	No	10.7231	10.6896	10.6641	9.24949	10.5773	11.1039	10.7133	10.7186	10.2609	10.4472	10.0219	9.547	10.2676	9.3564	10.0469	10.7132	10.3858	9.91697	9.99205	10.1099	10.3863	10.8521	10.2573	9.48387	9.86627	10.2067	9.55679	10.535	10.4191	10.6015	10.3072	9.68804	9.97315	10.2495
COX7A2L	O14548	COX7R	Cytochrome c oxidase subunit 7A-related protein, mitochondrial	0.055031	-0.122424	No	0.546443	-0.337263	No	0	NaN	No	6.78917	NaN	6.7632	6.38863	7.0936	4.67488	5.21591	7.83468	7.31114	7.70359	NaN	5.34788	NaN	NaN	6.909	6.91956	6.2904	NaN	NaN	NaN	7.40766	7.09542	NaN	NaN	NaN	NaN	6.83809	NaN	7.00994	6.94827	6.04363	6.03691	NaN	NaN
CP	P00450	CERU	Ceruloplasmin	0.613225	-0.794659	No	0	0.649939	No	0	1.148	No	3.73784	NaN	4.94366	5.77024	5.17375	6.10917	5.27126	5.18162	5.66613	5.84719	4.56058	3.91902	NaN	6.2157	NaN	NaN	NaN	NaN	5.25875	5.56576	6.10579	5.14627	5.36435	6.07081	NaN	NaN	5.79925	NaN	4.21634	NaN	NaN	NaN	NaN	NaN
CPA4	Q9UI42	CBPA4	Carboxypeptidase A4	1.37289	1.56816	Yes	0.65587	2.18274	No	0.124615	0.47174	No	NaN	NaN	6.96597	7.41641	7.34085	6.06042	6.46364	5.55729	6.3294	5.13206	6.71874	8.02416	NaN	7.10217	NaN	NaN	NaN	5.05223	6.56467	5.70862	7.2371	6.03954	5.93069	7.9444	NaN	6.09799	7.64493	NaN	6.60067	6.33094	NaN	NaN	NaN	5.92496
CPE	P16870	CBPE	Carboxypeptidase E	0.823854	-0.13082	No	0.0238491	0.00798559	No	0.0108939	0.00347559	No	7.72438	8.91551	8.68671	8.54148	8.34017	7.85579	9.06491	8.87118	8.40963	8.66084	7.75719	8.12223	8.09647	8.47247	8.46617	8.1811	8.00423	7.89496	8.38324	8.06152	8.39333	8.31043	8.24415	8.50798	7.62293	6.7398	8.57162	7.51834	8.2889	8.03982	7.89508	6.76665	8.76304	7.43049
CPLX2	Q6PUV4	CPLX2	Complexin-2	1.10826	-0.422143	No	0.88716	-0.301265	No	0.173594	-0.124914	No	7.78372	8.40036	8.74234	8.20912	8.49022	8.7725	9.00982	8.75196	8.62942	8.57277	7.63302	6.54755	7.9314	8.00425	8.16798	8.47985	8.01748	7.60335	7.78976	8.14108	8.31576	8.70421	7.32412	7.59187	7.23939	7.1884	7.72344	7.82492	7.84717	7.66384	8.11704	7.3975	7.91385	6.70222
CPNE1	Q99829	CPNE1	Copine-1	0.0971489	0.104746	No	0.544829	-0.404536	No	0.157913	0.178753	No	5.34787	NaN	5.18586	6.40291	5.85881	5.5686	5.67735	5.0646	5.26099	6.48227	6.05819	NaN	NaN	5.63736	5.1475	5.81068	NaN	NaN	5.37384	5.8433	6.10455	5.8613	5.81211	6.28287	NaN	NaN	6.22568	4.75117	5.07074	5.43486	4.67573	NaN	6.14559	5.70561
CPNE3	O75131	CPNE3	Copine-3	0.30714	0.208586	No	0.246645	-0.607964	No	0.278089	0.555585	No	NaN	NaN	6.75503	7.31255	8.083	5.39034	5.95667	7.01089	6.70785	7.80608	6.82371	7.41485	5.64522	7.11185	5.70436	6.42812	NaN	NaN	8.53392	6.14316	7.1507	5.49362	6.60091	7.94154	NaN	4.93042	7.25418	5.39905	6.75672	6.29525	5.76616	NaN	5.22818	6.69319
CPNE4	Q96A23	CPNE4	Copine-4	0.829172	1.53042	No	0	0.446104	No	NaN	0	No	5.5821	NaN	NaN	4.21961	6.28952	3.68885	4.59336	4.54299	NaN	5.12193	4.60904	NaN	NaN	NaN	NaN	5.7762	NaN	NaN	5.97192	NaN	4.69372	5.3301	NaN	NaN	NaN	NaN	NaN	NaN	NaN	NaN	NaN	NaN	NaN	NaN
CPNE6	O95741	CPNE6	Copine-6	1.2762	-0.492791	No	0.662334	0.108184	No	0.053405	-0.0207444	No	7.37763	6.95235	7.68618	7.62115	7.61081	7.92107	8.08597	7.9905	8.06348	7.65106	7.70876	6.65234	7.2911	7.62723	7.64709	7.98324	7.63425	6.19441	7.21749	7.66398	7.71118	7.83934	7.45969	7.44205	6.31825	7.09037	7.24326	7.48907	7.0363	7.4347	6.54547	7.54362	7.41406	7.19301
CPNE7	Q9UBL6	CPNE7	Copine-7	0.0410486	0.0806946	No	0.0654566	-0.0518122	No	0	-1.98565	No	5.26339	NaN	4.71616	4.89886	6.50007	5.56812	5.64743	3.88535	6.48016	5.12208	NaN	NaN	NaN	6.07365	5.55236	5.53585	1.91222	NaN	5.47591	5.61468	5.93703	5.76559	3.60016	NaN	NaN	NaN	NaN	NaN	5.58582	NaN	NaN	NaN	5.6083	NaN
CPNE8	Q86YQ8	CPNE8	Copine-8	0.352234	-0.470573	No	0	NaN	No	NaN	0	No	NaN	NaN	5.25317	NaN	5.00982	NaN	NaN	5.32895	NaN	5.87519	NaN	NaN	NaN	3.12681	NaN	NaN	NaN	NaN	NaN	NaN	NaN	NaN	NaN	NaN	NaN	NaN	NaN	NaN	NaN	NaN	NaN	NaN	NaN	NaN
CPQ	Q9Y646	CBPQ	Carboxypeptidase Q	0.277539	-0.325166	No	0	NaN	No	0	-0.93996	No	5.84721	NaN	5.65027	3.05289	5.00567	6.46723	4.71254	5.12982	3.92881	NaN	5.24222	NaN	5.3929	NaN	NaN	5.13723	NaN	NaN	NaN	3.90974	5.12711	NaN	NaN	4.55971	5.78714	6.07802	NaN	NaN	NaN	5.49967	NaN	NaN	NaN	NaN
CPS1	P31327	CPSM	Carbamoyl-phosphate synthase	0.0529269	0.0831355	No	0.290766	0.852091	No	0	0.0998597	No	5.36989	4.3902	NaN	NaN	NaN	5.74304	3.85079	2.33647	NaN	NaN	6.07817	4.47559	NaN	4.22773	NaN	3.56362	4.34136	NaN	NaN	NaN	2.73582	3.59625	4.82816	NaN	NaN	5.88812	NaN	NaN	4.7283	NaN	NaN	NaN	NaN	NaN
CPSF6	Q16630	CPSF6	Cleavage and polyadenylation specificity factor subunit 6	0.588405	0.313278	No	1.71093	0.570917	No	1.47556	0.956632	Yes	7.05386	6.3176	7.13867	6.5022	6.87016	6.56277	6.30664	5.98006	6.6777	6.78892	6.84674	6.78733	6.32235	7.05202	6.57482	6.73091	6.00398	NaN	5.94281	6.71121	NaN	6.01035	6.19942	7.0624	6.54629	7.34012	7.04441	6.04858	5.31172	6.01342	4.97946	NaN	NaN	5.72557
CPSF7	Q8N684	CPSF7	Cleavage and polyadenylation specificity factor subunit 7	0	0.73268	No	1.46893	1.55832	Yes	0	NaN	No	7.11059	4.65333	5.72404	6.8198	6.94542	NaN	NaN	NaN	6.08712	NaN	7.34858	NaN	7.19138	6.86601	NaN	6.93939	5.45864	NaN	NaN	5.05138	4.50128	5.969	6.44241	6.58044	NaN	NaN	NaN	5.87345	NaN	NaN	4.21489	NaN	NaN	NaN
CPT1A	P50416	CPT1A	Carnitine O-palmitoyltransferase 1, liver isoform	0	1.60834	No	0	0.467551	No	0	-0.849649	No	6.91202	NaN	NaN	NaN	NaN	5.30368	NaN	NaN	NaN	NaN	4.29453	NaN	6.37794	6.46309	NaN	NaN	NaN	NaN	NaN	5.99554	NaN	6.54879	6.01551	NaN	NaN	NaN	NaN	NaN	6.86516	NaN	NaN	NaN	NaN	NaN
CRACDL	Q6NV74	CRCDL	CRACD-like protein	0.257828	-0.174828	No	0.0290598	-0.0209304	No	0.189833	0.3348	No	6.18424	5.81975	7.12401	6.99537	6.51917	6.19458	7.04382	6.826	7.06263	6.38966	6.44664	6.01946	6.26921	6.20753	6.81095	6.86947	6.84669	5.6403	6.3488	7.214	6.29732	6.40172	NaN	5.73519	NaN	NaN	6.54418	7.0063	5.39401	6.12577	6.21128	5.87969	6.72885	5.42666
CRAT	P43155	CACP	Carnitine O-acetyltransferase	0.0581039	-0.04844	No	0.401627	-0.158974	No	0.143271	0.114628	No	7.90106	7.95515	7.65005	7.35458	7.50728	6.81722	8.14831	8.13688	7.5833	7.92461	6.69593	6.46252	7.52542	7.13902	7.11783	7.93612	7.28467	6.69814	7.48215	6.65945	7.75042	7.95585	7.85447	6.9265	6.43997	7.28648	6.60524	5.86437	7.13354	7.12234	7.01883	6.08201	6.4206	6.51194
CRELD1	Q96HD1	CREL1	Protein disulfide isomerase CRELD1	0.31826	-0.214168	No	0.559911	0.564294	No	0	1.79219	No	5.38431	5.01603	6.73596	5.88137	6.16396	NaN	5.62552	6.48984	6.16051	NaN	NaN	NaN	6.73362	NaN	5.61495	6.67463	5.49588	NaN	5.45718	5.35116	5.63455	6.23859	NaN	6.33708	NaN	5.61292	NaN	NaN	4.91031	4.54489	6.16136	NaN	NaN	NaN
CRHBP	P24387	CRHBP	Corticotropin-releasing factor-binding protein	0	0.081337	No	0	0.434197	No	0	NaN	No	NaN	NaN	5.98017	NaN	5.43025	NaN	4.57576	5.89883	6.84289	NaN	6.07792	NaN	NaN	6.27522	NaN	NaN	NaN	NaN	6.18936	5.84102	NaN	NaN	NaN	5.39896	NaN	NaN	NaN	NaN	5.79885	NaN	NaN	NaN	NaN	6.50736
CRIP2	P52943	CRIP2	Cysteine-rich protein 2	0.34847	-0.196559	No	0.629593	-0.44489	No	0	-1.19599	No	NaN	8.84864	8.61998	8.40756	9.25319	NaN	8.98987	8.85837	9.16198	8.90538	7.53025	NaN	7.85237	8.67395	8.15968	9.08082	NaN	NaN	9.00503	9.27809	7.87323	9.39002	6.43317	7.67999	NaN	NaN	NaN	6.52468	7.62917	NaN	7.26306	NaN	NaN	NaN
CRK	P46108	CRK	Adapter molecule crk	1.61668	-0.339268	No	0.0705326	-0.0166787	No	0.422647	0.212065	No	6.92602	7.32531	7.40509	7.24846	7.13216	7.05517	7.65346	7.71513	7.94531	7.36431	7.13233	NaN	7.32478	7.73421	7.28757	7.48908	6.8417	6.38291	7.4808	7.86576	7.39594	7.46717	7.32762	7.01978	6.92925	6.31238	7.22237	6.02654	7.1381	7.0514	7.13721	5.28576	7.1386	NaN
CRKL	P46109	CRKL	Crk-like protein	0.186079	-0.256168	No	0.595762	-0.183453	No	0.705632	-0.28391	No	7.66896	6.18282	7.7327	7.65165	7.84617	6.41484	8.18429	7.86704	8.14908	7.7479	7.41084	NaN	7.48742	7.93141	7.48348	8.04048	7.24655	NaN	7.82012	8.21364	8.04949	7.94109	7.94363	7.27597	6.19461	6.66724	7.62652	6.95731	7.8783	7.98414	7.02675	7.20462	7.61574	6.65919
CRMP1	Q14194	DPYL1	Dihydropyrimidinase-related protein 1	1.7933	-0.282374	No	1.30168	-0.244539	No	1.09804	-0.228465	No	12.2147	12.7857	12.7783	12.4596	12.6807	12.6013	13.1083	12.8819	12.9242	12.8152	11.848	11.2177	12.2157	12.4875	12.3319	12.6497	12.381	11.733	12.2086	12.6714	12.3601	12.8636	12.1679	11.8591	11.9169	11.2726	11.9391	12.3864	12.4089	12.145	12.4239	11.4837	12.3097	12.1415
CRNN	Q9UBG3	CRNN	Cornulin	0.12838	-0.262803	No	0.300001	-0.939612	No	0.993979	1.25463	No	5.44356	4.51988	5.49441	7.90398	5.84041	5.29779	6.96621	4.75304	6.19327	7.30594	8.09023	6.01394	6.94051	5.8164	6.8195	5.31434	4.96369	NaN	11.7441	6.05647	8.12347	6.79132	6.69848	8.4096	6.27911	NaN	8.38806	NaN	6.40935	7.01585	5.65106	NaN	5.68045	6.73106
CRYAB	P02511	CRYAB	Alpha-crystallin B chain	0.0584862	-0.0196752	No	1.3902	-0.311576	No	0.20368	-0.0691932	No	6.52429	6.53948	7.4463	6.70316	7.18081	6.84697	6.70666	7.5553	6.49671	6.88676	6.64241	6.49538	7.00731	6.02076	6.64156	6.83704	7.04189	7.157	7.19782	6.59349	6.60359	6.92013	6.96123	7.69632	6.65694	6.78025	6.42203	6.59914	7.1295	8.11229	6.66056	6.26652	6.72977	6.63244
CRYBG1	Q9Y4K1	CRBG1	Beta/gamma crystallin domain-containing protein 1	0	NaN	No	0	NaN	No	0	NaN	No	NaN	NaN	NaN	NaN	NaN	NaN	NaN	NaN	NaN	5.88509	NaN	NaN	NaN	NaN	NaN	NaN	NaN	NaN	6.07111	NaN	5.02723	NaN	NaN	5.8978	NaN	NaN	NaN	NaN	NaN	NaN	NaN	NaN	NaN	NaN
CRYL1	Q9Y2S2	CRYL1	Lambda-crystallin homolog	0.128981	-0.254915	No	0	NaN	No	0.69059	-0.717291	No	NaN	4.02478	6.16743	NaN	4.1641	NaN	5.61191	5.53764	5.43829	3.97152	NaN	NaN	NaN	NaN	NaN	NaN	NaN	NaN	4.80399	NaN	NaN	NaN	NaN	5.59431	NaN	NaN	NaN	5.54782	5.97161	6.54952	NaN	NaN	NaN	6.02718
CRYM	Q14894	CRYM	Ketimine reductase mu-crystallin	1.50436	-0.322531	No	0.120734	-0.0384628	No	0.151813	-0.0484982	No	8.34073	9.44483	9.69937	9.20149	9.51384	8.73541	10.0414	9.91547	9.59943	9.52117	8.63777	9.09128	8.69339	9.23142	8.41374	8.66547	9.11973	9.00429	8.36638	9.40155	8.25269	8.81919	8.59916	8.16267	7.97871	8.59589	8.87765	7.27184	8.56807	8.1173	8.50143	8.82227	8.5246	7.24324
CRYZ	Q08257	QOR	Quinone oxidoreductase	2.3152	-0.493296	No	0.0428347	-0.00800292	No	0.274604	-0.0863404	No	8.92424	9.23783	9.49253	8.62789	9.00071	9.55409	9.89217	9.88721	9.21975	9.19645	8.18805	9.00823	9.16295	8.91348	9.1686	8.92288	8.26294	9.03743	8.98286	8.87326	9.06209	9.19363	9.22515	9.04023	8.47548	8.29694	8.94092	9.38029	9.13955	9.23345	9.00206	8.51138	9.01789	8.97274
CS	O75390	CISY	Citrate synthase, mitochondrial	2.59415	-0.378347	No	0.896967	-0.181566	No	1.10122	-0.243854	No	10.293	10.5653	10.8875	10.3293	10.4824	10.7547	10.9496	11.1072	10.8622	10.7755	9.63779	9.69527	10.318	10.5168	10.8883	10.6678	10.1816	9.62226	10.6466	10.6853	10.7936	10.884	10.2654	10.3993	9.73206	9.52194	9.81216	10.5586	10.5059	10.5962	10.2652	9.8282	10.2471	10.3099
CSDE1	O75534	CSDE1	Cold shock domain-containing protein E1	0.73647	-0.138152	No	0.025694	0.00692614	No	0.141875	-0.0769707	No	8.18931	7.84135	7.80291	7.74608	7.87915	8.2213	8.30708	7.95488	7.79389	7.87241	8.01007	7.62865	7.93356	7.80214	7.91296	8.04306	7.74138	7.52594	8.00764	8.08272	7.69585	8.23536	7.73479	7.48767	7.36545	7.51022	7.83176	7.76116	7.60625	8.04836	8.15801	7.13307	7.40732	7.79987
CSE1L	P55060	XPO2	Exportin-2	0.851276	0.367497	No	0.15843	-0.089432	No	0.153266	-0.195001	No	9.25313	9.39835	9.21735	8.56173	8.38089	9.52202	8.93723	8.25374	8.09065	8.17033	8.19114	NaN	8.77863	8.76219	9.03867	9.3133	8.82159	9.18709	8.45892	9.15601	8.5579	9.53668	9.42856	8.33353	7.50039	9.28243	8.41198	9.45235	8.83229	9.15092	9.64498	8.66642	8.84097	8.44367
CSNK1D	P48730	KC1D	Casein kinase I isoform delta	0.742082	0.452242	No	0.400258	0.20177	No	0.182315	0.158966	No	8.73555	7.50986	8.38505	7.91898	7.91289	7.525	7.93346	7.51516	7.64874	7.57876	7.39128	7.71825	7.97325	8.75378	7.77925	8.44681	7.96849	7.73239	7.12542	8.05164	7.87431	8.09976	7.6623	7.19385	7.93713	NaN	8.11571	8.24535	7.00739	7.75493	7.18187	6.97787	8.32893	NaN
CSNK1E	P49674	KC1E	Casein kinase I isoform epsilon	2.75171	0.699893	Yes	2.03975	0.709657	Yes	0.897052	0.550682	No	7.6817	7.49847	7.0796	6.63647	6.99832	6.73437	7.11433	6.28017	6.01212	6.2541	6.85982	7.41193	7.02353	7.70805	7.37538	7.77192	6.44704	NaN	6.45028	6.90893	6.86594	6.51823	7.10597	6.93151	NaN	NaN	7.4953	7.42945	6.14649	6.88098	6.17016	NaN	7.34891	6.38313
CSNK1G3	Q9Y6M4	KC1G3	Casein kinase I isoform gamma-3	0.226344	0.247628	No	0.181675	0.107724	No	0	0.393121	No	NaN	NaN	6.59815	6.58096	5.44469	6.39424	NaN	6.28029	5.68886	5.91177	8.06441	6.11307	6.27668	5.96972	5.61863	6.73765	NaN	6.42893	5.98797	6.15298	NaN	6.09634	NaN	6.23792	5.95917	NaN	NaN	6.39287	6.25375	5.8448	NaN	6.23727	6.67402	NaN
CSNK2A1	P68400	CSK21	Casein kinase II subunit alpha	1.94779	0.536205	No	1.91059	0.533369	No	0.00571306	-0.00424759	No	7.14353	7.38867	6.80504	7.19403	6.96787	6.71295	6.45657	6.22392	7.00537	6.41933	6.04885	6.28298	6.75595	7.5918	7.03496	7.27894	5.86143	NaN	6.44001	6.92851	6.39617	6.41754	6.4981	6.19059	6.39785	5.47857	6.32065	5.51486	6.35757	5.56572	5.65141	5.77997	6.98668	6.08476
CSRP1	P21291	CSRP1	Cysteine and glycine-rich protein 1	0.341211	-0.183977	No	0.0309179	0.0184922	No	0.290225	0.177833	No	9.23525	7.4997	8.79863	7.36571	8.47553	8.5659	8.10745	9.05239	7.63556	8.93341	8.10185	7.07755	7.67291	8.332	7.10789	8.75384	7.91058	NaN	8.25717	7.68315	7.16408	8.86104	8.56584	8.66935	7.09662	8.38635	6.59808	7.0585	8.58079	8.67945	6.9461	6.9839	6.77643	7.34107
CST1	P01037	CYTN	Cystatin-SN	0.807531	0.828611	No	0	-0.708901	No	0	1.70559	No	NaN	NaN	4.58197	4.46087	5.01585	NaN	4.11952	NaN	3.42537	4.39412	NaN	4.52203	NaN	5.57977	NaN	NaN	NaN	NaN	8.75586	6.28867	6.11906	4.57583	NaN	6.60205	NaN	NaN	5.66024	NaN	5.52633	4.89646	NaN	NaN	NaN	NaN
CST2	P09228	CYTT	Cystatin-SA	NaN	0	No	0	NaN	No	0	NaN	No	NaN	NaN	NaN	NaN	NaN	NaN	NaN	NaN	NaN	NaN	NaN	NaN	NaN	NaN	NaN	NaN	NaN	NaN	7.92739	NaN	6.10448	NaN	NaN	5.34845	NaN	NaN	NaN	NaN	NaN	NaN	NaN	NaN	NaN	NaN
CST3	P01034	CYTC	Cystatin-C	0.485372	-0.369882	No	0.0653728	0.0689546	No	0.0371343	0.0213168	No	8.04275	8.33334	9.17301	9.61876	8.91352	9.42974	8.92958	9.06609	9.06158	9.44378	9.37559	9.17783	8.4584	9.9982	8.79997	8.8374	8.65513	7.80504	9.74578	10.0841	9.13525	8.80837	8.6487	8.79982	9.19091	9.3755	9.14702	8.86206	8.58373	9.599	8.68324	9.60949	8.99196	8.42868
CST4	P01036	CYTS	Cystatin-S	0.49171	-1.01449	No	0.0575172	-0.222323	No	0.100432	0.49955	No	NaN	2.75591	3.5252	6.54659	5.45991	3.82617	5.24707	6.03515	6.12103	4.94232	6.78964	6.89586	NaN	6.22715	NaN	4.6874	NaN	NaN	9.71731	5.32293	7.10196	6.03627	6.21991	7.96046	NaN	NaN	7.52642	NaN	7.20634	5.97494	NaN	NaN	NaN	5.87525
CST5	P28325	CYTD	Cystatin-D	NaN	0	No	0	NaN	No	0	NaN	No	NaN	NaN	NaN	NaN	NaN	NaN	NaN	NaN	NaN	NaN	NaN	NaN	NaN	NaN	NaN	NaN	NaN	NaN	7.81997	NaN	6.18411	NaN	NaN	6.83841	NaN	NaN	5.08381	NaN	6.34291	NaN	NaN	NaN	NaN	NaN
CST6	Q15828	CYTM	Cystatin-M	0.0783185	0.110913	No	0	0.281101	No	0	1.42309	No	NaN	NaN	6.96187	7.87698	8.3061	5.9404	NaN	6.82515	6.96733	9.01972	7.80912	8.32387	NaN	6.83859	NaN	NaN	NaN	NaN	7.68385	6.55749	7.20047	6.07989	NaN	8.07847	NaN	7.18999	7.91213	NaN	7.53102	6.65538	NaN	NaN	NaN	7.20675
CSTA	P01040	CYTA	Cystatin-A	0.671455	-1.30946	No	0.0321389	0.0813711	No	0.532199	0.729639	No	8.55876	10.1597	11.4172	11.9115	10.9984	12.5474	10.8685	11.4464	11.0656	13.665	11.6069	12.8859	9.99532	10.929	10.38	10.2331	9.44315	9.81209	12.1626	11.0808	12.1697	10.8737	11.7196	12.9945	11.1167	11.9554	12.2078	10.1128	11.8866	11.9107	9.00951	10.5575	10.3319	12.0327
CSTB	P04080	CYTB	Cystatin-B	0.468682	-0.310702	No	0.324001	-0.778341	No	0.360211	0.305016	No	5.71501	6.3994	6.21087	7.10614	6.78831	6.94626	6.23759	6.72747	6.68966	7.17225	6.98662	6.75037	6.17248	6.34244	5.75193	6.25191	5.88305	5.09555	11.0724	5.92088	8.10009	6.85388	6.73145	8.20593	6.30619	5.69372	7.36409	5.78589	7.01185	7.51558	5.60657	5.39868	5.87889	6.84559
CTBP1	Q13363	CTBP1	C-terminal-binding protein 1	2.46794	-0.543408	No	0.537098	-0.168115	No	0.535932	-0.191777	No	7.82186	8.00274	7.73439	7.66933	7.62468	8.27298	8.79918	8.43452	8.1052	7.95816	7.49828	7.49029	7.57375	8.15674	7.65037	7.51757	7.90443	7.65842	7.45713	7.78488	8.16394	7.92689	7.48805	7.25971	7.06105	6.80623	7.88619	7.58568	7.41419	7.53223	7.45436	7.51233	7.44548	7.87898
CTBP2	P56545	CTBP2	C-terminal-binding protein 2	0.0623167	-0.172082	No	0	0.000326633	No	0	-2.07311	No	5.44706	NaN	5.5036	NaN	3.03942	3.93922	4.93764	5.9456	4.32434	4.6215	3.88768	NaN	NaN	NaN	NaN	4.97226	NaN	NaN	4.56151	4.00761	4.52006	4.97193	NaN	5.33286	NaN	NaN	4.62645	NaN	NaN	NaN	NaN	NaN	6.69956	NaN
CTNNA1	P35221	CTNA1	Catenin alpha-1	0.630584	0.963576	No	1.09451	-0.435196	No	0.235034	-0.881363	No	9.35741	8.7536	9.33389	7.41567	7.08389	6.7144	8.41784	6.83426	7.22034	7.93974	NaN	7.26443	8.56702	6.78043	6.19301	5.9209	NaN	7.67788	8.84973	6.67678	7.24039	6.45699	NaN	6.52649	NaN	NaN	8.67223	NaN	6.87723	8.55171	NaN	NaN	8.40973	7.44542
CTNNA2	P26232	CTNA2	Catenin alpha-2	1.85194	-0.340005	No	1.04968	-0.278573	No	1.36805	-0.317324	No	8.66233	9.38953	9.11044	8.67492	8.7572	9.31422	9.5925	9.43207	8.88921	9.06644	8.20111	8.31603	8.64972	8.97681	9.1692	9.15398	9.01427	8.55974	8.86975	9.26041	8.96445	9.46967	8.73816	8.90489	8.11738	8.22233	8.79523	8.89578	9.26128	9.35687	8.77892	8.15006	9.10729	8.9233
CTNNB1	P35222	CTNB1	Catenin beta-1	2.76174	-0.504411	No	1.50053	-0.472463	No	1.22554	-0.385365	No	7.67814	7.70424	7.89807	7.65813	7.70629	8.23204	8.37624	8.15677	8.16519	8.23669	6.91382	6.42841	7.42431	7.595	7.79608	8.00511	7.79663	6.39827	8.39467	8.0662	7.98098	8.36077	7.58354	7.69156	6.63281	6.61055	7.40277	7.44712	8.00338	7.95381	7.74188	6.90806	7.68468	7.38873
CTNND1	O60716	CTND1	Catenin delta-1	1.75739	-2.01563	No	0	NaN	No	0	NaN	No	NaN	NaN	4.03197	5.00819	2.94645	NaN	NaN	6.10296	NaN	4.90671	NaN	NaN	NaN	4.74237	NaN	NaN	NaN	NaN	6.28889	NaN	5.28925	4.60805	NaN	NaN	NaN	NaN	NaN	NaN	5.42053	NaN	NaN	NaN	NaN	NaN
CTNND2	Q9UQB3	CTND2	Catenin delta-2	0.354954	-0.131656	No	0.990882	-0.187763	No	1.13188	-0.406023	No	7.24395	7.53806	7.91541	7.07996	7.90888	6.96647	8.01512	7.84048	7.5816	7.94087	6.90417	6.15404	7.44832	7.39708	7.4117	8.16765	7.16259	6.48377	7.4312	7.59565	7.90433	8.032	6.73564	7.20023	6.18117	NaN	7.74261	7.90302	7.47697	7.70868	6.81931	6.39189	8.10355	7.68427
CTPS1	P17812	PYRG1	CTP synthase 1	0.608435	-0.488641	No	0.9637	-0.494177	No	0	NaN	No	NaN	NaN	6.53102	6.39802	7.25397	6.12643	5.94591	6.9772	7.42854	7.24319	NaN	NaN	6.65508	6.77436	6.48517	6.69761	NaN	NaN	NaN	7.45534	7.14795	6.83639	NaN	6.42912	NaN	NaN	NaN	NaN	6.713	NaN	5.58498	NaN	NaN	NaN
CTSB	P07858	CATB	Cathepsin B	0.0942296	0.0445322	No	0.274489	0.256678	No	0.767868	0.356201	No	8.25584	8.48409	9.54725	7.8758	8.7793	8.08254	8.90055	8.94195	7.95488	8.83971	9.58256	8.21042	8.79128	8.23945	8.25286	8.55459	7.94527	NaN	9.30684	8.02456	8.55443	8.30625	8.23229	8.70138	7.74948	8.34424	8.57413	8.29804	8.31796	8.55997	7.88494	7.10649	7.77435	8.11865
CTSC	P53634	CATC	Dipeptidyl peptidase 1	NaN	0	No	0	NaN	No	NaN	0	No	NaN	NaN	NaN	NaN	NaN	NaN	NaN	NaN	NaN	NaN	5.13429	NaN	NaN	NaN	NaN	NaN	NaN	NaN	NaN	NaN	NaN	NaN	NaN	NaN	NaN	NaN	NaN	NaN	NaN	NaN	NaN	NaN	NaN	NaN
CTSD	P07339	CATD	Cathepsin D	0.200652	0.146823	No	1.20795	0.718444	No	1.42869	0.497859	No	9.00397	9.37048	9.7742	9.68124	9.22102	9.57137	9.1472	9.43862	8.62537	9.53424	10.4406	9.44774	8.87504	8.46648	9.11871	8.92615	8.47195	8.18666	8.57452	8.0557	8.90461	8.77064	9.37506	9.88216	8.84889	9.65136	9.44853	9.08069	9.33184	9.58024	8.64035	8.59565	8.42463	8.72683
CTSG	P08311	CATG	Cathepsin G	0.404957	-0.731091	No	0.11493	-0.399233	No	1.38245	2.32587	Yes	6.22384	6.44252	9.58201	9.03511	8.54153	8.5661	8.56083	8.38264	8.02806	9.94283	8.50041	9.04636	6.34688	10.1896	6.39512	7.06182	5.93077	NaN	8.93487	8.11274	10.2657	7.24594	9.01072	9.38844	8.76727	NaN	9.90607	NaN	7.87629	8.19636	5.50268	7.35859	6.19368	7.89516
CTSV	O60911	CATL2	Cathepsin L2	0.167029	0.428295	No	0.239	-0.244689	No	0	-0.67546	No	NaN	NaN	4.96998	8.16826	9.3033	8.5393	4.44093	6.12162	7.69293	7.3421	8.34626	8.23137	7.79909	7.79441	NaN	7.21313	NaN	NaN	8.78385	7.69708	8.09852	7.05977	7.45211	8.22371	NaN	NaN	7.71193	NaN	8.12757	NaN	NaN	NaN	NaN	NaN
CTTN	Q14247	SRC8	Src substrate cortactin	0.0236043	-0.0104648	No	0.574565	-0.274174	No	0.0926831	-0.0232805	No	7.0574	7.5419	8.03325	7.2391	7.67496	7.43572	7.76789	7.92423	6.75715	7.71396	7.20136	6.90296	6.98441	7.60509	7.05131	7.88515	7.03096	7.2913	8.23317	7.46965	7.41508	7.83517	7.01679	7.12558	6.6686	7.54982	7.39346	7.01781	7.03475	7.17547	6.52057	7.30055	7.46433	7.41606
CUL5	Q93034	CUL5	Cullin-5	1.27335	-0.761261	No	0.229102	-0.102507	No	0.0359926	-0.0471857	No	NaN	4.77339	5.56652	5.04344	4.99282	5.36532	6.23459	5.9731	5.78745	5.42609	5.22228	5.82894	5.35187	5.15741	5.76242	5.3089	5.78798	5.43153	5.64337	5.75361	5.55144	5.07893	5.81025	5.04579	NaN	NaN	4.20451	5.53575	4.63179	5.4329	4.54746	4.87172	5.05545	5.66491
CUTA	O60888	CUTA	Protein CutA	0.219502	-0.213995	No	0.0835415	0.0229616	No	0	NaN	No	9.67762	10.3538	10.323	NaN	NaN	NaN	10.8655	10.2393	10.3652	NaN	10.1909	NaN	NaN	10.4846	NaN	9.67783	10.2494	NaN	NaN	10.3802	NaN	NaN	10.4215	NaN	NaN	NaN	NaN	NaN	NaN	NaN	NaN	NaN	NaN	NaN
CXADR	P78310	CXAR	Coxsackievirus and adenovirus receptor	0.395964	0.345309	No	0.536394	-0.246736	No	0	NaN	No	7.08806	NaN	7.532	7.48602	7.71143	5.69559	7.6687	7.64805	7.54931	7.54332	NaN	NaN	6.68922	7.55393	7.28524	7.14856	7.86821	NaN	NaN	7.53254	7.47544	7.71995	NaN	NaN	NaN	NaN	6.88903	5.28449	7.08011	NaN	NaN	7.37935	NaN	NaN
CYB5R1	Q9UHQ9	NB5R1	NADH-cytochrome b5 reductase 1	0	-0.775338	No	0.109397	0.130381	No	0	-0.582345	No	NaN	NaN	5.30677	NaN	NaN	6.14109	5.49874	6.08211	5.03364	3.87917	NaN	NaN	5.75105	5.43645	NaN	4.16728	NaN	NaN	5.30414	4.82121	5.66208	4.8383	5.54741	5.39981	NaN	NaN	NaN	NaN	NaN	5.98215	NaN	NaN	NaN	NaN
CYB5R3	P00387	NB5R3	NADH-cytochrome b5 reductase 3	1.44016	-0.361438	No	0.113262	-0.0273579	No	0.589098	-0.152116	No	6.42614	6.7609	6.84185	6.97578	6.96811	7.07411	7.2324	7.16531	7.39485	6.91329	6.55719	6.3077	6.85785	6.48523	6.81031	6.91898	6.56793	6.09108	6.87612	6.75171	7.0969	6.71766	6.83539	7.14295	6.61219	5.93119	6.80607	7.44827	7.03572	7.27634	6.70245	6.6153	6.78289	7.27604
CYC1	P08574	CY1	Cytochrome c1, heme protein, mitochondrial	0.807669	-0.266062	No	0.358986	-0.110302	No	0.207316	0.185998	No	7.7316	8.02552	8.84916	8.78346	8.47076	7.61206	8.74662	9.35891	8.88369	8.58952	7.95045	7.33612	7.70993	8.4533	8.06245	7.98765	8.32411	7.54686	7.81533	8.2944	8.55056	7.63043	8.67877	8.22393	6.54232	7.97907	8.06053	7.94832	8.33856	7.93944	7.8156	6.81619	8.30119	7.10598
CYCS	P99999	CYC	Cytochrome c	3.18053	-0.557973	No	0.713389	0.219737	No	0.0206987	-0.00763011	No	7.72574	7.94865	8.90319	8.53101	8.54741	8.27179	8.63595	9.24656	9.14004	9.15153	8.46218	8.04633	7.73304	8.23839	8.27788	8.66512	7.70117	7.62283	7.71284	7.87308	8.46694	8.72766	8.3048	8.10936	7.65737	6.49545	8.34156	7.74772	8.55693	7.71911	7.94453	6.77318	8.06063	7.64767
CYFIP1	Q7L576	CYFP1	Cytoplasmic FMR1-interacting protein 1	1.25974	-0.329913	No	1.41189	-0.162367	No	0.36518	-0.0923381	No	10.8924	10.818	11.011	10.7189	10.9642	11.1425	11.3105	11.1374	11.4412	11.0223	10.5539	9.78773	10.7506	10.925	10.9068	11.0162	10.6911	10.1132	10.7573	11.1228	11.2171	11.0129	10.7345	10.5369	9.86066	9.9571	10.7788	10.9842	10.7064	10.6262	10.4031	10.0751	10.8817	10.7138
CYFIP2	Q96F07-2	CYFP2	Cytoplasmic FMR1-interacting protein 2	0.717662	-0.41948	No	0.0258459	-0.0127902	No	0.362895	-0.143864	No	8.85967	7.92464	9.23382	8.89407	9.05041	8.69478	9.34436	9.56852	9.25839	9.19396	8.3629	7.32859	8.67059	9.14283	8.73605	9.18367	8.46689	7.89843	8.67655	8.46803	8.93465	9.05684	8.76133	8.39925	7.60311	7.29607	8.27311	8.77871	8.42709	8.77368	8.24396	7.30606	8.74905	8.47491
CYRIB	Q9NUQ9	CYRIB	CYFIP-related Rac1 interactor B	1.75034	-0.367601	No	1.61507	-0.305068	No	0.90853	-0.399329	No	8.85595	9.46559	9.46546	9.0907	9.25829	9.1895	9.58085	9.72704	9.76855	9.70804	8.39906	7.76054	8.89339	9.44396	9.21355	9.34827	8.95669	8.33048	9.17748	9.6254	9.16611	9.63302	8.93353	8.57823	7.95785	8.26155	8.64212	8.42913	9.06027	8.92286	9.24975	8.03828	9.3285	8.59872
CYTH3	O43739	CYH3	Cytohesin-3	0.383072	-0.412833	No	0.0523147	-0.0438112	No	0.570487	-0.322025	No	6.05045	6.32752	6.88291	7.31028	7.24768	7.21316	7.43497	6.93666	8.26353	6.03469	NaN	NaN	NaN	7.90337	6.16956	7.34426	7.25521	NaN	7.31422	7.59692	6.74719	7.20451	6.00866	NaN	NaN	NaN	6.59239	NaN	6.47539	NaN	NaN	NaN	6.76971	NaN
D2HGDH	Q8N465	D2HDH	D-2-hydroxyglutarate dehydrogenase, mitochondrial	0.621518	-0.520301	No	0.451298	-0.564088	No	0	NaN	No	NaN	5.9613	5.59941	NaN	NaN	NaN	6.2765	6.32481	NaN	5.26651	NaN	NaN	6.30606	5.79918	6.23804	6.24013	NaN	NaN	NaN	NaN	6.45186	7.15448	NaN	NaN	NaN	NaN	NaN	6.73248	5.83662	6.33603	NaN	NaN	NaN	NaN
DAAM1	Q9Y4D1	DAAM1	Disheveled-associated activator of morphogenesis 1	0.3303	-0.314904	No	0.139848	0.160885	No	0	-0.321159	No	5.64281	4.09129	4.25533	5.77447	5.52548	NaN	5.3762	4.55272	5.2054	5.77188	NaN	NaN	5.83929	NaN	NaN	5.5055	5.13843	NaN	5.32987	5.37992	5.29831	5.69315	5.19185	4.96421	NaN	NaN	5.07365	4.37082	NaN	NaN	NaN	NaN	5.39481	NaN
DAB2IP	Q5VWQ8	DAB2P	Disabled homolog 2-interacting protein	1.08632	-0.770995	No	0.341538	0.111661	No	0.135614	0.116004	No	NaN	4.65106	5.02559	5.80012	6.70152	6.14084	6.06798	6.13101	6.26028	6.80302	NaN	NaN	NaN	6.67334	6.51469	6.46745	7.11599	NaN	5.63754	6.40873	6.3157	6.59606	5.93245	NaN	NaN	NaN	6.54225	6.66005	NaN	6.55849	NaN	NaN	6.6851	6.28519
DARS1	P14868	SYDC	Aspartate--tRNA ligase, cytoplasmic	0.927305	-0.161821	No	0.990044	0.164351	No	1.64655	0.25731	No	6.86236	6.64907	7.02096	6.72276	6.72264	6.78913	7.04516	7.15146	6.79723	7.00391	7.12364	6.31947	6.88646	7.01776	6.62625	6.98862	6.69085	NaN	6.70971	6.84874	6.54072	7.03096	6.88615	6.75285	6.17961	6.81711	6.85342	6.87321	6.60528	6.74323	6.08833	6.53585	6.53622	6.3096
DBI	P07108	ACBP	Acyl-CoA-binding protein	1.13423	-0.214929	No	0.932531	-0.133917	No	0.0804663	0.0547504	No	8.75628	8.85135	9.91997	9.06815	9.47553	8.90778	9.39201	10.0531	9.07942	9.71365	8.69731	8.80939	9.13939	8.12827	9.03075	9.27884	8.8535	8.8305	9.59216	8.22214	8.9816	9.40754	9.54747	9.27219	9.55581	8.68604	8.64446	9.1226	9.40179	9.68471	10.3197	7.78902	8.64522	8.65958
DBN1	Q16643-3	DREB	Drebrin	0.8322	-0.191302	No	1.14275	-0.186379	No	0.122487	-0.0846272	No	8.53808	9.13095	9.41108	9.15128	8.96949	8.84869	9.59889	9.34494	9.0992	9.26567	8.85695	8.4135	8.88155	9.22125	8.95738	9.4171	9.19459	8.65791	8.81334	9.68571	8.97325	9.54119	8.12154	8.53379	8.36988	9.10647	8.86759	9.29874	8.34702	9.05159	9.10054	8.28846	9.28038	8.7378
DBNL	Q9UJU6	DBNL	Drebrin-like protein	0.742918	-0.230176	No	1.7867	-0.27386	No	1.35703	-0.251906	No	7.82476	7.82265	8.26859	7.98397	8.52704	8.03484	8.5891	8.25875	8.17729	8.5179	7.84714	6.67155	7.72131	8.19834	8.00644	8.45295	7.87712	7.03881	8.24296	8.60151	8.22297	8.55752	7.84945	7.83037	7.60788	6.97897	7.90982	7.28249	7.79966	7.95313	7.85559	7.2873	8.14735	7.92738
DBT	P11182	ODB2	Lipoamide acyltransferase component of branched-chain alpha-keto acid dehydrogenase complex, mitochondrial	0.0777623	-0.31417	No	0	-0.139454	No	0	-0.202156	No	5.48342	2.21935	6.20164	6.48785	NaN	2.8551	6.28774	6.43039	6.07572	5.48498	NaN	NaN	NaN	5.97941	NaN	6.21465	NaN	NaN	NaN	NaN	NaN	6.35411	5.53073	5.23575	NaN	NaN	NaN	NaN	5.73288	NaN	NaN	NaN	NaN	NaN
DCC	P43146	DCC	Netrin receptor DCC	0.450816	-0.907456	No	0.0741459	-0.0862291	No	1.00949	-0.410318	No	NaN	NaN	5.97034	NaN	6.22794	NaN	6.27279	7.44205	6.98337	6.57114	NaN	NaN	6.97868	6.35057	7.19854	6.55322	NaN	6.13476	7.09602	7.26391	6.19827	6.86773	6.18474	6.18504	NaN	NaN	5.7812	6.61801	6.89164	6.29177	6.26818	6.41642	6.49273	6.73412
DCD	P81605	DCD	Dermcidin	0.490466	-0.567896	No	0.353284	0.548374	No	0.397416	0.538387	No	10.9882	11.5991	12.0424	12.7876	12.4623	13.1044	11.61	13.1258	11.9017	12.9772	12.7637	14.0593	10.9034	12.1059	11.1184	10.8836	10.4539	11.3973	11.1094	11.652	12.4747	11.4566	12.5242	13.174	12.0533	11.0031	13.5151	10.8042	12.5202	12.4254	10.1533	11.1104	11.2195	12.4148
DCD	P81605-2	DCD	Dermcidin	0.21468	-0.393913	No	0.498675	0.68644	No	0.168179	-0.328876	No	7.63573	8.25564	8.44423	9.77666	9.33748	10.5921	8.86811	8.41214	8.44736	9.09958	10.0028	11.0225	8.07066	8.60896	9.03371	7.32069	8.10967	7.86536	7.96486	9.38622	8.95967	7.65485	8.97355	9.60051	9.92132	7.35713	10.3943	7.58495	9.6582	8.88707	NaN	8.23188	8.62871	10.1489
DCLK1	O15075	DCLK1	Serine/threonine-protein kinase DCLK1	0.657968	-0.13611	No	0.871512	-0.129467	No	0.778175	-0.268824	No	7.68591	8.51831	7.67601	7.96569	7.70372	8.13858	8.48468	7.69432	8.21399	7.69863	7.91792	7.35727	7.56883	8.15175	7.91577	8.11714	8.23226	7.47844	7.49455	8.51042	7.87634	8.21347	7.37165	7.30615	7.51853	7.0534	7.57329	7.84802	7.67081	7.76009	7.4967	7.67237	8.22829	7.45573
DCLK2	Q8N568	DCLK2	Serine/threonine-protein kinase DCLK2	1.0046	-0.304308	No	0.51081	-0.182719	No	1.34854	-0.413737	No	8.54767	8.66338	8.90713	8.31367	8.47799	8.71166	9.25169	8.90346	9.01258	8.55201	7.99991	7.90097	8.76037	9.00718	8.34584	9.10831	8.46084	8.14101	8.22068	9.28178	8.92625	9.18834	8.02491	7.49546	7.54311	7.63569	8.57667	8.50048	8.36138	8.30753	8.1766	8.20536	8.99215	8.21573
DCTN1	Q14203	DCTN1	Dynactin subunit 1	1.38716	-0.279793	No	2.21667	-0.257837	No	0.983145	-0.311474	No	8.12369	8.28271	8.2927	8.27443	8.3496	8.09747	8.73148	8.76022	8.62471	8.50822	7.77448	7.55921	8.19951	8.35035	8.16559	8.23738	8.2099	7.90258	8.38044	8.3838	8.43293	8.52388	7.96213	8.08598	7.50799	7.583	7.73843	8.17904	8.37705	8.36993	8.49848	7.58927	8.0149	8.07578
DCTN2	Q13561	DCTN2	Dynactin subunit 2	0.322569	-0.065811	No	0.681566	-0.153207	No	0.331491	-0.167956	No	9.35625	9.806	9.76279	9.51306	9.72243	9.44269	10.057	9.6042	9.75397	9.63177	9.21964	7.98466	8.8562	9.3684	9.57106	9.50865	9.36676	8.61026	8.92831	9.4084	9.41822	9.6959	9.26692	9.02275	8.37707	8.48642	9.33772	9.1094	9.38317	9.21391	9.34424	8.28186	9.80718	8.57766
DCTN4	Q9UJW0	DCTN4	Dynactin subunit 4	0.076225	0.0459983	No	0.572098	-0.254923	No	0	-0.128958	No	6.51542	6.21148	6.96874	NaN	6.73369	6.04624	6.7111	6.99172	6.85975	6.49628	NaN	NaN	6.36375	7.08683	6.0024	6.05693	6.52123	NaN	6.54316	6.84711	6.61512	6.52421	NaN	6.4605	5.78773	NaN	NaN	5.48326	6.84669	6.58946	NaN	NaN	5.67572	NaN
DCTN6	O00399	DCTN6	Dynactin subunit 6	0.0620162	-0.193484	No	0.611914	-0.155909	No	0	1.13923	No	6.32488	NaN	5.2919	NaN	6.37481	NaN	5.57939	6.3975	7.04937	5.65617	6.8851	NaN	6.14588	6.64952	NaN	6.50924	NaN	NaN	6.36476	NaN	6.8835	6.60217	NaN	6.76182	NaN	NaN	NaN	NaN	NaN	5.62259	NaN	NaN	NaN	6.29637
DCXR	Q7Z4W1	DCXR	L-xylulose reductase	1.12456	-0.323259	No	0.0294242	-0.0120379	No	0.869942	0.258371	No	7.22615	7.51206	7.51885	6.83567	6.93257	7.74793	7.40548	7.90058	6.99741	7.59021	7.06438	7.18222	7.42188	7.2914	7.11303	7.03149	7.08786	6.70774	7.71131	7.1309	7.60184	6.93698	6.61722	7.4824	6.80694	6.99698	7.69119	7.23092	6.76704	7.15649	6.7504	6.53554	6.863	7.20294
DDAH1	O94760	DDAH1	N(G),N(G)-dimethylarginine dimethylaminohydrolase 1	0.429355	-0.105973	No	2.4335	-0.222023	No	0.820582	-0.361772	No	10.3525	10.8996	10.9231	10.581	10.5022	10.4576	11.2758	11.0004	10.8114	10.243	10.0082	9.61979	10.1355	10.2268	10.4539	10.4247	10.2746	10.0114	10.2912	10.4723	10.5358	10.6158	10.7085	9.66341	9.64095	9.87812	10.0911	10.4459	10.7623	10.64	10.5313	9.75593	10.6777	10.2314
DDAH2	O95865	DDAH2	N(G),N(G)-dimethylarginine dimethylaminohydrolase 2	0.0149207	0.0121933	No	0.153781	0.14022	No	0.669277	-0.226568	No	6.5736	5.66591	7.18292	7.30407	7.31546	6.08155	6.55351	7.02728	6.72555	7.59311	6.60424	6.68723	6.39987	7.20896	6.51416	7.30432	7.22054	5.19246	7.0806	6.69296	6.86958	6.82133	6.81134	7.84159	6.56079	5.12716	6.28506	6.52257	7.29508	7.44187	6.82567	5.52382	6.23189	7.1896
DDB1	Q16531	DDB1	DNA damage-binding protein 1	0.0130823	0.00859632	No	0.561707	0.072762	No	0.78728	0.285608	No	7.42922	7.14468	7.24486	6.42217	6.96824	6.81695	7.24545	7.07834	7.14557	6.87988	7.28293	7.02947	6.5496	6.90969	6.98135	6.80142	7.13294	6.74709	6.60298	6.84973	6.8631	6.92204	7.53563	6.96209	6.55758	7.88794	6.95745	6.88597	6.87191	6.91398	6.84262	7.01904	6.6077	6.81777
DDI2	Q5TDH0	DDI2	Protein DDI1 homolog 2	0.444037	0.322109	No	0.220367	-0.140113	No	0.177757	-0.244041	No	6.1887	5.65685	5.44173	6.32009	6.64526	4.66885	5.58275	5.631	6.42777	6.33173	6.33704	5.56492	5.62086	6.33695	6.29527	6.48382	6.07777	NaN	6.69467	6.54539	6.06015	6.39652	NaN	5.92024	NaN	NaN	6.52305	6.12538	5.96236	6.81666	NaN	NaN	7.06001	5.42412
DDOST	P39656	OST48	Dolichyl-diphosphooligosaccharide--protein glycosyltransferase 48 kDa subunit	0.654657	0.486307	No	2.51385	0.475621	No	1.44413	0.812862	Yes	7.62563	6.62761	6.41973	6.46918	5.70041	7.02984	6.13981	5.63654	5.16795	6.43689	6.97367	NaN	NaN	6.55394	NaN	5.59675	6.45432	5.74945	5.26342	6.07462	5.78394	5.16857	7.2079	6.75644	5.17961	6.11323	6.88757	5.78131	5.80251	5.48359	4.88933	NaN	5.89671	5.67637
DDTL	A6NHG4	DDTL	D-dopachrome decarboxylase-like protein	1.07433	-0.503835	No	0.0868052	-0.0268339	No	0.145046	0.105361	No	6.7535	6.48473	7.43568	6.87613	7.04468	6.72178	7.77796	8.01765	7.23304	7.36344	6.83197	6.49294	6.85769	6.6026	6.57016	6.57121	7.0802	6.40544	6.50027	6.71519	6.95279	6.4337	6.17762	6.9874	NaN	5.94597	NaN	NaN	6.50519	6.44348	6.38684	5.84623	5.20557	NaN
DDX1	Q92499	DDX1	ATP-dependent RNA helicase DDX1	1.62414	0.647686	Yes	1.6633	0.459367	No	2.1525	0.836166	Yes	8.09365	8.34798	8.35354	7.7662	8.13856	6.87428	7.74021	7.72157	7.69533	7.4301	7.82205	7.43509	8.07578	8.36098	7.9472	8.30295	NaN	6.55236	7.88483	8.04562	7.64191	7.70043	8.51674	7.93122	6.95822	7.3952	8.14792	7.84181	7.63032	7.10539	6.72334	NaN	7.12678	6.62926
DDX17	Q92841	DDX17	Probable ATP-dependent RNA helicase DDX17	2.39711	1.00699	Yes	1.63921	0.700068	Yes	2.15265	1.17395	Yes	7.73103	7.76902	8.38715	7.51956	8.36944	6.68862	6.96499	6.98667	7.04411	7.05688	7.88288	7.07033	7.58062	7.92003	7.55497	8.186	6.55037	NaN	7.39528	7.50441	6.75503	7.41906	8.2106	8.12735	6.92135	7.26229	8.9191	8.1988	6.95738	7.04171	6.61776	6.60432	6.79612	6.57849
DDX19A	Q9NUU7	DD19A	ATP-dependent RNA helicase DDX19A	0	NaN	No	0	NaN	No	0	NaN	No	NaN	3.96817	NaN	NaN	NaN	NaN	NaN	NaN	NaN	NaN	3.94849	NaN	NaN	6.09835	NaN	NaN	NaN	NaN	NaN	NaN	NaN	NaN	5.58783	NaN	NaN	5.46253	NaN	NaN	NaN	NaN	NaN	NaN	NaN	NaN
DDX21	Q9NR30	DDX21	Nucleolar RNA helicase 2	0	0.227604	No	0	0.715573	No	0	-0.465557	No	7.40073	NaN	6.1565	NaN	NaN	7.17312	NaN	NaN	NaN	6.9528	7.03158	NaN	NaN	7.17357	NaN	NaN	NaN	NaN	NaN	6.458	NaN	NaN	NaN	7.65559	NaN	6.89843	6.66771	NaN	7.07027	NaN	NaN	7.36399	NaN	NaN
DDX39B	Q13838	DX39B	Spliceosome RNA helicase DDX39B	2.12044	0.557812	No	1.42205	0.910202	Yes	2.875	1.09474	Yes	8.74938	8.3855	8.60465	8.36037	8.80348	8.47113	7.90316	7.7696	7.97201	7.99841	8.73671	8.44037	8.36044	8.49898	7.92737	8.56534	7.57541	6.06286	7.65732	7.97941	7.82542	7.96757	8.54469	8.77855	7.78531	7.42864	8.62552	8.62087	7.73945	8.19442	6.65959	6.53171	6.96862	7.12136
DDX3X	O00571	DDX3X	ATP-dependent RNA helicase DDX3X	0.52933	-0.321045	No	0.161349	0.0965141	No	0.918511	0.315024	No	7.25127	6.29049	7.76392	7.82072	7.64236	7.60882	7.48926	7.62333	7.5038	8.14879	7.86019	7.17106	7.07886	7.72838	7.30913	7.65249	7.18069	6.82214	7.98939	7.34337	7.43228	7.45315	8.04807	7.87169	6.66987	6.28632	7.62976	7.39284	7.36356	7.16256	6.59144	6.58382	7.02093	7.28609
DDX42	Q86XP3	DDX42	ATP-dependent RNA helicase DDX42	1.17064	0.795553	No	0.354279	0.432769	No	0.675508	0.887669	No	7.19361	6.44368	6.57702	6.40287	6.66307	6.76522	5.57521	NaN	6.08514	5.09546	7.019	NaN	6.11147	5.99343	6.44569	6.72172	NaN	NaN	NaN	6.39577	5.28031	6.18646	6.86326	7.28615	NaN	6.26523	7.36387	6.98817	5.0518	5.47736	NaN	6.72381	6.97485	NaN
DDX46	Q7L014	DDX46	Probable ATP-dependent RNA helicase DDX46	0.292339	1.15786	No	0.210423	0.217241	No	0.81958	1.3097	No	7.82809	5.958	5.01759	NaN	5.17629	5.47502	NaN	NaN	NaN	5.21365	7.19388	5.9291	5.43835	6.19244	4.62151	5.11929	6.45376	NaN	5.93278	5.34126	5.60684	4.14462	6.71291	NaN	NaN	7.19019	6.89485	4.80528	5.0855	4.89036	NaN	6.19819	NaN	NaN
DDX5	P17844	DDX5	Probable ATP-dependent RNA helicase DDX5	0.597046	1.85291	No	0.756815	1.22195	No	0	NaN	No	7.02496	5.49117	6.47603	7.19672	7.22612	NaN	5.9697	3.46458	NaN	4.20029	NaN	5.92736	NaN	7.10309	7.03385	7.42421	5.75337	NaN	6.78487	NaN	6.15666	5.85751	7.92471	7.0111	NaN	5.61034	8.31597	7.01323	NaN	NaN	NaN	NaN	NaN	NaN
DDX6	P26196	DDX6	Probable ATP-dependent RNA helicase DDX6	0.255595	0.179853	No	0.184732	-0.149192	No	0	1.98467	No	NaN	NaN	5.27844	5.18142	5.58887	NaN	6.25722	4.88394	5.51152	5.11372	5.55426	NaN	5.19555	5.47727	NaN	5.36167	NaN	NaN	5.88707	5.51076	5.29415	5.08425	6.36221	5.55913	NaN	NaN	5.36385	NaN	NaN	3.57446	5.17521	NaN	NaN	NaN
DECR1	Q16698	DECR	2,4-dienoyl-CoA reductase	1.67912	-0.32133	No	0.378693	-0.117683	No	0.16276	0.0580693	No	8.49842	8.30206	8.53802	7.74123	8.37562	8.81259	8.75644	8.8682	8.24457	8.3802	7.97901	7.93916	8.15073	7.74447	7.6346	8.15531	8.15152	8.52333	8.1964	7.31175	7.81188	8.3145	8.33773	8.45954	7.78287	7.85107	7.44134	8.44339	8.04843	8.36414	8.29782	7.74333	7.51844	7.99538
DEFA1	P59665	DEF1	Neutrophil defensin 1	0.596061	0.465893	No	0.0496501	0.166515	No	0.585312	1.32728	No	7.47037	7.33124	8.27722	8.75304	10.6639	8.02993	7.44998	6.97959	7.73039	9.97644	9.67208	8.80895	6.71938	8.748	9.12321	6.54333	6.55977	6.05117	11.5545	8.47562	9.52697	6.44787	8.08609	9.28162	10.7943	7.17366	10.6955	7.76512	9.08602	7.87907	5.86427	6.97576	6.92525	9.10223
DES	P17661	DESM	Desmin	0	2.04969	No	0.196275	0.524797	No	0.216798	0.34819	No	NaN	NaN	NaN	6.98599	5.48894	NaN	NaN	4.69861	4.9363	NaN	NaN	NaN	3.83853	6.38285	5.35565	4.19034	NaN	NaN	NaN	NaN	4.01417	4.48223	NaN	5.46389	NaN	NaN	5.04113	5.34693	NaN	5.60623	NaN	NaN	NaN	4.50821
DGKB	Q9Y6T7	DGKB	Diacylglycerol kinase beta	0	1.07413	No	0	-0.388191	No	0	1.06687	No	NaN	NaN	NaN	NaN	5.44699	NaN	5.52734	NaN	4.56671	4.37286	NaN	NaN	4.97455	5.22873	NaN	NaN	NaN	NaN	5.36275	NaN	5.52305	4.61305	4.74545	NaN	NaN	NaN	NaN	NaN	3.67859	NaN	NaN	NaN	NaN	NaN
DGKQ	P52824	DGKQ	Diacylglycerol kinase theta	0.39861	-0.513167	No	0.513653	-0.267041	No	0.287157	-0.45785	No	6.58134	4.96745	6.65402	NaN	6.34652	6.54792	6.44378	NaN	7.89363	6.44312	NaN	NaN	5.89341	7.2431	6.96109	5.87471	7.12184	NaN	5.70795	7.30125	7.33663	6.69465	5.60854	NaN	NaN	NaN	6.36175	NaN	6.5482	NaN	6.5421	NaN	6.33779	NaN
DGKZ	Q13574	DGKZ	Diacylglycerol kinase zeta	0.425263	-0.138405	No	0.150543	0.0723405	No	0.148301	-0.159352	No	6.69554	NaN	6.60468	6.71788	7.22887	6.96067	6.9123	7.05798	6.61753	7.16441	6.73556	NaN	6.6376	6.51191	7.05831	6.86654	7.10451	NaN	5.99192	6.57475	6.76039	7.01664	6.33038	6.15807	NaN	NaN	6.94799	NaN	6.42311	6.99397	NaN	NaN	6.49741	NaN
DGLUCY	Q7Z3D6	GLUCM	D-glutamate cyclase, mitochondrial	0.24929	-0.275476	No	0.0698431	-0.0657015	No	0.399987	-0.953932	No	7.8226	6.16434	7.06368	5.48358	7.61856	6.89708	6.88643	7.47933	7.06151	7.20578	NaN	6.8476	NaN	7.91087	6.37842	8.07977	7.38344	NaN	NaN	7.39924	6.925	8.24191	6.94972	6.51449	NaN	8.24787	NaN	7.40104	NaN	8.1572	7.23841	NaN	6.63339	7.6662
DHRS1	Q96LJ7	DHRS1	Dehydrogenase/reductase SDR family member 1	NaN	0	No	0	NaN	No	0	NaN	No	NaN	NaN	NaN	NaN	NaN	NaN	NaN	NaN	NaN	NaN	NaN	NaN	NaN	NaN	NaN	NaN	NaN	NaN	6.42365	NaN	NaN	NaN	NaN	NaN	NaN	6.08046	NaN	NaN	NaN	NaN	NaN	NaN	NaN	NaN
DHRS7	Q9Y394	DHRS7	Dehydrogenase/reductase SDR family member 7	0.473266	0.384151	No	0.319108	-0.245025	No	0.0178085	0.0595763	No	6.45836	NaN	7.54283	NaN	7.3302	NaN	6.80708	7.38287	6.04188	6.72186	NaN	NaN	NaN	6.30771	6.61211	7.05185	NaN	NaN	6.89894	6.32292	7.08695	NaN	7.29951	6.42841	NaN	6.31471	6.83246	NaN	6.29716	7.31161	NaN	NaN	NaN	NaN
DHX15	O43143	DHX15	ATP-dependent RNA helicase DHX15	2.8074	1.19391	Yes	1.78737	0.756202	Yes	1.88783	1.35482	Yes	7.23399	7.21827	7.72092	6.91657	7.3598	6.3418	6.40564	6.17198	5.74456	5.81599	7.14133	6.36218	7.25154	7.34995	6.94987	7.12293	6.10042	6.41854	6.8024	6.37995	6.25988	5.6794	7.17014	7.2765	6.8815	6.98712	7.16281	7.19715	6.12545	5.69642	NaN	5.03014	6.32526	NaN
DHX9	Q08211	DHX9	ATP-dependent RNA helicase A	1.75442	1.4666	Yes	4.12137	1.47082	Yes	2.65481	1.38972	Yes	7.3804	6.55651	7.77124	6.53129	6.77075	4.66368	5.72928	5.99135	5.1159	6.17701	7.16321	6.67077	7.33615	7.17258	6.60735	6.94503	5.43766	5.74947	5.85319	5.40662	5.07705	5.54618	7.29021	7.23691	6.97977	7.27015	7.51048	6.8976	5.40038	6.10287	4.98937	6.85839	5.82554	5.67027
DIABLO	Q9NR28	DBLOH	Diablo IAP-binding mitochondrial protein	1.09518	0.875452	No	0	-0.30215	No	0.00788134	0.00597	No	7.6448	NaN	6.71135	NaN	NaN	6.65831	5.89347	5.94694	NaN	NaN	5.76477	NaN	NaN	NaN	NaN	6.55944	NaN	NaN	NaN	5.87261	6.25542	6.8616	6.6963	NaN	NaN	6.9443	6.33331	7.19695	6.47905	NaN	NaN	NaN	NaN	7.40226
DIAPH1	O60610	DIAP1	Protein diaphanous homolog 1	NaN	0	No	0	NaN	No	NaN	0	No	NaN	NaN	NaN	NaN	NaN	NaN	NaN	NaN	NaN	NaN	NaN	NaN	NaN	NaN	NaN	NaN	NaN	NaN	4.28381	NaN	NaN	NaN	NaN	NaN	NaN	NaN	NaN	NaN	NaN	NaN	NaN	NaN	NaN	NaN
DIRAS2	Q96HU8	DIRA2	GTP-binding protein Di-Ras2	2.4177	-0.654075	No	1.18767	-0.207361	No	0.189842	-0.225163	No	6.40839	NaN	7.03694	6.40517	6.99278	6.86774	7.17541	7.72048	7.25205	7.61931	6.34263	NaN	7.00508	6.71469	6.66496	6.97903	6.64572	NaN	7.02894	7.0883	7.00798	6.97225	NaN	5.41305	NaN	5.43627	6.26536	6.67102	6.25157	6.46999	6.75422	NaN	6.18199	6.37293
DKK3	Q9UBP4	DKK3	Dickkopf-related protein 3	0.732609	-0.244857	No	0.240119	0.0556707	No	0.484342	-0.198052	No	7.79726	8.34682	8.64133	8.25086	7.75612	8.4432	8.71858	8.40205	8.64222	7.81062	8.27856	7.33952	7.98586	8.59219	8.49085	8.62759	8.22391	7.69182	7.79533	8.623	8.28661	8.35987	7.23548	7.94412	7.75063	7.23704	8.17375	8.22904	7.3753	8.21195	8.59192	7.41919	8.48538	7.67461
DLAT	P10515	ODP2	Dihydrolipoyllysine-residue acetyltransferase component of pyruvate dehydrogenase complex, mitochondrial	0.656854	-0.180964	No	0.163723	-0.0767283	No	0.380334	0.198206	No	10.4494	10.2875	10.457	8.91546	9.63627	10.5139	10.786	10.35	9.3744	9.62625	9.50978	9.51272	10.0244	9.90357	9.25181	9.93698	9.97953	9.81521	9.63935	9.35265	9.70044	10.1124	10.0157	9.77828	9.62715	9.81175	9.53731	10.542	9.92016	10.1746	10.0773	8.98584	9.16432	9.80076
DLD	P09622	DLDH	Dihydrolipoyl dehydrogenase, mitochondrial	1.0281	-0.314766	No	0.473635	-0.0963205	No	0.306902	-0.125438	No	10.1561	10.0892	10.3782	9.5156	10.0685	10.3363	10.6643	10.5355	10.2349	10.0104	9.48204	9.13786	10.2244	9.81927	9.82444	10.3289	9.64674	9.24236	10.0092	10.1419	10.1405	10.2141	9.70371	9.76067	9.19231	9.69917	9.37811	9.96082	9.92897	10.065	9.9583	9.43159	9.48528	9.57831
DLG1	Q12959	DLG1	Disks large homolog 1	0.0093929	0.00791323	No	0.4721	-0.265539	No	0	0.199909	No	5.83506	6.05219	6.69033	5.84003	5.64552	NaN	6.15322	6.01255	5.74599	6.28466	NaN	NaN	5.90613	5.5119	6.56546	6.41889	NaN	NaN	6.32572	6.33938	6.3061	6.49333	6.10249	5.04882	NaN	NaN	5.58495	NaN	5.90258	NaN	NaN	NaN	NaN	NaN
DLG2	Q15700-3	DLG2	Disks large homolog 2	1.65595	-0.384909	No	0.619617	-0.196804	No	1.41918	-0.293448	No	7.63895	8.1014	8.44005	7.80615	8.21491	7.9264	8.80463	8.57641	8.36521	8.45335	7.45025	7.20357	7.96973	8.0495	7.9133	8.09466	7.86005	7.96431	7.77583	8.21277	7.74045	8.30842	7.44028	7.38471	7.19835	7.12587	7.67065	7.28602	7.50319	7.55717	7.9546	7.5187	7.94817	7.38474
DLG3	Q92796	DLG3	Disks large homolog 3	0.384832	-0.13333	No	0.842026	-0.146977	No	0.499661	-0.147366	No	7.13325	7.40356	7.24096	6.92612	7.27294	7.48299	7.44026	7.15005	7.50749	7.06268	6.74506	6.04781	7.00432	7.48304	7.00163	7.55539	7.22734	6.31335	6.89099	7.56877	7.15085	7.56781	6.4873	6.77158	6.72131	7.0883	7.0648	7.146	6.74755	6.95848	7.43957	6.94344	7.05882	7.01564
DLG4	P78352	DLG4	Disks large homolog 4	1.87003	-0.665521	No	1.27179	-0.269144	No	1.42272	-0.43989	No	8.87054	9.06405	9.64788	9.26157	9.45304	9.52575	10.1823	10.0759	10.1527	9.68811	8.43692	7.92127	9.13102	9.65216	9.30085	9.4294	9.11505	8.19622	9.01514	9.79409	9.67796	9.68803	8.91178	8.31593	7.71531	7.89412	8.71742	7.80707	9.16664	8.35589	8.68918	8.6693	8.78516	8.33481
DLGAP1	O14490	DLGP1	Disks large-associated protein 1	1.10899	-0.45944	No	1.40624	-0.198485	No	0.646702	-0.304956	No	7.58253	7.58013	7.51265	7.41405	7.5774	7.34077	8.49004	8.09738	8.07921	7.95655	6.95496	6.38524	7.11248	7.54904	7.59771	7.41657	7.38819	6.53172	7.04123	7.81878	7.70927	7.71772	6.87747	6.74896	6.0941	6.02417	7.23939	6.59088	7.46726	7.03374	7.20581	5.51324	7.29321	6.89146
DLGAP2	Q9P1A6	DLGP2	Disks large-associated protein 2	0	0.10175	No	0	NaN	No	NaN	0	No	NaN	NaN	NaN	NaN	5.05667	NaN	4.94557	4.63583	3.77292	4.95492	1.69746	NaN	NaN	NaN	NaN	NaN	NaN	NaN	NaN	NaN	NaN	5.46062	NaN	NaN	NaN	NaN	NaN	NaN	NaN	NaN	NaN	NaN	NaN	NaN
DLGAP3	O95886	DLGP3	Disks large-associated protein 3	1.7117	-0.393058	No	1.09402	-0.370692	No	1.18653	-0.497435	No	7.25809	7.50148	7.79434	7.41327	7.22035	7.567	8.06544	7.83038	8.03059	7.65942	6.6011	5.5916	7.08503	7.15971	7.45541	7.52075	6.89191	6.65912	6.85893	7.61901	7.79473	7.81404	6.22694	6.35157	NaN	5.85063	7.2291	6.63113	7.2854	6.59365	6.94176	6.67516	7.62194	6.60039
DLGAP4	Q9Y2H0	DLGP4	Disks large-associated protein 4	0	0.205796	No	0	-0.363262	No	NaN	0	No	NaN	NaN	NaN	NaN	7.22833	4.40113	NaN	7.09962	7.93402	7.02253	NaN	NaN	NaN	NaN	NaN	7.02491	NaN	NaN	NaN	NaN	NaN	7.38817	NaN	NaN	NaN	NaN	NaN	NaN	NaN	NaN	NaN	NaN	NaN	NaN
DLST	P36957	ODO2	Dihydrolipoyllysine-residue succinyltransferase component of 2-oxoglutarate dehydrogenase complex, mitochondrial	1.15764	-0.253353	No	0.506869	-0.103956	No	0.0250961	0.0121919	No	9.54716	9.17062	9.46781	9.42763	9.15039	9.84665	9.80375	9.57772	9.48977	9.31249	9.29094	9.19464	9.57438	9.51685	9.42147	9.6378	9.34316	9.67835	9.43817	9.41533	9.61564	9.76917	9.01852	9.61346	8.83747	9.31013	9.33354	10.146	9.34878	9.75164	9.31455	9.06376	9.1707	9.53654
DMBT1	Q9UGM3	DMBT1	Deleted in malignant brain tumors 1 protein	0.148903	0.330894	No	0.0936122	0.29485	No	0	1.12182	No	NaN	NaN	NaN	9.40005	9.6285	9.98479	NaN	8.3071	8.39442	9.97234	9.34133	9.95638	NaN	8.99324	NaN	7.29139	NaN	NaN	11.6142	7.76046	9.4701	7.93447	8.75844	9.68661	NaN	NaN	9.89587	NaN	NaN	8.56479	NaN	NaN	NaN	NaN
DMTN	Q08495	DEMA	Dematin	0.121015	-0.0282967	No	1.81534	-0.305174	No	0.857575	-0.41253	No	8.44455	8.93619	8.88188	8.6437	8.99487	8.54363	9.26406	8.74747	8.60564	8.88187	7.98934	8.13059	8.33962	8.79077	8.21821	8.82648	8.40033	8.57809	8.27449	9.2368	8.62626	9.01007	8.11455	7.92367	7.77903	8.1713	8.43208	8.8552	8.70189	8.84415	8.68784	8.10556	9.0599	8.35167
DMWD	Q09019	DMWD	Dystrophia myotonica WD repeat-containing protein	1.14397	-0.230981	No	1.18651	-0.453552	No	0.826003	-0.280971	No	7.89702	8.34899	8.07281	8.1315	7.98852	7.8415	8.83452	8.16852	8.47036	8.27884	7.56429	6.64501	7.97103	7.95675	8.25854	8.36014	8.08994	7.96662	8.07882	8.4544	8.51094	8.37635	7.37194	7.34654	7.84933	7.49524	7.8817	7.92868	8.11383	7.90447	8.00919	7.46456	8.43966	7.62754
DMXL2	Q8TDJ6	DMXL2	DmX-like protein 2	1.78646	-0.560758	No	1.00585	-0.27853	No	0.450636	-0.163575	No	7.8741	8.20768	8.36445	8.00953	8.28654	8.11523	9.1277	8.81221	8.88045	8.61049	7.71562	6.87421	8.05938	8.27054	8.1743	8.29104	8.46622	7.39884	7.89035	8.32685	8.30027	8.67376	7.64227	7.94129	6.99356	7.55517	7.55839	7.70488	7.93315	7.83345	7.61264	7.39194	8.15773	7.44811
DNAJA1	P31689	DNJA1	DnaJ homolog subfamily A member 1	0.918789	-0.793796	No	0.37092	0.474524	No	0	NaN	No	NaN	NaN	NaN	6.74009	6.42348	4.19891	7.23714	7.64628	7.38173	7.36943	NaN	NaN	6.60436	6.56945	NaN	7.50042	NaN	NaN	6.50474	NaN	6.75751	6.65099	5.37381	6.42	NaN	NaN	NaN	NaN	NaN	NaN	NaN	NaN	6.42062	NaN
DNAJA2	O60884	DNJA2	DnaJ homolog subfamily A member 2	0.178938	-0.078727	No	0.281685	0.20929	No	0.183013	-0.126585	No	5.71045	5.43277	5.69997	5.67453	6.04129	5.91007	5.29269	6.21268	5.94014	5.59705	5.67219	5.42472	5.95391	5.45752	5.69294	5.3631	5.61149	3.73934	5.75548	5.71447	5.85366	5.63421	5.26365	4.94221	4.71733	5.59105	5.63094	5.57081	5.6035	5.9458	4.80615	NaN	5.13253	5.26988
DNAJA3	Q96EY1	DNJA3	DnaJ homolog subfamily A member 3, mitochondrial	1.60253	-0.636647	No	0.119014	0.0417778	No	0.338138	-0.356954	No	6.40408	5.66774	5.15764	6.02356	6.46274	6.42674	6.55728	6.25971	6.6118	7.04346	5.82014	NaN	5.76548	6.21107	6.07615	6.26473	5.30152	6.18226	5.74638	6.39033	6.25865	6.23179	5.76207	NaN	NaN	NaN	4.43943	5.93604	5.51946	6.03956	5.70056	4.98678	5.53481	6.15413
DNAJA4	Q8WW22	DNJA4	DnaJ homolog subfamily A member 4	0.359384	-0.551769	No	0.34585	0.512232	No	NaN	0	No	NaN	NaN	4.29853	4.589	5.11997	4.54286	4.76719	5.30259	NaN	5.21944	NaN	NaN	NaN	5.45826	4.76528	4.76159	NaN	NaN	NaN	3.86813	4.99379	4.5865	NaN	NaN	NaN	NaN	NaN	NaN	NaN	NaN	NaN	NaN	NaN	NaN
DNAJB1	P25685	DNJB1	DnaJ homolog subfamily B member 1	0.0686357	0.0526453	No	0.482518	-0.328878	No	0.876782	-0.189422	No	6.41084	6.66339	6.57338	6.43106	6.50509	5.95065	5.80223	6.93292	7.02848	6.60624	5.37293	5.77005	6.02402	6.71911	6.50995	6.34877	5.7232	NaN	7.44497	6.39449	6.48703	6.56947	5.54839	6.07901	NaN	NaN	6.15503	5.73907	5.83943	6.03483	5.423	NaN	6.53061	5.87432
DNAJB2	P25686	DNJB2	DnaJ homolog subfamily B member 2	2.24666	-0.465973	No	0.51698	-0.113717	No	0.746817	-0.245535	No	7.79979	7.86783	8.01321	8.13242	7.92411	8.41699	8.45583	8.50548	8.62921	8.05971	7.3426	7.18734	7.9121	8.41674	8.02673	7.96335	7.84145	7.04056	7.83106	8.41163	8.16453	8.24194	7.61392	7.38532	6.60723	6.81188	7.74554	7.73123	7.73457	7.55687	7.41086	7.18458	8.11847	7.36299
DNAJB4	Q9UDY4	DNJB4	DnaJ homolog subfamily B member 4	0.584551	-0.683556	No	0.0754909	-0.120825	No	0	0.113449	No	NaN	NaN	4.30913	4.78508	5.92304	NaN	5.23545	5.51287	5.8226	5.73245	NaN	NaN	NaN	5.37313	NaN	5.72253	5.29977	NaN	5.31164	5.02201	5.61482	6.3153	NaN	5.76979	5.39006	NaN	NaN	NaN	NaN	NaN	5.27662	NaN	4.66804	NaN
DNAJC11	Q9NVH1	DJC11	DnaJ homolog subfamily C member 11	1.61637	-0.304317	No	0.220885	-0.0593407	No	1.03189	-0.373688	No	10.5096	10.4634	11.0031	10.4973	10.6542	10.9862	10.9886	11.1823	10.7635	10.7287	10.091	NaN	10.7806	10.8437	10.6238	10.3042	NaN	NaN	10.5773	10.9646	10.6577	10.59	10.0935	10.2946	NaN	NaN	10.0905	10.7146	10.4123	NaN	10.2103	10.3062	10.5191	NaN
DNAJC13	O75165	DJC13	DnaJ homolog subfamily C member 13	0	-0.939953	No	0	0.158998	No	NaN	0	No	NaN	NaN	4.90653	NaN	NaN	NaN	NaN	5.84648	5.68799	5.44961	NaN	NaN	NaN	NaN	NaN	5.89129	NaN	NaN	NaN	5.9946	6.23753	5.7323	NaN	NaN	NaN	NaN	NaN	NaN	NaN	NaN	NaN	NaN	NaN	NaN
DNAJC5	Q9H3Z4	DNJC5	DnaJ homolog subfamily C member 5	0.286552	0.299104	No	0.359844	-0.417665	No	0.468382	1.11245	No	4.77804	5.02796	4.43678	4.17301	4.60211	3.05792	4.31957	4.62851	4.87936	4.63702	2.98335	2.92406	5.01069	3.30872	3.87607	3.45599	5.34281	3.03357	3.63268	3.66709	4.07916	4.30956	4.6947	3.88648	NaN	NaN	3.37753	3.86921	4.24041	2.11588	4.0277	NaN	NaN	NaN
DNAJC6	O75061	AUXI	Putative tyrosine-protein phosphatase auxilin	2.98743	-0.655997	No	0.379245	-0.137907	No	0.125578	0.059876	No	7.56037	7.8221	8.48994	7.89664	7.7586	8.22968	8.65646	8.92095	8.43758	8.56297	7.43724	7.3274	7.87983	8.17926	7.86981	7.9227	8.21634	7.35579	7.54337	8.13497	8.21576	7.97744	7.72523	7.22115	7.41144	7.46446	7.76356	8.14664	7.66571	7.81808	7.3408	7.55496	7.59545	7.39824
DNASE1L2	Q92874	DNSL2	Deoxyribonuclease-1-like 2	0.411761	0.798163	No	1.61245	0.372872	No	0	2.33855	No	NaN	NaN	5.85697	7.45917	NaN	7.20084	NaN	5.61505	6.10477	7.6788	5.73542	6.68448	NaN	6.31131	NaN	4.65969	NaN	NaN	NaN	5.92414	6.46007	4.30112	5.95043	7.19685	6.05308	NaN	NaN	NaN	NaN	4.85831	NaN	NaN	NaN	NaN
DNM1	Q05193	DYN1	Dynamin-1	2.72076	-0.69175	No	1.44959	-0.368088	No	1.69401	-0.372987	No	11.4625	11.3484	11.7621	11.4681	11.6378	12.0813	12.3491	12.4899	12.1687	12.0486	10.7602	10.1341	11.4894	11.8955	11.3013	11.5443	11.3648	10.7284	11.3511	12.0109	11.9326	11.9456	11.3892	10.8949	10.428	10.5721	11.1985	10.9673	11.6948	11.4316	11.2567	10.6671	11.5266	11.1111
DNM1	Q05193-2	DYN1	Dynamin-1	0.726533	-1.00742	No	0.241465	-0.128954	No	0	-0.383239	No	6.97341	3.38444	7.6443	7.12799	6.96429	6.95647	6.89278	8.02196	7.72186	7.53847	6.91468	5.66784	6.21408	7.6465	6.10018	6.24144	6.67322	6.29791	7.0243	7.10691	5.9738	6.48231	6.90322	7.20136	NaN	NaN	NaN	3.94315	7.28645	NaN	5.17351	NaN	NaN	NaN
DNM1L	O00429	DNM1L	Dynamin-1-like protein	1.44169	-0.292267	No	0.983854	-0.241068	No	1.22261	-0.24826	No	9.60355	9.82884	9.94025	9.76579	9.75508	9.72917	10.4752	10.1985	10.0573	9.89473	9.24574	8.59577	9.71074	9.55632	9.34401	10.032	9.61561	9.35759	9.60555	9.73537	9.49123	10.1256	9.12657	9.33877	9.18259	9.13664	9.01968	9.45846	9.42445	9.49539	9.59926	9.24263	9.6332	9.35734
DNM3	Q9UQ16	DYN3	Dynamin-3	1.43233	-0.491767	No	0.905968	-0.292385	No	1.33501	-0.355102	No	8.20448	8.76899	8.90905	8.69529	8.76676	9.2509	9.27284	9.0225	9.23672	9.02044	7.87904	8.08082	8.57598	9.15822	8.8089	8.49451	8.70191	7.98403	8.58869	9.19613	9.07461	9.2064	8.03787	8.22674	7.53662	7.82705	8.35808	8.01682	8.93025	8.74151	7.90337	7.7925	8.6715	8.09468
DNPH1	O43598	DNPH1	2'-deoxynucleoside 5'-phosphate N-hydrolase 1	0.014947	0.0199078	No	0.265262	-0.0963373	No	0	NaN	No	5.67606	6.06795	4.36495	5.69713	5.22758	NaN	5.18535	5.38478	6.03721	4.67065	5.11677	NaN	NaN	5.29747	NaN	5.02855	5.47806	NaN	5.41389	5.26932	4.86625	4.98443	NaN	NaN	NaN	NaN	5.94648	NaN	NaN	NaN	NaN	4.32322	NaN	NaN
DOCK10	Q96BY6	DOC10	Dedicator of cytokinesis protein 10	0	-0.354318	No	0.367444	-0.147722	No	0	NaN	No	NaN	NaN	NaN	NaN	5.25535	6.32606	5.43614	6.25521	5.50669	5.60967	NaN	NaN	NaN	5.59816	NaN	6.2094	NaN	NaN	4.84429	5.62788	5.49624	6.47513	NaN	NaN	NaN	NaN	NaN	NaN	6.39642	NaN	NaN	NaN	NaN	NaN
DOCK4	Q8N1I0	DOCK4	Dedicator of cytokinesis protein 4	1.39221	-0.374668	No	1.02399	-0.362769	No	0.389617	-0.363309	No	6.95583	6.04068	6.69565	6.24071	7.53931	7.21987	6.42779	6.80696	7.08593	7.80497	6.27372	5.80715	6.7509	7.16706	6.75174	7.35883	7.08311	NaN	6.72014	7.24319	7.44283	7.62683	6.79677	5.60199	NaN	NaN	6.70731	6.3706	6.81106	6.6643	6.38884	5.62429	6.72063	NaN
DPP10	Q8N608	DPP10	Inactive dipeptidyl peptidase 10	0.410535	0.0615554	No	0	NaN	No	NaN	0	No	NaN	NaN	5.1618	NaN	4.36973	NaN	6.41987	5.05719	4.42804	4.35123	NaN	NaN	NaN	NaN	NaN	4.92724	NaN	NaN	NaN	NaN	NaN	NaN	NaN	NaN	NaN	NaN	NaN	NaN	NaN	NaN	NaN	NaN	NaN	NaN
DPP3	Q9NY33	DPP3	Dipeptidyl peptidase 3	1.0461	-0.721752	No	0.592092	-0.242584	No	0	2.05949	No	6.29604	6.2787	7.38496	7.91545	7.22734	6.44559	7.7246	7.78678	7.9686	8.78568	6.54071	7.4571	6.84972	7.51791	7.12886	7.12576	6.66383	NaN	7.57402	7.14991	7.59675	7.39139	NaN	7.73875	NaN	NaN	7.2736	NaN	NaN	5.67925	6.79708	NaN	NaN	NaN
DPP6	P42658	DPP6	Dipeptidyl aminopeptidase-like protein 6	1.87825	-0.614074	No	2.58559	-0.447562	No	1.29436	-0.511826	No	7.27757	7.07734	7.74139	7.23881	7.48728	7.67589	8.16184	8.23662	8.03774	7.78067	6.61197	6.91565	6.97993	7.0165	7.57892	7.46589	7.31983	7.3023	7.44151	7.55856	7.68995	7.94207	7.03497	6.58834	6.71153	5.90419	6.85351	7.58476	7.66397	7.15898	7.48675	6.85064	7.44975	7.13818
DPP7	Q9UHL4	DPP2	Dipeptidyl peptidase 2	0.114232	-0.108943	No	0.75052	0.231501	No	0.587203	0.295216	No	6.1649	5.49121	6.80369	6.65646	6.99141	7.26917	6.01567	7.00037	6.24298	6.12422	7.26972	7.07607	6.29218	6.77568	6.83736	6.40537	NaN	NaN	6.10668	6.16166	6.81804	6.29821	6.12028	6.95231	NaN	6.34982	6.85108	7.30698	5.98251	6.87598	NaN	NaN	NaN	6.63543
DPYSL2	Q16555	DPYL2	Dihydropyrimidinase-related protein 2	0.441568	-0.10361	No	0.923941	-0.177465	No	1.05936	-0.327575	No	14.2388	14.9138	14.8193	14.1871	14.7284	14.3014	15.0473	14.7225	14.6589	14.6752	13.9626	13.3197	14.3087	14.4477	14.6616	14.5892	14.3836	13.6593	14.3781	14.6967	14.4339	14.8026	14.2062	14.0782	13.6487	13.3196	13.8731	14.2302	14.5223	14.3828	14.6639	13.4859	14.1717	14.0949
DPYSL3	Q14195	DPYL3	Dihydropyrimidinase-related protein 3	1.18243	-0.188011	No	1.06749	-0.180655	No	1.12581	-0.293135	No	12.8189	13.2767	13.4268	12.4989	13.1711	13.0108	13.4536	13.5019	12.961	13.2051	12.4829	12.1331	12.9697	12.6001	12.8342	13.2569	13.0288	12.2683	12.8977	12.7517	12.9136	13.5008	13.3257	13.2139	12.4637	11.727	12.6306	13.4728	13.5699	13.7955	13.1538	11.8479	12.9478	13.2775
DPYSL3	Q14195-2	DPYL3	Dihydropyrimidinase-related protein 3	0.352696	0.106529	No	0.164184	0.0844424	No	0.360734	-0.236335	No	6.84562	7.00813	7.4965	6.88058	7.1007	6.69418	7.29	7.15835	6.94442	6.71195	7.85872	6.93295	7.52949	6.79098	7.08676	8.15212	8.35571	6.87617	6.60066	6.79042	7.28707	7.93433	7.58468	7.55488	6.40809	6.17266	7.56181	8.95511	7.34369	8.50579	6.99541	NaN	7.98256	8.41881
DPYSL4	O14531	DPYL4	Dihydropyrimidinase-related protein 4	2.18567	-0.422954	No	1.46938	-0.306609	No	0.69988	-0.244971	No	10.8569	11.2488	11.2153	10.6338	11.0717	11.1919	11.8224	11.5328	11.2901	11.304	10.5008	9.69909	10.9067	10.914	10.4982	10.8314	10.9118	10.3106	10.7463	11.1508	10.8929	11.1776	10.7179	10.2747	10.0319	9.96854	10.171	10.3704	10.8961	10.7175	11.001	10.0078	10.1332	10.2487
DPYSL5	Q9BPU6	DPYL5	Dihydropyrimidinase-related protein 5	0.305696	-0.0818575	No	0.611645	-0.177536	No	0.232643	-0.12345	No	8.70042	9.23631	9.26295	8.33816	8.78662	8.70885	9.3744	9.00451	8.7563	8.88969	8.45015	8.23054	8.8672	8.8264	8.33935	8.79468	8.77024	8.81201	8.50436	9.07126	8.30509	9.11058	8.35513	8.4616	8.4635	8.42044	8.61461	8.93083	8.31596	8.99395	9.14631	8.42056	8.94058	8.16945
DRG1	Q9Y295	DRG1	Developmentally-regulated GTP-binding protein 1	0.503098	0.121528	No	0.95022	0.505041	No	0.276619	0.505352	No	5.6357	5.88911	6.27624	5.77421	5.90967	5.43448	5.97548	5.82607	5.60219	6.03906	6.44203	6.47517	6.22845	6.26404	4.5766	6.04589	5.86613	5.07473	5.40431	6.09452	5.09044	5.47179	5.02511	6.01927	5.64775	5.83625	5.47145	3.57139	4.59756	NaN	3.41935	5.21791	NaN	4.82426
DSC1	Q08554	DSC1	Desmocollin-1	0.702291	-1.34187	No	0.432589	0.907497	No	0.412562	0.736698	No	7.86474	8.16141	11.3933	11.8059	11.8019	11.9374	10.7004	11.4924	11.0466	12.5598	11.3983	12.3929	10.2337	11.4429	9.68561	10.173	8.87293	8.08618	11.0179	10.7271	11.6532	9.52412	11.3061	12.9332	10.7355	9.99356	12.5456	8.9845	11.9783	11.1087	8.46597	9.65346	9.75499	11.1168
DSC2	Q02487	DSC2	Desmocollin-2	0.710466	0.365079	No	0.16395	-0.512335	No	0.374928	1.0937	No	NaN	NaN	6.22853	7.07736	7.03442	7.60384	5.93635	5.56452	6.65828	7.02227	6.73305	7.75741	6.40321	6.45419	5.02175	5.38698	NaN	NaN	9.01328	5.9391	7.21005	3.15303	6.30991	7.6797	5.64347	NaN	7.82512	NaN	7.16431	6.46388	NaN	NaN	4.90544	6.65872
DSC3	Q14574-2	DSC3	Desmocollin-3	0.757423	-1.32779	No	0.264607	0.524429	No	0.684856	1.02644	No	5.91503	6.38282	8.97914	9.09325	8.97075	9.79152	8.49996	8.82523	8.50433	10.3589	9.00016	10.0007	7.6801	8.80706	7.46466	7.29723	6.70106	6.58772	8.83969	8.32879	9.05194	7.59413	8.80453	10.5133	8.45811	7.72312	10.2949	7.11344	9.07545	8.61382	5.90945	7.20579	7.34623	8.59805
DSG1	Q02413	DSG1	Desmoglein-1	0.640375	-1.34764	No	0.366736	0.743596	No	0.485918	0.822986	No	7.89222	8.78143	11.9084	12.3989	12.2638	12.3121	11.2568	11.7383	11.5609	13.1148	11.6679	12.7176	10.7151	11.8898	9.95143	10.5482	9.37759	8.98805	11.6432	11.0729	12.1049	9.84197	11.5713	13.3382	11.198	10.2628	12.968	9.4596	12.0008	11.4887	9.03306	9.84982	10.0123	11.4753
DSG3	P32926	DSG3	Desmoglein-3	0.133919	0.264636	No	0.731618	-1.2943	No	0.306796	0.920507	No	NaN	NaN	3.80955	5.39404	6.28633	6.25663	NaN	4.14262	NaN	5.42399	4.60853	6.7297	NaN	6.38068	4.85877	4.25817	NaN	NaN	8.76814	NaN	6.54129	5.16425	5.58041	6.77562	NaN	NaN	6.38959	NaN	5.56153	4.95348	NaN	5.2701	NaN	NaN
DSG4	Q86SJ6	DSG4	Desmoglein-4	0	NaN	No	0	-0.38978	No	NaN	0	No	NaN	NaN	NaN	NaN	NaN	7.63526	NaN	NaN	NaN	4.71996	NaN	NaN	NaN	6.66648	NaN	NaN	NaN	NaN	NaN	7.05626	NaN	NaN	NaN	NaN	NaN	NaN	NaN	NaN	NaN	NaN	NaN	NaN	NaN	NaN
DSP	P15924	DESP	Desmoplakin	0.681475	-1.26325	No	0.186323	0.474025	No	0.459007	0.682815	No	8.62985	9.12785	12.1778	12.5626	12.5284	12.5356	11.5203	12.1584	11.8064	13.322	11.9164	12.8354	10.6746	12.1726	9.89462	10.8375	9.51747	9.15407	12.7066	11.4275	12.3942	10.2871	12.1682	13.7837	11.0118	10.6321	13.2948	10.0079	12.686	12.0274	9.90136	10.4197	10.2897	11.4774
DST	Q03001	DYST	Dystonin	0.203798	-0.0595486	No	0.231389	-0.0774384	No	0.0576683	0.0280995	No	8.57593	8.76165	8.87809	8.46138	8.38369	9.0427	8.90487	8.78185	8.32891	8.30015	8.40168	8.85005	8.79556	8.28876	8.59231	8.48242	8.91967	8.70264	8.52501	8.58682	8.38458	8.75667	8.36144	8.54473	8.54021	8.74399	8.56827	9.04734	8.44884	8.7271	9.01759	8.42308	8.6768	8.34398
DSTN	P60981	DEST	Destrin	0.364592	0.215472	No	2.52401	0.362253	No	0.457052	0.20161	No	12.4069	11.8308	12.4571	11.262	11.6157	11.47	11.7529	11.8474	11.6857	11.7393	11.4575	10.5234	11.7801	11.8753	11.7818	12.0445	10.9194	9.94665	11.6005	11.6638	11.4749	11.6839	10.9638	11.3161	11.4216	10.465	11.4391	10.7177	11.1786	10.7426	11.2639	10.052	10.6755	11.2011
DTD1	Q8TEA8	DTD1	D-aminoacyl-tRNA deacylase 1	0.640834	0.156883	No	0.373721	0.117773	No	0.288872	0.16842	No	8.76713	9.40918	8.77206	9.02786	8.18929	8.89744	8.9347	8.56455	8.74575	8.23867	8.47217	8.59622	8.78524	8.51491	8.83243	8.74127	8.55523	8.53227	8.19024	8.87837	8.51173	8.56777	8.03157	7.97814	8.62083	8.70546	8.48048	8.89874	7.98303	8.39001	8.81026	8.363	8.51361	7.6448
DTNA	Q9Y4J8	DTNA	Dystrobrevin alpha	0.429911	-0.0856251	No	0.4535	0.16725	No	1.28453	-0.50935	No	6.46638	6.87386	7.02142	6.66842	6.69062	6.49024	6.88628	7.3791	6.52349	6.86971	6.75136	6.79896	6.25973	6.58973	6.39196	7.31355	6.63828	6.01728	6.03331	6.32767	6.855	7.23026	6.94914	7.35905	5.72992	5.27435	6.79166	7.39232	7.12903	7.71131	6.83557	5.88919	7.77816	7.20927
DUSP14	O95147	DUS14	Dual specificity protein phosphatase 14	0	-2.39542	No	0	NaN	No	0	NaN	No	NaN	NaN	6.17226	NaN	5.12501	8.04096	NaN	NaN	NaN	7.52044	NaN	6.66829	NaN	NaN	NaN	NaN	NaN	NaN	NaN	NaN	NaN	NaN	NaN	7.90689	NaN	NaN	7.1324	NaN	NaN	NaN	NaN	NaN	NaN	NaN
DUSP3	P51452	DUS3	Dual specificity protein phosphatase 3	2.01353	-0.637377	No	0.630829	-0.19213	No	0.422025	-0.118039	No	5.87739	6.17358	6.10864	6.01551	6.9332	6.31971	7.19692	6.92054	6.68492	7.17311	5.38726	NaN	5.99969	6.81651	6.03241	6.63408	5.35509	NaN	6.16787	6.7208	6.71507	6.87178	5.97016	6.02183	NaN	NaN	5.42653	NaN	6.16799	NaN	5.90672	NaN	5.46478	NaN
DYNC1H1	Q14204	DYHC1	Cytoplasmic dynein 1 heavy chain 1	2.41988	-0.513315	No	2.07935	-0.169613	No	1.04033	-0.238964	No	9.20752	9.18862	9.54332	9.18754	9.44571	9.78383	9.93556	9.93494	9.78085	9.70411	9.02787	8.47076	9.27805	9.3902	9.32387	9.45648	9.36941	8.63694	9.33772	9.60161	9.447	9.57222	9.16222	9.09958	8.51009	8.75227	8.95489	9.08595	9.39831	9.369	9.27165	8.85338	9.07397	9.03248
DYNC1I1	O14576-2	DC1I1	Cytoplasmic dynein 1 intermediate chain 1	0.00761723	0.00324907	No	0.211707	0.0565948	No	0.496448	-0.190343	No	7.80581	8.73407	8.70713	8.271	8.23762	8.31126	8.78071	8.47177	8.21485	7.9608	8.40835	7.74653	8.04468	8.23314	8.05055	8.39657	7.94837	7.90705	7.88706	8.50826	8.00256	8.28695	7.93072	7.59524	8.02474	7.27274	7.7561	7.71398	7.95399	7.68902	8.16293	7.98892	8.36533	7.27538
DYNC1I2	Q13409	DC1I2	Cytoplasmic dynein 1 intermediate chain 2	0.341734	0.142285	No	0.296471	-0.1861	No	0.089313	-0.0815508	No	5.44999	5.59588	6.51988	5.68309	6.23911	NaN	5.90663	6.07105	5.57282	5.91831	4.60356	5.5788	6.2668	5.99415	5.66613	6.13842	5.78878	NaN	6.34699	5.99085	5.46078	6.01216	6.21662	6.22575	5.0632	4.80416	4.43695	5.32596	5.29618	5.81802	5.85265	NaN	5.08108	5.62832
DYNC1LI1	Q9Y6G9	DC1L1	Cytoplasmic dynein 1 light intermediate chain 1	0.188226	-0.0712329	No	0.931418	-0.197108	No	1.25982	-0.402092	No	7.17508	8.24488	7.73673	7.52185	7.68285	7.76148	8.0067	7.68825	7.69067	7.57045	7.22178	6.53596	7.49508	7.12977	7.21442	7.37334	7.22503	6.67063	7.59399	7.28116	7.30147	8.08073	6.37742	6.34364	6.82717	6.54607	6.595	6.47843	7.1516	7.11249	7.21506	7.17698	6.50426	6.41989
DYNC1LI2	O43237	DC1L2	Cytoplasmic dynein 1 light intermediate chain 2	0.749839	-0.207448	No	0.0296147	-0.00777539	No	0.181491	-0.0711185	No	7.6747	8.22089	8.64656	8.39237	8.31101	8.10731	8.72191	8.45855	8.43316	8.56185	8.13116	7.32995	8.38249	8.40277	7.75642	8.54963	8.23141	7.32377	7.9841	8.53548	7.98803	8.53627	7.91482	7.70936	7.45323	6.88102	7.69476	7.09583	7.8482	8.00396	7.76649	6.92431	7.10849	7.52428
DYNLL1	P63167	DYL1	Dynein light chain 1, cytoplasmic	0.340214	-0.754298	No	0	NaN	No	0	-0.852942	No	NaN	NaN	2.26849	3.12163	4.90452	NaN	3.88977	3.87101	4.67657	4.00995	NaN	NaN	NaN	NaN	NaN	4.19351	NaN	NaN	5.74929	NaN	3.32353	NaN	3.38807	5.64329	NaN	NaN	3.32948	NaN	4.24101	NaN	NaN	NaN	NaN	NaN
DYNLL2	Q96FJ2	DYL2	Dynein light chain 2, cytoplasmic	0.0895772	-0.0729004	No	0.1199	0.053441	No	0.216308	0.130317	No	5.0228	3.47934	4.28084	5.22075	5.46319	4.75984	4.57066	4.57557	5.02666	4.89869	4.61161	NaN	5.39347	3.96185	NaN	5.0315	4.81813	NaN	4.97224	4.17941	5.62531	4.8149	5.00471	5.19881	NaN	NaN	4.57517	NaN	5.0584	4.88448	NaN	NaN	NaN	4.48662
DYNLRB1	Q9NP97	DLRB1	Dynein light chain roadblock-type 1	0.403157	0.123561	No	0.279991	-0.0860543	No	0.0604764	0.0293483	No	8.13124	7.95986	7.15644	7.54068	7.50962	7.53744	8.06267	7.28385	7.38292	7.41316	7.28912	6.16802	7.47878	7.57919	7.37287	7.57147	7.61013	6.12357	7.21345	8.16346	7.31915	7.54602	6.93749	7.11614	7.62641	7.30231	7.1682	7.51585	7.36517	7.37828	7.64403	7.07369	7.2636	6.76555
ECH1	Q13011	ECH1	Delta(3,5)-Delta(2,4)-dienoyl-CoA isomerase, mitochondrial	0.306804	-0.0990441	No	0.154106	-0.0408036	No	0.0736131	0.0290444	No	8.19105	8.10164	8.30357	7.50392	7.77486	8.57551	8.16743	7.96895	7.86548	7.79287	7.90192	7.62156	7.61624	7.73059	7.90373	7.81913	7.79573	8.08839	7.4943	7.78863	7.69934	7.97161	8.32775	7.71183	7.84591	8.25779	7.47854	7.87991	8.25654	7.80271	8.19829	7.60933	7.40361	8.057
ECHS1	P30084	ECHM	Enoyl-CoA hydratase, mitochondrial	1.32824	-0.412742	No	0.833922	-0.171189	No	0.517238	-0.129156	No	8.452	8.35336	9.15901	8.54379	8.82062	8.92889	9.26453	9.21888	8.9612	9.019	7.80601	7.59629	8.51625	8.4714	8.45243	8.73977	8.24312	7.97925	8.46553	8.39637	8.80945	8.71558	8.58689	8.32555	7.87815	7.65664	7.93971	7.97245	8.87727	8.47161	8.44633	7.65271	7.94432	7.74209
ECI1	P42126	ECI1	Enoyl-CoA delta isomerase 1, mitochondrial	0.110157	0.185447	No	0	0.0011735	No	0.148558	-0.344223	No	7.99146	6.19207	6.98908	NaN	6.61015	6.16688	7.02992	6.70191	6.77545	7.14228	6.53043	NaN	NaN	7.04117	6.96104	NaN	NaN	NaN	NaN	NaN	6.95987	NaN	6.43713	6.95308	5.9704	NaN	NaN	7.34717	NaN	NaN	7.01811	NaN	NaN	6.98791
ECM1	Q16610	ECM1	Extracellular matrix protein 1	0.0042161	0.00480318	No	1.85548e-05	4.63327e-05	No	0.366292	0.554352	No	6.69874	6.43278	7.837	8.81674	9.36101	7.31814	7.2984	7.92895	7.59332	8.98344	7.89381	8.32419	6.79526	8.21899	6.07722	6.73174	6.26277	6.5929	9.66451	7.19363	8.29294	6.03419	7.49006	9.30744	7.01731	6.76543	8.49452	6.46903	8.34362	7.77429	6.10044	NaN	6.33747	7.45078
ECPAS	Q5VYK3	ECM29	Proteasome adapter and scaffold protein ECM29	0.0896632	-0.151435	No	0.126668	0.147347	No	0	NaN	No	NaN	NaN	7.13479	6.0321	6.61329	NaN	6.73103	6.31944	7.17009	6.74497	6.68329	NaN	6.48013	5.92985	6.8124	5.60533	NaN	NaN	5.46259	6.45475	6.11026	6.21073	5.32796	5.5125	NaN	5.70684	6.70087	NaN	NaN	NaN	NaN	NaN	NaN	NaN
EDF1	O60869	EDF1	Endothelial differentiation-related factor 1	1.15476	0.540958	No	0.247413	0.318171	No	0	NaN	No	6.67826	5.04457	6.33878	NaN	6.76281	5.67776	4.32601	6.20168	6.23409	6.45514	7.06567	NaN	NaN	5.34418	6.00582	7.08084	NaN	NaN	5.90822	NaN	6.07934	6.37098	5.51737	NaN	NaN	5.69511	6.70683	NaN	NaN	6.33126	NaN	NaN	NaN	NaN
EEA1	Q15075	EEA1	Early endosome antigen 1	0.32682	-0.211739	No	1.20702	-0.156615	No	0.262842	0.279955	No	7.09075	6.31811	7.48301	7.67069	7.86363	6.51035	7.35409	7.46359	7.84236	8.31451	7.3408	6.80107	7.37872	7.68944	7.709	7.38191	7.4191	7.0137	7.79751	7.70906	7.69944	7.60182	7.79262	7.33426	6.76341	NaN	7.4052	7.19774	8.25174	7.13008	NaN	NaN	5.95711	7.27108
EEF1A2	Q05639	EF1A2	Elongation factor 1-alpha 2	0.0365823	-0.029707	No	2.52374	0.717441	Yes	0.971284	0.628641	No	7.17573	7.70894	8.22698	8.41956	7.43845	7.54408	8.57606	7.80802	7.74486	7.44517	7.34828	NaN	7.08038	7.98212	6.89578	7.4479	6.74805	6.41622	6.1597	7.40953	6.44098	6.40899	7.24428	7.81356	5.7084	6.14293	6.39653	5.58006	7.04421	6.01747	5.59706	NaN	5.88176	5.05914
EEF1B2	P24534	EF1B	Elongation factor 1-beta	0.210948	0.695758	No	0	NaN	No	0	1.80192	No	7.66699	4.66138	5.82996	NaN	5.62928	4.64411	4.78658	NaN	4.76151	6.43969	NaN	NaN	NaN	6.04339	NaN	NaN	NaN	5.93947	6.47622	NaN	6.21101	5.15437	7.34394	5.87397	5.93034	7.67979	5.14705	NaN	NaN	NaN	NaN	5.87787	NaN	NaN
EEF1D	P29692	EF1D	Elongation factor 1-delta	0.451317	0.188014	No	0.112399	-0.0732257	No	1.29771	0.428259	No	6.70104	7.01589	7.24303	7.11334	7.2222	5.8147	7.01941	7.37268	7.00526	7.14337	7.24712	5.62423	6.64751	7.47187	7.34118	7.07655	6.67455	5.96659	7.67939	7.36011	6.90208	7.26509	7.04765	7.14063	6.71773	6.97762	7.56018	6.82601	6.95321	6.7705	6.38789	6.57551	6.336	6.67716
EEF1G	P26641	EF1G	Elongation factor 1-gamma	0.438054	-0.0510685	No	0.069285	-0.0500189	No	1.64787	0.291053	No	8.84123	9.31846	9.44858	8.82884	9.08686	8.88781	9.44925	9.30856	8.92429	9.20941	9.12566	8.67431	8.87957	8.86802	8.60821	8.91908	8.63746	8.2351	10.1163	8.77955	8.60946	8.99714	8.84843	9.02422	9.21877	8.80846	8.48243	7.86891	8.29879	8.77251	8.94465	8.47849	8.04731	7.96316
EEF2	P13639	EF2	Elongation factor 2	0.958499	-0.391911	No	0.0304024	-0.0402562	No	1.20472	0.388206	No	9.41743	9.63963	10.131	10.3132	10.0563	10.229	10.2285	10.1611	10.1566	10.7419	9.91833	10.1048	9.49325	10.2607	9.35579	9.8091	9.52741	8.51241	11.1419	9.91846	10.1111	9.97218	10.041	10.5222	9.19304	9.3627	10.1642	9.53683	9.87725	9.65336	9.00115	9.00688	9.30481	9.64732
EFHD2	Q96C19	EFHD2	EF-hand domain-containing protein D2	0.0171621	0.00479078	No	1.61096	-0.202888	No	0.131487	0.0656749	No	7.77061	8.19802	7.97154	7.78286	8.20949	7.57969	8.21858	8.22094	7.91511	7.97424	7.67597	7.26921	7.60774	7.87369	7.59425	8.14608	7.72586	7.38041	7.79783	8.33966	7.89627	8.24424	7.79938	6.81186	7.08278	7.81664	7.56072	7.62348	7.28802	6.80011	7.87053	7.48873	7.50102	7.35241
EFNB3	Q15768	EFNB3	Ephrin-B3	0	-0.133451	No	0.183542	-0.159753	No	0	NaN	No	NaN	NaN	NaN	NaN	6.52094	NaN	5.30005	6.94271	7.41901	6.65439	NaN	NaN	NaN	NaN	6.34299	7.12827	6.95956	6.4176	6.86268	7.39114	6.7684	7.02236	NaN	6.21658	NaN	NaN	NaN	6.50202	6.13056	NaN	NaN	6.65558	NaN	NaN
EFR3B	Q9Y2G0	EFR3B	Protein EFR3 homolog B	1.1276	-0.348811	No	0.0594408	-0.0349556	No	0.0401467	-0.0279051	No	5.69805	5.6712	6.56286	5.63393	6.16636	6.12644	5.92028	6.57667	6.50069	6.35239	NaN	5.78305	6.38978	6.17333	6.10051	6.22254	6.25701	5.98182	5.6363	6.26468	6.51136	6.44983	5.81993	NaN	NaN	NaN	5.97594	5.80697	6.13908	5.46939	5.34891	5.64994	6.14983	5.39765
EFTUD2	Q15029	U5S1	116 kDa U5 small nuclear ribonucleoprotein component	1.52838	0.853333	Yes	1.83364	0.711617	Yes	2.24067	1.17431	Yes	7.54811	6.31534	6.923	6.18486	6.91046	6.55876	4.70025	6.07119	6.18457	6.10034	7.56427	6.79726	7.05179	6.34608	7.01872	6.74934	6.94185	NaN	5.76652	6.13841	6.35572	5.96961	7.62784	6.50211	7.04925	7.32008	5.59549	7.01547	5.92409	4.91733	5.81882	6.6806	NaN	6.30239
EHD1	Q9H4M9	EHD1	EH domain-containing protein 1	0.850754	-0.288536	No	0.717886	-0.565625	No	0.194078	-0.0474021	No	NaN	5.86053	5.56149	5.80494	5.746	6.25403	6.01846	6.07329	5.74574	6.2896	5.16522	5.26739	4.61451	6.37051	5.33447	5.83572	NaN	NaN	6.13568	6.35309	5.57735	6.35159	5.24654	5.81473	NaN	NaN	5.8823	5.11911	5.46048	5.73668	5.3839	5.15979	5.88861	NaN
EHD3	Q9NZN3	EHD3	EH domain-containing protein 3	2.02617	-0.734473	No	0.936445	-0.224286	No	1.4755	-0.381815	No	6.52013	6.81907	7.257	6.62762	7.12419	7.72952	7.36391	8.00908	7.51392	7.40396	5.95932	6.32611	6.5132	7.37518	6.95523	6.87264	6.45024	6.21952	6.64122	7.28904	7.31341	7.43397	6.72152	6.85211	6.31491	5.79692	6.57579	6.01483	7.22958	6.6994	6.71781	6.63745	6.95276	6.32997
EHD4	Q9H223	EHD4	EH domain-containing protein 4	0.112425	0.100299	No	0.690973	0.174633	No	0.229877	0.269027	No	NaN	5.39871	6.6287	6.57382	6.33342	NaN	5.93358	5.73327	6.27803	6.58858	6.10965	6.19384	NaN	6.7217	NaN	6.44957	NaN	NaN	6.87859	6.60493	5.75781	6.21706	6.70555	6.00569	NaN	NaN	6.0531	6.59385	NaN	6.09382	NaN	NaN	NaN	5.96767
EIF2B3	Q9NR50	EI2BG	Translation initiation factor eIF-2B subunit gamma	0.290675	0.32626	No	0.258612	0.166399	No	0.272246	-0.0930055	No	6.66282	5.94901	5.71629	5.18626	6.03244	5.83812	5.94082	5.11576	6.42771	4.59311	6.67096	NaN	6.57164	6.2134	6.40739	6.49777	5.83288	NaN	6.02684	6.86805	6.2629	6.53849	5.98602	6.09754	NaN	NaN	6.207	6.33265	6.44652	6.1857	6.08478	NaN	6.04477	6.31823
EIF2B4	Q9UI10	EI2BD	Translation initiation factor eIF-2B subunit delta	0	0.135528	No	0.134858	-0.399907	No	0	-0.121174	No	NaN	NaN	4.39536	NaN	NaN	NaN	NaN	4.25983	4.73622	NaN	4.72163	NaN	3.6158	NaN	NaN	5.45744	NaN	NaN	4.9129	4.69624	NaN	4.96016	NaN	4.17716	NaN	NaN	4.92433	NaN	5.25588	NaN	NaN	NaN	5.04551	NaN
EIF2S1	P05198	IF2A	Eukaryotic translation initiation factor 2 subunit 1	0.0959102	0.0465439	No	1.00039	0.210106	No	1.09827	0.558383	No	7.45487	7.55349	7.5497	7.74507	7.43364	7.03866	7.51978	7.92616	7.2882	7.73124	7.94138	7.50213	7.65971	7.58845	7.38879	7.43739	7.23146	7.44188	7.61293	7.37788	7.20337	7.3897	7.3562	7.35196	7.24208	7.50816	7.86268	7.412	6.52927	7.69149	7.11158	6.9489	6.37315	6.72839
EIF2S2	P20042	IF2B	Eukaryotic translation initiation factor 2 subunit 2	0	NaN	No	0	0.623666	No	0	NaN	No	NaN	NaN	NaN	NaN	NaN	NaN	7.43927	NaN	7.59201	NaN	NaN	NaN	7.55057	NaN	NaN	8.38595	NaN	NaN	NaN	NaN	NaN	7.76228	NaN	NaN	NaN	NaN	NaN	NaN	NaN	7.20546	NaN	NaN	NaN	NaN
EIF2S3	P41091	IF2G	Eukaryotic translation initiation factor 2 subunit 3	0.27284	0.269547	No	0.300432	0.0900287	No	1.58094	0.508016	No	8.16469	7.85056	8.03239	7.75304	7.63299	6.45962	7.90372	7.52936	8.07852	8.11471	7.90729	7.12052	7.90052	8.16614	7.63609	8.09549	7.51167	NaN	8.23144	7.96133	7.62554	7.92542	8.02355	7.80835	7.18949	7.4701	8.17328	7.91774	7.15683	7.59805	7.16876	6.61666	7.95493	7.0392
EIF3A	Q14152	EIF3A	Eukaryotic translation initiation factor 3 subunit A	0.0706308	0.0243029	No	1.55175	0.677777	Yes	1.45556	1.03107	Yes	6.94667	6.6717	7.12989	6.89514	6.35326	6.91929	7.0801	6.79889	6.7855	6.29138	7.15118	6.87887	6.53244	7.2563	7.17766	7.06574	6.00008	NaN	6.54849	6.45654	6.2453	6.54403	7.11817	6.59697	NaN	6.61146	6.67774	6.85978	6.09615	6.05483	5.13629	6.49925	4.74231	5.31621
EIF3B	P55884	EIF3B	Eukaryotic translation initiation factor 3 subunit B	1.23373	0.37384	No	0.0977679	0.0549129	No	0.188839	0.220636	No	6.16643	6.53638	6.03381	5.60325	5.76661	5.35059	5.93351	5.88405	5.51272	5.55641	6.14665	5.20062	5.73261	6.2565	5.96601	5.82271	5.53271	NaN	6.165	6.18935	5.59532	6.16754	6.38622	5.5993	NaN	NaN	5.93257	NaN	5.47975	6.12341	5.15941	NaN	5.65302	5.73585
EIF3CL	B5ME19	EIFCL	Eukaryotic translation initiation factor 3 subunit C-like protein	0.259449	0.208634	No	0.251534	0.158942	No	0.306916	1.01186	No	6.62851	5.92424	6.88081	7.05218	6.68718	5.57755	6.8392	6.50763	6.6353	6.57006	7.30037	NaN	6.53872	6.73872	7.00126	7.21167	6.66645	NaN	7.25482	6.63892	6.33377	7.10208	7.40087	6.74492	NaN	5.99699	6.52286	NaN	5.39833	6.72374	5.90027	NaN	NaN	NaN
EIF3D	O15371	EIF3D	Eukaryotic translation initiation factor 3 subunit D	0	NaN	No	0	-0.184709	No	NaN	0	No	NaN	NaN	NaN	NaN	NaN	NaN	NaN	3.60296	NaN	NaN	5.96532	NaN	NaN	7.07297	NaN	NaN	NaN	NaN	NaN	7.25768	NaN	NaN	NaN	NaN	NaN	NaN	NaN	NaN	NaN	NaN	NaN	NaN	NaN	NaN
EIF3F	O00303	EIF3F	Eukaryotic translation initiation factor 3 subunit F	0.00380241	0.00217209	No	0.645993	0.364288	No	0.897654	0.460587	No	7.43873	6.61134	6.90976	7.16019	6.70008	7.90931	6.52704	6.88189	6.5278	6.96321	7.72395	6.37267	6.23007	7.11931	6.07534	6.20029	6.68089	NaN	5.46311	6.68749	6.35778	6.33825	7.55785	6.78069	NaN	6.89157	6.34645	5.49711	6.50136	6.48046	5.90993	6.87419	5.8782	NaN
EIF3H	O15372	EIF3H	Eukaryotic translation initiation factor 3 subunit H	0.0164991	0.0313659	No	0.55489	0.400738	No	0.034561	-0.131995	No	7.11445	5.39575	5.83204	7.33827	6.56355	5.21021	5.0318	7.52428	6.75688	7.56407	7.65929	NaN	7.29205	7.27279	NaN	7.41947	6.70006	NaN	7.59457	6.4189	5.93733	7.32713	7.40878	5.03837	6.81828	NaN	6.83705	NaN	NaN	6.26358	NaN	NaN	5.87583	NaN
EIF3I	Q13347	EIF3I	Eukaryotic translation initiation factor 3 subunit I	0.639515	-0.570137	No	0.221241	0.104056	No	1.31059	0.186049	No	7.10568	4.64755	6.22613	6.71086	6.88026	6.71947	6.52386	6.95913	6.5464	7.6723	7.21761	6.61409	6.98144	6.45622	6.7258	6.37461	6.68198	6.93268	7.06918	6.35532	7.08725	5.61902	6.65061	6.82973	6.41426	6.0301	5.6633	6.8909	6.47888	6.62936	NaN	NaN	NaN	NaN
EIF3J	O75822	EIF3J	Eukaryotic translation initiation factor 3 subunit J	0.0856637	0.20735	No	0	NaN	No	0	NaN	No	6.10674	NaN	3.58491	2.97189	NaN	5.18153	NaN	NaN	3.48239	3.45797	NaN	NaN	NaN	NaN	NaN	NaN	NaN	NaN	NaN	NaN	NaN	4.38017	5.69482	NaN	NaN	NaN	NaN	NaN	NaN	NaN	NaN	NaN	NaN	NaN
EIF3K	Q9UBQ5	EIF3K	Eukaryotic translation initiation factor 3 subunit K	0.281026	0.0738753	No	0.125678	0.107122	No	1.16874	0.465232	No	6.66412	6.12903	6.04477	6.22715	6.23115	6.24847	6.03244	5.94067	6.23267	6.4726	6.62808	5.59043	5.71152	6.60995	6.40743	6.42341	5.82416	NaN	6.54456	6.50912	5.65214	6.7148	6.2647	6.60312	5.75424	5.81612	5.69323	5.59492	5.68887	5.59606	5.22237	5.45364	5.84433	NaN
EIF4A1	P60842	IF4A1	Eukaryotic initiation factor 4A-I	0.841005	-0.223002	No	0.117325	-0.0786771	No	0.176527	0.223716	No	7.48561	7.85785	8.11808	7.40619	8.56196	8.10241	7.88217	8.27901	7.78137	8.49974	7.80156	7.06051	7.46506	7.98265	7.57547	7.67387	7.52273	6.52647	8.62634	8.05629	7.8781	7.42125	7.83435	8.30528	8.01427	6.72427	8.04188	6.75824	7.84921	7.84378	6.69321	6.21989	6.95674	8.77316
EIF4A2	Q14240	IF4A2	Eukaryotic initiation factor 4A-II	0.164123	-0.0805653	No	0.118483	0.0454796	No	0.979583	0.297653	No	10.1874	10.6025	10.6485	9.47547	10.1652	10.2649	10.6661	10.3777	10.2367	9.93648	10.2712	9.41302	10.3519	9.45546	10.1993	10.4442	10.2516	9.56774	9.87855	9.92542	9.81849	10.4204	9.91595	10.136	10.2975	10.0766	9.96643	9.92638	9.56465	10.5375	9.91895	9.37275	9.63101	9.50818
EIF4A3	P38919	IF4A3	Eukaryotic initiation factor 4A-III	2.0442	1.6593	Yes	2.85766	1.38301	Yes	1.81374	0.875509	Yes	8.79035	8.60432	8.18286	7.16108	6.85737	7.33037	6.42833	6.16083	NaN	5.87815	8.33262	NaN	8.32162	8.20604	7.0526	7.65511	6.59783	NaN	6.60959	6.92108	6.27825	6.24617	7.33549	6.86541	8.19767	8.47893	7.93599	8.19293	6.22908	6.81091	6.99064	NaN	7.10376	7.01556
EIF4B	P23588	IF4B	Eukaryotic translation initiation factor 4B	0.919423	0.597853	No	0.200446	-0.0775771	No	0.671161	-0.259013	No	8.85788	9.62736	8.92213	8.45258	8.61172	7.07325	9.1527	8.58497	8.38077	8.29072	8.50376	8.53859	8.81993	8.55879	8.7856	9.02775	8.99123	8.81096	8.9618	8.85606	8.28671	8.79313	7.9763	8.32513	8.09942	8.70019	8.58872	8.72627	8.19752	8.61905	8.9844	8.7099	9.14219	8.31705
EIF4G1	Q04637	IF4G1	Eukaryotic translation initiation factor 4 gamma 1	0.558138	0.126056	No	0.15656	0.0796633	No	0.810748	0.200456	No	6.76539	7.2894	7.49756	7.1747	6.94328	6.50373	7.39463	7.08467	7.02553	7.0315	7.37165	6.49428	7.08775	7.56491	7.12468	7.39065	6.45926	6.50392	7.63719	7.56503	7.15414	7.23639	6.82129	7.394	6.4972	7.24683	7.47271	7.23969	6.80096	7.22708	6.77697	6.76354	7.04992	6.85052
EIF4G2	P78344	IF4G2	Eukaryotic translation initiation factor 4 gamma 2	0	NaN	No	0	NaN	No	0	NaN	No	6.56678	NaN	NaN	NaN	NaN	NaN	6.9065	6.8179	NaN	6.4513	NaN	NaN	NaN	6.45625	6.40385	NaN	NaN	NaN	6.61824	NaN	NaN	7.07365	NaN	NaN	NaN	NaN	NaN	NaN	NaN	NaN	6.21157	NaN	NaN	NaN
EIF4G3	O43432	IF4G3	Eukaryotic translation initiation factor 4 gamma 3	0.113426	-0.252348	No	0.999781	0.232444	No	0.0460766	-0.0138769	No	6.11309	3.74284	6.65055	6.43866	6.19865	4.47698	6.97417	6.18484	6.52729	6.24224	6.99844	5.96686	NaN	7.01704	6.75587	7.06551	6.84323	5.7044	5.81032	6.44561	6.86105	6.78723	6.31297	6.60733	NaN	NaN	7.06426	7.09354	6.41388	NaN	6.10897	NaN	6.99111	NaN
EIF4H	Q15056-2	IF4H	Eukaryotic translation initiation factor 4H	1.073	0.133658	No	1.04965	0.0811369	No	0.62027	0.20934	No	8.52915	9.01391	8.92512	8.82865	8.89945	8.41698	9.02623	8.57868	8.73327	8.77283	8.67116	8.15376	8.53512	9.15379	8.78475	9.39486	8.49509	8.18435	8.38087	9.04948	8.82714	9.26968	8.56267	8.47445	8.08224	7.9713	9.28572	9.06095	8.28138	8.72623	8.31692	7.56657	8.96027	8.32992
EIF5	P55010	IF5	Eukaryotic translation initiation factor 5	2.00007	0.308262	No	0.0113545	0.00650454	No	0.122651	0.112284	No	7.23398	7.2906	6.79706	6.09587	5.96771	6.97432	7.11003	6.61699	5.69932	5.44323	6.49454	NaN	6.95561	6.75368	6.96395	7.55405	6.95843	5.75569	6.92999	6.9907	6.91994	6.89025	7.16626	6.50785	NaN	7.2261	7.24251	7.58832	6.91027	7.38533	6.75071	6.38794	7.66301	6.82307
EIF5A	P63241	IF5A1	Eukaryotic translation initiation factor 5A-1	0.477354	0.277956	No	0	0.744986	No	0	NaN	No	5.11249	NaN	5.82068	5.75789	5.46422	4.60149	4.67493	NaN	5.27398	5.62526	5.47986	NaN	NaN	5.68319	NaN	NaN	NaN	NaN	NaN	4.93821	NaN	3.39534	5.64413	4.80513	NaN	5.27758	NaN	NaN	NaN	NaN	NaN	NaN	NaN	NaN
EIF6	P56537	IF6	Eukaryotic translation initiation factor 6	0.153354	0.173058	No	0.0306956	-0.0573126	No	1.30517	1.22326	Yes	8.87456	8.17834	10.1042	10.2812	9.8312	8.15642	NaN	10.0481	9.41906	10.7753	9.81941	10.4158	7.66992	9.37236	8.24297	9.10348	8.22887	NaN	9.04261	8.67689	9.91695	8.62941	9.15722	10.6575	NaN	9.13295	10.1734	8.16593	8.4393	8.6271	NaN	7.23726	8.43155	8.43546
ELAVL1	Q15717	ELAV1	ELAV-like protein 1	3.47575	1.24199	Yes	2.73812	1.36199	Yes	4.61839	1.51844	Yes	8.49018	8.6944	8.59936	7.72598	8.08626	7.11268	7.17774	7.36752	6.86043	6.86788	8.27959	8.17113	8.67138	8.17159	7.51539	8.88639	6.63216	5.94874	7.13921	7.39555	6.71631	7.69158	7.81411	8.44007	7.88407	8.10165	7.82194	7.79547	6.25886	7.27759	6.5263	6.29064	6.37058	6.02272
ELAVL3	Q14576	ELAV3	ELAV-like protein 3	1.25495	1.63455	No	0	NaN	No	0	NaN	No	5.7214	5.09673	6.72589	5.12423	5.96043	NaN	NaN	4.3122	4.05375	4.54094	5.30292	NaN	6.04279	5.7152	6.00377	6.34114	NaN	NaN	NaN	NaN	NaN	NaN	4.93952	5.90519	5.5146	NaN	4.51568	NaN	NaN	NaN	NaN	NaN	NaN	NaN
ELAVL4	P26378	ELAV4	ELAV-like protein 4	2.74826	0.97953	Yes	3.74578	1.46948	Yes	2.73465	1.47551	Yes	8.93164	9.22866	9.38768	8.48053	8.83641	8.16902	8.1264	7.94916	7.76021	7.96247	9.40836	8.77865	9.50738	8.97883	8.55484	9.60366	7.90724	7.25647	7.36221	7.72247	7.41333	8.35309	8.8862	9.0539	8.76854	8.94617	8.97342	8.69419	6.89651	7.95369	8.0482	6.57754	7.61298	7.38044
ELFN2	Q5R3F8	PPR29	Protein phosphatase 1 regulatory subunit 29	0.0214996	0.0337886	No	0.199646	0.115963	No	0	-0.427254	No	NaN	7.52214	7.12508	6.47335	6.93063	NaN	6.03282	7.32285	7.40237	7.15802	NaN	5.69725	6.81436	6.28333	7.10503	6.48746	NaN	NaN	6.18779	6.25477	6.87526	6.90851	6.17997	NaN	NaN	NaN	6.2875	5.41402	NaN	NaN	6.64915	NaN	6.71475	NaN
ELMO2	Q96JJ3	ELMO2	Engulfment and cell motility protein 2	1.50502	-0.515248	No	0.992798	-0.25746	No	0.0759064	0.0293723	No	5.99968	7.24493	7.25782	6.3505	6.75919	6.89466	7.87536	7.24943	6.69385	7.47506	6.4797	NaN	6.45095	7.23532	6.72607	7.09916	7.18182	NaN	6.5397	7.43373	6.72917	7.39407	6.93937	6.51242	NaN	NaN	6.74238	6.94037	7.11022	6.2509	7.11639	NaN	6.97234	6.68359
EMC2	Q15006	EMC2	ER membrane protein complex subunit 2	0.147494	0.0615721	No	0.585013	0.275104	No	0.652706	0.386976	No	NaN	5.78395	6.29428	7.08228	6.5009	6.27164	6.12279	6.3023	6.80187	6.18816	6.96258	NaN	6.70009	6.20713	NaN	7.07759	NaN	NaN	6.60052	6.11011	6.48992	6.44886	6.4116	6.49286	NaN	NaN	6.98903	6.29239	6.43142	6.05357	NaN	NaN	6.24756	NaN
EMD	P50402	EMD	Emerin	0.125333	0.0447863	No	0.146151	-0.0678434	No	0.445216	0.16478	No	7.17	7.24699	7.71163	7.47578	8.17942	6.73672	7.50713	7.60245	7.70902	8.00458	NaN	NaN	7.21382	7.58056	7.45983	7.84147	6.39608	6.39664	7.64658	7.46536	7.71748	7.53762	7.77466	7.54031	NaN	NaN	7.9162	7.10126	7.4171	7.0497	NaN	NaN	7.98959	7.21692
ENDOD1	O94919	ENDD1	Endonuclease domain-containing 1 protein	1.25989	-0.69838	No	0.401463	-0.211848	No	0.199206	-0.13137	No	5.95855	5.5242	6.90893	6.85075	7.32898	7.45823	6.56384	7.2731	6.86515	7.90299	6.24759	6.81665	5.9805	6.51328	6.54011	6.48495	6.34401	NaN	6.67429	5.92515	6.87104	7.01119	6.58957	7.63253	6.31785	6.32877	6.7869	6.62744	7.26322	7.41101	6.84123	5.37348	6.9321	7.25025
ENO1	P06733	ENOA	Alpha-enolase	0.981732	-0.248266	No	0.433155	0.0466297	No	0.0684356	0.0272462	No	11.8681	11.9703	12.2251	12.0744	11.7629	12.3451	12.4385	12.1167	12.1203	12.1216	11.685	11.7949	11.7617	11.8866	11.8347	11.6387	11.7149	11.574	11.8484	11.7441	11.7874	11.6531	12.4945	11.8978	11.2285	11.4407	11.2473	11.5182	12.496	11.8727	11.8115	11.1268	10.8469	11.5098
ENO2	P09104	ENOG	Gamma-enolase	0.226957	-0.0626005	No	0.485218	-0.112677	No	1.14014	-0.285109	No	12.5969	13.3623	13.1186	12.7918	12.99	12.6421	13.4784	12.9845	13.2332	12.8344	12.457	11.9864	12.8741	12.7224	13.0956	12.7757	12.6078	12.3399	12.7483	13.0586	12.8293	13.0034	12.5357	11.7601	11.962	11.9431	12.3438	12.305	12.7727	12.3264	12.5377	12.0998	12.7573	12.0664
ENO3	P13929	ENOB	Beta-enolase	0.0610254	-0.0337097	No	1.04317	-0.332862	No	0.41021	0.540892	No	7.93786	8.36049	8.85237	9.26735	8.98947	8.14467	8.62547	8.97054	8.54461	9.2908	8.08626	8.69924	7.63975	7.78598	8.12578	7.77542	NaN	NaN	7.59283	8.22052	8.48429	8.36076	9.21708	8.78614	6.22725	7.99782	7.73587	NaN	9.44504	7.70601	6.70431	NaN	5.94741	NaN
ENOPH1	Q9UHY7	ENOPH	Enolase-phosphatase E1	0.010989	0.0109377	No	0.109823	-0.106032	No	0	NaN	No	NaN	5.42752	4.91992	4.68018	5.09174	NaN	5.00427	4.98744	5.54684	4.53704	4.91558	NaN	5.56528	5.10993	5.14628	NaN	5.57585	NaN	5.63595	5.6483	4.30109	5.23462	5.29845	NaN	NaN	NaN	NaN	NaN	NaN	3.31401	5.0005	NaN	NaN	NaN
ENPP6	Q6UWR7	ENPP6	Glycerophosphocholine cholinephosphodiesterase ENPP6	0	NaN	No	NaN	0	No	0	NaN	No	NaN	NaN	NaN	NaN	NaN	NaN	4.15603	2.71443	3.86767	4.91208	NaN	NaN	NaN	NaN	NaN	NaN	NaN	NaN	NaN	NaN	NaN	NaN	NaN	NaN	NaN	NaN	NaN	NaN	NaN	NaN	5.70851	NaN	NaN	NaN
EPB41L1	Q9H4G0	E41L1	Band 4.1-like protein 1	1.98251	-0.315536	No	1.15955	-0.168696	No	1.64671	-0.451628	No	8.5229	8.9327	8.89265	8.83775	8.87115	9.01939	9.33344	9.06854	9.2097	9.00376	8.47913	7.97565	8.71874	8.70147	8.87168	9.12642	8.77265	8.28748	8.63385	9.06542	8.94204	9.18382	8.17208	8.37897	8.01502	7.67106	8.13486	8.62069	8.72969	8.90444	8.66619	8.10096	8.8854	8.41578
EPB41L2	O43491-4	E41L2	Band 4.1-like protein 2	0.275105	-0.115104	No	0.45176	-0.109208	No	0.43054	-0.235674	No	6.61472	6.96489	7.40705	7.06023	7.28622	7.24529	7.17538	7.63229	6.72205	7.13361	6.9806	6.72521	7.3614	7.27726	7.23965	7.69599	7.32101	6.4482	7.53721	7.65099	7.10334	7.87461	7.42384	7.33819	6.78396	6.82398	7.01349	7.68677	7.35123	8.14409	7.06496	7.76643	7.1236	7.03397
EPB41L3	Q9Y2J2	E41L3	Band 4.1-like protein 3	1.32459	-0.324238	No	1.81801	-0.283182	No	1.39084	-0.401426	No	9.71592	10.2046	10.343	9.95971	10.3938	10.0204	10.8231	10.5423	10.482	10.3705	9.48398	9.1586	9.9782	9.84608	10.0856	10.4027	10.012	9.5929	9.97707	10.1867	10.3182	10.5674	9.61957	9.52975	9.05319	9.26512	9.43473	9.96923	10.0088	9.99216	9.92002	9.60412	10.0079	9.74714
EPDR1	Q9UM22	EPDR1	Mammalian ependymin-related protein 1	0.451194	0.597235	No	0	NaN	No	0	NaN	No	11.0159	NaN	11.5041	NaN	10.8805	NaN	NaN	10.5359	10.5167	10.6542	12.0079	NaN	NaN	NaN	NaN	NaN	NaN	NaN	NaN	NaN	NaN	10.4399	NaN	NaN	NaN	NaN	10.7878	NaN	NaN	NaN	NaN	NaN	NaN	NaN
EPHA4	P54764	EPHA4	Ephrin type-A receptor 4	2.37612	-0.431009	No	1.20921	-0.127872	No	1.66306	-0.456434	No	8.77274	9.24434	9.05715	9.16275	8.9632	9.38101	9.59719	9.41254	9.76132	9.20316	8.37732	8.58043	8.79587	9.2508	9.07952	9.34257	8.6737	8.83255	8.88849	9.20944	9.22528	9.36429	8.4905	8.65208	8.22153	7.72613	8.80116	8.32427	9.23636	8.56339	8.78098	8.49163	8.98158	8.90036
EPHX1	P07099	HYEP	Epoxide hydrolase 1	0.961883	-0.513465	No	0.113665	-0.0601714	No	0.0677744	-0.0228105	No	6.78296	6.06884	7.58141	7.15344	6.59187	6.98924	7.53181	7.82985	7.24129	7.15367	6.56451	5.72642	6.40083	7.30193	6.96905	6.94491	6.89	6.31739	6.82939	6.63448	6.92093	6.67649	7.09006	7.22611	NaN	6.23474	6.96929	6.88327	7.20365	7.34362	6.40169	6.37744	6.52491	7.06791
EPM2AIP1	Q7L775	EPMIP	EPM2A-interacting protein 1	0.754083	1.20566	No	0	1.02893	No	0	NaN	No	6.28948	6.09647	6.87333	NaN	NaN	5.93241	5.16804	4.54187	5.66998	5.09071	6.95926	NaN	NaN	NaN	6.50344	5.71038	NaN	NaN	NaN	5.12571	5.47451	NaN	NaN	6.44566	NaN	NaN	6.99791	6.61763	NaN	NaN	NaN	NaN	NaN	NaN
EPN1	Q9Y6I3	EPN1	Epsin-1	0.461245	-0.113958	No	1.19093	-0.183577	No	0.617604	-0.285453	No	7.45094	8.17159	7.41357	7.6863	7.31329	7.89787	8.25817	7.49601	7.46626	7.48717	7.55245	6.97759	7.25666	7.9125	7.1869	7.69463	7.64543	7.47067	7.28224	8.25702	7.23286	7.79396	6.97818	6.8889	6.88467	7.18526	7.31197	7.79119	7.22164	7.5155	7.56435	7.19692	8.07578	7.1787
EPPK1	P58107	EPIPL	Epiplakin	0.193917	-0.310548	No	0.19163	0.16549	No	0.931598	0.695789	No	8.59598	7.4195	7.70904	8.41006	7.46715	8.53823	7.5578	7.82042	7.20994	10.0281	8.51866	8.82255	6.58187	8.01677	6.77384	6.77893	7.85385	7.52857	6.83966	7.44529	7.74809	7.08423	8.47547	8.96427	7.66206	8.03641	8.4079	6.91487	7.98719	7.63751	7.04171	7.33176	6.5589	7.72919
EPRS1	P07814	SYEP	Bifunctional glutamate/proline--tRNA ligase	0.618066	0.16201	No	0.618038	0.313177	No	1.98103	0.612418	Yes	7.7624	7.75025	7.96599	8.01893	7.50412	7.54235	7.7784	7.70437	7.50344	7.66308	8.04855	7.33106	7.35346	7.83298	7.51743	7.99556	6.84703	6.926	7.9507	7.39548	7.33843	7.74233	8.04789	7.69939	7.58112	7.898	7.68919	7.51093	7.28681	7.5049	7.49994	6.99098	6.90658	6.56281
EPS15L1	Q9UBC2	EP15R	Epidermal growth factor receptor substrate 15-like 1	1.06071	-0.298141	No	0.866998	-0.236083	No	0.128194	-0.0914372	No	6.57411	7.17543	7.41725	6.90931	7.29828	6.4528	7.68413	7.63736	7.55267	7.53813	6.81512	6.32427	7.20513	7.20946	7.14656	7.29003	7.59064	6.32078	7.30378	7.34876	7.62467	7.21842	7.05556	7.12453	NaN	NaN	6.97633	6.87374	6.92807	6.64261	6.63712	5.8933	7.24645	7.57876
EPS8L1	Q8TE68	ES8L1	Epidermal growth factor receptor kinase substrate 8-like protein 1	0.0919219	0.125232	No	0	0.15467	No	0	2.99609	No	NaN	NaN	5.4444	6.08791	5.95503	6.22755	0.960111	5.88234	5.06054	6.16876	4.54602	5.88022	NaN	5.01721	NaN	NaN	NaN	NaN	7.43287	4.86255	6.51267	3.42368	NaN	7.44651	5.83497	NaN	5.59034	NaN	NaN	4.45042	NaN	NaN	NaN	NaN
EPS8L2	Q9H6S3	ES8L2	Epidermal growth factor receptor kinase substrate 8-like protein 2	0	-2.44826	No	0	NaN	No	0	NaN	No	NaN	NaN	NaN	NaN	3.51995	NaN	NaN	NaN	NaN	5.96821	NaN	NaN	NaN	3.99606	NaN	NaN	NaN	NaN	6.53081	NaN	3.9489	NaN	NaN	NaN	NaN	NaN	NaN	NaN	NaN	NaN	NaN	NaN	NaN	6.39724
ERC2	O15083	ERC2	ERC protein 2	0.906326	-0.530177	No	0.809071	-0.209977	No	0.365206	-0.136739	No	7.9166	7.16533	8.00016	8.30667	7.86098	7.68063	8.63995	8.48501	8.75346	8.34159	7.33033	6.91126	7.58891	8.61732	8.15979	8.12453	7.89984	7.42815	7.62143	8.50844	8.05935	8.47478	7.95625	7.64701	NaN	7.03722	8.22869	7.22958	7.84405	7.37771	7.4813	7.23192	8.46293	7.86583
ERH	P84090	ERH	Enhancer of rudimentary homolog	1.95365	1.02386	Yes	3.98781	0.672394	Yes	1.79168	0.562056	No	8.27265	8.88119	7.87331	7.42258	8.06863	7.17351	7.62328	6.2055	7.123	7.27375	7.98352	7.64834	8.31586	8.38406	7.67964	8.13464	7.26865	7.06237	7.57629	7.72116	6.79519	7.68804	7.61243	8.333	7.67333	8.09035	7.28907	6.90332	6.88662	8.11196	7.22102	6.82875	6.84179	6.63901
ERLIN1	O75477	ERLN1	Erlin-1	0	NaN	No	0	0.210635	No	0	NaN	No	NaN	NaN	NaN	NaN	NaN	NaN	NaN	8.35464	8.74858	8.40934	NaN	NaN	NaN	NaN	NaN	8.99372	NaN	NaN	NaN	NaN	8.43585	8.78308	NaN	NaN	NaN	NaN	8.29785	NaN	NaN	NaN	NaN	NaN	NaN	NaN
ERO1A	Q96HE7	ERO1A	ERO1-like protein alpha	0	-0.352721	No	0	0.481901	No	0	NaN	No	NaN	4.62055	5.75412	5.73786	6.37865	NaN	4.97327	NaN	NaN	NaN	6.07517	NaN	NaN	6.15224	NaN	6.68149	NaN	NaN	9.52207	NaN	NaN	6.19958	NaN	5.97221	NaN	NaN	NaN	NaN	NaN	NaN	NaN	NaN	NaN	NaN
ERP29	P30040	ERP29	Endoplasmic reticulum resident protein 29	0.578394	0.416704	No	0.749071	0.0907416	No	0.348732	0.201545	No	7.75513	6.9556	7.85666	7.34931	7.20619	6.41351	7.38439	7.28285	6.58314	7.37548	7.28889	7.3706	6.71679	6.54798	6.90466	7.69571	NaN	NaN	6.77318	6.4528	6.75623	7.51996	7.75879	7.73907	7.83392	6.87452	6.93144	7.0395	6.85238	7.4113	7.96929	7.36835	NaN	6.63676
ERP44	Q9BS26	ERP44	Endoplasmic reticulum resident protein 44	0.393575	0.246802	No	1.45265	0.571492	No	3.35549	0.979334	Yes	8.13259	6.73865	8.31643	8.50561	7.87992	7.50789	7.48461	7.66023	7.94992	7.73655	8.28719	7.18881	8.15757	8.33612	7.96445	8.90596	6.94435	6.4669	8.05722	8.0094	7.86625	8.06703	8.27018	8.14526	7.69284	7.82931	8.00453	7.36642	7.07834	7.45436	6.92198	6.50147	6.79891	6.67746
ESD	P10768	ESTD	S-formylglutathione hydrolase	0.869953	-0.363897	No	0.0603945	-0.0201139	No	0.398512	-0.200723	No	7.49752	8.11532	8.31015	6.90609	8.50347	7.5685	8.24948	8.74538	8.00174	8.58693	7.36339	6.67077	7.54743	7.67227	7.69437	7.96689	7.00574	6.64477	7.87898	7.40087	7.88653	8.21892	8.1928	7.64914	NaN	6.38259	6.70193	7.24186	8.41373	8.31856	7.40046	5.80456	7.18774	7.44734
ETF1	P62495	ERF1	Eukaryotic peptide chain release factor subunit 1	0	0.406325	No	0	0.735517	No	0	0.640438	No	7.01864	NaN	NaN	NaN	NaN	6.61231	5.28869	NaN	NaN	NaN	7.17815	NaN	NaN	7.7453	NaN	NaN	NaN	NaN	NaN	7.00978	NaN	NaN	7.2209	6.7533	NaN	6.22886	NaN	NaN	6.58047	NaN	NaN	NaN	NaN	NaN
ETFA	P13804	ETFA	Electron transfer flavoprotein subunit alpha, mitochondrial	0.848928	-0.264884	No	0.0221335	0.00641203	No	0.0783855	0.0372252	No	8.14817	7.84843	8.37549	7.76528	7.97391	8.33211	8.55682	8.37332	8.24787	7.92557	7.69652	6.89761	7.71766	8.20136	7.85201	7.81851	7.62916	7.239	7.69296	7.82639	7.79158	7.96611	7.82287	7.85869	6.90111	7.76203	7.04995	7.93474	7.86486	7.93789	7.41866	7.06407	7.18443	7.63612
ETFB	P38117	ETFB	Electron transfer flavoprotein subunit beta	0.119924	-0.0366194	No	0.697967	-0.165738	No	0.556735	-0.210182	No	10.6917	10.6584	10.6853	10.4483	10.2682	10.9614	10.7875	10.3882	10.6808	10.117	10.0872	10.1369	10.3369	10.4048	10.8303	10.4547	10.4821	10.3751	10.3612	10.8758	10.5398	10.6112	10.2823	10.3786	9.98616	10.6027	9.79953	10.8874	10.3175	10.9658	10.6536	10.3764	10.2831	10.6016
ETFDH	Q16134	ETFD	Electron transfer flavoprotein-ubiquinone oxidoreductase, mitochondrial	0	-0.75549	No	0	NaN	No	NaN	0	No	NaN	NaN	NaN	6.41067	NaN	NaN	NaN	3.55436	7.16616	NaN	NaN	NaN	NaN	5.74265	NaN	NaN	NaN	NaN	NaN	NaN	NaN	7.21299	NaN	NaN	NaN	NaN	NaN	NaN	NaN	NaN	NaN	NaN	NaN	NaN
ETHE1	O95571	ETHE1	Persulfide dioxygenase ETHE1, mitochondrial	0.541871	-0.228192	No	0.250745	-0.117392	No	0.0582987	0.0206397	No	7.3088	6.44137	7.03921	7.12041	6.79271	7.48206	7.3348	6.78007	7.26134	6.98519	6.45105	5.66885	6.91555	7.21948	6.78838	6.96537	7.00661	NaN	7.28271	6.71341	7.02129	6.90278	6.19988	6.94156	6.84186	6.11169	6.86804	7.33669	6.33965	7.2047	6.49689	NaN	6.98936	7.05423
EVPL	Q92817	EVPL	Envoplakin	0.00730403	0.00800734	No	0.388286	-0.931937	No	2.15295	0.968944	Yes	5.79547	5.48883	6.36862	7.52312	7.01073	6.12836	6.19391	6.06225	6.24466	7.51756	6.80259	7.24017	5.63878	6.55894	5.70872	6.13115	5.82238	NaN	10.2275	6.08678	7.30791	6.0553	7.03307	7.8998	6.25194	5.0776	7.29627	6.56447	6.28172	6.61356	5.62147	NaN	5.74229	5.94179
EWSR1	Q01844	EWS	RNA-binding protein EWS	0	NaN	No	0	NaN	No	0	NaN	No	6.24536	NaN	NaN	NaN	NaN	NaN	4.5286	NaN	NaN	NaN	5.59894	NaN	NaN	6.38637	NaN	NaN	NaN	NaN	NaN	NaN	NaN	NaN	6.22636	NaN	NaN	NaN	NaN	NaN	NaN	NaN	NaN	NaN	NaN	NaN
EXOC1	Q9NV70	EXOC1	Exocyst complex component 1	0.9236	-0.239127	No	0.675453	0.120371	No	0.0925915	0.0836232	No	6.34097	6.54705	6.53121	6.03965	6.20232	6.69078	7.10473	6.41224	6.3984	6.25069	6.52859	6.2674	6.60701	6.60233	6.53146	6.7535	6.23965	5.81815	6.61405	6.6783	6.44773	6.77019	6.76248	6.42686	6.04514	6.06044	6.53516	6.68312	6.62198	6.88527	6.58281	6.67309	5.99907	5.24923
EXOC4	Q96A65	EXOC4	Exocyst complex component 4	0.0961728	-0.0348315	No	0.259181	0.0826447	No	0.0437704	-0.0105288	No	6.2254	6.16729	5.68955	5.81392	5.71845	5.79863	6.09334	5.95376	6.01214	5.93089	6.0821	NaN	5.42146	5.95667	5.39728	5.98033	5.53235	NaN	5.48122	6.13311	5.26192	6.01602	5.55628	6.19153	NaN	5.19761	5.35158	NaN	5.66954	5.96697	5.81675	5.23535	5.46727	5.06899
EXOC8	Q8IYI6	EXOC8	Exocyst complex component 8	0.0175277	-0.0762559	No	0	NaN	No	0	NaN	No	NaN	5.07154	3.30442	NaN	NaN	NaN	3.92208	4.60638	NaN	4.99001	NaN	NaN	NaN	7.96334	NaN	NaN	NaN	NaN	7.26275	NaN	NaN	NaN	NaN	NaN	NaN	NaN	7.15502	NaN	NaN	6.82287	NaN	NaN	NaN	NaN
EXOG	Q9Y2C4	EXOG	Nuclease EXOG, mitochondrial	0	-0.72795	No	NaN	0	No	NaN	0	No	NaN	NaN	5.04108	NaN	NaN	NaN	5.3254	5.76903	NaN	5.17551	NaN	NaN	NaN	NaN	NaN	NaN	NaN	NaN	NaN	NaN	NaN	NaN	NaN	NaN	NaN	NaN	NaN	NaN	NaN	NaN	NaN	NaN	NaN	NaN
EZR	P15311	EZRI	Ezrin	0.841786	-0.198449	No	0.192838	-0.0975445	No	0.145454	0.0311467	No	8.81431	8.90103	8.90055	8.97952	8.86168	9.36712	9.00895	8.94116	8.9311	9.20101	8.94237	8.34526	8.54732	8.98318	8.67005	9.18978	8.63067	8.11092	9.52356	8.77475	8.90873	9.3146	9.31327	9.19709	8.64501	8.26328	8.88402	9.00446	9.20295	9.22266	8.70228	8.53793	8.57912	8.87531
F2	P00734	THRB	Prothrombin	2.11055	-0.177804	No	0.000836509	-0.000404835	No	0.327438	-0.0957997	No	7.0247	8.09117	7.90831	7.62065	7.33874	7.13467	8.24537	8.05185	7.7853	7.65541	7.82842	6.91149	7.82908	7.91998	8.09217	7.59117	8.01655	7.61114	7.6603	7.65277	7.72676	7.50723	6.86497	6.95057	7.05223	7.8859	7.41958	7.64882	6.92118	7.13217	7.48777	7.81411	7.7776	7.26404
F8A1	P23610	HAP40	40-kDa huntingtin-associated protein	3.34309	-0.688893	No	0.792099	-0.620612	No	0	-0.0371404	No	5.70571	5.49545	5.15201	4.86103	4.69729	6.41543	6.34348	5.88314	5.56683	5.14706	5.01687	NaN	4.31859	5.69907	5.84013	4.03144	NaN	NaN	4.96055	5.97361	5.85587	5.58164	5.07506	NaN	NaN	NaN	NaN	NaN	5.1122	NaN	5.22716	NaN	5.93193	NaN
FABP3	P05413	FABPH	Fatty acid-binding protein, heart	1.13461	-0.404063	No	0.77937	-0.179841	No	0.274186	-0.154017	No	10.3762	10.9561	11.3964	10.3625	10.6769	10.7584	11.4975	11.6416	11.2959	10.5949	10.3823	10.4255	11.2449	10.5206	10.4962	10.7079	10.6745	10.9024	10.9105	10.7576	10.7042	10.907	10.1439	9.47689	10.1016	10.572	10.1754	9.90736	10.5354	9.90147	10.8985	10.7644	10.1399	9.06159
FABP5	Q01469	FABP5	Fatty acid-binding protein 5	0.373947	-0.481579	No	0.112575	0.195232	No	0.486177	0.630761	No	7.11566	7.68826	8.99493	9.38863	10.2829	9.51878	8.44456	8.71155	8.68023	10.5232	8.72343	9.80283	8.20306	8.53868	8.05942	8.09511	7.66232	7.04916	9.73161	8.768	9.18037	7.85969	9.06314	10.5475	8.6923	8.54429	10.1032	7.76412	9.65666	8.94226	7.50807	7.77995	7.79041	9.25263
FABP7	O15540	FABP7	Fatty acid-binding protein, brain	0.131321	-0.0824934	No	0.406417	-0.275776	No	0.0885976	-0.0739308	No	8.0334	7.89179	8.07811	7.84902	7.99237	8.66191	8.43794	8.19155	7.33445	7.6313	7.48469	7.18475	7.78807	7.48348	7.26039	7.42547	8.46491	NaN	7.09332	7.49719	7.87334	7.89222	8.15208	6.76106	8.04599	6.71699	7.65639	7.85554	7.57761	8.098	8.53764	6.22733	7.71035	7.48071
FAH	P16930	FAAA	Fumarylacetoacetase	0.718231	-0.409598	No	0.636758	-0.213696	No	0.193195	-0.0428936	No	6.67944	NaN	6.81791	6.79652	6.78807	6.6051	7.20354	7.86695	7.29744	6.95085	6.50813	6.15911	7.06068	6.79106	6.28361	6.58585	6.72082	6.28876	6.6376	7.0013	7.0345	6.98763	6.56557	6.89515	NaN	6.50818	NaN	7.24061	6.63264	7.06088	6.49859	NaN	NaN	7.13649
FAHD1	Q6P587	FAHD1	Acylpyruvase FAHD1, mitochondrial	0.371364	-0.371566	No	0.312808	0.278033	No	0.00244742	0.00273705	No	6.20843	5.99876	5.01208	6.54624	6.79735	6.11191	5.57686	6.98799	6.86685	6.87707	6.20106	5.97711	NaN	6.22901	6.8943	6.22767	5.52388	NaN	5.87491	6.57472	5.83005	6.51125	6.48622	6.56135	NaN	3.6597	5.66643	NaN	5.80099	6.98038	6.43567	NaN	5.92441	NaN
FAHD2A	Q96GK7	FAH2A	Fumarylacetoacetate hydrolase domain-containing protein 2A	0.2073	-0.0951086	No	0.104262	-0.0659599	No	0.596589	-0.176709	No	8.09985	9.00337	8.1091	6.67586	6.59163	8.22405	8.53682	8.06374	7.2911	6.83964	7.1525	7.7796	7.6368	7.66627	7.37524	8.08121	8.04987	7.53704	7.44801	7.7592	7.88675	7.40651	7.36691	7.3732	NaN	7.19833	8.00743	7.92206	7.2794	7.91823	7.78496	7.53548	8.25788	7.76049
FAM120A	Q9NZB2	F120A	Constitutive coactivator of PPAR-gamma-like protein 1	2.53371	0.74902	Yes	1.57197	0.849593	Yes	1.32677	1.23927	Yes	6.6084	7.21254	6.32428	6.88475	6.55114	6.00557	6.42291	5.93632	5.85189	5.61932	6.79906	NaN	6.09313	6.6733	6.1656	6.84132	5.01228	NaN	5.39353	6.35732	5.35081	6.21051	6.52439	6.25085	5.56761	NaN	6.84981	5.62689	5.19323	5.10348	NaN	NaN	NaN	NaN
FAM136A	Q96C01	F136A	Protein FAM136A	0.695211	-1.14221	No	0.182547	-0.307633	No	0.641128	-0.479633	No	6.75669	3.97404	5.56718	NaN	5.46218	NaN	6.27902	5.8116	5.7434	6.33942	5.9354	5.34677	NaN	5.46706	NaN	6.25076	NaN	NaN	5.38536	6.28901	6.06359	6.04408	5.90001	5.79712	4.61606	NaN	6.13819	5.61466	5.40689	6.41314	6.20533	4.10278	6.63393	5.80492
FAM171A2	A8MVW0	F1712	Protein FAM171A2	0.573875	0.704761	No	0.809114	-0.472366	No	1.11939	-0.795068	No	6.86936	NaN	5.80455	6.901	6.71546	5.8669	5.79007	5.92066	7.01145	4.67231	NaN	NaN	NaN	7.14166	6.51019	7.21594	NaN	NaN	6.52995	7.5896	7.36058	7.3347	6.18433	NaN	NaN	NaN	6.69796	6.51293	7.07472	6.19403	6.83578	NaN	7.3977	NaN
FAM83H	Q6ZRV2	FA83H	Protein FAM83H	0	0.624884	No	0	NaN	No	0	NaN	No	NaN	NaN	NaN	4.45135	NaN	NaN	NaN	NaN	3.82647	6.10982	NaN	NaN	NaN	NaN	NaN	NaN	NaN	NaN	7.0456	NaN	NaN	NaN	NaN	5.96385	NaN	NaN	NaN	NaN	NaN	NaN	NaN	NaN	NaN	NaN
FARP1	Q9Y4F1	FARP1	FERM, ARHGEF and pleckstrin domain-containing protein 1	0.0532004	-0.0122311	No	0.471533	-0.141944	No	1.09499	-0.459114	No	7.42573	8.50737	7.85664	7.51793	7.63697	7.33664	8.26365	7.93862	7.71508	7.75182	7.65128	6.16171	7.62272	7.67096	7.80921	7.84649	7.95037	6.43824	7.12723	7.83828	8.24715	8.01277	7.08205	6.43345	7.08893	6.24672	7.59247	7.90245	7.3362	7.65365	7.29548	6.92197	8.26859	7.62488
FARSA	Q9Y285	SYFA	Phenylalanine--tRNA ligase alpha subunit	2.48737	0.809706	Yes	1.89117	0.805144	Yes	2.53754	0.968823	Yes	7.9622	8.18798	7.83083	8.1675	7.49884	6.74456	7.19451	7.13327	7.63777	6.88871	8.57498	6.95231	8.18731	8.14839	7.26252	8.74402	6.91067	6.00998	7.22402	7.97195	6.86744	8.05461	8.071	7.47469	7.47649	7.82803	7.93877	7.73254	6.6086	7.18893	6.87522	6.70551	6.83567	6.49465
FARSB	Q9NSD9	SYFB	Phenylalanine--tRNA ligase beta subunit	1.71914	0.357537	No	1.94414	0.485363	No	2.77865	0.922829	Yes	9.39447	9.73233	9.38824	8.83716	8.80314	8.84375	9.24309	9.31567	8.64157	8.32357	9.47287	8.35725	9.22385	8.60293	8.80749	9.78672	8.61602	8.03227	8.61218	8.60387	8.38301	9.09157	9.17043	8.80503	9.04125	9.22272	8.70956	9.19274	8.42223	7.81604	8.75191	8.16061	7.62769	7.82628
FASN	P49327	FAS	Fatty acid synthase	2.52947	-0.476275	No	0.754046	-0.369612	No	0.375008	-0.185335	No	7.6037	7.79784	8.16746	8.03591	7.86042	8.29717	8.32286	8.48235	8.34241	8.40191	7.72407	7.33175	7.73394	8.27241	7.65997	7.86782	7.85892	7.24997	9.02609	8.04515	8.45675	8.17075	7.65555	8.29254	6.87128	7.61108	7.82033	7.25574	7.90086	8.1026	7.8947	7.42087	7.51507	7.78442
FAU	P62861	RS30	FAU ubiquitin-like and ribosomal protein S30	1.90859	0.989741	Yes	0.870857	0.556343	No	2.99312	0.669385	Yes	8.22118	8.37211	7.59352	8.00641	7.55245	6.41958	7.41798	6.54794	7.30058	7.11089	9.17406	6.92747	7.91989	7.33921	8.31809	8.76576	7.23051	6.85414	7.4995	7.61689	7.88072	8.02465	7.73905	7.94285	8.08047	7.63463	8.44248	8.20906	7.0451	7.34668	7.80845	6.9689	7.4436	7.41948
FBL	P22087	FBRL	rRNA 2'-O-methyltransferase fibrillarin	0.390141	0.429334	No	2.15549	0.652482	Yes	0.36793	0.457815	No	7.80052	7.9367	6.98121	6.6603	5.52403	8.02635	NaN	6.21198	5.12508	5.88531	7.4338	NaN	5.91912	6.75604	6.58942	5.64177	NaN	NaN	5.49034	6.15916	5.68752	4.9594	7.51465	6.75055	6.15371	NaN	6.87602	5.50731	NaN	6.65788	NaN	NaN	6.05306	NaN
FBXL16	Q8N461	FXL16	F-box/LRR-repeat protein 16	0.296942	-0.575704	No	2.07176	0.422315	No	0.056031	0.0241793	No	7.11475	4.15528	7.205	6.61655	6.93482	6.15294	7.75475	7.55291	6.46547	6.97886	7.07944	6.16327	7.1204	7.61109	7.28978	6.58973	6.45531	6.12981	6.41409	7.12459	6.86619	6.32983	6.77993	6.24669	NaN	5.34095	6.64055	5.46992	6.6308	6.06756	6.73744	5.59667	NaN	NaN
FBXL8	Q96CD0	FBXL8	F-box/LRR-repeat protein 8	0	0.496521	No	0	0.665813	No	0	NaN	No	NaN	NaN	NaN	6.00651	6.50578	6.90776	5.3914	5.93951	NaN	6.00926	NaN	NaN	5.83415	7.13002	NaN	6.12054	NaN	NaN	NaN	6.46421	6.51774	NaN	NaN	NaN	NaN	NaN	6.06398	NaN	NaN	NaN	NaN	NaN	NaN	NaN
FBXO2	Q9UK22	FBX2	F-box only protein 2	1.14366	-0.730275	No	0.413252	-0.350642	No	0.35578	-0.241293	No	6.61001	NaN	8.21704	6.82561	8.09444	6.85564	8.13292	8.72326	8.31109	8.77821	NaN	NaN	7.23497	8.23896	6.57917	7.77372	7.31307	NaN	7.56959	8.13912	7.91443	7.60624	7.52925	7.80828	5.45866	NaN	6.35939	NaN	7.74696	7.62374	6.14937	NaN	NaN	NaN
FCGBP	Q9Y6R7	FCGBP	IgGFc-binding protein	0.256537	1.5638	No	0	-0.312979	No	0	-0.200553	No	NaN	NaN	5.32552	5.92408	NaN	NaN	NaN	5.61581	2.5062	NaN	NaN	NaN	NaN	7.37548	NaN	NaN	NaN	NaN	6.50362	7.68846	6.64233	NaN	NaN	6.10876	NaN	NaN	NaN	4.6699	NaN	6.30931	NaN	NaN	NaN	NaN
FDPS	P14324	FPPS	Farnesyl pyrophosphate synthase	0.0570395	-0.125848	No	0.00523383	-0.00339758	No	0.217079	-0.283128	No	7.31006	6.17892	8.62304	7.69575	7.97309	4.8481	8.44138	8.5932	8.40744	8.11999	6.76593	NaN	7.42254	7.204	8.17969	7.86668	NaN	NaN	7.51756	7.54254	7.57613	8.05028	7.48441	6.41066	NaN	NaN	7.33661	7.18984	6.85828	7.34009	NaN	NaN	7.88269	NaN
FDXR	P22570	ADRO	NADPH:adrenodoxin oxidoreductase, mitochondrial	0.0165628	0.0147147	No	0.42197	-0.187842	No	0.742409	-0.349156	No	7.48366	7.96595	7.11493	5.88315	6.01941	8.55602	7.36152	7.03584	5.88699	5.55316	6.57286	6.83891	7.35114	7.38407	6.29996	7.43489	6.80092	7.28007	7.26996	6.77051	7.03822	7.84922	7.32959	7.67488	6.54954	6.74037	7.07637	7.84853	7.37256	8.4899	7.62762	6.85267	7.54932	7.42213
FGA	P02671	FIBA	Fibrinogen alpha chain	0.0887869	0.0662756	No	0.0730004	0.0555914	No	0.285053	0.329269	No	4.9667	6.01957	6.83383	7.01081	5.70934	5.67454	5.68151	6.29276	6.42588	6.13417	6.15838	6.03165	6.30581	6.9137	5.75724	5.15096	6.07942	5.17493	6.10348	6.28116	6.47658	5.86861	6.63902	6.46733	NaN	NaN	6.62995	6.07415	5.83384	6.86761	NaN	5.60966	5.26366	6.52826
FGB	P02675	FIBB	Fibrinogen beta chain	0.989795	-0.670477	No	0.320213	0.137573	No	0.0586896	0.0541178	No	4.75699	3.9974	5.89977	6.45362	5.66825	5.9444	5.43434	6.58931	6.07643	6.08394	5.68624	6.31053	6.18094	5.47403	6.09545	5.38631	5.29587	NaN	5.73427	5.35995	6.62426	5.12076	6.3417	6.62481	5.83495	NaN	6.53872	5.49476	6.10282	6.6095	NaN	6.21368	5.80702	6.26418
FGD4	Q96M96	FGD4	FYVE, RhoGEF and PH domain-containing protein 4	0.189219	-0.866859	No	0.053108	-0.115408	No	NaN	0	No	NaN	NaN	2.95558	NaN	5.20985	NaN	NaN	5.22128	5.38754	4.67787	NaN	NaN	NaN	5.59063	NaN	4.93006	NaN	NaN	5.32752	5.07471	5.67754	5.6768	NaN	NaN	NaN	NaN	NaN	NaN	NaN	NaN	NaN	NaN	NaN	NaN
FGF1	P05230	FGF1	Fibroblast growth factor 1	0	-0.558459	No	0.257363	0.164174	No	0.131566	-0.204306	No	NaN	NaN	4.86319	NaN	NaN	NaN	NaN	5.42165	6.58041	4.77346	6.39044	NaN	NaN	6.14503	NaN	7.0841	5.90859	NaN	NaN	6.43316	5.5928	6.78529	NaN	6.60044	NaN	NaN	5.27408	7.0453	6.76869	7.27412	NaN	NaN	NaN	6.78024
FGG	P02679	FIBG	Fibrinogen gamma chain	0.604558	-0.564675	No	0.575773	0.582886	No	0.322759	0.424519	No	5.10145	4.84081	7.01402	7.37803	6.95747	6.85023	6.03075	7.15922	6.71485	7.36011	6.72747	7.25414	6.38439	7.60338	6.93892	5.98676	6.11461	4.87175	6.65784	6.14296	7.41698	6.19361	7.40803	7.33036	5.44924	NaN	7.30106	5.6047	5.91635	7.41792	NaN	6.2107	6.22825	6.38356
FH	P07954	FUMH	Fumarate hydratase, mitochondrial	2.00879	-0.406547	No	0.537113	-0.113415	No	0.233672	-0.0987558	No	10.0112	9.61869	10.0857	9.84929	9.86412	10.2857	10.2555	10.4855	10.4094	10.0256	9.41962	9.26877	9.77291	9.89745	9.77356	9.93662	9.7534	9.54689	9.61801	9.76399	10.1239	9.94322	9.67806	9.65181	8.90703	9.69023	9.21034	9.80189	9.68632	9.88909	9.59467	9.27147	9.56995	9.52038
FHL1	Q13642-1	FHL1	Four and a half LIM domains protein 1	0.365381	-0.356697	No	0.283267	0.0657116	No	0.56601	-0.122375	No	7.23251	6.60718	6.42092	6.30333	7.72159	6.69381	6.24635	8.01399	7.30119	7.81366	6.67114	NaN	7.11845	6.82332	6.42518	7.37854	6.35389	6.48473	7.00506	6.73666	6.68919	7.30326	7.42995	6.96129	NaN	NaN	5.88262	NaN	7.60796	7.02803	NaN	NaN	NaN	NaN
FKBP1A	P62942	FKB1A	Peptidyl-prolyl cis-trans isomerase FKBP1A	0.414052	-0.0919922	No	1.52994	-0.31343	No	1.24211	-0.551128	No	8.79575	9.18456	9.28955	8.74083	9.10682	8.69462	9.46126	9.26924	9.10209	9.05027	8.1905	7.73935	8.734	8.65422	8.818	8.4824	8.41471	8.16874	9.0201	9.18434	8.6833	9.02786	8.13109	7.88921	7.84234	7.99103	7.65469	7.92675	9.22925	8.68915	8.84719	7.64431	8.21892	8.11307
FKBP2	P26885	FKBP2	Peptidyl-prolyl cis-trans isomerase FKBP2	0.0542268	-0.0186077	No	0.700442	0.180335	No	0.927818	0.390309	No	7.67315	7.88285	8.23858	8.27444	7.91778	7.63175	7.80375	7.90512	8.62791	8.11129	7.42332	NaN	7.59302	8.18995	7.87456	8.88341	6.9605	NaN	7.7521	7.9156	7.90136	8.53303	8.22674	7.44398	7.23116	7.08041	7.7487	7.1281	7.39689	6.88348	7.84043	6.46685	7.2961	6.63349
FKBP3	Q00688	FKBP3	Peptidyl-prolyl cis-trans isomerase FKBP3	0.825913	0.802015	No	0.00668796	0.0073967	No	0	0.340266	No	6.96481	5.68029	6.73351	6.16702	5.79578	4.43522	5.52388	6.12024	6.13918	5.11281	6.8422	NaN	6.51685	6.01925	4.52458	7.24972	NaN	NaN	6.30019	6.25465	5.34173	6.38425	6.20216	5.82639	NaN	7.09457	NaN	5.96009	5.86189	NaN	NaN	NaN	NaN	NaN
FKBP4	Q02790	FKBP4	Peptidyl-prolyl cis-trans isomerase FKBP4	0.0990161	-0.0656189	No	0.73157	-0.109109	No	0.0238052	0.0133858	No	7.46957	7.14263	7.40479	7.67506	7.11989	6.66199	7.7811	7.55097	7.91457	7.2314	6.87178	6.30682	7.15673	7.96973	7.3733	7.46411	6.96485	6.44576	7.10316	7.8937	7.51901	7.87067	7.3452	7.63842	6.37577	6.78993	7.49692	7.64206	7.11165	7.23123	6.64806	7.29473	7.89613	7.02617
FKBP8	Q14318	FKBP8	Peptidyl-prolyl cis-trans isomerase FKBP8	0.761564	0.0861665	No	0.397583	0.351717	No	NaN	0	No	NaN	NaN	4.92414	5.51175	5.63456	NaN	5.14061	4.89031	5.45509	5.46656	NaN	NaN	NaN	5.44397	NaN	5.30767	NaN	NaN	NaN	5.34806	5.28271	4.70014	NaN	NaN	NaN	NaN	NaN	NaN	NaN	NaN	NaN	NaN	NaN	NaN
FLII	Q13045	FLII	Protein flightless-1 homolog	0.296857	-0.151728	No	1.30773	-0.391726	No	1.88867	-0.310159	No	7.31807	7.61452	7.64475	7.54431	7.13644	6.6733	8.0205	7.84843	8.07845	7.39605	7.40396	NaN	7.13419	7.84121	7.63739	7.52107	NaN	NaN	7.78025	8.37238	7.73769	7.81044	7.03044	6.75002	NaN	NaN	7.36972	NaN	7.3343	NaN	NaN	NaN	7.68618	7.46696
FLNA	P21333	FLNA	Filamin-A	0.220337	-0.151458	No	0.342698	0.294389	No	0.867977	0.239669	No	8.08046	7.71038	8.55842	8.53142	8.31559	8.91793	7.89873	8.22745	7.97009	8.93936	8.51372	8.5532	7.73553	8.55009	7.93113	8.16378	7.5347	7.09262	8.37686	7.8355	8.60544	8.23599	9.02833	9.15855	8.31137	8.24617	8.73663	8.57768	8.8318	8.94241	8.03998	8.06934	7.93188	8.80529
FLNB	O75369-8	FLNB	Filamin-B	0.303751	-0.263426	No	0.190489	0.208805	No	0.737035	0.46877	No	7.71131	7.26976	7.91623	8.18357	7.81757	8.45243	7.44696	7.71654	7.47333	9.12631	8.1365	8.59195	7.29951	8.00383	7.02466	7.36037	6.93417	7.06118	8.13027	7.6017	8.05908	7.37758	8.25965	9.05871	7.38786	8.10957	8.62083	7.38823	8.3637	8.01279	6.72257	7.51088	7.31906	8.08322
FLNC	Q14315	FLNC	Filamin-C	0.0230149	0.015764	No	0.249134	0.0691325	No	1.43067	-0.381512	No	6.44792	NaN	5.87714	6.26437	5.83577	5.96291	4.94294	6.3793	6.46294	5.55699	6.57862	NaN	NaN	NaN	6.34201	6.45271	6.4724	6.05816	5.92171	6.36023	6.1199	6.57364	6.65103	6.67226	NaN	NaN	6.58847	7.21047	7.04612	7.34712	NaN	NaN	6.78189	7.47315
FLOT1	O75955	FLOT1	Flotillin-1	1.25687	-0.179469	No	0.906441	-0.231079	No	1.17098	-0.413106	No	8.89398	8.91125	8.78234	8.4809	8.54323	9.04364	9.14961	8.77517	8.8774	8.66322	8.10935	7.8806	8.53666	8.23297	8.97564	8.67188	8.45778	8.57642	8.44018	8.56101	8.85577	8.90241	8.52214	8.15263	7.77919	8.19788	7.99434	8.73145	9.04814	8.69067	8.70421	8.33376	8.65416	8.42533
FLOT2	Q14254	FLOT2	Flotillin-2	2.04829	-0.458669	No	0.51445	-0.156418	No	0.78883	-0.252705	No	9.21048	9.20027	9.42348	8.89905	8.85324	9.77414	9.67138	9.54816	9.60747	9.27872	8.39714	8.59478	9.07426	8.86291	9.30276	9.09728	8.96346	9.09017	8.81979	8.68342	9.45228	9.25852	9.12849	8.68535	8.18189	8.82528	8.61339	8.97489	9.25538	9.04657	9.08293	8.87857	8.90942	8.75265
FMC1	Q96HJ9-2	FMC1	Protein FMC1 homolog	1.47024	1.6948	Yes	0	0.825591	No	0	NaN	No	8.66945	7.55562	7.41487	NaN	6.64308	5.61042	6.27646	6.26628	5.22273	5.35065	8.0293	7.04276	NaN	6.83344	NaN	6.9764	NaN	NaN	NaN	NaN	NaN	6.1508	7.66199	7.32894	6.50125	8.1859	7.23001	6.87203	NaN	NaN	NaN	NaN	NaN	NaN
FN3K	Q9H479	FN3K	Fructosamine-3-kinase	1.28763	-0.351643	No	0.286904	-0.0916785	No	2.31803	-0.513231	No	7.6691	7.63896	8.05659	7.99683	7.63942	8.13497	8.4268	8.10081	8.24332	7.85322	7.48747	7.14597	7.94108	7.69849	7.77618	7.96243	7.91461	7.0743	7.62906	8.20361	7.65761	8.0825	6.89218	7.61022	6.88157	6.38089	7.47056	7.59342	7.52002	8.24816	7.58922	7.08737	7.81183	7.65162
FN3KRP	Q9HA64	KT3K	Ketosamine-3-kinase	1.12685	-0.326933	No	0.0937668	0.0697537	No	0.456844	-0.279748	No	6.38884	6.08997	6.08047	5.64649	6.25014	6.58557	6.4827	5.97298	6.36054	6.68878	6.43821	5.31199	6.10305	6.01518	5.83732	6.68299	5.67182	6.16024	6.55751	6.15532	5.47584	5.94948	6.40531	5.46641	NaN	4.87562	6.20561	5.80731	6.64155	6.07632	6.67169	5.9455	6.14749	5.34815
FRRS1L	Q9P0K9	FRS1L	DOMON domain-containing protein FRRS1L	0.0235385	0.023788	No	0.736047	0.208787	No	0	2.15095	No	NaN	4.46845	5.5479	5.91265	5.31223	5.10903	5.20806	4.98534	6.23321	4.71947	NaN	NaN	5.58835	5.39213	5.91244	6.08936	4.52268	NaN	5.47854	5.48037	5.49994	5.68827	5.38921	4.50624	NaN	NaN	5.0653	NaN	3.23826	NaN	NaN	NaN	NaN	NaN
FSCN1	Q16658	FSCN1	Fascin	1.88765	-0.255999	No	3.07496	-0.21732	No	0.126999	-0.0511031	No	9.68138	9.99581	9.95034	9.64694	9.77068	9.95559	10.416	10.187	9.94574	9.82078	9.21496	8.96044	9.65735	9.81648	9.60136	9.73415	9.44427	9.28954	9.84697	9.92348	9.79278	9.99162	9.70649	9.28677	8.65093	9.44446	9.42869	9.40396	9.63065	9.44605	9.2661	9.16678	9.68248	9.03585
FSD1	Q9BTV5	FSD1	Fibronectin type III and SPRY domain-containing protein 1	0.823872	-0.343954	No	0.324023	-0.103501	No	0.0054243	-0.00264728	No	7.202	7.03218	6.76805	6.51779	6.67093	6.94368	7.08699	7.26321	7.28284	7.33399	6.4595	NaN	7.05786	7.10698	6.63098	7.1935	6.49661	NaN	6.69269	7.28049	7.02625	7.47028	6.59591	6.70472	NaN	6.36996	6.61413	6.60089	6.51392	6.4851	6.50898	NaN	7.07949	6.44774
FSD1L	Q9BXM9	FSD1L	FSD1-like protein	0.198445	-0.0758331	No	0.27212	-0.233622	No	0.231088	0.978874	No	5.5508	5.3628	5.25096	5.11286	4.98772	5.13654	5.45553	5.34367	5.2077	5.50087	4.35553	4.36997	3.49466	5.10111	5.13353	5.54172	NaN	4.27233	5.09058	4.82231	5.15915	5.46472	5.92724	4.9588	NaN	NaN	NaN	4.60917	3.65578	NaN	4.9774	NaN	NaN	4.92288
FTH1	P02794	FRIH	Ferritin heavy chain	0.530419	-0.0862115	No	0.147276	-0.0616577	No	0.861014	-0.323415	No	7.49261	8.17711	8.89719	7.97581	8.47663	7.69404	8.367	8.77644	8.18939	8.42355	7.49433	7.20698	8.31564	7.02842	8.11156	8.13268	7.69176	7.87117	7.90719	7.27671	7.88261	8.03011	7.65063	7.76825	7.57464	7.49336	7.24801	7.31024	7.88908	8.43692	8.505	7.3607	7.69691	7.09702
FTL	P02792	FRIL	Ferritin light chain	0.937495	0.162753	No	0.728962	0.100067	No	0.725361	-0.259796	No	10.779	10.8922	11.3839	10.6773	10.5262	10.7019	10.9301	11.2327	10.5064	10.0736	10.3888	10.4099	10.5038	9.92534	10.773	10.5334	10.3168	10.3603	10.187	10.0012	10.5017	10.5668	11.3087	11.503	10.6015	9.81456	10.6517	10.9186	12.159	12.0945	10.9195	9.97886	10.3985	10.8065
FUBP1	Q96AE4	FUBP1	Far upstream element-binding protein 1	2.68801	0.946139	Yes	1.22952	0.449959	No	1.74426	0.357403	No	7.06876	8.17705	7.85656	7.55569	7.66867	5.64578	7.16284	7.0559	6.90853	6.82298	7.20078	7.0784	8.05624	7.58728	7.011	8.42014	7.07414	NaN	7.31812	7.11546	7.0032	7.51473	7.0502	7.7504	7.08875	7.09937	6.91755	7.23475	6.6659	7.27163	6.77709	6.35081	6.92419	7.00698
FUBP3	Q96I24	FUBP3	Far upstream element-binding protein 3	0.768159	0.742715	No	0	-0.525244	No	0	NaN	No	5.70324	5.71795	5.25355	NaN	NaN	4.26801	5.19677	4.98182	NaN	4.65913	4.8227	NaN	NaN	5.08165	NaN	5.56105	NaN	NaN	5.43	NaN	NaN	6.0863	5.76224	NaN	NaN	NaN	NaN	NaN	NaN	NaN	5.91335	NaN	NaN	NaN
FXR1	P51114	FXR1	RNA-binding protein FXR1	0.841087	-0.197684	No	0	0.454693	No	0	NaN	No	5.72118	NaN	5.60337	NaN	5.91118	5.82885	NaN	5.96991	5.86886	6.03003	6.58792	NaN	6.0713	6.01243	NaN	5.46291	NaN	NaN	5.61661	NaN	NaN	NaN	6.11522	NaN	NaN	5.75385	5.10177	NaN	NaN	NaN	NaN	NaN	NaN	NaN
FXR2	P51116	FXR2	RNA-binding protein FXR2	1.6303	1.14394	Yes	1.4308	1.07927	Yes	0	0.468377	No	5.44333	5.23756	5.93178	NaN	5.98118	NaN	4.34027	4.8874	5.47038	4.49103	6.58274	NaN	NaN	6.55313	6.24212	6.05096	4.71219	NaN	NaN	5.56996	5.18719	5.64253	5.92887	5.5078	NaN	NaN	5.81016	NaN	5.4605	NaN	NaN	NaN	NaN	NaN
FXYD7	P58549	FXYD7	FXYD domain-containing ion transport regulator 7	0.0559361	-0.0790583	No	0.687077	-0.246671	No	0.262799	-0.731219	No	7.07907	6.12076	6.92013	6.62409	7.3678	5.23861	6.76179	7.53959	7.37273	7.59442	6.02438	NaN	6.40428	6.08743	6.68954	6.15729	6.49404	6.57388	6.16412	6.43174	6.68494	6.82145	4.83363	NaN	NaN	NaN	6.22095	NaN	6.4102	6.28776	6.1742	5.6016	6.10681	NaN
G6PD	P11413	G6PD	Glucose-6-phosphate 1-dehydrogenase	0.0094799	-0.00538845	No	0.228148	-0.170347	No	1.33214	0.326686	No	6.34061	6.97201	7.01964	6.49104	6.99119	6.79366	6.43489	6.90411	6.31466	7.39411	6.517	6.46015	6.37065	7.10578	6.60925	6.53515	6.24797	NaN	7.57289	6.60999	6.86603	6.69269	7.26459	7.04898	NaN	6.18681	6.81767	6.43618	6.98992	6.79503	6.19763	5.45493	6.47016	6.41076
GAA	P10253	LYAG	Lysosomal alpha-glucosidase	0.555085	-0.356758	No	0.432754	0.1903	No	0.394465	0.330477	No	6.51747	4.1714	6.91176	6.66719	7.08336	6.52131	5.64635	7.19381	6.71885	7.05466	7.09866	6.20174	6.00059	6.61955	7.08649	6.51122	6.37004	NaN	6.3226	6.64195	7.01921	6.0112	6.57568	7.21196	NaN	6.64885	7.14496	6.29191	6.52833	6.7959	NaN	NaN	5.91467	6.6637
GABARAPL2	P60520	GBRL2	Gamma-aminobutyric acid receptor-associated protein-like 2	1.37056	-0.730493	No	0.211181	-0.136991	No	0.24548	-0.267011	No	4.42034	4.26909	5.58647	5.32492	5.79605	5.68764	5.64573	6.13218	5.57828	6.0055	4.68848	4.57567	5.76812	5.24391	5.4072	5.89705	5.58178	5.40099	5.1761	5.41206	5.39707	5.43437	5.2853	4.58571	4.13511	5.60943	4.4998	4.70879	5.95572	5.04842	5.964	5.93254	4.22292	3.30262
GABBR1	Q9UBS5	GABR1	Gamma-aminobutyric acid type B receptor subunit 1	0.692259	-0.344045	No	0.117387	-0.182288	No	0	0.868107	No	NaN	NaN	6.35167	6.23086	5.92996	6.54697	6.56213	6.67672	6.90342	5.96448	6.23251	NaN	4.91932	6.83369	NaN	6.33916	NaN	NaN	6.11476	6.24701	6.25252	6.27727	6.5785	6.35207	NaN	NaN	5.96772	NaN	5.71039	NaN	NaN	NaN	NaN	6.39789
GABBR2	O75899	GABR2	Gamma-aminobutyric acid type B receptor subunit 2	0.400244	-0.301614	No	0.276048	-0.138661	No	0	-1.03759	No	4.88381	5.13422	5.62308	4.96159	5.99681	5.234	5.8823	5.59157	6.1066	5.2931	5.36066	NaN	5.88223	5.39336	5.50441	5.4972	NaN	NaN	5.48013	5.65414	6.0318	5.66577	4.71026	5.14639	NaN	NaN	NaN	NaN	5.74785	NaN	5.57167	NaN	5.07122	NaN
GABRA1	P14867	GBRA1	Gamma-aminobutyric acid receptor subunit alpha-1	0.528011	-0.246663	No	1.34099	-0.307776	No	0.153641	-0.146289	No	7.28414	7.1742	7.7502	7.14235	6.84108	7.0561	8.07001	7.60139	7.40471	7.29306	6.69541	NaN	7.14305	6.8377	6.80561	7.24634	7.35753	6.06903	7.17941	7.16102	7.17852	7.3905	6.68601	6.79135	NaN	NaN	6.66179	7.28071	6.47146	7.15171	6.89465	NaN	7.67565	6.7062
GABRA3	P34903	GBRA3	Gamma-aminobutyric acid receptor subunit alpha-3	0.101593	0.166605	No	1.69943	-0.633834	No	0	-1.10341	No	5.88064	NaN	5.54545	NaN	5.25327	6.20422	5.8294	4.88867	6.05246	NaN	4.88528	NaN	5.07525	NaN	5.451	5.73142	5.49795	4.8736	NaN	5.08115	5.93894	6.53231	NaN	4.10957	NaN	NaN	4.65331	NaN	5.7721	5.21297	5.01298	NaN	NaN	4.59328
GABRB1	P18505	GBRB1	Gamma-aminobutyric acid receptor subunit beta-1	0.5801	-0.313242	No	0.415375	-0.138407	No	0.373508	-0.255232	No	6.63308	7.08175	7.50832	7.237	6.83322	6.00231	7.66941	7.88755	7.90407	7.39624	6.78419	NaN	7.06458	7.54139	7.66548	7.35021	7.42557	7.06973	6.95733	7.43519	7.67747	7.60232	NaN	6.22354	NaN	NaN	7.47917	7.30713	NaN	6.98973	7.05169	NaN	7.49041	7.2954
GABRB3	P28472	GBRB3	Gamma-aminobutyric acid receptor subunit beta-3	0	NaN	No	NaN	0	No	NaN	0	No	NaN	NaN	NaN	NaN	NaN	NaN	NaN	4.93621	4.59667	NaN	NaN	NaN	NaN	NaN	NaN	NaN	NaN	NaN	NaN	NaN	NaN	NaN	NaN	NaN	NaN	NaN	NaN	NaN	NaN	NaN	NaN	NaN	NaN	NaN
GAK	O14976	GAK	Cyclin-G-associated kinase	0.70373	-0.34805	No	1.85963	-0.530979	No	0.077654	-0.160336	No	6.70516	6.7527	6.36595	6.51369	6.83293	7.74599	6.5177	7.03103	6.70673	6.90922	5.70975	NaN	6.36055	6.7363	6.80479	6.79592	6.69614	NaN	6.98822	7.06429	7.19602	7.11754	6.51369	5.89142	NaN	NaN	6.64187	NaN	6.06441	6.66137	6.52252	NaN	NaN	6.23042
GAMT	Q14353	GAMT	Guanidinoacetate N-methyltransferase	0.22835	-0.200038	No	0.183043	-0.237953	No	0	NaN	No	NaN	NaN	NaN	6.4061	6.71425	NaN	6.07605	4.8509	6.87351	6.64691	NaN	NaN	6.79036	6.70056	NaN	6.66465	NaN	NaN	6.63156	NaN	6.6065	7.29936	NaN	NaN	NaN	NaN	6.34521	NaN	NaN	6.35026	NaN	5.96748	NaN	NaN
GAN	Q9H2C0	GAN	Gigaxonin	0.223697	-0.40651	No	0.930708	-0.586708	No	0	-0.368658	No	NaN	NaN	4.59567	6.83658	7.23296	6.49582	NaN	6.24034	6.98737	6.65704	NaN	6.47419	NaN	6.5713	6.02547	6.66902	6.07819	NaN	7.61846	6.9534	7.05353	7.01899	6.59733	7.03469	NaN	NaN	NaN	NaN	6.96599	NaN	NaN	NaN	NaN	NaN
GANAB	Q14697	GANAB	Neutral alpha-glucosidase AB	0.913042	0.212318	No	1.16193	0.300231	No	1.11644	0.329452	No	9.23158	9.11431	9.03351	9.11603	8.64116	9.08916	9.00068	8.48716	9.20536	8.29263	8.99777	7.72665	9.10995	9.0843	8.92876	9.57031	8.33258	7.89715	8.73318	9.07924	8.4105	9.1637	8.98948	8.6204	8.7003	8.92983	8.58084	8.85128	8.32564	8.3454	8.77619	8.36041	8.70459	8.18319
GAP43	P17677	NEUM	Neuromodulin	0.400081	-0.165305	No	0.0696082	0.0148087	No	0.79085	-0.282677	No	7.35558	8.65341	9.6194	8.52922	9.04543	7.88758	9.27566	9.34246	8.50745	9.0164	7.30611	8.0803	8.79667	7.76252	8.40165	8.83146	7.34025	8.13437	8.41049	7.878	8.43064	8.89613	8.38008	6.39545	8.21324	6.75871	7.93741	6.9202	8.77801	6.94021	8.95435	7.25585	7.72072	6.65202
GAPDH	P04406	G3P	Glyceraldehyde-3-phosphate dehydrogenase	2.03853	-0.391943	No	0.20143	0.0526096	No	0.449826	0.160985	No	14.2485	14.7413	15.1623	14.8432	14.8284	14.8093	15.1661	15.2921	15.1282	15.3877	14.3879	14.3691	14.3721	14.6302	14.4098	14.6058	14.2164	13.9477	14.511	14.4603	14.6817	14.6423	14.9206	14.9877	14.188	14.002	14.5639	14.1709	14.9649	14.6072	14.5899	13.8534	13.819	14.0327
GAPDHS	O14556	G3PT	Glyceraldehyde-3-phosphate dehydrogenase, testis-specific	NaN	0	No	0	NaN	No	0	NaN	No	NaN	NaN	NaN	NaN	NaN	NaN	NaN	NaN	NaN	NaN	NaN	NaN	NaN	NaN	NaN	NaN	NaN	NaN	4.95524	NaN	4.54232	NaN	NaN	NaN	NaN	NaN	NaN	NaN	NaN	NaN	NaN	NaN	NaN	5.49516
GAPVD1	Q14C86	GAPD1	GTPase-activating protein and VPS9 domain-containing protein 1	0.903775	-0.234259	No	0.0171487	0.0167317	No	0	-1.52303	No	5.98762	NaN	5.79642	6.21552	6.19512	6.11495	6.04145	6.35454	6.40216	6.26006	NaN	NaN	5.1459	6.5398	NaN	6.02199	NaN	NaN	5.73614	6.27798	6.03974	5.64338	NaN	4.43514	NaN	NaN	NaN	NaN	5.32434	5.95817	NaN	NaN	NaN	NaN
GARS1	P41250-2	GARS	Glycine--tRNA ligase	0.525719	-0.132493	No	0.162518	0.0465403	No	0.101552	-0.0440223	No	7.02336	7.02019	7.13627	6.751	6.71419	6.80489	7.17997	7.57611	6.77486	6.97165	6.81737	6.54184	6.88413	6.68912	7.13187	7.03327	6.45754	6.86027	7.10484	6.61436	6.86169	6.91968	6.80854	6.63622	6.66883	6.93682	6.78604	6.93052	6.96176	6.99314	6.8278	6.42699	7.23692	6.5845
GART	P22102	PUR2	Trifunctional purine biosynthetic protein adenosine-3	0	1.12825	No	0	NaN	No	0	0.308926	No	6.40927	NaN	4.64188	NaN	NaN	5.28102	NaN	NaN	NaN	NaN	5.44209	NaN	NaN	5.57512	NaN	NaN	NaN	NaN	NaN	NaN	4.85301	NaN	5.50272	NaN	NaN	5.83593	NaN	NaN	5.1938	NaN	NaN	NaN	NaN	NaN
GAS7	O60861	GAS7	Growth arrest-specific protein 7	0.218391	-0.113709	No	0.399058	0.169218	No	0.124155	0.171383	No	5.75063	5.58328	5.46185	5.29739	5.65037	6.16727	5.06844	5.2446	5.81024	6.02152	5.39528	NaN	5.56674	5.66147	6.04902	6.14916	5.81469	NaN	5.22932	5.68926	5.71165	5.53066	5.76955	5.37031	4.40511	NaN	NaN	NaN	4.96031	4.91501	5.1555	NaN	NaN	5.18711
GATD3B	A0A0B4J2D5	GAL3B	Putative glutamine amidotransferase-like class 1 domain-containing protein 3B, mitochondrial	1.0195	-0.214997	No	0.53722	-0.161378	No	0.175036	-0.170983	No	8.43823	8.11388	7.76157	7.6955	7.87998	8.85923	8.3258	8.19505	7.60758	7.97647	7.37831	6.48585	7.5705	7.89246	7.14325	7.94458	7.46705	7.119	7.4523	7.80923	7.67153	7.8641	7.99778	7.4852	6.8507	7.1397	7.13935	7.98848	7.80392	7.96084	8.67178	6.32383	7.26854	7.59819
GBA1	P04062	GBA1	Lysosomal acid glucosylceramidase	0.521131	0.531421	No	0	2.88392	No	0	0.263345	No	NaN	NaN	5.68147	6.57697	6.39115	6.86407	NaN	5.8745	5.4591	5.72172	6.17743	6.8668	NaN	6.05743	NaN	4.66707	NaN	NaN	6.23275	3.17351	6.32468	NaN	6.55362	7.5149	NaN	NaN	7.35544	NaN	6.29027	NaN	NaN	NaN	NaN	5.45154
GBP6	Q6ZN66	GBP6	Guanylate-binding protein 6	0	NaN	No	0	-0.17792	No	NaN	0	No	6.72105	NaN	NaN	NaN	NaN	NaN	NaN	NaN	NaN	5.51325	NaN	NaN	NaN	6.77548	5.34291	NaN	NaN	NaN	7.40335	NaN	5.52083	NaN	NaN	NaN	NaN	NaN	NaN	NaN	NaN	NaN	NaN	NaN	NaN	NaN
GCA	P28676	GRAN	Grancalcin	0.542813	-0.745322	No	0	0.278296	No	0	NaN	No	NaN	NaN	5.135	NaN	4.32292	NaN	5.35511	5.5202	4.78628	5.42836	NaN	NaN	NaN	6.60431	NaN	NaN	NaN	NaN	4.0396	6.32601	NaN	NaN	NaN	5.64901	NaN	NaN	5.70771	NaN	NaN	NaN	NaN	NaN	NaN	NaN
GCDH	Q92947	GCDH	Glutaryl-CoA dehydrogenase, mitochondrial	0.0858977	-0.116979	No	0.14515	0.0458789	No	0.157642	-0.164325	No	6.9418	5.30356	6.88339	7.02909	6.66756	5.78835	7.14667	6.80736	7.03309	6.63484	7.15557	6.04216	6.90299	6.53576	7.65854	6.6899	6.77636	6.19352	6.87858	6.84335	7.24673	6.77109	6.48502	7.08854	5.85585	6.6521	6.82571	7.12287	7.18778	7.09909	7.04714	NaN	6.87028	5.99534
GDA	Q9Y2T3	GUAD	Guanine deaminase	1.5966	-0.419749	No	0.443913	-0.0514269	No	0.0767308	0.0155297	No	7.89897	8.53185	9.04014	8.39492	8.758	8.39084	9.39424	9.28969	8.61735	9.03051	7.94218	8.08142	8.47496	8.35898	8.00671	8.03249	8.19365	8.183	8.43713	8.27338	8.11162	8.00653	8.29353	8.22065	7.7655	7.44257	8.12004	7.10958	8.3525	7.90725	7.72154	7.63381	8.03414	7.20944
GDAP1	Q8TB36	GDAP1	Ganglioside-induced differentiation-associated protein 1	2.35774	-0.55005	No	1.39846	-0.299512	No	0.294746	-0.176177	No	6.82132	7.26361	7.61155	7.46405	7.89609	7.45674	8.00847	8.02902	8.17054	8.1421	6.01852	5.769	7.05474	7.18174	7.38295	7.89097	6.82374	5.82515	7.33396	7.38545	7.70599	8.0207	7.13478	6.65357	5.97307	5.87741	6.3775	6.96392	7.48382	7.18614	6.82122	5.41352	6.84409	6.28853
GDAP1L1	Q96MZ0	GD1L1	Ganglioside-induced differentiation-associated protein 1-like 1	0.100489	-0.270091	No	0	-0.416948	No	0	0.707613	No	NaN	NaN	NaN	4.02788	4.19672	NaN	3.92629	5.04298	5.10095	3.66383	NaN	NaN	4.94693	5.25562	NaN	NaN	NaN	NaN	NaN	5.67257	4.62832	4.12203	5.13651	NaN	NaN	NaN	NaN	NaN	4.4289	NaN	NaN	NaN	NaN	NaN
GDE1	Q9NZC3	GDE1	Glycerophosphodiester phosphodiesterase 1	2.91507	-0.221369	No	0.148994	0.138255	No	1.19963	0.889	No	6.73321	NaN	6.99839	6.73345	6.59307	NaN	4.65625	7.23324	6.94153	6.81424	6.64427	NaN	5.81244	6.05542	6.91206	6.93168	5.51079	NaN	5.88624	6.42064	NaN	7.07311	6.38717	6.62364	NaN	NaN	7.13336	6.66325	5.88466	5.77199	NaN	NaN	5.82052	NaN
GDI1	P31150	GDIA	Rab GDP dissociation inhibitor alpha	1.31707	-0.39446	No	1.95438	-0.201694	No	1.3256	-0.249557	No	8.91216	9.23793	9.90989	9.4524	9.79004	9.22	10.0303	9.98361	10.1012	9.9396	8.74946	7.91413	9.03076	9.42244	9.58049	9.76231	9.15243	8.19996	9.14693	9.64281	9.67529	9.85234	9.11715	8.61584	8.4242	7.93816	8.92584	8.93555	9.35799	8.89392	9.0258	8.19717	9.17856	8.80065
GDI2	P50395	GDIB	Rab GDP dissociation inhibitor beta	2.30095	-0.513155	No	0.209538	-0.0660901	No	0.440104	-0.151348	No	9.56028	9.56299	9.98149	9.79278	9.83342	10.1894	10.2002	10.2165	10.1502	10.5405	9.66819	9.48103	9.65536	9.74776	9.91309	9.93735	9.67894	8.96952	9.99916	9.87325	10.1025	10.1759	9.79266	9.94051	9.25621	9.26784	9.86216	9.87573	10.1897	10.1013	9.99855	9.03531	9.88854	9.68979
GDPD3	Q7L5L3	GDPD3	Lysophospholipase D GDPD3	0.438658	0.381392	No	0.00694756	0.0124037	No	0.390243	0.805732	No	NaN	NaN	5.26203	6.72202	7.40684	7.05053	6.46465	5.51002	6.18238	6.55431	5.97747	6.30163	NaN	6.288	NaN	4.45394	NaN	NaN	6.51668	5.77813	6.7182	4.939	6.68399	7.73443	NaN	6.60366	7.0034	NaN	6.47761	6.32936	NaN	NaN	NaN	6.49582
GET3	O43681	GET3	ATPase GET3	0.546661	-0.334924	No	0.431022	-0.178374	No	1.06093	0.419404	No	8.17585	7.53795	7.74879	6.767	6.60776	7.79522	8.65892	8.23627	6.60959	7.21198	7.59141	6.19417	7.46285	7.3517	6.79992	7.42244	7.94788	NaN	6.94396	7.59822	7.23965	7.79047	7.56055	NaN	NaN	6.72228	7.1056	6.71592	7.13017	6.70209	6.3601	6.62019	6.22707	6.4493
GFAP	P14136	GFAP	Glial fibrillary acidic protein	0.844386	-0.194579	No	0.6283	-0.187549	No	0.206802	-0.0792794	No	14.0438	13.116	14.4296	13.3593	13.0407	14.358	13.6371	14.3475	13.3766	13.243	14.7915	13.5374	13.2147	13.3944	13.5516	14.6117	15.5967	13.5626	13.1863	13.6696	13.3958	14.8155	15.239	16.5894	13.975	13.3972	14.6146	15.9327	15.5826	17.1287	14.1099	12.8805	14.7113	15.8106
GFOD1	Q9NXC2	GFOD1	Glucose-fructose oxidoreductase domain-containing protein 1	0.640734	-0.36355	No	0.0629835	0.0289794	No	0	-0.610733	No	7.1616	6.84654	7.27703	6.65942	NaN	7.16999	7.42479	7.20315	7.60087	7.52007	6.38206	NaN	7.13302	7.69911	7.41934	7.2457	6.69495	NaN	6.85654	7.18631	7.47704	7.51949	NaN	6.65365	NaN	NaN	NaN	6.19925	6.7846	7.26438	6.51621	6.13706	6.72014	NaN
GFPT1	Q06210	GFPT1	Glutamine--fructose-6-phosphate aminotransferase	0.562161	1.4389	No	0	NaN	No	0	NaN	No	6.17199	5.98437	NaN	NaN	NaN	5.39385	3.88471	NaN	NaN	NaN	5.42721	NaN	NaN	5.39629	NaN	NaN	NaN	NaN	NaN	NaN	NaN	NaN	5.06859	NaN	NaN	NaN	NaN	NaN	NaN	NaN	NaN	NaN	NaN	NaN
GFRA2	O00451	GFRA2	GDNF family receptor alpha-2	0.187176	-0.32128	No	0.129811	-0.122968	No	0.220132	0.320674	No	5.80421	5.93352	NaN	4.83201	4.7076	NaN	6.71326	NaN	5.899	3.82472	NaN	NaN	5.28461	NaN	5.66737	5.27608	NaN	NaN	5.1214	5.53524	NaN	5.68523	3.8667	5.50875	NaN	NaN	5.0808	NaN	NaN	4.74322	4.14137	NaN	5.20498	NaN
GGCT	O75223	GGCT	Gamma-glutamylcyclotransferase	0.440965	-0.90603	No	0.222364	0.522317	No	0.576124	0.990155	No	6.55272	7.16342	9.72063	10.4857	10.2985	10.3036	9.11619	9.64707	9.173	10.5112	9.90939	10.5575	7.77298	9.33748	7.42376	8.35684	7.59169	6.84145	9.37002	8.71988	9.7491	7.95188	9.30557	10.5262	8.73259	9.65957	9.97455	6.58351	9.37056	8.71741	7.37261	6.96097	7.43764	8.98188
GGPS1	O95749	GGPPS	Geranylgeranyl pyrophosphate synthase	NaN	0	No	0	NaN	No	NaN	0	No	NaN	NaN	NaN	NaN	NaN	NaN	NaN	NaN	NaN	NaN	NaN	NaN	NaN	NaN	NaN	NaN	NaN	NaN	5.44748	NaN	NaN	NaN	NaN	NaN	NaN	NaN	NaN	NaN	NaN	NaN	NaN	NaN	NaN	NaN
GGT7	Q9UJ14	GGT7	Glutathione hydrolase 7	0.672807	-0.269153	No	0.430786	-0.109878	No	1.84109	-0.537712	No	6.67199	6.80761	7.5023	7.46578	7.56699	6.59974	7.69538	7.57695	7.93751	7.55085	7.05674	NaN	7.35941	7.71659	7.26396	7.71536	7.47524	7.3748	7.10004	7.81203	7.4529	7.82124	6.13676	6.88004	5.90318	5.44668	6.67972	6.35199	6.56759	7.08844	6.76878	NaN	7.50041	6.71504
GIPC1	O14908	GIPC1	PDZ domain-containing protein GIPC1	0.190101	-0.126013	No	0.270547	0.183057	No	0	-0.0725255	No	6.18674	6.08167	NaN	6.14118	NaN	6.11035	NaN	5.77621	6.4696	5.52126	NaN	NaN	NaN	5.7393	NaN	5.78987	6.21169	NaN	6.76341	5.7615	6.45162	5.40155	NaN	NaN	NaN	NaN	6.35008	NaN	5.68963	NaN	NaN	NaN	6.4226	NaN
GIT1	Q9Y2X7	GIT1	ARF GTPase-activating protein GIT1	3.10287	-0.45662	No	0.183006	-0.0877901	No	1.54494	-0.269839	No	7.668	7.93514	7.91673	7.87934	7.94502	8.17933	8.32063	8.5452	8.2635	8.31866	7.27366	7.63794	7.3886	8.30511	7.69657	8.36304	7.78405	7.02474	7.79082	8.14697	8.191	8.25408	7.50702	7.60607	6.77973	6.78483	7.87169	6.96096	7.81972	7.76886	7.43895	6.7937	8.10059	7.20752
GJA1	P17302	CXA1	Gap junction alpha-1 protein	0.066403	0.0832563	No	0.637317	-0.452016	No	1.30563	-0.638604	No	6.27355	8.4707	8.79611	7.04138	8.1299	7.72363	7.37819	8.33953	6.49493	8.35909	8.64952	6.86451	8.89302	7.16669	NaN	8.76545	8.62575	7.0234	8.74516	8.77082	6.79626	9.43414	7.05936	8.64912	7.90111	8.54078	7.87926	7.47171	8.12916	9.85405	8.82021	8.96638	8.55155	7.01162
GLG1	Q92896	GSLG1	Golgi apparatus protein 1	2.70193	1.26825	Yes	3.19715	1.34932	Yes	3.00019	1.33553	Yes	6.57801	7.11332	6.76032	5.70367	6.35614	5.22686	5.61074	5.21935	5.12584	4.98743	6.62833	6.08159	6.89121	6.31831	6.59881	7.13949	5.01848	4.28899	5.7598	5.54988	5.58764	5.35704	6.82087	6.28655	6.59762	6.87086	7.19128	6.72282	4.91611	5.62367	5.30406	5.58364	5.34991	5.69947
GLO1	Q04760	LGUL	Lactoylglutathione lyase	0.423718	-0.255986	No	0.455495	-0.161936	No	0.0228712	0.0146541	No	7.43229	7.85514	8.70364	7.90915	8.18607	6.8592	8.78978	8.79865	8.5521	8.36649	7.3409	7.83799	8.28801	7.75948	7.71946	8.52687	7.9512	7.65983	7.91248	7.9561	8.248	8.71672	8.24744	7.49154	7.79595	7.08002	8.03131	7.85187	8.07388	8.09941	8.02106	7.46729	7.17613	7.57242
GLOD4	Q9HC38	GLOD4	Glyoxalase domain-containing protein 4	0.881867	-0.32677	No	0.602884	-0.193847	No	0.0164726	0.0107757	No	6.75753	7.45543	7.86071	6.90132	7.58837	6.52307	7.90985	8.23958	7.72629	7.79842	6.51227	6.23358	7.24657	7.29639	6.91682	7.18014	6.97595	6.7749	7.54019	6.8687	7.25021	7.13891	7.61594	6.59173	6.72259	6.23257	6.86119	6.48995	7.28625	6.95918	7.17085	6.25471	5.92688	6.85146
GLRX	P35754	GLRX1	Glutaredoxin-1	0.187669	0.0860957	No	0.51643	0.125738	No	0.409194	0.187993	No	8.51774	7.96045	8.28797	8.29884	7.97836	7.97037	8.26668	8.0422	8.01358	8.32005	7.71714	8.21567	7.92864	7.80419	8.25721	8.19019	7.52062	7.59157	7.99539	7.85777	8.12898	8.26428	7.85633	8.39615	7.85958	7.23918	8.12659	7.05334	8.13369	7.90223	7.55582	NaN	7.44955	7.31074
GLS	O94925	GLSK	Glutaminase kidney isoform, mitochondrial	1.12418	-0.842711	No	0.143665	-0.11352	No	0.265466	-0.118881	No	7.91779	7.04154	8.18253	7.17969	8.06123	7.58515	8.70651	9.62993	8.02065	8.65409	7.36029	NaN	8.43846	8.59752	7.18025	8.05239	7.62435	7.23894	7.6263	8.44322	8.15009	8.35255	7.94271	7.4693	6.94312	7.55507	7.48799	7.02407	7.88658	7.81075	7.57705	6.89951	7.5964	7.36525
GLUD1	P00367	DHE3	Glutamate dehydrogenase 1, mitochondrial	0.829087	-0.189899	No	0.606093	-0.100393	No	1.13958	-0.250972	No	10.6066	10.8535	10.8253	10.2984	10.3378	11.12	11.0954	10.8323	10.5738	10.2496	10.2956	10.2486	10.7073	10.2795	10.5879	10.8799	10.5544	10.6372	10.6909	10.159	10.6414	10.9182	10.6147	10.7317	9.90975	10.2881	10.3378	10.9454	10.8549	11.0796	10.6253	10.4731	10.4459	10.8545
GLUL	P15104	GLNA	Glutamine synthetase	0.0566604	-0.0196068	No	0.0266251	-0.0142581	No	0.516256	-0.173908	No	9.58878	10.0181	9.82182	9.89612	9.86104	9.7706	10.0513	9.41845	9.88136	10.1622	9.47887	8.91251	9.42093	9.73958	10.2533	9.51899	9.47027	8.31352	9.87958	10.1864	9.82973	9.73019	9.66914	8.91236	8.80715	8.65748	10.0158	9.52939	9.94978	9.10758	9.52651	8.32031	10.3431	9.38743
GMFB	P60983	GMFB	Glia maturation factor beta	0.141495	-0.0512232	No	0.0598068	0.0174284	No	0.276072	-0.117824	No	7.49244	7.49385	7.79818	7.62225	7.89871	7.41239	8.01013	7.78934	7.743	7.60669	7.4082	6.47198	7.22189	7.61557	7.0115	7.21996	7.41743	6.02176	7.35975	7.4601	7.2473	7.33819	7.58885	6.93536	6.1038	6.74597	6.60628	6.87307	7.39565	7.14992	6.769	7.2264	6.11677	6.90253
GMFG	O60234	GMFG	Glia maturation factor gamma	0.279125	-0.513789	No	0.1684	-0.144266	No	0.147493	0.180622	No	6.09191	4.48152	7.99112	6.80902	5.32614	5.9545	7.2695	7.04314	5.97426	7.02725	7.08745	5.8156	6.71393	6.43977	5.35253	5.9321	6.69494	6.41369	5.74347	6.16666	6.39344	6.79477	5.64908	7.19723	5.85008	5.58655	6.56494	6.71966	7.2211	6.00382	6.23202	5.6852	5.01652	6.32515
GMPPB	Q9Y5P6	GMPPB	Mannose-1-phosphate guanyltransferase beta	0.176436	-0.0845157	No	1.52134	-0.16033	No	0.00687405	0.00440327	No	7.20092	7.50856	7.75981	7.61486	7.03508	6.67045	7.92311	7.64463	8.03204	7.27158	7.41657	7.39596	7.51984	7.07142	7.31123	8.02085	7.53799	7.6511	7.67849	7.26735	7.61359	7.94934	6.79276	7.31425	7.29758	7.23547	7.23348	7.80152	7.25506	7.85988	7.57616	7.15907	6.62242	7.17606
GMPR2	Q9P2T1	GMPR2	GMP reductase 2	0.339639	0.784883	No	0.0190408	0.0352333	No	0.679434	-0.646976	No	5.02558	NaN	5.65297	4.614	5.80103	1.51114	5.8761	5.51952	5.16982	5.75356	5.46546	NaN	NaN	5.28574	4.29904	NaN	5.6207	NaN	5.55892	4.16386	5.15998	NaN	4.85869	5.333	NaN	3.95048	NaN	NaN	5.72627	5.75937	4.95424	NaN	NaN	5.2536
GMPS	P49915	GUAA	GMP synthase	0	NaN	No	0	-0.71152	No	0	NaN	No	4.79945	NaN	4.61366	NaN	NaN	NaN	NaN	NaN	5.87923	NaN	4.05149	NaN	NaN	NaN	NaN	NaN	4.76301	NaN	NaN	NaN	NaN	NaN	NaN	NaN	NaN	NaN	5.30087	NaN	NaN	NaN	NaN	NaN	NaN	NaN
GNAI1	P63096	GNAI1	Guanine nucleotide-binding protein G(i) subunit alpha-1	2.3773	-0.446485	No	1.29983	-0.359189	No	0.647228	-0.24903	No	9.11515	9.8098	9.41992	9.6789	10.0258	9.72183	10.303	9.90198	9.83529	10.5199	8.75863	7.39355	9.17258	9.35457	9.28856	9.49957	8.67927	8.03668	9.4743	9.62628	10.1567	9.64936	9.17572	8.6067	NaN	NaN	9.16007	NaN	9.43763	8.60059	8.39569	NaN	9.65136	NaN
GNAI2	P04899	GNAI2	Guanine nucleotide-binding protein G(i) subunit alpha-2	2.809	-0.557202	No	1.77848	-0.266145	No	1.41769	-0.258518	No	9.3095	9.43251	9.51008	9.13832	9.44109	9.65588	10.0753	10.0375	9.91595	9.9329	8.81147	8.26445	9.2781	9.3366	9.3879	9.55554	9.35769	8.65483	9.48467	9.41124	9.6875	9.63501	9.24173	8.94843	8.33724	8.42128	8.76385	8.38788	9.58927	9.06298	8.97129	8.75402	8.86702	8.40694
GNAI3	P08754	GNAI3	Guanine nucleotide-binding protein G(i) subunit alpha-3	0.623964	1.21201	No	0.154522	0.0946178	No	0	NaN	No	NaN	NaN	6.10539	7.49216	7.98691	NaN	5.84683	5.03689	7.46258	5.44895	NaN	NaN	NaN	7.76114	NaN	7.57176	NaN	NaN	8.18163	7.48038	7.55468	7.66328	NaN	NaN	NaN	NaN	7.02357	NaN	NaN	NaN	NaN	NaN	NaN	NaN
GNAO1	P09471	GNAO	Guanine nucleotide-binding protein G(o) subunit alpha	2.50832	-0.430013	No	2.53709	-0.389548	No	1.96848	-0.474317	No	12.7118	13.189	13.1495	12.6717	12.9775	13.0912	13.6922	13.5088	13.3218	13.2355	12.1412	12.0472	12.7815	12.5069	12.9567	13.0065	12.7731	12.5987	12.9728	12.8794	13.1721	13.3812	12.6862	12.2849	12.1166	12.1162	12.4377	12.5744	13.243	12.7331	13.0668	12.5749	12.8313	12.613
GNAQ	P50148	GNAQ	Guanine nucleotide-binding protein G(q) subunit alpha	1.30937	-0.562185	No	0.182945	-0.063788	No	0.522775	-0.247986	No	7.5824	7.93802	8.28603	7.68591	8.93573	7.55013	8.75573	8.87194	8.81807	9.24314	7.15804	7.00552	7.89277	8.41545	7.98162	8.25155	7.5077	6.68307	7.99368	8.17135	8.50479	8.22708	8.06054	7.50559	6.59687	NaN	7.62071	6.86076	7.51325	8.10086	7.1527	6.2871	7.86189	7.25571
GNAS	P63092	GNAS2	Guanine nucleotide-binding protein G(s) subunit alpha isoforms short	1.80646	-0.602565	No	2.94913	-0.323667	No	1.33226	-0.424545	No	7.2686	7.54177	7.76807	7.92493	7.98543	8.17878	8.52834	8.19281	8.41097	8.19074	7.45299	6.13008	7.54304	8.12595	7.486	8.23567	7.69178	6.49087	7.97368	8.24934	7.88329	8.62678	7.79578	7.6338	6.76359	6.84797	7.44443	7.44023	7.71221	8.01062	7.54354	7.84258	7.71276	7.65136
GNAZ	P19086	GNAZ	Guanine nucleotide-binding protein G(z) subunit alpha	0.236912	0.563612	No	0.858648	-0.600814	No	0	0.216611	No	NaN	NaN	8.37932	7.1455	7.58068	NaN	5.7259	6.18254	7.86583	7.36629	NaN	7.55465	6.18343	7.95405	6.98763	7.46047	7.24845	NaN	7.22261	8.06807	8.18089	7.51727	NaN	6.89333	5.75833	6.51104	6.88479	6.69014	NaN	6.67672	NaN	NaN	NaN	NaN
GNB1	P62873	GBB1	Guanine nucleotide-binding protein G(I)/G(S)/G(T) subunit beta-1	1.42124	-0.371581	No	1.33213	-0.280384	No	1.03804	-0.398915	No	10.2224	10.7627	10.9522	10.6967	11.1298	10.5043	11.3372	11.0466	11.4302	11.3033	9.78296	8.77133	10.0089	10.7131	10.8739	10.588	10.4465	9.03606	10.3347	10.7958	10.7921	11.0153	10.3826	9.87758	8.77798	8.38945	9.97233	9.41056	10.8679	9.70196	9.86317	9.14993	10.0496	9.5714
GNB2	P62879	GBB2	Guanine nucleotide-binding protein G(I)/G(S)/G(T) subunit beta-2	1.35107	-0.553785	No	2.08899	-0.307087	No	1.44907	-0.343351	No	8.36366	8.18229	8.64054	8.23083	8.68024	8.78036	9.27222	9.05884	9.08584	8.66924	7.69352	6.77265	8.16947	8.36527	8.2541	8.46138	8.25452	7.03613	8.53335	8.69894	8.26649	8.76946	8.07415	7.85921	6.86707	7.12129	7.68646	7.5819	8.58617	8.13326	7.73103	7.23128	7.83689	7.73155
GNB5	O14775	GNB5	Guanine nucleotide-binding protein subunit beta-5	1.10738	0.410509	No	0.17769	0.123033	No	1.53589	0.554196	No	NaN	NaN	10.7847	10.6415	10.4839	8.51068	10.563	10.1527	10.2533	10.2727	NaN	NaN	10.5474	10.1803	10.6051	10.1302	11.1138	NaN	9.81896	10.6051	10.2649	10.2819	NaN	9.90125	NaN	NaN	10.6345	NaN	10.0446	9.37242	NaN	NaN	10.0549	9.55846
GNG12	Q9UBI6	GBG12	Guanine nucleotide-binding protein G(I)/G(S)/G(O) subunit gamma-12	0.130868	0.0442217	No	0.140987	-0.148721	No	0.590069	-0.507247	No	5.73073	NaN	5.02082	5.42358	5.36878	NaN	3.96104	4.97075	5.18134	5.52842	4.4087	NaN	NaN	4.7358	NaN	5.3259	NaN	NaN	5.92455	5.2042	5.18986	5.15494	5.09886	5.07832	NaN	NaN	4.61602	5.93581	5.61551	6.06281	5.0943	NaN	5.66651	5.41317
GNG2	P59768	GBG2	Guanine nucleotide-binding protein G(I)/G(S)/G(O) subunit gamma-2	1.59067	-0.352473	No	0.501664	-0.179214	No	1.08184	-0.474243	No	8.70681	9.64095	9.3701	8.93107	9.24346	9.44815	9.9817	9.58582	9.22589	9.4132	7.67915	8.00877	9.08135	8.88837	9.32259	9.38046	8.59664	8.02676	8.93252	9.10621	9.19734	9.5765	8.56822	7.84385	7.87179	8.08553	8.76756	9.14866	9.13965	8.88024	8.9061	8.42611	9.0113	8.76768
GNG3	P63215	GBG3	Guanine nucleotide-binding protein G(I)/G(S)/G(O) subunit gamma-3	0.272053	0.244112	No	1.79738	-0.321499	No	0.612033	-0.354622	No	8.23729	8.8639	8.17068	7.93492	7.99152	6.72363	8.38948	8.18639	8.51733	8.16092	7.51654	7.23069	8.16923	7.94397	7.41661	8.3042	8.01364	7.50342	8.21076	8.55595	7.80564	8.42083	7.52231	6.8512	6.97856	7.36516	6.21717	6.25166	NaN	7.61988	7.24842	6.73927	6.89	6.93929
GNG4	P50150	GBG4	Guanine nucleotide-binding protein G(I)/G(S)/G(O) subunit gamma-4	0.985538	-2.32845	No	0	NaN	No	NaN	0	No	NaN	NaN	3.23211	NaN	2.83375	NaN	NaN	5.94206	4.76612	4.78071	NaN	NaN	NaN	NaN	NaN	NaN	NaN	NaN	NaN	3.63434	NaN	NaN	NaN	NaN	NaN	NaN	NaN	NaN	NaN	NaN	NaN	NaN	NaN	NaN
GNG7	O60262	GBG7	Guanine nucleotide-binding protein G(I)/G(S)/G(O) subunit gamma-7	0.431472	-0.39163	No	1.51547	-0.395293	No	0.0228866	-0.019724	No	8.27092	7.34279	8.42406	8.42066	8.68332	7.49098	8.90574	9.04027	9.01317	8.64976	7.59951	7.40918	8.29106	8.80648	8.88595	8.54045	8.42748	7.78087	8.71999	9.01052	8.78949	9.17603	8.14898	8.10319	6.49083	NaN	8.21083	8.26975	8.10844	7.67312	7.55528	7.48018	8.29282	7.69252
GNL1	P36915	GNL1	Guanine nucleotide-binding protein-like 1	0.12678	0.0675673	No	0.440597	-0.258854	No	2.21571	-0.726493	No	6.3031	5.60409	6.14729	5.97437	6.33967	5.59095	6.11287	6.01563	5.93765	6.37361	4.98224	NaN	5.37279	6.05538	5.73284	6.04156	5.79041	NaN	5.84355	5.75864	6.43421	5.65227	5.21807	5.5522	NaN	NaN	5.8216	5.04783	6.10928	6.47489	4.69237	NaN	6.36731	5.5942
GNPDA1	P46926	GNPI1	Glucosamine-6-phosphate isomerase 1	0.202899	-0.260832	No	0.226074	-0.134356	No	0.116975	0.0480132	No	7.20921	5.65826	7.25589	7.15606	6.74064	6.15565	7.67582	7.47607	7.10743	6.90926	6.3331	NaN	6.91777	7.34315	6.85548	7.23072	7.21334	6.97915	7.11353	7.22874	7.09939	6.697	6.16718	6.48338	NaN	6.30877	6.91658	7.27358	5.98328	6.71477	6.95989	NaN	NaN	7.08205
GOT1	P17174	AATC	Aspartate aminotransferase, cytoplasmic	0.756367	-0.164362	No	0.498398	-0.104502	No	1.02268	-0.360565	No	11.3113	11.9765	11.65	10.9729	11.2709	11.5693	12.1393	11.4928	11.4266	11.3753	11.3487	11.1272	11.4921	10.8475	11.349	11.3338	11.4163	11.4468	11.3334	11.1994	11.1794	11.55	11.1546	10.3944	11.2871	11.428	11.0521	10.7368	11.5083	11.1109	12.0517	11.6375	11.5748	10.3334
GOT2	P00505	AATM	Aspartate aminotransferase, mitochondrial	1.949	-0.367949	No	0.223287	-0.0528054	No	0.560111	-0.121458	No	10.8028	10.975	10.8985	10.1722	10.675	11.0549	11.3964	11.2156	10.8328	10.8636	10.3915	9.77824	10.5758	10.58	10.7907	10.4186	10.327	10.2272	10.3354	10.5838	10.9159	10.4623	10.4687	10.4682	9.68929	9.78877	10.1616	10.334	10.5427	10.2551	10.17	9.91154	10.4545	10.3053
GPC1	P35052	GPC1	Glypican-1	1.51983	-0.189501	No	0.135965	-0.0369291	No	1.36444	-0.328836	No	7.1545	7.46601	7.36284	7.38672	6.91656	7.52406	7.69448	7.37486	7.55073	7.09002	7.2104	7.05533	7.21838	7.15417	7.11469	7.02667	7.32326	6.84491	7.24334	7.17634	6.91683	7.49655	6.39689	6.36651	6.49174	6.71119	6.90143	6.11477	6.5474	6.83122	7.34025	6.82298	6.94779	6.46589
GPD1	P21695	GPDA	Glycerol-3-phosphate dehydrogenase	1.35443	-0.182041	No	1.06981	-0.308618	No	1.01005	-0.346296	No	8.62696	8.58786	8.23667	7.63351	7.63196	8.63675	8.80163	8.53154	7.69685	7.9604	NaN	NaN	7.89423	7.6998	7.90598	8.29958	8.37828	8.27679	8.28564	8.27194	8.18597	8.29051	7.84217	7.29986	7.16334	7.70982	7.44158	7.5993	8.18678	7.71856	7.9595	NaN	7.82302	7.38988
GPD1L	Q8N335	GPD1L	Glycerol-3-phosphate dehydrogenase 1-like protein	0.13035	0.12093	No	0.699341	0.646534	No	1.9052	0.616499	Yes	6.30689	NaN	6.8779	6.38426	7.21285	6.68502	6.39945	6.3837	6.88451	6.34495	NaN	6.40994	7.15836	7.44434	6.18602	6.07132	6.66165	NaN	6.77947	5.88146	6.47478	5.1382	6.8701	6.8552	NaN	6.6333	6.77645	NaN	6.39019	6.19186	NaN	5.92706	NaN	NaN
GPD2	P43304	GPDM	Glycerol-3-phosphate dehydrogenase, mitochondrial	1.94447	-0.618651	No	0.614598	-0.146878	No	0.51895	-0.178269	No	8.37702	8.19921	9.28466	8.5005	8.54078	9.04672	9.33583	9.66247	9.01045	8.93995	7.86714	7.77249	8.38091	8.55841	8.5615	8.19053	8.42333	7.88749	8.17468	8.47481	8.84097	8.41097	8.53706	8.65857	7.8916	7.67911	8.66771	8.70411	8.6511	8.31939	8.39842	8.37466	8.85625	8.60796
GPHN	Q9NQX3	GEPH	Gephyrin	0.303936	-0.0878048	No	0.411355	-0.11658	No	0.141926	0.0800808	No	8.84688	9.29489	9.03461	8.65998	8.63445	8.69804	9.3716	8.89345	9.15087	8.79588	8.87074	8.16641	9.09522	8.92823	8.78208	8.74924	8.96626	8.58065	8.69163	9.25817	8.75485	9.03984	7.74461	8.15742	8.05759	8.923	8.59564	8.65084	8.02009	7.99392	8.54313	8.37236	8.88297	7.83615
GPI	P06744	G6PI	Glucose-6-phosphate isomerase	2.21404	-0.322723	No	0.850648	-0.190207	No	0.96113	-0.306713	No	9.74274	10.0008	10.1756	9.44147	9.83431	10.0705	10.4822	10.3545	9.87297	10.0284	9.26209	8.55799	9.83488	9.57478	8.97324	9.65488	9.31962	9.04303	9.77571	9.50129	9.50883	9.85063	9.64769	8.95084	8.87552	9.14368	8.67312	8.59791	9.86332	9.4923	9.829	8.99418	8.82515	8.72509
GPLD1	P80108	PHLD	Phosphatidylinositol-glycan-specific phospholipase D	0.572263	0.0430326	No	0	NaN	No	NaN	0	No	NaN	NaN	5.22683	6.07058	NaN	5.56311	NaN	5.20304	6.0083	5.91251	NaN	NaN	NaN	5.67044	NaN	NaN	NaN	NaN	NaN	NaN	NaN	NaN	NaN	NaN	NaN	NaN	NaN	NaN	NaN	NaN	NaN	NaN	NaN	NaN
GPM6A	P51674	GPM6A	Neuronal membrane glycoprotein M6-a	2.44889	-0.92303	No	1.84906	-0.425392	No	0.949209	-0.286715	No	9.16593	9.61043	10.3516	9.42084	10.181	9.94191	10.7998	11.1277	10.768	10.7075	9.53932	8.79695	9.5701	9.2262	9.57166	9.75474	10.2114	9.45743	9.8056	9.17809	10.1425	10.2163	9.32689	9.116	8.70018	8.21999	8.93794	9.23055	9.61786	9.40938	9.59155	8.60472	9.00311	9.02522
GPM6B	Q13491-4	GPM6B	Neuronal membrane glycoprotein M6-b	3.36288	-0.752968	No	0.561598	-0.274429	No	1.01085	-1.08052	No	6.01767	4.88858	6.89895	6.55034	7.80636	6.57187	5.71249	7.68684	7.50648	8.44905	5.48064	NaN	NaN	6.26095	6.84407	7.0014	6.29596	NaN	6.03511	6.08683	7.00247	7.2995	6.76162	NaN	NaN	NaN	4.74021	5.58943	7.67529	5.41904	NaN	NaN	5.98757	NaN
GPR158	Q5T848	GP158	Probable G-protein coupled receptor 158	0.0311737	0.0270099	No	0.0606128	-0.0523062	No	0.99575	-0.706934	No	7.1755	6.51394	7.35286	6.67653	7.44101	6.33445	6.3784	7.34431	7.65886	7.30878	6.75608	NaN	7.40559	7.12557	8.01187	7.50011	7.51488	6.72294	6.91437	7.63458	7.20848	7.78844	NaN	6.40101	6.78797	NaN	6.34346	NaN	7.10912	6.74773	7.3912	6.96069	7.51432	6.55826
GPRIN1	Q7Z2K8	GRIN1	G protein-regulated inducer of neurite outgrowth 1	0.713833	0.182342	No	0.104486	0.0271314	No	0.523411	-0.203122	No	7.60912	8.62398	8.18273	7.41658	7.57167	7.53534	8.52033	7.57487	7.50345	7.35837	7.78522	7.10392	7.64551	7.95029	7.53912	7.95947	7.85318	7.41263	7.29279	8.0441	7.37207	7.84598	6.98697	6.90793	7.11561	7.11401	7.75599	7.5355	7.03652	7.49858	7.70224	7.33978	8.08559	6.97202
GPS1	Q13098	CSN1	COP9 signalosome complex subunit 1	0.847856	0.467868	No	0.00300187	0.00471926	No	0	NaN	No	6.49097	NaN	5.86804	5.24788	4.45245	6.72644	5.69916	5.23166	4.55397	3.67581	NaN	NaN	6.22785	5.54536	NaN	5.63766	5.94257	NaN	5.47817	6.44962	NaN	5.46893	NaN	NaN	NaN	NaN	5.24404	NaN	NaN	NaN	NaN	NaN	NaN	NaN
GPX1	P07203	GPX1	Glutathione peroxidase 1	0.586327	-0.49692	No	0.196769	-0.130435	No	0	-0.158779	No	4.97631	4.67956	5.19279	4.70685	5.28047	NaN	4.55261	5.9571	6.09388	5.24375	5.84284	NaN	4.97854	5.59113	4.93009	4.72481	6.141	5.9346	5.43109	4.76486	5.02729	5.35535	4.76769	5.45057	NaN	5.23388	5.9109	4.66505	NaN	5.60935	5.23297	NaN	NaN	NaN
GPX4	P36969-2	GPX4	Phospholipid hydroperoxide glutathione peroxidase	0.771276	-0.373964	No	0.0961675	-0.0358816	No	0.12725	0.0746048	No	7.17908	7.07245	7.99599	7.71041	7.63757	6.86256	8.16616	8.33215	8.11258	7.99188	7.10842	7.04139	7.478	7.80366	7.16918	7.87293	7.27807	6.91598	7.58767	7.34365	7.70595	7.85754	7.3514	7.48765	6.15075	6.56263	7.21564	6.98548	7.09154	6.74071	6.43862	NaN	7.08548	7.46154
GRB2	P62993	GRB2	Growth factor receptor-bound protein 2	0.000939394	-0.000533867	No	0.0397949	0.0189525	No	0.344643	0.120217	No	8.72703	9.38779	9.47505	8.50071	8.82201	9.33452	9.25144	8.99295	8.69007	8.64627	8.36504	8.0649	9.35043	8.40965	8.6351	9.5181	8.62928	8.03092	8.83551	9.00483	8.54068	9.1883	8.95163	8.70868	8.29291	8.01111	8.87566	8.80463	8.77233	9.00568	8.5709	7.61734	8.7646	8.19249
GRHPR	Q9UBQ7	GRHPR	Glyoxylate reductase/hydroxypyruvate reductase	0.100171	-0.0892422	No	1.06243	-0.203349	No	0.0301446	0.0238458	No	6.56801	6.2398	6.85231	5.24381	6.50317	5.55623	6.29718	7.03569	6.22884	6.73537	5.8633	NaN	6.55327	5.93532	6.11401	6.19871	6.11751	NaN	6.54269	6.27846	6.11261	6.63009	6.43133	6.52567	NaN	NaN	5.44539	6.0263	5.99576	6.4593	6.10083	NaN	NaN	6.45671
GRIA1	P42261	GRIA1	Glutamate receptor 1	1.5738	-0.436679	No	0.911564	-0.123526	No	1.63052	-0.44672	No	7.77586	7.93667	8.01327	7.21154	7.59534	8.27072	8.37625	7.99839	7.98795	8.08276	7.67805	7.04951	7.60099	7.04017	7.58618	7.25809	7.63764	7.24414	7.73703	7.33131	7.48047	7.52355	7.02637	7.54367	6.89862	6.33741	6.97999	7.01019	7.59083	7.39653	7.59955	7.06823	7.57294	7.24849
GRIA2	P42262	GRIA2	Glutamate receptor 2	2.41878	-0.63421	No	1.22439	-0.286627	No	0.255352	-0.104835	No	9.31937	9.23556	9.80212	9.35552	9.61932	10.2635	9.9754	10.1815	10.0438	10.0387	8.83177	8.72637	9.42251	9.15153	9.3698	9.43299	9.47021	9.30354	9.27563	9.29552	9.62494	9.6849	8.9481	8.85786	8.80244	9.17125	9.21371	9.29679	9.29398	9.15085	9.40383	8.80886	9.37501	8.88662
GRIA3	P42263	GRIA3	Glutamate receptor 3	0.890975	-1.03948	No	0.55601	-0.046608	No	0	-0.454949	No	NaN	4.38905	5.9026	5.86417	6.28966	5.93625	6.81707	6.71112	6.73399	6.34124	NaN	NaN	NaN	6.36245	6.0825	6.4017	NaN	NaN	6.27758	6.35247	6.18168	6.45232	NaN	NaN	NaN	NaN	6.0686	NaN	NaN	NaN	5.27829	NaN	6.52355	NaN
GRIN1	Q05586	NMDZ1	Glutamate receptor ionotropic, NMDA 1	0.520546	-0.19583	No	0.637728	-0.260207	No	1.53169	-0.742094	No	6.71089	7.39223	6.95405	6.33596	6.61356	6.90341	7.54231	6.74316	7.13036	6.6666	6.80478	5.97159	6.71882	6.5977	6.87891	6.8205	7.55732	6.63295	6.26134	6.99847	6.75621	7.14725	5.41767	5.97236	5.03769	5.98705	5.7841	6.26242	6.38051	6.24016	6.85147	6.32566	6.58328	6.53279
GRIN2B	Q13224	NMDE2	Glutamate receptor ionotropic, NMDA 2B	0.541745	-0.375011	No	0.458786	-0.131792	No	0.716491	-0.250508	No	6.48801	5.76445	7.87691	7.69952	7.97888	5.89141	7.07808	8.1907	8.25636	8.26628	6.60607	6.22964	7.14657	7.5483	7.89226	7.82871	7.19579	6.0137	6.98297	7.66946	7.96644	8.21394	6.40053	6.67767	5.50922	NaN	7.48259	6.5147	6.86733	6.57009	6.2746	NaN	7.57086	6.55437
GRIPAP1	Q4V328	GRAP1	GRIP1-associated protein 1	0.203465	-0.107753	No	0.378851	-0.102089	No	0.229906	-0.0881166	No	7.6116	7.811	7.83075	7.72043	7.89866	6.94992	8.26149	7.95636	8.17767	8.06577	7.18205	6.6808	7.77318	7.87118	7.96714	7.86198	7.79018	6.49659	7.62933	8.01359	8.08795	7.93124	7.77111	7.77557	7.00703	6.58584	7.58465	7.80217	7.79055	7.58822	7.41668	7.16352	7.72834	7.36777
GRK2	P25098	ARBK1	Beta-adrenergic receptor kinase 1	0.475585	-0.781092	No	0.792864	0.326476	No	0.350255	0.752353	No	NaN	4.82842	6.28656	NaN	6.40203	NaN	6.84545	6.5246	6.29092	6.49024	NaN	NaN	6.03709	6.30656	5.42139	6.22383	5.60976	NaN	5.82924	6.4171	4.73489	5.70174	5.5229	6.37277	NaN	NaN	5.91417	NaN	5.40584	NaN	NaN	NaN	4.52652	NaN
GRM5	P41594	GRM5	Metabotropic glutamate receptor 5	0.928719	-0.25708	No	1.27246	-0.35494	No	1.45963	-0.628371	No	7.28139	7.46865	7.551	7.29256	6.94202	7.15188	7.72838	7.64045	7.8758	7.42451	6.64889	6.35491	6.91449	7.63945	7.20301	7.43063	7.49075	6.87298	7.4387	7.48997	7.386	7.64261	6.36045	6.42751	6.11379	5.48483	6.36109	6.70215	6.86249	6.93113	6.66716	6.68021	7.59125	6.48781
GRM7	Q14831	GRM7	Metabotropic glutamate receptor 7	1.04365	-0.358393	No	0.710681	-0.593831	No	0	0.592362	No	5.43556	4.53665	5.70089	5.19696	5.653	5.82433	5.07728	5.70818	6.04498	5.66026	3.31489	NaN	4.44142	6.21434	5.05602	4.44654	4.98932	NaN	5.27416	5.58279	5.30111	5.29499	NaN	NaN	NaN	NaN	4.39928	NaN	5.17087	4.05256	NaN	NaN	3.80691	NaN
GRN	P28799	GRN	Progranulin	1.87319	0.787658	Yes	0.429916	-0.809194	No	0.105013	-0.169377	No	5.94915	5.34638	6.49348	5.76111	7.7671	5.13139	4.77026	5.49906	5.53629	6.44194	5.66021	5.73201	4.77416	5.60981	5.57242	6.25835	5.07384	NaN	8.45675	6.14864	6.76544	5.47623	5.9524	5.95193	5.6212	5.1531	6.10503	4.01488	5.99452	6.43398	NaN	4.37878	5.00071	6.21624
GSDMA	Q96QA5	GSDMA	Gasdermin-A	0.334984	-0.719846	No	0.351102	0.507919	No	0.528775	0.829929	No	5.28381	6.982	8.55931	9.16698	9.11076	9.26951	7.79317	8.1451	7.97205	9.52225	8.60635	9.63958	7.28966	8.23209	7.44603	7.72734	7.31342	6.8491	8.38722	7.58337	8.63108	7.12934	8.30936	9.48603	8.22318	8.99936	8.73066	5.89834	8.24674	8.30037	6.56199	6.46026	6.893	8.20498
GSK3A	P49840	GSK3A	Glycogen synthase kinase-3 alpha	0.336551	0.113312	No	0.671851	-0.149438	No	0.916227	-0.161096	No	7.37298	7.85698	7.699	7.43971	7.78382	7.00602	7.81943	7.60206	7.79642	7.36198	7.09406	7.07909	7.71571	7.44526	7.42459	7.86064	7.45832	7.22675	7.52191	7.94707	7.55276	7.80918	6.83516	7.11305	7.35485	7.00667	7.29561	7.16128	7.32169	7.44227	7.44963	7.02841	7.42354	7.06767
GSK3B	P49841	GSK3B	Glycogen synthase kinase-3 beta	0.27351	-0.211885	No	0.0616723	0.029879	No	0.205102	-0.221386	No	7.32953	6.18171	6.69326	7.24143	7.25842	8.50541	5.75064	7.31948	7.35581	6.83244	7.50862	NaN	7.3261	6.72164	6.91948	7.50244	7.32338	NaN	6.91125	7.25737	6.68582	7.65107	6.97606	5.95034	NaN	6.36025	6.76238	7.2753	6.91904	7.07483	7.15715	NaN	7.3389	6.51686
GSN	P06396	GELS	Gelsolin	0.0332888	0.0316871	No	0.295126	-0.114717	No	0.0886479	0.0759966	No	8.06133	7.97641	8.71055	8.67827	8.49838	7.04849	8.57753	8.6549	8.26997	9.2156	8.24057	7.89163	7.84973	7.95935	7.80593	8.27485	7.95736	7.58766	8.42101	7.94179	8.38178	8.42076	8.68073	7.83205	8.09289	8.25566	7.94372	8.01735	8.57813	8.63112	8.93295	7.28817	7.23297	7.70309
GSPT1	P15170	ERF3A	Eukaryotic peptide chain release factor GTP-binding subunit ERF3A	0.305635	0.213944	No	0.709946	-0.435606	No	0.0481982	-0.0715978	No	7.38707	5.57103	6.31686	6.01432	5.20001	6.2328	5.50937	6.39946	5.54143	5.73651	5.78808	5.35844	5.64534	5.98268	4.92854	5.32743	6.18013	NaN	6.5428	5.42647	5.97254	5.72818	5.9844	NaN	NaN	5.81245	4.96957	NaN	5.62602	4.50335	6.16136	NaN	5.47114	NaN
GSR	P00390	GSHR	Glutathione reductase, mitochondrial	0.897903	-0.44765	No	0.0544444	0.00892909	No	0.0935563	-0.0403373	No	6.40471	5.3871	6.42384	6.2951	6.25484	6.24496	6.65692	6.91541	6.59144	6.59513	6.3416	6.34433	6.2358	6.46126	6.35787	6.49285	6.35438	6.09825	6.30031	6.42989	6.32573	6.67157	6.61877	6.09839	NaN	6.47587	6.17337	6.46859	6.72144	6.47787	6.60661	6.35272	6.48191	6.00275
GSS	P48637	GSHB	Glutathione synthetase	0.21972	-0.190008	No	0.834835	-0.290886	No	0.637967	0.285135	No	5.6405	5.67023	5.55573	5.2586	4.83549	5.88374	6.16621	5.41865	4.41596	6.02605	5.94512	5.25444	4.42873	5.0132	5.3727	4.75457	5.95175	6.16296	4.90895	5.44488	5.08577	4.95976	5.66003	5.02461	6.43388	6.37809	5.80235	6.35809	5.17909	5.64392	6.18847	5.51057	5.65353	5.77066
GSTM2	P28161	GSTM2	Glutathione S-transferase Mu 2	1.30171	-0.510954	No	0.157868	-0.130044	No	0.149742	0.102767	No	6.09658	5.50637	6.99973	6.44677	6.37729	6.06748	6.44933	7.89575	6.74288	6.82607	5.76549	NaN	6.36695	6.31489	6.09454	6.38098	6.36536	NaN	6.15723	5.42179	6.42171	7.20697	6.51608	6.3582	5.97255	5.62708	7.14173	6.55792	6.51432	5.62165	6.66961	6.22854	6.56019	5.96267
GSTM3	P21266	GSTM3	Glutathione S-transferase Mu 3	0.32011	-0.691075	No	0	NaN	No	1.75969	0.657612	Yes	5.626	2.32267	5.18406	NaN	5.19865	4.5058	5.3204	5.81038	4.71618	5.4591	NaN	NaN	NaN	5.58946	NaN	4.95658	5.07709	NaN	3.25249	NaN	6.08425	NaN	5.86776	5.23363	NaN	NaN	NaN	NaN	5.19218	4.59399	NaN	NaN	NaN	NaN
GSTP1	P09211	GSTP1	Glutathione S-transferase P	1.05046	-0.533318	No	0.000853619	0.00118351	No	0.983886	0.324507	No	7.83008	7.8694	9.19509	9.23044	9.29967	8.71777	8.88541	9.24989	9.09147	10.1467	8.67164	8.3205	7.92718	8.72514	8.09236	8.63238	7.81878	6.96998	9.73147	8.44564	8.72095	8.67526	9.25174	9.63771	7.80642	7.21786	8.61106	8.22972	9.04224	8.71797	7.65284	6.93192	7.99408	8.46842
GTF2I	P78347	GTF2I	General transcription factor II-I	0	5.66303	No	0	0.677582	No	0	NaN	No	NaN	4.82279	6.1777	NaN	5.50648	NaN	NaN	0.514665	NaN	NaN	NaN	NaN	NaN	NaN	NaN	4.68836	NaN	NaN	NaN	NaN	NaN	4.01078	7.0944	6.32935	NaN	NaN	6.35166	NaN	NaN	NaN	NaN	NaN	NaN	NaN
GUCY1A2	P33402	GCYA2	Guanylate cyclase soluble subunit alpha-2	0.0088993	-0.00710163	No	0.217445	-0.157623	No	1.72599	-0.434405	No	5.2053	5.68203	5.50421	6.02493	5.72653	4.49695	5.91912	5.99912	5.4942	6.26911	5.67099	NaN	5.07433	5.74031	NaN	5.8378	5.93536	NaN	5.92248	5.72122	5.85779	5.37486	4.87676	5.66469	NaN	NaN	4.26065	4.52335	NaN	5.99502	NaN	NaN	4.69395	5.06293
GUK1	Q16774	KGUA	Guanylate kinase	0.983839	-0.544092	No	0.641356	-0.228289	No	0.0765658	0.0828973	No	4.9778	5.60743	6.07221	5.65571	5.93572	6.43593	6.3933	6.24702	5.8539	6.03919	5.05433	4.71426	5.80212	6.08578	5.90012	5.60824	6.0743	4.85282	5.93158	5.95546	5.88927	5.83116	5.35552	5.02568	NaN	4.96691	4.85799	3.86952	4.3366	5.60205	6.42169	NaN	4.51352	4.32495
GYG1	P46976	GLYG	Glycogenin-1	0.195408	0.0594545	No	0.585451	0.23754	No	0.121433	-0.0422477	No	6.90561	6.80097	6.42665	6.56297	6.24974	6.76893	6.53513	6.6333	6.23519	6.47614	6.5407	6.23463	6.54247	6.90621	6.33082	6.6583	6.57721	5.50764	6.46227	6.13601	6.7427	6.36204	7.38653	6.86367	5.91994	5.86456	6.54532	6.41672	6.84744	6.84982	6.03304	6.07037	6.64225	6.80729
H1-0	P07305	H10	Histone H1.0	2.21712	0.950449	Yes	1.55081	0.69471	Yes	1.37857	0.49222	No	8.97015	8.82139	9.31885	8.9821	8.9341	8.49236	7.671	8.31677	7.50193	8.29228	8.82116	9.02581	8.89387	8.72582	8.87617	9.00801	7.24488	8.10248	8.80686	7.79172	8.4631	8.77355	9.0644	8.89537	8.89573	9.01455	8.8676	8.96506	8.28207	9.039	8.76098	7.95733	8.16822	8.54179
H1-10	Q92522	H1X	Histone H1.10	2.82028	1.33726	Yes	1.5742	0.964347	Yes	1.3034	0.706723	Yes	7.69061	7.45077	8.00839	7.49341	7.774	6.0052	6.16086	6.40744	6.08685	7.07052	8.23305	7.93568	8.02928	7.83401	7.54538	8.10683	6.54626	NaN	6.65662	6.70672	7.35718	7.66004	7.80352	7.76797	8.00473	7.59822	7.64515	8.28072	6.77413	8.37169	6.7136	6.88232	6.64402	7.4742
H1-2	P16403	H12	Histone H1.2	1.56077	1.13667	Yes	1.94704	0.641998	Yes	0.24644	0.127408	No	10.2784	9.96226	10.8951	10.7257	10.6806	9.85653	8.89559	9.35806	8.53176	10.2168	9.6522	11.0519	10.3284	10.6087	10.5145	9.99852	8.49968	10.2217	9.90884	9.61781	10.2608	9.79338	10.4897	10.3403	11.0681	10.7763	10.5481	10.8803	10.4183	11.1071	10.9639	10.6678	9.89349	10.2877
H1-4	P10412	H14	Histone H1.4	2.51333	1.17792	Yes	2.69387	0.731367	Yes	1.31946	0.427415	No	10.4967	10.859	10.6556	10.4574	10.6689	9.75492	9.32142	9.34016	8.89899	9.93257	10.3383	10.9035	10.4165	10.038	10.7259	10.3687	9.24259	9.93517	9.7351	9.64324	9.8405	10.0061	10.5646	10.5016	10.9028	10.8906	10.3661	10.445	10.0656	10.7858	10.6846	10.2537	9.65956	9.65678
H1-5	P16401	H15	Histone H1.5	0.190956	0.239018	No	0.0619399	0.0968579	No	0.0280376	0.0353305	No	5.6455	6.58018	7.07412	6.94335	6.85777	6.83023	6.03103	6.21422	5.4665	7.36384	6.08633	7.08894	5.27635	6.9525	6.04628	5.71687	5.08191	5.13735	6.66008	6.34146	7.45427	5.91106	6.91394	6.94343	6.58058	5.49418	7.13259	5.78212	6.96856	7.05934	5.1905	6.82149	6.03644	6.55852
H2AC20	Q16777	H2A2C	Histone H2A type 2-C	1.24184	0.906038	No	1.75549	0.891996	Yes	1.99055	0.648447	Yes	13.6244	13.6104	13.7839	14.0067	13.9158	13.4813	12.1721	12.6189	12.2737	13.8649	13.9595	13.6974	12.8057	14.3816	13.5136	13.0372	12.4825	12.0366	12.4398	13.2182	13.3679	12.498	14.0684	14.2234	13.4609	13.6581	14.0333	13.4444	13.6468	13.749	12.8636	13.0844	12.5943	13.0599
H2BC12	O60814	H2B1K	Histone H2B type 1-K	0.24205	0.18366	No	0.212577	0.295624	No	0.848166	0.645048	No	7.03909	7.1069	7.88837	7.64929	7.31025	7.59375	6.59055	7.3477	6.73136	7.81225	7.07918	6.9874	6.17306	8.24233	6.68911	6.89071	5.97315	5.67056	7.14662	6.50548	8.29705	6.69518	8.09746	7.4819	7.04886	7.53786	7.64905	5.97969	7.98386	6.86487	5.91047	7.3514	5.46972	6.34422
H3C1	P68431	H31	Histone H3.1	1.12568	0.699636	No	1.0772	0.446212	No	1.32027	0.60919	Yes	10.0212	10.333	10.3839	9.99108	10.286	10.3234	9.09469	9.5601	8.70856	9.83017	10.1037	10.2789	9.9327	9.78244	9.76787	9.07442	9.16948	9.46563	9.17273	9.28118	10.111	9.06268	10.2529	10.3878	10.1531	10.6792	10.2	9.25943	9.84292	10.269	9.45845	9.50327	8.85497	9.3487
H4C1	P62805	H4	Histone H4	1.41875	0.851539	Yes	1.48548	0.852532	Yes	1.32064	0.673724	Yes	10.8619	10.6486	11.0655	10.622	10.8043	10.4872	9.33075	9.81338	9.30207	10.8112	10.5633	10.6639	10.3713	11.3281	10.4699	10.374	9.19662	9.43238	9.47059	9.84918	10.9069	9.79971	11.2149	11.5368	10.8336	11.2165	11.2665	10.8345	10.5106	10.9322	9.87917	10.3002	9.90204	11.3363
HABP2	Q14520	HABP2	Hyaluronan-binding protein 2	0.442395	0.69626	No	0.595176	-0.607724	No	0	0.767401	No	NaN	NaN	5.77552	6.32112	NaN	NaN	4.04368	4.63574	6.06838	NaN	NaN	NaN	NaN	5.19971	5.58587	6.33758	4.26887	NaN	4.01458	6.13483	6.63078	6.18072	NaN	NaN	NaN	NaN	5.63266	NaN	NaN	NaN	NaN	NaN	4.86526	5.84788
HADH	Q16836	HCDH	Hydroxyacyl-coenzyme A dehydrogenase, mitochondrial	0.613474	-0.397925	No	0.467612	-0.234744	No	0.526247	0.230205	No	7.38409	6.98024	7.56404	6.36381	6.90458	6.80075	7.75017	7.88709	7.52493	7.22343	6.44935	6.45312	7.40136	7.19398	6.46022	7.23668	6.57472	7.42995	7.1104	6.87581	7.26998	7.34232	7.45007	7.11292	6.23005	6.92971	6.90759	7.27841	7.19604	6.44865	6.89156	6.84988	6.38063	6.76077
HADHA	P40939	ECHA	Trifunctional enzyme subunit alpha, mitochondrial	0.509563	-0.156191	No	0.287025	-0.0829211	No	0.0400292	0.0103912	No	8.24864	7.96356	7.8911	8.07983	8.20511	8.72797	8.29685	8.0939	8.15366	7.89682	7.95714	7.18071	7.535	8.25085	7.77577	7.96136	8.0476	7.33764	7.64967	7.77901	8.00258	8.34187	8.3239	8.07171	7.31393	8.04457	7.15397	7.36587	8.27281	7.90396	7.37992	7.72862	7.46363	7.46266
HADHB	P55084	ECHB	Trifunctional enzyme subunit beta, mitochondrial	2.22092	-0.560574	No	1.96323	-0.255114	No	0.159857	-0.0923822	No	8.29137	8.27306	8.53926	7.34487	8.12847	9.02427	9.03974	9.16373	7.83941	8.31276	7.68011	7.3069	8.36714	7.79361	8.15507	8.47274	8.12129	7.40885	8.40134	8.17784	8.43496	8.76196	8.61483	8.33334	7.78196	7.60668	7.83196	8.26375	8.47218	8.65527	8.54901	6.9346	8.35978	8.01597
HAGH	Q16775	GLO2	Hydroxyacylglutathione hydrolase, mitochondrial	0.428354	-0.0522184	No	1.03333	-0.196374	No	0.178463	-0.121961	No	7.50426	7.66165	7.88458	7.55603	7.74969	7.55643	7.8414	7.94608	7.65943	7.61397	6.99718	6.1461	7.09123	7.49031	7.8782	7.67641	7.25613	6.42032	7.33173	7.82153	7.6087	8.01927	7.10637	7.26043	6.41571	6.4496	6.72757	6.46453	7.47054	7.24831	7.18081	5.82763	7.56726	5.86143
HAL	P42357	HUTH	Histidine ammonia-lyase	0.463852	-0.790798	No	0.0678072	0.181211	No	1.06679	1.00035	No	5.89199	NaN	7.46575	8.64065	7.66041	7.84039	6.71547	8.00538	7.53768	9.43855	7.49729	8.36717	5.50399	7.63952	5.58429	6.53713	5.70714	5.3402	8.11418	6.53342	8.1282	6.21899	7.19439	8.87155	6.59297	6.69376	8.06229	6.33338	7.35395	6.73496	4.6447	6.12562	6.13816	6.74884
HAPLN1	P10915	HPLN1	Hyaluronan and proteoglycan link protein 1	0.618428	-0.279318	No	2.14803	-0.857012	No	0.518493	-1.03484	No	5.74272	5.51956	5.64866	5.96575	6.05375	5.31594	6.29498	5.99268	6.13836	6.58506	5.31341	NaN	5.87665	5.10999	5.94913	6.32116	6.79183	NaN	6.41565	5.94468	6.51841	7.18483	NaN	NaN	5.84545	NaN	5.18554	5.77757	6.28222	6.57065	7.41381	NaN	5.68686	NaN
HAPLN2	Q9GZV7	HPLN2	Hyaluronan and proteoglycan link protein 2	0.124302	-0.0670679	No	1.68873	-0.557697	No	0.379091	-0.299943	No	8.30036	9.07074	9.27079	8.46187	9.48313	7.59437	9.26968	9.60717	8.82079	9.63023	8.88028	7.68143	8.4795	8.08512	9.07519	7.7608	9.30068	8.76155	8.95996	8.73516	8.95928	8.59186	8.236	8.54255	7.45956	8.83831	7.97818	8.39699	8.50331	9.02079	8.86488	8.39947	8.89698	7.56583
HAPLN4	Q86UW8	HPLN4	Hyaluronan and proteoglycan link protein 4	0.559689	-0.151329	No	0.903368	0.314818	No	0.0822115	-0.128174	No	6.6598	6.65601	6.07312	6.09341	5.35697	6.50775	6.55623	6.55091	6.36382	5.61724	6.24203	NaN	6.52548	5.9936	6.64066	5.82594	5.68557	NaN	5.98695	6.2927	6.12434	5.56406	6.28614	5.72669	NaN	NaN	6.92756	5.32105	6.84562	6.4543	NaN	NaN	6.02499	NaN
HARS1	P12081	HARS1	Histidine--tRNA ligase, cytoplasmic	0.214925	-0.0764353	No	0.0122818	-0.00815765	No	0.9196	0.375605	No	7.88407	8.27328	8.34845	8.12522	8.00644	8.19661	7.9802	8.59656	7.90017	8.3461	8.25003	7.83526	8.25192	7.83033	7.28275	8.08364	7.8832	7.40642	8.09508	7.81515	8.34766	8.03538	7.83641	8.44062	7.69908	8.23613	8.61632	7.65053	7.67263	8.0799	7.56164	7.7754	7.33372	7.80218
HBA1	P69905	HBA	Hemoglobin subunit alpha	0.0580191	0.0533722	No	0.973488	0.61178	No	0.294697	0.144044	No	9.85761	9.687	11.6314	11.6301	11.1158	10.644	10.1239	10.9388	10.7662	11.1822	10.7411	10.8458	10.5019	10.7091	9.97478	10.3293	10.2513	9.24245	10.0387	9.27652	10.0367	10.5857	10.7321	10.5319	10.1147	9.60683	10.8463	9.91791	10.4011	10.83	9.6721	9.82494	9.94261	10.2146
HBB	P68871	HBB	Hemoglobin subunit beta	0.570854	-0.199951	No	0.818319	0.433015	No	0.255745	0.154506	No	11.0661	11.2297	13.3621	12.5027	12.8071	11.5913	11.5963	12.9951	12.6229	13.1619	12.0424	11.7261	12.0731	11.7622	11.1135	11.9466	11.7191	10.584	11.5957	10.6203	11.222	12.3249	11.8838	11.9503	11.4453	10.6823	12.3851	11.5547	11.3854	12.5497	11.0979	10.9638	11.3279	11.6499
HBD	P02042	HBD	Hemoglobin subunit delta	0.373795	0.215239	No	0.864788	0.365063	No	0.121925	-0.0446168	No	8.136	9.80038	10.2423	9.332	9.48743	7.98991	8.72319	9.92922	9.48829	9.79134	9.106	8.45439	9.26131	8.78341	8.15589	8.36947	8.94633	8.10649	8.61452	7.63204	7.91762	8.7231	8.03934	8.54545	7.84977	NaN	8.81778	7.8506	8.12476	8.83101	7.64803	8.38986	8.50116	8.22108
HCLS1	P14317	HCLS1	Hematopoietic lineage cell-specific protein	0.224376	0.268529	No	0.096889	-0.072665	No	0.397295	0.38214	No	5.6028	5.58127	6.68172	6.41994	6.24815	3.89218	6.68887	6.08474	6.0218	6.50364	6.51811	NaN	NaN	7.73622	NaN	6.453	NaN	NaN	6.58059	7.5852	6.20128	6.74935	5.95834	6.31788	6.15939	NaN	6.79417	NaN	5.85439	5.65755	NaN	NaN	NaN	NaN
HCN2	Q9UL51	HCN2	Potassium/sodium hyperpolarization-activated cyclic nucleotide-gated channel 2	0.71263	0.43688	No	0.263845	-0.272596	No	0	NaN	No	NaN	6.18654	5.85137	5.94581	6.13994	NaN	5.31901	5.10542	6.24495	5.70676	NaN	NaN	NaN	5.67187	6.46991	5.8552	4.03505	NaN	6.24937	6.41428	5.99703	6.40346	NaN	NaN	NaN	NaN	NaN	NaN	NaN	5.38682	NaN	NaN	5.7281	NaN
HDHD3	Q9BSH5	HDHD3	Haloacid dehalogenase-like hydrolase domain-containing protein 3	0.363906	-0.0461868	No	0.199678	0.096524	No	0	0.517267	No	7.50317	NaN	8.40978	8.02252	7.81791	NaN	8.608	8.46688	8.14479	7.77709	NaN	NaN	NaN	8.60423	NaN	7.89512	NaN	NaN	NaN	8.36004	6.96293	7.94626	NaN	8.19024	NaN	NaN	NaN	NaN	7.85353	7.67297	NaN	NaN	NaN	NaN
HDLBP	Q00341	VIGLN	Vigilin	1.02071	0.405953	No	1.26756	0.612751	No	0	1.0083	No	8.19385	8.5264	7.81056	NaN	NaN	NaN	8.18171	7.34336	NaN	NaN	9.41469	7.40625	7.84208	7.63022	NaN	8.14885	8.03766	7.16955	7.75763	6.86252	NaN	7.55098	8.6641	7.62901	NaN	NaN	8.67923	NaN	7.65581	NaN	7.43985	NaN	NaN	NaN
HEBP1	Q9NRV9	HEBP1	Heme-binding protein 1	1.13819	-0.541455	No	1.80106	-0.334918	No	1.22839	-0.555972	No	6.30165	5.92673	7.04411	6.31399	6.23111	7.00733	7.21779	7.19957	6.8404	6.25979	NaN	NaN	6.10288	6.50894	6.20561	6.33601	6.27304	NaN	6.47726	6.71826	6.45348	6.84412	6.66236	6.47098	5.39088	NaN	6.35043	5.31612	6.79038	6.94331	6.56357	NaN	6.44888	6.22449
HECTD3	Q5T447	HECD3	E3 ubiquitin-protein ligase HECTD3	1.71571	-0.777092	No	0.474037	-0.132814	No	0	-0.523169	No	5.8188	4.31489	5.14248	5.7459	5.63239	NaN	5.43729	6.11739	6.385	6.00434	5.71942	5.29974	6.15403	5.68644	5.48282	5.43484	5.75085	NaN	5.8852	5.8962	5.71272	5.89665	4.94363	5.39028	NaN	4.70951	4.48566	NaN	NaN	NaN	NaN	NaN	5.00883	NaN
HECW2	Q9P2P5	HECW2	E3 ubiquitin-protein ligase HECW2	0	NaN	No	0	0.323954	No	NaN	0	No	NaN	NaN	NaN	NaN	NaN	NaN	4.35687	3.01774	5.0821	NaN	NaN	NaN	NaN	4.72385	NaN	5.43494	NaN	NaN	NaN	4.39989	NaN	NaN	NaN	NaN	NaN	NaN	NaN	NaN	NaN	NaN	NaN	NaN	NaN	NaN
HEPACAM	Q14CZ8	HECAM	Hepatic and glial cell adhesion molecule	1.05382	-0.10128	No	0.641641	-0.262019	No	1.02764	-0.586044	No	9.45043	9.36326	9.93713	8.97427	9.654	9.53201	9.55144	9.96418	8.96221	9.87566	9.81939	8.01752	9.55862	8.79618	9.77702	10.1003	9.66296	8.40322	9.89131	9.68872	9.37892	10.6161	9.46251	9.83971	9.71047	8.53366	9.88075	10.3796	9.87343	11.3442	10.1927	8.99465	11.0413	9.87678
HGS	O14964	HGS	Hepatocyte growth factor-regulated tyrosine kinase substrate	1.22268	-0.336177	No	1.80609	-0.526974	No	0.241006	0.179457	No	NaN	6.51399	7.53595	7.36195	7.54614	6.26967	6.72357	7.63062	7.96411	7.98444	6.55295	6.36834	6.50694	6.83706	6.71812	7.41223	7.2118	NaN	7.33847	7.01169	7.42975	7.67047	6.89862	7.20273	NaN	NaN	6.79858	NaN	6.94614	NaN	NaN	5.8037	6.39214	NaN
HIBADH	P31937	3HIDH	3-hydroxyisobutyrate dehydrogenase, mitochondrial	1.01261	-0.532634	No	0.098004	0.0342281	No	0.854808	-0.529249	No	6.45589	5.24411	6.93977	6.40952	6.43515	6.60401	6.71397	7.04238	6.8805	6.90675	6.27151	6.75387	6.66459	6.34466	6.91522	6.72876	6.61052	6.66334	6.23098	6.5704	6.57202	6.82597	6.69328	6.6286	5.64152	NaN	6.39219	6.05993	6.94257	6.89526	6.68338	6.35991	6.14734	7.3932
HIBCH	Q6NVY1	HIBCH	3-hydroxyisobutyryl-CoA hydrolase, mitochondrial	2.07636	-0.517429	No	0.865806	-0.270296	No	0.238515	-0.122849	No	7.63649	6.70039	6.95656	6.70907	7.10206	7.95335	7.38238	7.80852	7.12524	7.42222	6.28867	6.4311	6.91499	6.91279	6.35478	7.26349	6.96803	6.52046	7.12535	6.78564	7.13237	7.25574	7.19442	7.26922	6.1084	6.66439	6.71255	6.59402	7.21843	7.65895	7.11531	6.30933	6.65021	6.32787
HIF1AN	Q9NWT6	HIF1N	Hypoxia-inducible factor 1-alpha inhibitor	0	NaN	No	0	NaN	No	NaN	0	No	5.49718	NaN	NaN	3.75719	NaN	NaN	NaN	NaN	NaN	5.98535	5.33884	NaN	NaN	NaN	NaN	NaN	NaN	NaN	NaN	NaN	5.94344	NaN	NaN	NaN	NaN	NaN	NaN	NaN	NaN	NaN	NaN	NaN	NaN	NaN
HINT1	P49773	HINT1	Adenosine 5'-monophosphoramidase HINT1	1.46704	-0.484591	No	0.257865	-0.101134	No	0.333258	-0.186596	No	8.01714	7.95385	8.75279	7.29687	8.01371	8.45828	8.87554	8.72781	7.91148	8.48422	7.36618	7.59227	8.2011	8.00299	7.99521	7.96226	7.81144	7.18785	7.83693	8.15999	8.37701	8.35359	7.61001	7.70466	7.16196	7.56091	7.53445	7.74288	7.94461	8.41883	8.13472	7.28989	7.34786	7.29854
HINT3	Q9NQE9	HINT3	Adenosine 5'-monophosphoramidase HINT3	0.49667	-0.208078	No	1.73977	-0.265754	No	0.804354	-0.245971	No	8.60731	8.69638	9.08211	8.75772	8.48436	8.21428	9.10378	9.0935	9.42288	8.83384	7.72285	NaN	7.98926	8.78893	8.81874	8.96327	7.96692	NaN	8.499	9.08258	8.9212	9.14212	7.94447	7.62214	NaN	NaN	8.40819	8.15902	8.18828	8.23721	7.79654	NaN	8.4378	8.25442
HIP1R	O75146	HIP1R	Huntingtin-interacting protein 1-related protein	0.487164	-0.106321	No	1.21652	-0.240036	No	0.337531	-0.108229	No	7.86842	7.33874	7.43577	7.62591	7.35461	7.85462	7.81277	7.52502	7.57233	7.3903	7.73824	7.14238	7.27142	7.04685	7.58562	7.4972	7.95015	7.27746	7.45411	7.73039	7.53574	7.77408	7.04122	7.23791	7.37662	7.01877	7.31199	7.37328	7.41172	7.81816	7.4406	6.64433	7.30615	7.3882
HK1	P19367	HXK1	Hexokinase-1	2.61124	-0.529697	No	1.48149	-0.270761	No	1.23841	-0.380095	No	11.6988	11.7242	11.8062	11.298	11.3375	12.2525	12.3333	12.3001	12.0295	11.5977	11.2172	10.9301	11.5551	11.4433	11.7111	11.5541	11.6837	11.481	11.4765	11.5789	11.9666	11.8487	11.2947	11.1935	10.8072	11.0235	11.3349	11.7272	11.7289	11.7603	11.7499	11.2646	11.6339	11.5239
HLA-A	P04439	HLAA	HLA class I histocompatibility antigen, A alpha chain	0.229932	-0.207579	No	0.879579	-0.405898	No	0.753775	0.255166	No	NaN	NaN	6.98945	NaN	6.30356	NaN	7.17283	6.92152	6.45999	6.78665	NaN	NaN	6.90212	NaN	NaN	6.38094	6.60916	NaN	7.22266	NaN	6.30022	6.8722	6.96099	6.92922	NaN	NaN	6.16219	NaN	6.77835	6.60153	NaN	NaN	NaN	NaN
HMGB1	P09429	HMGB1	High mobility group protein B1	1.99365	0.526476	No	0.0970542	-0.11984	No	0.462759	1.10214	No	NaN	5.31738	6.92089	6.29587	6.86267	NaN	5.05006	6.38164	5.66667	6.19253	6.98165	NaN	5.35259	6.11778	4.78079	6.49823	5.92312	NaN	6.69703	5.52363	5.61362	6.57285	7.03125	5.27055	NaN	5.91849	NaN	NaN	5.26665	NaN	NaN	5.47881	NaN	NaN
HMGCS1	Q01581	HMCS1	Hydroxymethylglutaryl-CoA synthase, cytoplasmic	0	1.03079	No	0	-0.0398469	No	0	NaN	No	NaN	5.11444	5.67723	NaN	NaN	NaN	NaN	4.64644	6.40997	NaN	NaN	NaN	NaN	NaN	6.5684	6.21141	NaN	NaN	6.91639	5.27523	NaN	6.25126	NaN	NaN	NaN	NaN	5.99285	NaN	NaN	NaN	NaN	NaN	NaN	NaN
HMOX1	P09601	HMOX1	Heme oxygenase 1	0.223826	-0.369846	No	0	-0.321742	No	0	0.493536	No	NaN	NaN	4.13727	6.09576	4.69204	NaN	NaN	4.83988	5.31087	5.88386	5.57427	6.42885	NaN	5.31815	NaN	4.99263	NaN	NaN	5.65184	5.63989	5.61683	NaN	5.34351	5.65197	NaN	NaN	5.57335	NaN	4.84997	NaN	NaN	NaN	NaN	NaN
HMOX2	P30519	HMOX2	Heme oxygenase 2	1.25117	-0.305412	No	0.284522	0.0482117	No	0.0585462	0.033278	No	5.83728	6.33207	6.17066	6.29432	6.54652	6.39707	6.64549	6.72094	6.27819	6.66621	6.08533	6.38746	6.69412	6.61466	6.36075	6.99816	6.2319	NaN	6.61632	6.62412	6.31599	6.72363	6.37865	6.35805	5.91111	6.59324	5.91273	5.96605	6.01713	6.9264	6.52076	6.17923	5.5136	5.76303
HNRNPA0	Q13151	ROA0	Heterogeneous nuclear ribonucleoprotein A0	2.86947	1.43985	Yes	2.08741	1.00588	Yes	0.889707	1.37406	No	7.42365	6.27377	6.54477	6.1514	7.1589	6.24874	4.95809	5.09309	5.02181	5.03152	6.50618	5.29594	6.28035	6.74095	6.50507	7.18244	5.81485	NaN	5.90213	5.49109	5.31519	5.66235	7.59719	6.3726	6.26148	7.5841	7.09229	6.79222	6.50524	NaN	NaN	NaN	5.43612	NaN
HNRNPA1	P09651	ROA1	Heterogeneous nuclear ribonucleoprotein A1	2.67998	0.83144	Yes	2.03558	0.951056	Yes	2.6928	1.22203	Yes	7.75854	7.91977	8.33522	7.43029	8.17814	7.32777	6.93154	7.2279	6.53333	7.44423	8.38036	7.38929	7.66333	8.25644	7.55004	7.85525	6.42016	6.43741	7.41222	7.35406	6.89877	6.86574	8.50141	8.09059	6.92565	7.5609	8.46168	7.8576	7.15983	6.70051	6.19139	6.79685	6.36681	6.85025
HNRNPA2B1	P22626	ROA2	Heterogeneous nuclear ribonucleoproteins A2/B1	3.18241	1.22527	Yes	3.40397	1.21541	Yes	3.84672	1.20406	Yes	10.8081	10.9789	11.3403	10.5764	10.9307	9.8289	9.70867	9.6537	9.57152	9.74525	10.9147	10.051	10.5406	11.4274	10.6485	10.9685	9.38218	8.47614	9.32259	10.0905	10.0135	9.9732	11.3661	11.0309	10.2567	10.3368	11.6908	10.9055	10.162	10.0993	9.32926	9.10585	9.98565	9.6804
HNRNPA3	P51991	ROA3	Heterogeneous nuclear ribonucleoprotein A3	2.36459	1.42639	Yes	3.54418	1.35614	Yes	3.34629	1.65566	Yes	8.66336	9.19942	9.87864	8.7238	9.75621	7.89738	7.64998	7.77863	7.74228	8.0212	8.76155	8.51817	9.1982	9.34243	8.83806	9.57846	7.72031	6.5861	7.75984	8.03858	7.94479	8.0504	9.52884	9.3185	8.53388	8.56485	9.67894	9.28388	7.70375	8.0253	7.29861	7.2046	7.12189	7.62075
HNRNPC	P07910-2	HNRPC	Heterogeneous nuclear ribonucleoproteins C1/C2	3.56081	1.68759	Yes	4.48646	1.42163	Yes	3.39439	1.22444	Yes	11.2004	11.2089	10.9088	10.1633	10.5822	9.8744	9.0804	9.04077	8.56703	9.06306	10.91	9.87607	10.7855	10.921	10.2923	10.6498	9.26759	8.531	8.99625	9.78756	8.91764	9.40485	11.245	10.6109	10.1702	10.985	10.6888	10.1516	9.81417	9.93614	8.99572	9.34355	9.22747	9.1878
HNRNPD	Q14103	HNRPD	Heterogeneous nuclear ribonucleoprotein D0	1.47057	1.30352	Yes	2.5153	1.11277	Yes	1.40096	1.04535	Yes	9.19092	8.28202	10.1954	9.37664	9.5364	6.92661	8.3608	8.19631	8.32269	8.25738	9.155	8.60668	9.47292	9.2192	8.75794	10.1972	NaN	NaN	8.42888	8.43202	7.41848	8.91679	9.25613	9.48833	9.49554	8.60752	9.08426	7.73376	7.86674	8.24637	8.09904	NaN	NaN	7.58023
HNRNPDL	O14979	HNRDL	Heterogeneous nuclear ribonucleoprotein D-like	1.24749	0.520206	No	1.22098	1.23575	No	1.15679	0.992019	No	5.80289	6.61108	6.01629	5.6269	6.23146	NaN	5.83714	5.54876	5.57303	5.44597	6.38446	5.6355	6.28053	6.87837	5.64496	7.30106	NaN	NaN	4.41629	6.03536	NaN	6.30106	6.30948	6.61114	5.43147	6.63601	6.6551	5.91984	5.00785	5.37697	NaN	NaN	NaN	5.47958
HNRNPF	P52597	HNRPF	Heterogeneous nuclear ribonucleoprotein F	2.23419	0.728942	Yes	0.46882	0.114199	No	1.52743	0.550054	No	9.01083	8.3843	7.55653	7.1069	6.81102	8.72041	7.32266	6.61367	6.34597	6.22216	8.23033	7.16076	7.02335	7.6607	7.13576	6.69425	8.08738	7.41723	6.88906	7.18935	7.24513	6.39181	8.5843	7.4908	6.87478	8.64943	6.98327	6.97131	7.56996	7.11784	6.92455	7.50444	6.57483	6.56196
HNRNPH1	P31943	HNRH1	Heterogeneous nuclear ribonucleoprotein H	2.07615	0.842526	Yes	2.55713	0.672221	Yes	2.69553	0.788461	Yes	9.51875	8.88397	8.45891	7.3062	7.6187	9.16444	7.79133	7.16545	6.76858	6.68411	8.98419	7.77966	7.91581	8.4773	7.90275	7.66291	7.99212	6.87786	7.25604	7.80563	7.22177	7.53586	9.14419	8.29581	7.62761	9.05263	8.50392	7.81061	8.08488	7.65071	7.39525	8.23765	7.34983	6.98567
HNRNPH2	P55795	HNRH2	Heterogeneous nuclear ribonucleoprotein H2	2.51697	1.11951	Yes	3.0396	1.03259	Yes	2.55559	1.26242	Yes	9.23918	8.7753	9.44945	8.17046	9.0244	8.77514	7.62871	7.95361	6.97995	7.72381	8.82856	8.06335	8.84251	8.58919	8.18127	8.86553	7.5841	6.53194	7.66729	7.87972	7.62894	7.88286	9.82212	8.74308	7.76235	9.09409	9.10426	8.41346	8.07469	8.02352	7.2722	7.17624	7.63816	7.18004
HNRNPH3	P31942	HNRH3	Heterogeneous nuclear ribonucleoprotein H3	2.05286	1.16854	Yes	3.02405	1.08575	Yes	2.22495	1.1876	Yes	8.65191	8.43406	8.94108	7.44744	8.03581	8.12901	6.91116	7.20355	6.80286	6.62098	8.49424	7.78461	8.37905	8.05576	8.06614	8.53424	7.21868	6.50029	6.73455	7.40421	7.3463	7.59553	8.82998	8.13182	7.4108	8.37551	8.8321	8.61712	7.23189	7.92738	6.83799	6.64976	7.26852	7.15617
HNRNPK	P61978	HNRPK	Heterogeneous nuclear ribonucleoprotein K	2.48639	0.879589	Yes	3.45946	0.872588	Yes	3.25659	1.18433	Yes	9.51373	10.0504	10.0195	9.45885	9.85291	9.07269	8.95206	8.83603	8.78714	8.84954	9.74869	8.91311	9.58444	10.0559	9.19781	10.328	8.59905	8.10204	8.63195	9.10882	8.78097	9.36952	9.84455	9.93159	9.00782	9.14514	10.273	10.2546	8.57656	9.09729	8.27941	8.05361	8.76141	8.58241
HNRNPL	P14866	HNRPL	Heterogeneous nuclear ribonucleoprotein L	3.15174	1.17454	Yes	2.26332	1.21953	Yes	3.88494	1.10358	Yes	7.50048	7.15967	7.92259	6.81604	7.72014	6.24646	5.93513	6.35865	5.98813	6.71787	6.75791	6.62311	8.1377	7.47862	7.17737	8.10327	6.33229	NaN	6.55181	6.37201	5.49688	6.80421	7.44116	7.84739	7.02599	6.71812	6.71134	6.81557	6.30989	6.89699	5.96937	5.2174	5.47829	6.06618
HNRNPM	P52272	HNRPM	Heterogeneous nuclear ribonucleoprotein M	4.06713	2.04557	Yes	4.51964	1.79995	Yes	3.86865	1.62504	Yes	9.3581	9.46029	9.08912	8.2557	8.6377	7.23952	7.11853	6.83437	6.40934	6.97129	8.8868	8.63849	9.04082	8.72727	8.76945	9.38937	6.56124	6.71382	7.3061	7.07978	7.36321	7.62834	8.58664	8.65293	8.95512	8.9709	9.3822	9.21938	6.86858	7.75178	7.37873	7.01356	7.5028	7.50148
HNRNPR	O43390	HNRPR	Heterogeneous nuclear ribonucleoprotein R	2.48483	0.924366	Yes	1.40549	0.674572	Yes	2.3503	1.76191	Yes	7.02473	6.40384	7.06376	6.32638	6.52205	6.22839	5.89379	5.66174	5.45462	5.48039	6.96599	6.13266	6.70465	6.86789	6.20525	7.11362	6.64869	6.27894	5.44848	5.92027	5.87447	5.77179	6.95205	6.84401	7.22446	7.20921	7.13427	6.70592	5.75128	4.31297	4.9357	NaN	5.28843	5.76281
HNRNPU	Q00839	HNRPU	Heterogeneous nuclear ribonucleoprotein U	3.77931	1.73913	Yes	3.38911	1.2836	Yes	3.03389	1.58529	Yes	8.43365	8.63293	8.61267	7.57512	8.44719	6.95611	6.5815	6.58358	5.91688	6.96783	7.83131	7.40688	8.03927	8.34815	7.51177	8.51955	6.08925	6.50972	6.83678	6.78707	6.70418	7.02834	8.69922	8.1991	7.57981	7.79271	8.43466	7.85207	6.70414	6.80951	6.67521	6.59986	6.00029	6.25681
HNRNPUL1	Q9BUJ2	HNRL1	Heterogeneous nuclear ribonucleoprotein U-like protein 1	0	2.12215	No	0	NaN	No	0	NaN	No	6.68561	NaN	4.99804	NaN	5.55081	NaN	NaN	NaN	NaN	3.42866	5.28399	NaN	NaN	6.33398	NaN	6.92252	NaN	NaN	6.44046	NaN	NaN	NaN	7.25148	NaN	NaN	NaN	6.14654	NaN	NaN	NaN	NaN	NaN	NaN	NaN
HNRNPUL2	Q1KMD3	HNRL2	Heterogeneous nuclear ribonucleoprotein U-like protein 2	1.41857	2.68433	Yes	2.764	1.20432	Yes	1.84858	1.2032	Yes	6.92717	6.97549	6.83013	6.28535	7.07774	4.02234	0.950681	5.30963	5.00968	5.38192	5.95042	6.11152	6.891	6.65985	6.74842	6.66523	4.75475	NaN	5.37304	5.66131	NaN	5.56011	6.74375	6.4835	6.95934	5.79956	7.08017	7.13626	5.97638	5.4107	5.85188	NaN	5.21499	NaN
HOMER1	Q86YM7	HOME1	Homer protein homolog 1	0.406332	0.247635	No	0.354248	-0.102395	No	0.129502	0.160289	No	7.13927	7.73688	7.89064	7.08797	7.41998	5.87335	7.89141	7.82197	7.13077	7.31907	7.25442	6.73175	7.21333	7.27054	7.39882	7.3571	7.45506	6.79897	6.93067	7.84325	7.25245	7.55993	7.28131	6.62774	6.09165	5.97584	7.35231	5.88382	6.20665	6.7014	7.0116	4.92303	6.13519	7.27306
HOMER2	Q9NSB8	HOME2	Homer protein homolog 2	0.475042	-0.3924	No	0.227374	-0.133996	No	0	NaN	No	5.78488	5.10284	4.93174	5.85018	5.92537	6.65058	6.12525	5.79389	5.95023	5.03706	6.28642	NaN	4.84709	5.78945	5.9	5.722	6.14804	NaN	5.69504	6.17276	5.98783	5.21128	NaN	NaN	NaN	NaN	5.29238	NaN	NaN	5.32126	5.76533	NaN	NaN	NaN
HOOK3	Q86VS8	HOOK3	Protein Hook homolog 3	0.118793	-0.11173	No	0.515567	-0.0424106	No	0.103547	0.137629	No	5.69578	5.53444	5.65693	5.9416	6.80902	6.07726	6.73082	5.21434	6.13863	6.03537	6.11287	NaN	6.11242	6.10283	5.95496	6.17526	6.0698	NaN	6.24971	6.11499	5.9422	6.29369	6.10887	5.85919	NaN	NaN	5.98491	NaN	NaN	6.11919	5.69952	NaN	5.44965	4.39071
HOXD10	P28358	HXD10	Homeobox protein Hox-D10	1.31762	0.798559	Yes	0.606781	1.10703	No	0	NaN	No	NaN	NaN	6.55738	5.51337	6.67054	6.41256	NaN	5.39833	4.85378	6.0935	NaN	NaN	NaN	6.4408	6.03967	6.36304	NaN	NaN	NaN	NaN	5.38569	4.80297	NaN	5.42628	NaN	NaN	4.8212	NaN	7.00484	NaN	NaN	NaN	NaN	NaN
HP	P00738	HPT	Haptoglobin	0.673264	-0.363097	No	0.262261	0.190657	No	0.467559	0.378153	No	5.0403	5.13351	6.77828	6.77805	6.54081	6.0238	6.00016	6.48239	7.00341	6.57669	6.00345	5.97154	6.25817	6.35216	6.09014	5.17764	5.47165	4.83919	6.8375	5.60112	6.68734	5.27235	6.12826	6.7011	4.73065	NaN	6.57025	4.9482	5.83856	6.15631	3.54652	5.44906	5.8053	5.84101
HP1BP3	Q5SSJ5	HP1B3	Heterochromatin protein 1-binding protein 3	0.219649	0.293397	No	1.52442	0.814436	Yes	1.32449	0.670157	Yes	6.60121	5.82346	4.96104	6.10136	5.9454	NaN	4.56931	6.0547	5.32953	5.70414	6.14436	6.41091	6.43732	6.23942	5.91756	5.84237	NaN	NaN	5.6187	4.84302	5.47513	5.24208	6.70404	6.05292	6.17302	6.55114	5.93559	6.13999	NaN	5.68222	NaN	5.76879	5.07817	NaN
HPCA	P84074	HPCA	Neuron-specific calcium-binding protein hippocalcin	0.202655	-0.0561042	No	0.316535	-0.0876296	No	0.026343	0.0181024	No	8.16547	8.10081	7.72246	7.90482	7.83005	7.91871	8.02396	7.85833	8.29539	7.90773	7.22996	6.91759	6.97023	7.8809	7.92126	7.94116	7.55356	6.97522	7.47256	7.87352	7.63454	7.87747	6.92004	6.85088	7.08914	6.53578	7.46387	7.11832	7.28552	7.03034	7.90659	6.18707	7.0586	6.4013
HPCAL4	Q9UM19	HPCL4	Hippocalcin-like protein 4	0.186775	-0.344092	No	0.0200098	0.0306188	No	0.484617	0.748371	No	NaN	NaN	5.90009	6.65677	6.87065	6.25559	6.47149	6.37716	8.05812	6.02451	6.27426	NaN	NaN	7.72581	NaN	6.63956	7.04079	NaN	6.27924	6.83232	6.98743	6.67466	5.8496	6.66256	NaN	NaN	6.67079	6.28934	NaN	5.49101	5.85097	NaN	6.34559	NaN
HPRT1	P00492	HPRT	Hypoxanthine-guanine phosphoribosyltransferase	2.27182	-0.526288	No	0.310252	-0.0762239	No	0.27853	-0.105999	No	9.22592	9.70456	10.1568	10.0104	9.72903	9.69802	10.5943	10.5493	10.5362	10.0804	9.68864	9.29049	9.61232	10.109	9.54686	9.681	9.74098	9.35954	9.71346	9.75165	9.96054	9.85952	9.42707	9.22666	8.92757	9.11178	9.62985	9.55198	9.80634	9.0028	9.62563	9.15204	9.7008	9.22329
HPX	P02790	HEMO	Hemopexin	0.180095	0.241057	No	0.0157934	0.0168282	No	0	NaN	No	NaN	NaN	6.02804	8.16845	7.35429	6.0446	6.17207	6.40673	8.23494	6.18593	7.65522	NaN	5.96897	7.88952	6.04563	5.97837	7.1619	NaN	7.06886	7.18353	6.57547	5.46382	NaN	7.27472	NaN	NaN	6.68393	NaN	5.92748	NaN	NaN	NaN	NaN	NaN
HRAS	P01112	RASH	GTPase HRas	1.29391	-0.233282	No	0.374922	-0.334001	No	0.420569	-0.139357	No	7.54668	8.18891	8.35831	8.32598	8.51499	7.89364	8.59219	8.3473	8.68197	8.58617	6.2688	NaN	7.31893	8.30565	8.62438	8.11029	7.80768	6.93103	7.94989	8.36483	7.88536	8.2903	8.11583	7.39791	NaN	5.21421	7.12173	6.93448	8.02493	NaN	NaN	NaN	7.45875	7.10643
HSD17B10	Q99714	HCD2	3-hydroxyacyl-CoA dehydrogenase type-2	0.931878	-0.180835	No	0.106455	0.0494599	No	0.0900783	-0.0787459	No	8.83589	8.09177	7.79174	7.44817	7.22039	8.83349	8.20757	7.96221	7.54242	7.74643	8.3078	7.24007	8.01277	8.66376	7.27203	7.32673	8.04933	7.168	7.91507	7.98061	7.66873	7.74466	8.26922	7.51745	6.65645	8.63335	7.03567	6.93345	7.53956	7.45723	7.71453	7.76891	7.42064	7.6172
HSD17B4	P51659	DHB4	Peroxisomal multifunctional enzyme type 2	1.85073	-0.291196	No	0.0510116	0.0366118	No	1.32637	0.438165	No	7.72814	7.03681	7.59675	7.09654	7.39799	7.94467	7.24885	7.72815	7.4695	7.92104	7.74898	7.7417	6.9986	7.78641	6.95679	7.38483	7.3738	7.14249	7.79998	7.09962	7.45095	7.5308	8.03664	7.83423	6.63423	7.59384	7.46881	7.35168	7.22329	7.37424	6.85559	6.92692	6.68917	7.22122
HSD17B8	Q92506	DHB8	(3R)-3-hydroxyacyl-CoA dehydrogenase	0.0727104	-0.0871163	No	0.336275	-0.121108	No	1.00981	0.197159	No	7.99136	6.1771	7.05436	7.61018	7.78482	7.61202	7.90308	6.74437	7.59918	7.19476	7.40276	7.24736	7.24711	7.47714	8.00259	7.73307	7.74189	7.24312	7.91856	7.21376	7.72662	7.99274	NaN	7.6622	7.23587	8.04834	7.68274	7.57344	7.38476	7.46846	7.34048	7.6927	7.26919	7.44598
HSDL2	Q6YN16	HSDL2	Hydroxysteroid dehydrogenase-like protein 2	0.184723	-0.180719	No	0.916481	-0.2135	No	0.435498	-0.239316	No	7.91826	8.1746	8.17082	6.86726	7.17717	6.69519	8.51638	8.39999	7.83711	7.76302	7.70346	NaN	7.82749	8.23496	7.33281	8.07351	7.71463	7.32461	8.20915	8.23163	7.88273	8.2016	7.69622	8.11469	7.48813	7.13674	7.07355	7.79658	7.88576	8.75627	7.89179	NaN	7.68039	7.15153
HSP90AA1	P07900	HS90A	Heat shock protein HSP 90-alpha	2.73732	-0.449774	No	1.36351	-0.206319	No	0.898711	-0.168358	No	9.24378	9.56935	10.1247	9.97337	9.84755	9.74368	10.2092	10.4257	10.4484	10.1807	9.14908	9.00353	9.59341	9.7105	9.53304	9.69042	9.40824	9.09857	9.81309	9.62172	9.81948	10.1568	9.40617	9.39674	8.79568	8.76128	9.15866	8.87841	9.48876	9.41186	9.37126	8.81972	9.1519	9.1636
HSP90AB1	P08238	HS90B	Heat shock protein HSP 90-beta	1.87101	-0.340981	No	1.77076	-0.144163	No	0.471565	0.163864	No	11.3887	11.6912	11.9791	11.7006	11.6901	11.7675	12.1269	12.0698	12.2594	11.9311	11.2894	10.9606	11.5408	11.4708	11.5387	11.9685	11.4233	11.0639	11.864	11.5377	11.5894	12.1554	11.46	11.5619	10.8727	11.5291	11.4358	11.3475	11.2379	11.4567	11.3997	10.9192	11.1922	11.018
HSP90B1	P14625	ENPL	Endoplasmin	1.75944	0.247085	No	1.66095	0.392248	No	2.36317	0.664441	Yes	10.0747	10.0932	10.6156	10.2368	9.95391	9.83114	9.99738	10.1522	10.0849	9.67316	9.98894	9.13256	10.4309	10.2136	9.94356	10.9878	9.23475	9.17321	10.1408	9.6517	9.73671	10.4067	10.3002	9.8947	10.0088	10.384	9.32772	9.63933	9.38691	9.44414	9.76215	9.22441	8.64964	9.10082
HSPA12A	O43301	HS12A	Heat shock 70 kDa protein 12A	1.91117	-0.77713	No	0.781761	-0.308537	No	2.36858	-0.557443	No	8.74038	8.64276	9.63439	9.35694	9.62483	9.38198	10.0821	10.3145	10.1233	9.98313	8.1374	8.08855	9.33377	9.588	9.01621	9.51361	9.02465	8.2833	8.99598	9.55224	9.76141	9.91119	8.96987	8.54686	7.76962	7.69905	8.93978	8.64727	9.38494	9.21414	8.81615	8.2372	9.1988	9.06586
HSPA1A	P0DMV8	HS71A	Heat shock 70 kDa protein 1A	2.07429	-0.32096	No	0.357031	-0.0663169	No	0.442812	-0.139603	No	13.6442	13.7904	14.2424	14.1705	13.7806	14.0411	14.1848	14.3347	14.4273	14.245	13.5479	13.7907	13.9359	13.6519	13.5568	14.1256	13.6892	13.5189	14.2069	13.6383	13.7608	14.1924	13.8148	14.1045	13.2316	13.1909	13.7519	13.2599	14.0133	13.768	13.6817	13.3719	13.5723	13.7841
HSPA1L	P34931	HS71L	Heat shock 70 kDa protein 1-like	0.375634	-0.143735	No	1.04444	-0.165039	No	0.1346	0.200703	No	8.8706	NaN	9.38278	9.63848	9.72947	8.72936	9.91116	9.69904	10.1296	9.63832	9.21007	9.41716	9.49052	9.39382	9.31786	9.3349	9.1727	9.49794	9.43486	9.74273	9.68457	9.62177	9.25807	9.83748	8.91998	8.46591	10.3512	8.70904	9.39969	9.27544	NaN	NaN	8.8923	9.78554
HSPA2	P54652	HSP72	Heat shock-related 70 kDa protein 2	0.760563	-0.193303	No	0.130404	-0.0212382	No	0.358726	0.118859	No	8.5965	8.48365	9.05684	8.88322	9.21922	8.93768	8.80668	8.96549	8.80296	9.69314	8.74527	8.38008	8.57961	8.72638	8.55036	9.19033	8.63842	8.29212	8.80925	8.77991	8.70714	9.07261	9.19582	9.39062	8.58342	8.01894	8.64404	9.06636	9.3786	9.43049	8.8913	7.56035	8.12266	8.80264
HSPA4	P34932	HSP74	Heat shock 70 kDa protein 4	1.4766	-0.350354	No	0.653983	-0.0912274	No	0.0343941	-0.0198083	No	8.49179	9.0292	9.13125	8.74092	8.62503	9.0777	9.22395	9.32934	9.38867	8.7503	8.73797	8.19849	8.74605	9.01664	8.84222	8.98099	8.53442	8.3886	8.95337	9.06984	9.06227	9.06122	8.51905	7.89834	7.83592	8.3326	8.51025	8.49001	8.57939	7.92374	8.76599	7.99217	8.35012	8.09361
HSPA4L	O95757	HS74L	Heat shock 70 kDa protein 4L	1.6459	-0.355198	No	1.10731	-0.118794	No	1.13315	-0.317238	No	8.63814	9.29027	9.36829	9.01744	8.91635	9.11517	9.67159	9.50982	9.66095	9.04895	8.66121	7.83126	8.97742	9.35841	9.14965	9.11698	8.53607	8.03994	9.10891	9.48432	9.26527	9.37318	8.88192	8.3523	7.99206	8.3748	8.85528	8.31875	9.17505	8.79219	8.88883	8.23042	9.01688	8.57516
HSPA5	P11021	BIP	Endoplasmic reticulum chaperone BiP	0.129295	0.0886728	No	1.18135	0.604894	No	2.26639	0.840249	Yes	10.9268	11.1397	11.6046	11.4227	11.2383	11.2717	10.9253	10.9205	10.8995	11.8716	11.5275	11.5033	11.0753	11.1089	10.9909	11.6738	10.1158	10.2284	11.1291	10.6755	11.0423	11.0593	11.6687	11.9097	11.2225	11.1069	11.5025	10.854	10.8632	10.8272	10.6353	10.4084	9.93459	10.5542
HSPA6	P17066	HSP76	Heat shock 70 kDa protein 6	0	NaN	No	0	-0.71374	No	0	NaN	No	NaN	NaN	NaN	4.3311	NaN	NaN	NaN	NaN	NaN	NaN	NaN	NaN	NaN	4.99265	NaN	NaN	NaN	NaN	NaN	5.70639	3.46774	NaN	NaN	NaN	NaN	NaN	5.8371	NaN	4.63179	3.76546	NaN	NaN	NaN	NaN
HSPA8	P11142	HSP7C	Heat shock cognate 71 kDa protein	1.30879	-0.277107	No	1.1363	-0.0940113	No	0.569551	-0.102419	No	12.9612	13.755	13.8617	13.4134	13.4731	13.3157	14.0085	13.7661	13.8648	13.8949	13.0819	12.9576	13.3897	13.2209	13.4966	13.3889	13.1753	12.9723	13.5139	13.4152	13.4365	13.5866	13.1528	13.0115	12.9406	12.7905	13.1082	12.7132	13.4227	12.8974	13.249	12.8541	12.9536	12.9544
HSPA9	P38646	GRP75	Stress-70 protein, mitochondrial	0.662918	-0.127497	No	0.0185495	0.00330639	No	0.187948	0.0513055	No	12.5004	12.3394	12.4513	11.9671	12.1623	12.6001	12.6215	12.3894	12.3373	12.1097	11.9959	11.233	12.1784	12.3146	12.3802	12.2893	12.0377	11.4727	12.0466	12.3099	12.2032	12.3013	12.6124	11.9065	11.8432	11.9606	11.6414	11.7675	12.4623	11.9824	12.1758	11.5475	11.6899	11.5658
HSPB1	P04792	HSPB1	Heat shock protein beta-1	0.616419	-0.786659	No	0.0456506	-0.11067	No	0.371862	0.400294	No	8.22169	8.45571	10.1015	10.6027	10.1246	10.321	9.36297	9.99389	9.72542	12.0362	10.0533	10.7556	9.07722	9.93958	8.64951	9.41168	8.59742	8.06001	12.0601	9.79487	10.3239	9.71464	10.1714	11.4495	9.8905	8.76567	10.6498	9.31135	10.3458	10.6962	8.39464	9.00344	8.90443	10.4919
HSPB6	O14558	HSPB6	Heat shock protein beta-6	0.801015	-0.385846	No	1.01061	-0.525653	No	0.585693	-0.459409	No	5.32828	NaN	5.56768	5.48181	5.593	6.23798	4.40501	5.85433	5.9161	5.50575	4.84859	NaN	5.99385	5.68951	5.8983	6.18053	6.29377	NaN	6.20115	6.09115	5.94516	6.70782	5.72536	6.82097	NaN	5.22579	6.2573	6.99707	7.06628	8.01725	5.74915	5.55986	5.97826	6.7019
HSPD1	P10809	CH60	60 kDa heat shock protein, mitochondrial	1.74815	-0.162776	No	0.414898	-0.0604663	No	0.0964702	0.0527104	No	10.3453	10.2623	10.4384	9.901	9.74058	10.5841	10.3763	10.4587	10.1128	9.96953	9.77603	10.0493	9.88496	9.85835	10.059	10.2541	9.79056	10.361	10.0349	9.72314	10.0223	10.3126	10.4417	9.9294	9.93336	10.2436	9.58027	10.2133	10.3964	10.0286	10.6644	9.5926	9.60278	9.74058
HSPE1	P61604	CH10	10 kDa heat shock protein, mitochondrial	0.671537	-0.11951	No	0.0320966	-0.00637881	No	0.027289	0.017314	No	9.88966	9.62617	9.90672	9.488	9.30807	9.94495	9.97882	10.1259	9.58717	9.17933	8.86037	9.53503	9.44453	8.96832	9.28773	9.68269	8.90901	9.59053	9.32281	8.7212	9.36449	9.9089	9.78222	9.38037	9.77103	9.84447	9.02199	10.1286	9.86631	9.65192	10.4226	9.30502	9.20305	9.37589
HSPG2	P98160	PGBM	Basement membrane-specific heparan sulfate proteoglycan core protein	0.216229	0.140559	No	2.18427	0.328818	No	0.36058	-0.163004	No	6.72765	6.38158	7.85973	7.49104	7.03293	7.18784	6.56572	7.28329	6.60478	7.1485	6.89054	6.88836	6.96998	7.5237	7.77565	7.87894	NaN	6.54009	6.79568	6.96984	7.51641	7.57052	6.89051	7.48525	6.88309	7.2697	7.66814	8.43136	7.29619	8.12947	7.5831	7.02457	7.44714	8.12563
HSPH1	Q92598	HS105	Heat shock protein 105 kDa	1.69856	-0.259103	No	1.26719	-0.189492	No	0.589651	-0.172718	No	9.51233	10.1777	10.0515	9.60567	9.46847	9.69621	10.4495	10.1797	10.1258	9.66002	9.07967	8.7987	9.51702	9.74288	9.63848	9.69504	9.29975	9.32146	9.62644	9.79081	9.64991	9.92037	9.51432	8.63396	8.6184	8.9767	9.11246	9.00188	9.53265	8.8618	9.39879	9.06176	9.24106	8.79796
HTRA2	O43464	HTRA2	Serine protease HTRA2, mitochondrial	1.6479	-0.523298	No	0.0297821	0.0175001	No	0.424597	0.725516	No	5.22626	5.37701	4.96216	4.97292	5.12426	5.58296	5.79437	5.99316	5.59675	5.31185	5.64141	NaN	5.59176	5.30586	5.09185	5.50216	5.09896	NaN	5.52466	5.50176	5.69821	5.22195	5.83121	5.78938	NaN	NaN	5.73802	NaN	4.61896	5.55059	NaN	NaN	NaN	NaN
HTT	P42858	HD	Huntingtin	0.200245	-0.351304	No	0.278861	-0.656161	No	0.043469	0.145999	No	5.40996	4.3912	NaN	7.01737	6.11106	6.77326	6.00172	5.5424	6.15647	5.40335	NaN	NaN	NaN	6.40478	NaN	4.88674	NaN	NaN	5.67994	6.34845	6.94756	6.25539	NaN	5.82898	NaN	NaN	6.05081	NaN	NaN	6.65155	NaN	NaN	4.93625	NaN
HUWE1	Q7Z6Z7	HUWE1	E3 ubiquitin-protein ligase HUWE1	0.205049	0.0446243	No	0.119333	0.0298754	No	0.235964	-0.107256	No	7.09126	7.75988	7.6675	7.42914	7.32171	7.20267	7.73027	7.36533	7.5806	7.1675	7.37124	6.68484	7.35464	7.5389	7.63383	7.72326	7.21949	6.43842	7.35085	7.83584	7.38783	7.89503	7.27747	6.84673	7.04147	6.98045	7.50357	7.81201	7.14482	7.17402	7.67785	7.1472	7.79551	7.16583
HYCC2	Q8IXS8	HYCC2	Hyccin 2	0.289844	-0.257566	No	0.0721827	0.0819268	No	0	0.835244	No	4.72748	4.47057	5.00125	4.59521	4.99941	4.56481	5.86948	4.81616	5.37208	4.45921	NaN	NaN	5.29698	3.38599	4.73427	4.70554	4.59742	NaN	4.46739	NaN	5.03307	4.99055	NaN	4.01265	NaN	4.0153	NaN	4.7541	4.4411	NaN	NaN	NaN	NaN	3.91885
HYOU1	Q9Y4L1	HYOU1	Hypoxia up-regulated protein 1	0.716672	0.592411	No	2.49416	0.479653	No	0.952616	0.48547	No	7.98616	7.48712	7.66416	7.17314	7.49695	6.13757	7.46627	7.51483	7.30383	6.42297	7.26839	6.72545	7.93849	7.50317	7.51183	8.29335	6.5087	6.22185	7.27976	7.37307	7.14369	7.83569	8.24017	7.30652	6.86029	7.80813	7.06858	6.85841	6.99874	7.29561	7.26485	6.85796	6.71551	6.09662
IARS1	P41252	SYIC	Isoleucine--tRNA ligase, cytoplasmic	0.146913	-0.109608	No	0.325238	0.298127	No	0	1.30842	No	6.16535	4.21787	5.11596	5.54413	5.16291	5.46801	4.71789	5.43891	5.17645	5.953	5.99835	NaN	5.4963	4.74224	5.36721	5.30262	4.63387	NaN	5.35447	NaN	5.43685	5.54678	6.26403	5.47079	NaN	5.80928	5.32672	NaN	4.95561	NaN	NaN	NaN	NaN	NaN
IARS2	Q9NSE4	SYIM	Isoleucine--tRNA ligase, mitochondrial	0.750885	-0.416367	No	0.182113	0.0764181	No	0.307765	0.353066	No	6.56096	5.90301	6.30459	6.63325	6.7527	6.31445	5.94756	7.54837	7.07006	7.3559	5.92825	NaN	6.73115	6.79354	6.40815	6.70589	6.20968	5.49925	6.06913	6.7282	6.5301	6.64777	6.99143	6.14778	NaN	5.49516	6.15765	NaN	5.79472	6.28468	6.02831	NaN	6.15826	6.64565
ICAM5	Q9UMF0	ICAM5	Intercellular adhesion molecule 5	0.591653	-0.180409	No	0.812222	-0.257368	No	0.371538	-0.179812	No	11.8362	12.4581	11.8029	11.7137	11.3561	11.8878	12.5357	11.673	12.3897	11.5829	11.8168	10.7861	11.6248	11.8321	11.43	11.6702	12.0465	11.4587	11.675	12.3767	11.0679	12.0792	10.5391	10.5665	11.2396	11.1968	10.8371	9.89834	10.6419	10.7903	11.9163	11.3915	11.4549	9.16138
IDE	P14735	IDE	Insulin-degrading enzyme	0.137935	0.139062	No	0.00242057	-0.00388988	No	0.605401	1.08034	No	NaN	5.37682	6.40062	6.43671	5.55492	6.2901	5.77734	5.60277	5.70239	6.13034	5.50842	6.54354	NaN	5.6865	4.71481	4.82137	NaN	NaN	5.63014	4.95667	5.66082	4.61686	6.21195	7.2065	NaN	4.75389	5.77864	NaN	5.5753	5.68248	NaN	NaN	NaN	4.61884
IDH1	O75874	IDHC	Isocitrate dehydrogenase	1.24572	-0.63507	No	0.104499	0.114163	No	0.273554	0.167288	No	5.88366	5.55927	6.65365	6.7142	6.74494	7.09113	6.46786	7.13001	6.51471	7.52738	6.71183	6.72963	5.77956	6.71406	7.02846	6.74654	5.927	NaN	7.18218	6.06569	6.67963	6.55515	6.36411	6.88638	5.869	6.10016	6.38471	5.59929	6.67608	6.70744	5.51695	4.94637	6.12966	6.22343
IDH2	P48735	IDHP	Isocitrate dehydrogenase	1.31971	-0.378512	No	0.00787733	-0.0055569	No	0.0333236	0.025227	No	7.00468	7.42041	7.50018	7.24217	7.44892	7.57396	7.55843	8.31565	7.44349	7.61739	6.97729	7.06269	7.03223	7.20946	6.45222	7.10278	7.37653	6.12095	7.34553	6.87591	7.0813	7.0698	7.38221	7.06349	6.03646	6.67445	6.67561	5.87564	7.50278	6.78377	6.29189	6.60072	5.63084	6.7465
IDH3A	P50213	IDH3A	Isocitrate dehydrogenase	2.84885	-0.594772	No	0.265417	-0.0998147	No	0.435567	-0.142001	No	9.54161	9.11597	9.55954	9.40781	8.81357	10.1117	9.87386	10.337	9.87676	9.21305	8.98087	8.5054	9.27693	9.53424	9.08299	9.32222	9.32711	8.1152	8.94572	9.65933	9.54856	9.70562	9.0259	9.19124	8.56621	9.01345	8.92683	9.22033	9.2805	9.07191	9.11716	8.58995	9.20967	9.52677
IDH3B	O43837	IDH3B	Isocitrate dehydrogenase	2.64428	-0.471261	No	1.9612	-0.431959	No	0.264005	-0.111012	No	6.88247	6.83451	7.00793	6.32554	6.47867	7.39503	7.16223	7.43664	7.03908	6.85245	5.07998	5.56044	6.49873	6.71339	6.47165	6.75107	5.89475	6.0621	6.55555	6.93109	7.05191	7.17161	6.51771	6.53768	6.69783	6.83994	6.59627	6.49336	6.86857	6.75834	7.04329	6.10888	6.77044	6.79934
IDH3G	P51553	IDH3G	Isocitrate dehydrogenase	1.10497	-0.497472	No	0.872212	-0.307389	No	0.0838918	-0.0267398	No	7.89632	7.55933	7.82304	7.53414	7.56687	7.71347	8.41952	8.68422	8.29894	7.75092	7.05365	6.38033	7.66277	7.88934	7.43697	7.27024	7.321	7.33391	7.58892	7.86971	7.46959	7.95451	7.40439	7.17018	NaN	7.35523	6.8312	7.00007	7.30589	7.52716	7.42841	NaN	6.73682	6.94292
IGBP1	P78318	IGBP1	Immunoglobulin-binding protein 1	0.00705467	-0.00602951	No	0.0575385	0.00910195	No	0.365022	-0.128948	No	7.72061	6.92481	7.50537	7.85545	7.22356	7.48595	8.05089	7.27223	7.55666	6.89421	7.41359	7.0962	7.14054	7.61093	7.47624	7.65697	7.47417	7.04221	7.22801	7.65785	7.54724	7.39039	7.13397	7.44916	6.19788	7.27557	7.73988	7.43303	7.50593	7.95278	NaN	6.96254	7.89325	7.36182
IGHA1	P01876	IGHA1	Immunoglobulin heavy constant alpha 1	0.365189	-0.517127	No	0.129165	-0.373378	No	0.400665	0.487742	No	7.98446	7.68903	9.0001	9.9781	9.48679	10.3245	8.33691	8.98156	8.69873	10.3825	9.95281	9.69099	7.68852	9.36577	7.12525	8.21694	7.60762	7.65081	12.1029	8.52877	9.38448	9.00602	9.3792	10.1855	8.46818	7.52867	9.8868	7.39751	9.04184	9.56017	6.69233	8.35614	7.81182	8.45712
IGHG1	P01857	IGHG1	Immunoglobulin heavy constant gamma 1	1.03359	-0.791303	No	0.0352491	0.0950133	No	0.347651	0.472571	No	9.38889	9.17613	10.7326	11.0793	11.2996	11.3439	10.19	11.4151	10.8113	11.8727	11.2691	11.7481	9.00174	11.0171	9.46803	9.8418	9.01155	9.34776	12.1265	9.84038	11.3552	10.0945	10.8451	11.8858	10.0305	9.36344	11.6598	8.7198	10.2568	10.9524	9.05467	9.4712	9.31514	10.6187
IGHG2	P01859	IGHG2	Immunoglobulin heavy constant gamma 2	0.350526	0.141959	No	0.180837	-0.199998	No	1.38849	0.653879	Yes	8.06532	7.6461	9.23575	9.14891	9.54435	7.9205	8.11442	9.05296	8.59905	9.24371	9.3011	NaN	7.64492	8.6189	8.19469	7.54015	9.28038	NaN	9.17135	7.75742	8.9233	7.16729	9.13986	9.66169	7.72347	8.33509	8.0089	NaN	8.82401	8.66217	7.7154	7.59744	6.80061	7.98251
IGHG3	P01860	IGHG3	Immunoglobulin heavy constant gamma 3	0.53214	-0.337991	No	0.0598786	-0.0986164	No	0.233771	0.198387	No	9.31374	8.00872	9.60361	10.3563	10.4628	10.2922	8.95853	9.93423	10.0131	10.2371	9.87856	9.52829	8.33059	10.2712	9.6326	8.81797	9.03255	8.24958	10.7837	9.39367	10.584	9.00736	9.98212	10.4905	8.77024	8.5638	9.95873	8.56148	9.82733	10.0904	8.60051	8.70167	8.37856	9.53807
IGHG4	P01861	IGHG4	Immunoglobulin heavy constant gamma 4	0.839467	0.911992	No	0	1.66488	No	0.76839	1.06352	No	NaN	NaN	6.61821	8.7052	8.76157	6.91596	3.73737	6.36675	7.82446	7.15779	NaN	8.69389	NaN	9.11297	NaN	7.17458	NaN	NaN	8.24943	7.44809	6.92912	NaN	8.15663	9.08951	NaN	NaN	NaN	NaN	7.38488	7.73423	NaN	NaN	NaN	6.41659
IGHM	P01871	IGHM	Immunoglobulin heavy constant mu	0.685768	-1.0863	No	0.341872	-0.64601	No	0.11152	0.144279	No	5.60619	NaN	5.26218	8.82557	8.49802	7.04404	7.77741	8.04012	8.44129	9.01172	7.69037	8.41039	6.29087	8.78449	7.44297	6.76382	6.80578	NaN	9.77035	8.19998	8.4648	6.96167	8.47469	8.34782	NaN	NaN	7.71933	6.80607	8.27561	7.47242	NaN	6.77646	NaN	7.44771
IGHV3-23	P01764	HV323	Immunoglobulin heavy variable 3-23	0	-3.06605	No	0	NaN	No	0	0.574419	No	NaN	NaN	NaN	NaN	2.93876	7.17052	NaN	5.81328	NaN	6.00481	NaN	NaN	NaN	NaN	NaN	NaN	NaN	NaN	8.53166	NaN	6.19475	NaN	NaN	6.88937	NaN	NaN	NaN	NaN	NaN	6.31495	NaN	NaN	NaN	NaN
IGKC	P01834	IGKC	Immunoglobulin kappa constant	0.0220462	-0.0281178	No	0.0247234	-0.0679208	No	0	2.02888	No	NaN	NaN	9.75316	10.1588	9.10737	8.53306	NaN	9.52717	9.65488	9.92167	9.79329	10.1534	NaN	9.93035	8.45833	7.8044	NaN	NaN	10.8407	8.34792	9.80976	8.23916	9.17213	10.3176	NaN	NaN	9.05768	NaN	NaN	8.28876	NaN	NaN	NaN	7.75135
IGKV2-28	A0A075B6P5	KV228	Immunoglobulin kappa variable 2-28	0.190842	-0.257654	No	0.528456	-0.927322	No	0.43196	0.879071	No	NaN	NaN	6.98304	7.20146	6.22225	7.14322	6.09808	6.98378	6.78856	7.40737	7.14792	7.63079	6.20493	6.94908	6.23541	5.22053	NaN	NaN	9.16084	6.44319	7.12362	5.59158	6.35449	7.3584	NaN	NaN	6.91935	5.21036	6.81791	6.44711	NaN	NaN	4.73	NaN
IGKV3D-20	A0A0C4DH25	KVD20	Immunoglobulin kappa variable 3D-20	0.0388654	-0.0470978	No	0	0.468616	No	0	NaN	No	NaN	4.68431	4.56131	6.38295	NaN	5.91558	5.50466	4.26966	5.99555	NaN	4.00357	5.4342	NaN	5.50591	NaN	NaN	NaN	NaN	6.89069	5.03729	NaN	NaN	4.61262	6.73514	NaN	NaN	5.85403	NaN	NaN	NaN	NaN	5.21371	NaN	NaN
IGLC2	P0DOY2	IGLC2	Immunoglobulin lambda constant 2	0.511533	-0.700259	No	0.0970881	0.277686	No	0.118529	0.21067	No	6.95707	6.82427	8.06672	9.32915	9.35415	9.6641	7.94369	8.1169	8.43589	9.87207	9.40038	9.33137	7.54183	9.01033	7.87977	7.86014	6.94269	5.94552	11.0264	8.02842	9.32794	8.08675	8.93453	9.46572	8.31045	5.75679	9.21063	6.27939	8.58397	8.80797	6.2828	7.02592	7.62095	8.37187
IGLL5	B9A064	IGLL5	Immunoglobulin lambda-like polypeptide 5	0.876335	-0.429034	No	1.34289	0.337829	No	1.44892	0.449278	No	NaN	6.04516	7.37535	7.60375	7.08524	7.25132	6.35771	7.59194	7.74253	8.13345	7.62565	NaN	NaN	7.66837	7.35194	6.98196	7.01302	NaN	8.56807	7.31734	7.22086	6.72539	6.88113	7.56902	NaN	NaN	7.10134	7.23814	6.51229	7.17241	NaN	NaN	6.29913	7.00869
IGLON5	A6NGN9	IGLO5	IgLON family member 5	0.928106	-0.352589	No	0.833509	-0.174556	No	0.262011	-0.22351	No	6.4046	6.4595	6.28546	6.54261	6.45117	6.18094	6.91508	6.78198	7.38608	6.6422	6.4484	5.82916	6.26977	6.92794	6.94134	6.44229	7.08005	5.86506	6.42545	7.16216	6.85372	6.51979	5.68212	5.6164	NaN	5.82227	NaN	5.13077	6.10365	NaN	NaN	5.43606	NaN	5.76599
IGLV3-9	A0A075B6K5	LV39	Immunoglobulin lambda variable 3-9	0	NaN	No	0	NaN	No	0	NaN	No	NaN	NaN	NaN	4.63313	NaN	NaN	NaN	5.52704	NaN	NaN	4.447	NaN	NaN	NaN	NaN	NaN	NaN	NaN	7.32178	NaN	NaN	NaN	NaN	6.47079	NaN	NaN	NaN	NaN	NaN	NaN	NaN	NaN	NaN	NaN
IGSF21	Q96ID5	IGS21	Immunoglobulin superfamily member 21	1.52984	-0.363845	No	1.19721	-0.448233	No	2.24241	-0.597848	No	7.44983	7.79204	7.07874	7.41598	7.25261	7.84926	8.05016	7.40484	8.16639	7.33778	6.99765	6.21583	7.2744	7.33932	7.60209	7.67576	7.42949	7.46052	7.11288	7.88478	7.82629	8.0805	6.98581	6.33887	6.37574	6.23307	6.66826	6.57699	7.04592	6.95864	7.26144	6.93611	7.56279	7.00091
IGSF8	Q969P0	IGSF8	Immunoglobulin superfamily member 8	1.03928	-0.182413	No	1.46647	-0.416875	No	0.749995	-0.408432	No	11.7071	12.1381	11.8875	12.0828	11.5972	11.9579	12.338	11.8199	12.5131	11.696	11.434	10.8687	11.612	11.7562	12.2995	12.0023	11.9919	11.7851	11.8763	12.3765	12.2111	12.2331	11.2332	11.4326	11.4663	11.2505	11.6491	12.548	11.5886	12.0798	12.5249	11.4712	12.5426	11.8232
IL1RN	P18510-2	IL1RA	Interleukin-1 receptor antagonist protein	0.0620066	-0.0733891	No	0.0399463	0.0968735	No	0.400611	1.31084	No	NaN	NaN	4.06004	6.12877	4.3842	6.20093	NaN	4.43316	5.43512	4.9249	5.85301	5.53813	NaN	5.27367	NaN	4.96769	NaN	NaN	7.70783	4.47946	5.23411	5.56815	4.99917	6.26231	NaN	NaN	5.43683	NaN	4.63301	4.00679	NaN	NaN	NaN	NaN
IL36G	Q9NZH8	IL36G	Interleukin-36 gamma	0.00234987	0.00544087	No	0.302233	0.566725	No	0.720869	1.9168	No	NaN	NaN	7.73688	8.68858	8.1052	7.52741	7.48264	7.76911	7.42987	9.31537	7.6517	8.65328	5.75402	7.6393	NaN	6.68568	5.84407	NaN	7.32894	6.55379	8.156	5.73699	7.80794	9.51357	5.99953	7.24233	8.79614	NaN	7.795	7.06154	NaN	NaN	5.5107	6.77191
ILF2	Q12905	ILF2	Interleukin enhancer-binding factor 2	2.01055	1.03127	Yes	2.75121	1.26002	Yes	2.22359	1.20188	Yes	7.98801	8.8561	8.4178	7.31925	7.75806	7.30217	7.23917	6.91089	6.79537	6.93528	8.40469	7.96424	8.0095	7.82158	7.10661	8.1942	6.40477	6.43981	6.8406	6.52161	6.65329	7.08062	7.52577	8.04005	7.54082	8.13668	7.54038	7.49579	6.97913	6.47906	7.1473	6.74674	5.43105	6.28495
ILF3	Q12906	ILF3	Interleukin enhancer-binding factor 3	1.99697	0.912092	Yes	3.7296	0.844891	Yes	3.00607	0.975265	Yes	7.08656	6.95316	7.5597	6.52203	7.25861	6.27708	6.34666	5.92124	5.99917	6.27546	7.29592	6.80464	7.33474	7.42362	6.35462	7.34654	6.61258	6.06433	6.53422	6.18454	5.6614	6.43364	6.70292	7.2388	7.08918	7.57384	6.54682	6.41174	5.8676	6.47543	6.12436	5.90647	5.77598	5.56187
IMMT	Q16891	MIC60	MICOS complex subunit MIC60	1.55311	-0.503381	No	0.781399	-0.179375	No	0.454625	-0.143814	No	8.75275	8.30279	9.13241	8.3747	8.9632	9.23996	9.22049	9.40085	9.11677	9.06468	7.90184	8.05648	8.71164	8.34173	8.68528	8.8121	8.49855	8.30509	8.48323	8.47125	8.75506	9.07214	8.82476	8.11034	7.7284	8.06016	7.9775	8.22731	8.60243	8.50317	8.11893	7.75195	8.47462	8.34023
IMPA1	P29218	IMPA1	Inositol monophosphatase 1	1.50975	-0.320287	No	0.71215	-0.150101	No	1.35702	-0.265939	No	10.2748	10.5538	10.8537	10.2557	10.4333	10.4664	11.0716	10.872	10.7885	10.7742	10.262	10.0956	10.5099	10.1315	10.5086	10.2403	10.2691	10.5811	10.6902	10.2302	10.2997	10.5782	10.5156	10.0721	10.0972	9.99915	10.1176	9.81717	10.7091	10.2812	10.7864	10.0617	10.5155	9.86039
IMPDH2	P12268	IMDH2	Inosine-5'-monophosphate dehydrogenase 2	0.194964	-0.0937428	No	0.203543	-0.169666	No	0.757947	0.705103	No	6.41522	6.32796	6.31919	6.2386	6.65922	5.80319	6.46015	6.68982	6.64822	6.82752	6.53978	7.17777	5.43592	6.70481	5.67297	5.67096	6.48215	NaN	6.72046	5.99999	5.76314	5.90703	6.6111	6.97519	5.91529	6.61433	7.06682	NaN	6.44924	6.3556	NaN	5.28047	NaN	5.82229
INA	Q16352	AINX	Alpha-internexin	0.690915	-0.153963	No	0.987597	-0.200687	No	0.437538	-0.16897	No	11.5621	11.7436	11.6558	11.6075	11.8588	11.7213	12.0319	11.9506	11.8748	11.619	11.3539	10.7681	11.385	11.7598	11.8461	11.7998	11.8061	11.112	11.4182	12.1595	11.6576	11.9635	11.1107	11.2279	11.2835	10.9719	11.6971	11.7767	11.3506	11.7581	11.7208	10.7684	12.1838	11.3
IPO5	O00410	IPO5	Importin-5	0.243978	-0.166787	No	0.438832	0.122982	No	0.0314536	-0.0229634	No	6.96842	6.92063	5.91329	6.34695	5.87361	6.33673	6.65935	6.72591	6.96462	6.17022	5.41438	NaN	6.62273	7.06493	5.79369	6.10257	5.75405	5.44623	6.3742	6.92061	5.57916	5.75536	6.31664	5.6683	5.92642	6.03945	5.74922	6.09192	6.12269	5.97212	5.50642	5.66394	6.89532	5.76923
IPO7	O95373	IPO7	Importin-7	0	1.8171	No	0	0.364857	No	0	0.524549	No	7.32931	4.60628	NaN	NaN	NaN	5.51221	NaN	NaN	NaN	NaN	7.00144	NaN	NaN	8.17113	NaN	NaN	NaN	NaN	NaN	7.80628	NaN	NaN	7.3206	NaN	NaN	6.65293	NaN	NaN	6.79605	NaN	NaN	NaN	NaN	NaN
IPO9	Q96P70	IPO9	Importin-9	0.118635	0.204319	No	0.423364	-0.287922	No	0.143496	-0.226701	No	6.59375	NaN	6.01147	6.19722	6.3799	4.64461	6.62996	6.78868	6.70261	6.22917	5.04684	NaN	6.54519	6.22043	5.64135	6.31246	5.97585	NaN	5.86787	6.62819	6.4227	6.31127	6.17469	5.90116	5.88072	NaN	6.27428	5.20615	5.92231	6.60694	NaN	NaN	NaN	NaN
IQGAP1	P46940	IQGA1	Ras GTPase-activating-like protein IQGAP1	0.642362	0.369597	No	0.292206	0.187674	No	0.23598	0.245045	No	8.56019	7.43236	6.68705	7.02318	6.44385	8.40168	7.21706	6.33868	5.68381	6.65742	7.7241	8.10389	7.39821	7.10732	6.82818	6.23397	8.01585	7.0471	7.89726	7.25045	5.91345	6.14551	7.75278	6.19091	7.33476	8.09216	5.86798	6.15233	7.539	6.67308	6.55212	6.62047	6.62869	NaN
IQSEC1	Q6DN90	IQEC1	IQ motif and SEC7 domain-containing protein 1	0.189953	-0.108492	No	1.48883	-0.289011	No	0.250854	-0.110173	No	7.39891	7.64544	7.68814	7.35207	7.62696	6.6965	8.13045	7.87767	7.84633	7.70303	6.93331	6.6076	7.10678	7.59225	7.42787	7.56504	7.40411	7.18201	7.0334	7.80319	7.84249	7.70172	7.04203	6.69692	6.40257	6.37985	7.24722	7.60091	7.39143	7.08964	6.83594	6.04832	7.6159	7.04931
IQSEC2	Q5JU85	IQEC2	IQ motif and SEC7 domain-containing protein 2	0.651844	-0.294141	No	0.507571	-0.329329	No	0.180925	-0.171306	No	6.16131	6.44155	6.33311	6.17886	6.2671	5.68129	6.76654	6.74037	6.89118	6.77324	5.33169	6.78594	6.36682	6.63012	6.49572	6.69061	6.63574	NaN	6.84246	6.33056	6.82942	6.52342	6.10396	6.36825	NaN	NaN	6.05419	5.80543	6.40525	5.52226	5.99553	6.46305	6.80354	6.28601
IRGQ	Q8WZA9	IRGQ	Immunity-related GTPase family Q protein	0.332169	0.0415112	No	0.621823	-0.189157	No	0.261501	-0.199685	No	7.38938	6.8803	7.47296	7.54401	6.63057	7.33958	6.65883	7.44137	7.63957	6.63031	7.63891	6.8428	7.41122	7.39478	7.38314	7.43521	8.00581	7.21243	7.396	7.91871	6.96518	7.74289	6.81543	6.59522	NaN	NaN	7.3	7.65713	7.09798	7.13495	7.17551	6.46039	7.93476	6.99881
IRS2	Q9Y4H2	IRS2	Insulin receptor substrate 2	0.307698	0.38735	No	0.171623	0.192672	No	NaN	0	No	NaN	NaN	4.4108	5.57084	5.27339	NaN	5.49916	3.29439	5.04832	5.75028	3.48441	NaN	NaN	5.10318	6.28476	5.42512	NaN	NaN	NaN	5.47969	5.33433	5.42102	NaN	NaN	NaN	NaN	NaN	NaN	NaN	NaN	NaN	NaN	NaN	NaN
ISCA2	Q86U28	ISCA2	Iron-sulfur cluster assembly 2 homolog, mitochondrial	1.39468	-0.709989	No	0.338346	0.165013	No	0.26493	-0.579525	No	5.36341	4.7992	5.44152	5.09802	5.75069	5.19131	6.00066	6.40573	6.00554	6.39954	NaN	NaN	4.86562	6.36283	NaN	6.04793	NaN	NaN	NaN	6.34276	5.30876	5.73798	5.56387	4.93598	NaN	NaN	5.48031	NaN	5.47907	6.17983	5.58709	NaN	NaN	NaN
ISOC1	Q96CN7	ISOC1	Isochorismatase domain-containing protein 1	0.319094	-0.219442	No	0	NaN	No	0	NaN	No	5.55611	4.96092	NaN	5.7644	NaN	NaN	5.38619	2.85256	5.77801	3.82085	NaN	NaN	NaN	NaN	NaN	NaN	NaN	NaN	3.76973	NaN	NaN	4.62512	NaN	NaN	NaN	3.44255	NaN	NaN	NaN	NaN	NaN	NaN	NaN	NaN
IST1	P53990	IST1	IST1 homolog	0.759548	-0.40407	No	0	-0.513582	No	NaN	0	No	NaN	NaN	5.05887	4.66969	5.07217	NaN	5.31894	5.73138	5.18443	5.09713	NaN	NaN	NaN	NaN	NaN	5.11933	NaN	NaN	5.38816	4.85172	5.08092	5.63291	NaN	NaN	NaN	NaN	NaN	NaN	NaN	NaN	NaN	NaN	NaN	NaN
ITGA6	P23229	ITA6	Integrin alpha-6	0.557356	0.348689	No	1.33717	-0.387084	No	0.00197487	-0.00524569	No	NaN	NaN	6.06058	5.85362	5.96779	6.66944	5.4887	6.1612	5.4036	5.27113	5.12981	NaN	NaN	5.86377	5.9975	6.49053	NaN	NaN	NaN	6.22584	6.24968	7.03754	NaN	NaN	NaN	NaN	5.89757	7.5094	6.57862	7.38272	6.82664	NaN	6.63886	6.7786
ITGAM	P11215	ITAM	Integrin alpha-M	0.0446135	-0.0442886	No	0.137741	-0.198107	No	0.0261231	-0.0340111	No	5.41557	6.02195	6.0232	6.23127	6.70828	6.65259	5.74596	5.34895	5.84819	7.02603	5.8547	5.16145	4.6321	6.91596	5.42281	5.78978	NaN	4.81802	5.59665	5.7332	7.24587	5.51889	5.88653	5.97242	5.89503	NaN	6.22627	NaN	5.55068	6.37629	NaN	NaN	NaN	5.79991
ITGB1	P05556	ITB1	Integrin beta-1	1.02493	0.68673	No	0.348452	0.168493	No	0.377072	-0.467	No	5.86436	5.35451	5.71388	4.98879	5.62232	4.25862	5.3262	5.78634	4.06564	4.6734	5.88163	NaN	NaN	5.3537	5.3964	5.82077	5.42712	NaN	5.47504	5.13859	NaN	5.98491	5.77105	5.07691	NaN	NaN	4.65322	6.48729	6.07932	6.41409	5.33903	NaN	NaN	6.24285
ITGB2	P05107	ITB2	Integrin beta-2	0.618342	1.60781	No	0.195055	0.405115	No	0	-0.718784	No	NaN	NaN	6.12702	6.10371	6.0461	NaN	5.65281	5.15812	NaN	3.79936	NaN	NaN	5.60854	6.64817	NaN	NaN	NaN	NaN	5.83777	5.60871	6.44432	6.21191	5.28762	5.3817	NaN	NaN	NaN	NaN	6.00641	NaN	NaN	NaN	5.41241	6.39746
ITGB4	P16144	ITB4	Integrin beta-4	0	0.534185	No	0	NaN	No	0	NaN	No	NaN	NaN	NaN	NaN	5.48859	NaN	NaN	4.75274	NaN	4.9544	NaN	NaN	NaN	NaN	NaN	NaN	NaN	NaN	NaN	NaN	NaN	6.54222	NaN	NaN	NaN	NaN	NaN	NaN	NaN	NaN	NaN	NaN	7.33326	5.68901
ITIH2	P19823	ITIH2	Inter-alpha-trypsin inhibitor heavy chain H2	0.0346474	0.00967674	No	2.00343	0.35616	No	0.236681	-0.16702	No	6.71386	8.3414	8.60022	8.95306	8.05517	6.39736	8.2558	8.64369	9.00486	8.3136	8.67089	7.54111	7.49507	8.59467	8.74112	9.13386	8.26418	6.79654	7.12233	8.32157	8.61108	8.92405	6.72471	7.34071	6.08106	7.2981	8.30272	8.94629	7.00077	7.96939	7.15108	7.60662	7.77674	8.19111
ITIH3	Q06033	ITIH3	Inter-alpha-trypsin inhibitor heavy chain H3	0	4.41868	No	0	0.364691	No	0	NaN	No	10.3777	NaN	2.54654	8.85559	NaN	5.95905	NaN	NaN	NaN	NaN	6.85967	4.36737	NaN	9.31831	NaN	NaN	NaN	NaN	NaN	8.95362	NaN	NaN	8.73522	NaN	NaN	8.7273	NaN	NaN	NaN	NaN	NaN	NaN	NaN	NaN
ITPKA	P23677	IP3KA	Inositol-trisphosphate 3-kinase A	0.835071	-0.393314	No	0.164552	-0.0855006	No	NaN	0	No	NaN	5.3746	5.03039	5.62882	5.59263	NaN	6.29422	5.5291	5.71803	5.65834	3.22494	NaN	4.77992	5.42381	NaN	5.30427	NaN	NaN	4.50206	5.67503	5.16914	5.5874	NaN	NaN	NaN	NaN	NaN	NaN	NaN	NaN	NaN	NaN	NaN	NaN
ITPR1	Q14643	ITPR1	Inositol 1,4,5-trisphosphate receptor type 1	0.148866	-0.294341	No	0.296976	0.577018	No	0	0.975719	No	5.60449	2.82323	4.75424	5.34151	4.84185	3.75949	5.59814	4.87043	5.36667	5.24229	NaN	NaN	NaN	5.06899	NaN	5.29202	3.5575	5.23056	6.21759	5.07755	5.47915	4.12942	5.46741	4.87132	NaN	NaN	4.5882	NaN	4.49169	NaN	NaN	NaN	NaN	NaN
ITSN1	Q15811	ITSN1	Intersectin-1	0.361001	-0.892757	No	0	-0.253623	No	0	NaN	No	5.82544	2.76424	7.96985	7.35873	6.7938	4.93533	7.65307	7.5578	7.72845	7.30119	6.73892	NaN	NaN	NaN	NaN	NaN	6.99254	NaN	7.80964	7.40155	NaN	7.69324	NaN	NaN	NaN	NaN	NaN	NaN	6.78031	6.76355	6.95103	NaN	7.15597	NaN
ITSN2	Q9NZM3	ITSN2	Intersectin-2	0.546865	0.61708	No	0.0532333	-0.094023	No	0	NaN	No	6.44761	5.9017	6.08694	5.89888	6.91817	NaN	5.97293	5.55846	NaN	5.52418	NaN	NaN	NaN	5.91856	6.03011	6.59957	NaN	5.63053	6.45614	6.52576	NaN	6.18041	NaN	NaN	6.59489	NaN	5.98173	6.29998	NaN	6.15162	NaN	NaN	NaN	NaN
IVD	P26440	IVD	Isovaleryl-CoA dehydrogenase, mitochondrial	0.363435	-0.273657	No	0.448402	-0.161167	No	0.00561377	-0.00490689	No	8.06303	6.7363	7.62286	6.51384	6.68617	7.34003	7.97241	7.75916	6.97966	6.93923	6.85401	7.25868	7.757	7.06691	7.63212	7.41154	7.52485	7.72062	7.37285	6.90874	7.77907	7.64115	7.78071	6.49966	7.03234	8.24594	7.12738	7.87541	7.68735	7.38766	7.61091	7.15931	7.29737	7.44829
IVL	P07476	INVO	Involucrin	0.111033	-0.146942	No	0.200237	-0.818385	No	0.149123	0.686602	No	5.31015	5.57969	5.55173	8.17574	6.58416	6.21713	5.51808	5.54484	6.73313	7.923	7.72615	7.11758	6.20543	7.46418	6.18596	NaN	5.81407	NaN	10.9861	6.19843	7.85663	5.653	6.19208	8.0048	NaN	NaN	7.03201	NaN	6.90354	5.92014	NaN	6.02839	NaN	6.77422
JCHAIN	P01591	IGJ	Immunoglobulin J chain	0.0643607	-0.152402	No	0.137042	0.278786	No	0.526156	0.671718	No	7.66019	8.28566	9.31297	10.5667	11.0073	10.797	8.91713	8.60138	9.02087	10.2585	9.69019	9.96811	8.89713	9.98098	8.46992	8.43529	7.69187	7.31014	10.9791	9.3345	9.9034	8.5499	9.45496	10.1434	9.4831	8.21977	10.0278	8.3476	9.76206	9.03456	7.14317	7.67166	8.18754	9.8473
JPT1	Q9UK76	JUPI1	Jupiter microtubule associated homolog 1	0.702151	0.534556	No	0.135986	-0.0692765	No	0.582306	-0.395408	No	7.277	8.46072	8.40202	8.0799	7.69866	5.54317	8.26677	7.58382	7.86706	7.9847	7.75411	NaN	7.24822	8.12376	6.90713	7.41393	7.12176	NaN	7.46632	8.17429	7.14248	7.88869	NaN	NaN	6.86786	NaN	6.37621	6.90267	7.00609	7.11653	7.09096	NaN	6.94393	NaN
JUP	P14923	PLAK	Junction plakoglobin	0.674396	-1.16334	No	0.213486	0.542397	No	0.526585	0.745864	No	8.24206	8.63407	11.5525	12.2203	12.7218	11.9153	10.8413	11.8403	11.5314	13.0591	11.6117	12.0876	10.2656	11.6414	9.40209	10.344	9.00139	8.63936	12.5716	10.6472	11.8491	9.38933	11.4232	13.1827	10.5491	9.85605	12.7034	9.43973	11.5685	11.3071	9.55078	9.8454	9.63975	10.7675
KARS1	Q15046	SYK	Lysine--tRNA ligase	0.0542334	-0.075012	No	0.398201	0.28985	No	0	NaN	No	NaN	NaN	5.84144	NaN	6.02519	NaN	6.11473	6.31861	6.18955	5.69804	5.79577	NaN	NaN	6.62698	NaN	6.691	NaN	NaN	5.95309	6.54756	5.71247	6.19073	6.01966	6.34861	NaN	NaN	NaN	6.07736	NaN	NaN	NaN	NaN	NaN	NaN
KBTBD11	O94819	KBTBB	Kelch repeat and BTB domain-containing protein 11	1.14148	-0.403069	No	1.38151	-0.220722	No	0.708486	-0.258732	No	8.73322	8.66694	9.03973	8.66756	9.02244	8.72266	9.4409	9.34321	9.47559	9.16288	8.49293	7.74543	8.86174	9.02189	9.11217	9.28571	8.95488	8.16124	8.84367	9.24145	9.12444	9.5185	8.4644	8.9488	8.07615	8.17329	8.94189	9.27932	9.04477	9.24682	8.8703	8.08929	9.26924	8.91583
KCNAB2	Q13303	KCAB2	Voltage-gated potassium channel subunit beta-2	1.07643	0.41225	No	0.0300339	-0.0186901	No	0.200611	0.176751	No	6.60199	7.38639	7.35188	7.45592	6.75581	6.3346	6.36299	6.74747	7.3722	6.67348	6.12205	6.67585	6.52385	6.85186	6.93897	7.08291	6.87276	6.24537	6.47258	7.18415	6.2647	7.26808	7.05834	7.03355	6.21092	5.92023	6.74837	6.18758	7.15757	5.87121	6.46931	NaN	6.84608	NaN
KCNQ2	O43526	KCNQ2	Potassium voltage-gated channel subfamily KQT member 2	0.828271	-0.304636	No	0.492487	-0.230309	No	0.124132	-0.0526935	No	5.8163	6.48174	6.14078	5.64982	5.75441	6.49639	6.70909	5.8508	6.23851	6.07144	6.09909	6.0446	5.29752	5.65233	5.82567	5.77023	5.63401	5.69463	5.73863	6.1982	6.2411	6.56472	5.83275	6.08398	6.03402	5.93171	6.37956	6.64063	6.32491	6.28161	5.59015	5.84673	6.48208	NaN
KCTD12	Q96CX2	KCD12	BTB/POZ domain-containing protein KCTD12	0.419803	-0.0553234	No	1.02787	-0.1621	No	0.817365	-0.388359	No	8.97819	9.2467	9.01322	9.41708	8.87023	9.21655	9.28011	8.90172	9.5003	8.90334	9.22821	8.14502	8.91469	9.57395	9.25952	9.41054	9.45241	8.48587	8.82064	9.92739	9.20857	9.60964	8.68866	8.38078	8.34817	8.56563	8.99214	9.34862	9.0392	9.05443	9.37276	8.75898	9.67871	8.75006
KCTD16	Q68DU8	KCD16	BTB/POZ domain-containing protein KCTD16	0.564418	-0.138436	No	0.268876	-0.145213	No	0.031577	-0.0167297	No	7.10051	7.65615	7.82024	7.24738	7.29589	7.32139	8.10432	7.59716	7.32925	7.46023	6.84939	NaN	NaN	7.431	7.17876	7.46601	7.59061	6.48707	6.74026	7.43138	6.94075	7.54327	6.63281	6.67686	NaN	NaN	6.68083	7.0458	6.55258	6.46298	7.03879	NaN	7.02513	NaN
KHDRBS1	Q07666	KHDR1	KH domain-containing, RNA-binding, signal transduction-associated protein 1	2.02855	1.69507	Yes	1.9783	1.70789	Yes	0	-0.123517	No	7.32182	8.25707	7.5496	6.21386	7.33936	NaN	6.08246	5.81463	5.32531	5.35721	7.63702	6.87295	7.41673	7.45834	6.25668	7.85009	5.60833	NaN	5.74167	NaN	NaN	6.43017	6.12696	6.96949	7.21767	7.06353	7.02029	6.6113	NaN	7.09301	NaN	NaN	NaN	NaN
KHSRP	Q92945	FUBP2	Far upstream element-binding protein 2	2.21084	0.963448	Yes	2.77651	0.860943	Yes	0.841968	0.360472	No	8.13062	8.71293	8.48136	7.41891	7.98305	7.4364	7.43938	7.12463	7.02424	6.88498	7.9054	7.30001	8.43268	8.48782	7.47052	8.88924	7.12974	6.7465	7.53004	7.91472	5.97337	8.02565	7.28211	7.89987	7.51711	7.92806	7.61036	7.34198	6.91728	8.07338	7.5757	6.68369	7.38466	6.78196
KIAA0513	O60268	K0513	Uncharacterized protein KIAA0513	0.722942	-0.439138	No	1.25508	-0.577686	No	1.2521	-0.627873	No	6.89719	6.81854	7.35454	6.84212	7.63008	6.42713	7.82497	7.72538	7.87861	7.88206	5.47389	5.65072	6.97141	6.99345	6.78116	7.11745	6.95491	5.90345	6.8453	7.69511	7.05096	8.00445	5.9332	6.34821	NaN	5.0918	6.20773	6.20859	7.00164	6.68791	6.10941	6.19091	6.97906	6.06937
KIAA1217	Q5T5P2	SKT	Sickle tail protein homolog	0.012221	0.00685072	No	1.71307	-0.329763	No	0.0708976	-0.0568254	No	6.7335	7.67534	7.28053	7.16506	7.41613	6.05244	8.02759	7.36402	7.45558	7.33668	5.84972	5.98547	6.90674	7.15127	6.98989	7.46538	5.98027	NaN	7.30041	7.46615	7.6145	7.65047	6.63045	6.36013	NaN	NaN	7.36789	6.60472	6.35185	7.0626	6.05196	5.98187	7.67474	6.10128
KIAA1671	Q9BY89	K1671	Uncharacterized protein KIAA1671	0.0978908	0.145596	No	0.0799348	0.0695683	No	0.415663	-0.526621	No	7.69678	6.34111	5.53689	7.16489	7.1243	6.21863	5.52303	7.2455	7.07043	7.07841	7.61776	NaN	7.52026	7.0694	7.79767	7.22328	8.10682	NaN	7.04662	NaN	NaN	6.99915	6.84614	6.41715	NaN	NaN	NaN	NaN	7.01001	7.30653	7.13472	NaN	NaN	NaN
KIF1A	Q12756	KIF1A	Kinesin-like protein KIF1A	1.3326	-0.400233	No	1.19832	-0.343184	No	1.88312	-0.353512	No	8.29929	8.21154	8.64647	8.30234	8.60901	8.8034	8.98967	8.84684	8.84599	8.58392	7.93165	6.66413	8.15441	8.76961	8.468	8.45743	8.58831	7.50216	8.07798	8.79222	8.75923	8.78443	8.08443	7.83244	7.38313	7.36138	8.44853	8.01977	8.36033	8.05554	8.16338	7.79198	8.72354	8.15598
KIF21A	Q7Z4S6	KI21A	Kinesin-like protein KIF21A	1.53355	-0.319397	No	1.24655	-0.309393	No	0.830323	-0.307267	No	8.88817	9.0292	8.97129	8.58589	8.95755	9.14641	9.52602	9.17445	9.16599	9.01622	8.26499	8.00687	8.87757	8.65556	9.11085	9.19111	8.88122	8.47079	8.89102	9.25373	8.99391	9.47264	8.59575	8.24007	8.4215	8.54852	8.80944	8.97078	8.98529	9.20897	8.99185	8.40148	9.05813	8.78394
KIF2A	O00139	KIF2A	Kinesin-like protein KIF2A	2.52457	-0.68355	No	0.636927	-0.295766	No	0.59749	-0.24665	No	6.77374	6.70457	7.13987	6.66963	7.01011	7.41001	7.68301	7.72797	7.51723	7.37745	5.84364	5.97856	6.72405	6.9794	6.88013	6.92285	6.86117	NaN	6.46035	7.21576	7.25547	7.03616	7.11837	6.41896	5.59569	5.71707	6.69391	6.58638	7.2396	6.75912	6.51462	NaN	6.6396	6.49362
KIF3A	Q9Y496	KIF3A	Kinesin-like protein KIF3A	0.0177514	0.014771	No	0.168482	0.0695516	No	0.31774	-0.290924	No	6.02581	5.67773	6.07247	6.12715	5.74153	5.59244	6.5798	5.42642	6.40831	5.56387	6.68504	NaN	5.70766	5.86573	5.70128	6.00113	6.39329	5.66118	5.1732	5.86196	5.83565	6.34897	5.08041	5.08921	NaN	5.10661	6.10383	NaN	5.91832	5.45335	NaN	4.77734	NaN	NaN
KIF3B	O15066	KIF3B	Kinesin-like protein KIF3B	0.269452	-0.166709	No	0.200277	-0.577376	No	0	NaN	No	NaN	NaN	4.10415	4.52978	4.85675	NaN	4.27971	4.15899	5.13188	4.69993	NaN	NaN	NaN	4.16446	2.98921	4.5836	NaN	NaN	3.49926	5.23874	5.04394	3.18672	NaN	NaN	NaN	NaN	NaN	NaN	5.01921	NaN	NaN	NaN	5.00529	NaN
KIF5B	P33176	KINH	Kinesin-1 heavy chain	0.76344	-0.415754	No	0.248271	0.346861	No	0	-0.235567	No	5.95729	4.45596	5.8757	5.68014	5.6302	6.91522	5.42882	5.55189	5.77508	6.00705	NaN	NaN	4.9647	5.51391	5.88656	5.69285	5.51919	NaN	5.73375	5.22505	4.07881	5.63297	6.38221	NaN	NaN	NaN	5.36168	NaN	NaN	4.80159	5.34342	NaN	5.59724	NaN
KIF5C	O60282	KIF5C	Kinesin heavy chain isoform 5C	1.5013	-0.362942	No	0.0410955	0.0105515	No	2.48516	-0.352934	No	7.12593	7.50447	7.64705	7.31733	7.68962	7.78584	8.0423	8.03036	7.50444	7.73617	7.0483	6.4021	7.36613	7.64743	7.14784	7.57286	6.90973	6.05542	7.50902	7.5598	7.35112	7.73626	7.48062	7.23676	6.80708	6.66772	6.95625	6.9995	7.8683	7.51692	7.34931	6.73632	7.41124	7.38344
KIT	P10721	KIT	Mast/stem cell growth factor receptor Kit	0.268268	-0.129737	No	0.677829	-0.313033	No	0.119959	0.0840986	No	7.44014	7.21052	7.85854	7.40321	7.46775	7.11241	6.9345	8.07044	8.10065	7.81083	6.16212	6.55077	7.21441	7.34138	7.54953	7.73762	7.36582	7.20816	7.42668	7.44822	7.28315	7.702	7.01123	6.98895	NaN	NaN	7.00771	7.50294	7.49021	6.40859	7.00266	NaN	7.19343	7.08219
KLC1	Q07866	KLC1	Kinesin light chain 1	0.0716353	-0.0265085	No	0.542707	-0.27775	No	0.461079	-0.491089	No	6.38098	7.3518	6.64493	5.56721	6.47837	6.49031	6.96113	6.63868	5.98545	6.48026	NaN	4.88147	6.30852	6.23903	NaN	6.68883	6.5582	NaN	6.4532	6.89697	6.49334	6.71946	4.07559	6.31158	5.75128	NaN	6.38635	7.19356	6.18216	6.51911	6.49593	NaN	6.41714	6.55946
KLC2	Q9H0B6	KLC2	Kinesin light chain 2	0.136684	0.0351586	No	0.308723	-0.121227	No	0.655805	-0.420671	No	6.42224	6.81683	6.45512	6.22129	6.64758	6.08248	7.03812	6.33178	6.20553	6.72936	6.43013	NaN	5.90916	6.32073	6.36789	6.58452	6.08608	5.67373	6.43574	6.74164	6.28667	6.66844	6.11529	6.33723	6.27459	3.98665	6.1928	6.54055	6.15026	6.58449	6.37751	5.85022	6.64152	6.36715
KLK10	O43240	KLK10	Kallikrein-10	0.406162	-0.503515	No	1.07055	-1.29651	No	0.924994	1.61694	No	6.31942	NaN	7.51534	7.77417	7.39361	7.69653	5.61361	7.58757	7.05218	8.68032	7.88637	8.70512	6.01254	6.26593	5.50644	5.93577	NaN	NaN	8.36388	7.00442	7.44616	6.09226	7.39454	8.20841	6.80799	5.87669	8.36719	NaN	6.78916	6.68723	NaN	NaN	5.64291	6.26841
KLK13	Q9UKR3	KLK13	Kallikrein-13	NaN	0	No	0	NaN	No	NaN	0	No	NaN	NaN	NaN	NaN	NaN	NaN	NaN	NaN	NaN	NaN	NaN	NaN	NaN	NaN	NaN	NaN	NaN	NaN	6.76756	NaN	5.62958	NaN	NaN	NaN	NaN	NaN	NaN	NaN	NaN	NaN	NaN	NaN	NaN	NaN
KLK5	Q9Y337	KLK5	Kallikrein-5	0.00394879	-0.00923538	No	0.293696	-0.360761	No	0.131923	0.194946	No	NaN	NaN	6.70621	7.48941	6.98398	7.9176	6.14569	6.93452	6.15399	8.11881	5.96189	7.74792	5.97457	6.23462	5.75312	4.98141	NaN	NaN	6.29273	5.83464	6.91723	NaN	6.57803	7.55976	NaN	6.13651	8.45109	NaN	6.82979	6.91811	NaN	NaN	NaN	NaN
KLK7	P49862	KLK7	Kallikrein-7	0.114003	0.120942	No	0.406751	-0.359082	No	0.662586	0.742445	No	NaN	5.59944	6.72415	6.90535	7.17866	7.12452	6.22789	6.35513	5.84369	7.49712	6.86608	7.84663	6.01349	6.23055	6.54278	5.81148	NaN	NaN	7.3433	6.33698	6.92399	5.43036	6.55522	7.38292	6.71315	7.15329	7.73697	7.65231	6.93181	6.57452	NaN	NaN	5.78989	7.06142
KLK9	Q9UKQ9	KLK9	Kallikrein-9	0	-0.313982	No	0	NaN	No	0	NaN	No	NaN	NaN	NaN	NaN	5.98424	NaN	NaN	4.92623	3.8835	6.29822	NaN	5.62406	NaN	5.24367	NaN	5.01916	NaN	NaN	5.08142	NaN	NaN	NaN	NaN	7.17389	NaN	NaN	7.79712	NaN	NaN	NaN	NaN	NaN	NaN	NaN
KPNA4	O00629	IMA3	Importin subunit alpha-3	0.0737139	-0.203539	No	0.978855	0.364667	No	0	0.714207	No	6.69826	4.98297	3.34718	NaN	5.84261	6.08846	NaN	4.36406	5.11215	NaN	6.10923	NaN	NaN	5.71227	5.59545	6.09062	5.33135	NaN	NaN	5.48716	5.55997	5.67042	5.79437	NaN	NaN	5.81902	NaN	NaN	5.08016	4.9282	NaN	NaN	NaN	NaN
KPNB1	Q14974	IMB1	Importin subunit beta-1	0.251977	-0.0595988	No	0.515329	0.0626437	No	0.461072	0.195999	No	8.47893	8.70765	8.67118	7.79204	8.09885	8.78623	8.60009	8.48074	8.00658	8.17299	7.91176	7.10301	8.2245	8.08633	8.08489	8.14963	7.98911	7.12879	7.93617	8.07293	7.93231	8.12493	8.19613	7.7571	7.52849	8.04063	7.28487	7.53203	8.1634	8.24104	6.96349	7.19546	7.13692	7.46294
KPRP	Q5T749	KPRP	Keratinocyte proline-rich protein	0.370982	-0.848618	No	0.145576	0.32167	No	0.106993	0.234191	No	7.05242	7.63893	10.1279	10.8069	13.431	10.9232	9.73001	10.3519	10.4063	11.889	11.2297	10.3836	9.64064	10.3549	9.04938	9.21149	8.97882	7.85246	11.8848	9.75417	11.0368	8.43261	9.48607	12.4102	9.80285	8.9511	11.2395	8.60041	11.6907	10.682	8.97105	8.48627	8.64142	10.6135
KRAS	P01116-2	RASK	GTPase KRas	1.72595	-0.340681	No	0.0436535	-0.0129261	No	0.0224109	0.0138538	No	8.20722	8.698	8.88841	8.96519	8.95854	8.42135	9.12265	8.98532	9.58259	9.30884	7.92538	7.50868	8.39142	9.04461	8.81471	9.13042	8.04044	NaN	8.43523	8.69504	9.07472	9.12573	8.51254	8.19876	NaN	NaN	8.34349	8.55926	8.38938	8.50001	8.62563	7.23266	8.65016	8.01907
KSR1	Q8IVT5	KSR1	Kinase suppressor of Ras 1	0	NaN	No	0	0.0963008	No	NaN	0	No	NaN	NaN	NaN	NaN	3.51259	NaN	NaN	3.67565	3.9784	NaN	NaN	NaN	NaN	NaN	NaN	3.58571	NaN	NaN	NaN	NaN	NaN	3.48941	NaN	NaN	NaN	NaN	NaN	NaN	NaN	NaN	NaN	NaN	NaN	NaN
KTN1	Q86UP2	KTN1	Kinectin	0.550238	1.28535	No	2.41502	1.20072	Yes	0.853533	0.993473	No	NaN	NaN	6.22376	4.24947	5.74402	5.85882	3.65161	4.32941	NaN	5.06766	6.0143	NaN	4.99668	5.5068	4.37239	4.83362	NaN	NaN	3.78871	4.31334	NaN	NaN	5.54494	5.23522	NaN	5.27955	5.01952	NaN	3.97682	5.05261	NaN	NaN	3.78982	NaN
KYAT3	Q6YP21	KAT3	Kynurenine--oxoglutarate transaminase 3	1.17945	-0.550985	No	0.488104	-0.253143	No	0.991985	-0.523266	No	7.25416	NaN	7.99538	8.47424	7.96966	7.23902	8.30605	8.79668	9.28717	8.57451	7.10843	NaN	NaN	9.16452	7.71731	8.33414	7.85327	NaN	7.29661	8.87624	7.89163	8.71583	7.29189	6.46546	6.88585	NaN	7.3053	NaN	7.73899	NaN	7.75394	NaN	7.5599	NaN
[truncated: 1,297 more rows]
